# Supplementary material for: Multi-Omics Analysis Reveals Potential Therapeutic Targets and Genetic Mechanisms in Primary Biliary Cholangitis
Source: Research Square preprint supplement (doi:10.21203/rs.3.rs-7186861/v1), 2025-08-11
Supplement: Supplementary file 1 [file 0aecb887ab3188ff35146e64.docx]

| **Table S1:The results of SMRIVW analysis on GWAS and mQTL** | | | |  |  |  |  |  |  |  |  |  |  |  |  |  |  |
| --- | --- | --- | --- | --- | --- | --- | --- | --- | --- | --- | --- | --- | --- | --- | --- | --- | --- |
| **ProbeID** | **ProbeChr** | **Gene** | **Probe_bp** | **topSNP** | **topSNP_chr** | **topSNP_bp** | **A1** | **A2** | **b_top** | **se_top** | **p_top** | **b_ivw** | **se_ivw** | **p_ivw** | **n_iv** | **h2cis** | **FDR** |
| cg20826345 | 1 | - | 2350197 | rs867436 | 1 | 2523723 | T | C | 1.07764 | 0.181654 | 3.00E-09 | 1.07764 | 0.181654 | 3.00E-09 | 1 | 0.0154174 | 1.47E-06 |
| cg06513673 | 1 | - | 2357638 | rs7526311 | 1 | 2707438 | T | A | 1.09263 | 0.247397 | 1.00E-05 | 1.09263 | 0.247397 | 1.00E-05 | 1 | 0.00762535 | 0.001554388 |
| cg25880537 | 1 | - | 2365337 | rs12748553 | 1 | 2704471 | T | C | 0.817823 | 0.182096 | 7.09E-06 | 0.817823 | 0.182096 | 7.09E-06 | 1 | 0.014179 | 0.001185272 |
| cg01564665 | 1 | - | 2373855 | rs867436 | 1 | 2523723 | T | C | 0.942641 | 0.158898 | 3.00E-09 | 0.942641 | 0.158898 | 3.00E-09 | 1 | 0.020174 | 1.47E-06 |
| cg15548859 | 1 | - | 2381299 | rs67373773 | 1 | 2710377 | A | G | 0.627806 | 0.142015 | 9.85E-06 | 0.627806 | 0.142015 | 9.85E-06 | 1 | 0.0232914 | 0.001534821 |
| cg10556142 | 1 | - | 2385305 | rs12748553 | 1 | 2704471 | T | C | 1.69462 | 0.377322 | 7.09E-06 | 1.69462 | 0.377322 | 7.09E-06 | 1 | 0.00324634 | 0.001185272 |
| cg11390151 | 1 | - | 2387810 | rs867436 | 1 | 2523723 | T | C | 1.22067 | 0.205763 | 3.00E-09 | 1.22067 | 0.205763 | 3.00E-09 | 1 | 0.0119975 | 1.47E-06 |
| cg25390413 | 1 | - | 2390701 | rs67373773 | 1 | 2710377 | A | G | 0.714007 | 0.161514 | 9.85E-06 | 0.714007 | 0.161514 | 9.85E-06 | 1 | 0.0179902 | 0.001534821 |
| cg07381283 | 1 | - | 2391837 | rs192349427 | 1 | 2523807 | A | C | 1.40822 | 0.251809 | 2.25E-08 | 1.40822 | 0.251809 | 2.25E-08 | 1 | 0.00803842 | 8.54E-06 |
| cg13966547 | 1 | PLCH2 | 2406284 | rs2377041 | 1 | 2713327 | T | C | 0.738242 | 0.166208 | 8.93E-06 | 0.738242 | 0.166208 | 8.93E-06 | 1 | 0.016827 | 0.001422705 |
| cg11229415 | 1 | PLCH2 | 2407652 | rs2377041 | 1 | 2713327 | T | C | 0.52234 | 0.1176 | 8.93E-06 | 0.52234 | 0.1176 | 8.93E-06 | 1 | 0.0337033 | 0.001422705 |
| cg14984126 | 1 | PLCH2 | 2409866 | rs2377041 | 1 | 2713327 | T | C | 0.423609 | 0.0953715 | 8.93E-06 | 0.423609 | 0.0953715 | 8.93E-06 | 1 | 0.0512825 | 0.001422705 |
| cg03847348 | 1 | PLCH2 | 2413705 | rs12748553 | 1 | 2704471 | T | C | 0.46581 | 0.103717 | 7.09E-06 | 0.461602 | 0.095749 | 1.43E-06 | 2 | 0.049515 | 0.000315548 |
| cg03722487 | 1 | PLCH2 | 2415199 | rs4648502 | 1 | 2700117 | G | C | 0.978984 | 0.218683 | 7.59E-06 | 0.978984 | 0.218683 | 7.59E-06 | 1 | 0.00989578 | 0.001251142 |
| cg24902038 | 1 | PLCH2 | 2428882 | rs10752745 | 1 | 2507938 | G | A | -0.401631 | 0.0772738 | 2.02E-07 | -0.401631 | 0.0772738 | 2.02E-07 | 1 | 0.0809859 | 5.68E-05 |
| cg00722329 | 1 | PLCH2 | 2433226 | rs2377041 | 1 | 2713327 | T | C | 0.728405 | 0.163993 | 8.93E-06 | 0.728405 | 0.163993 | 8.93E-06 | 1 | 0.0172959 | 0.001422705 |
| cg16648140 | 1 | PLCH2 | 2434046 | rs12748553 | 1 | 2704471 | T | C | 0.767465 | 0.170883 | 7.09E-06 | 0.767465 | 0.170883 | 7.09E-06 | 1 | 0.0161016 | 0.001185272 |
| cg26783079 | 1 | PLCH2 | 2434058 | rs2016366 | 1 | 2513678 | T | A | 0.966054 | 0.1827 | 1.24E-07 | 0.966054 | 0.1827 | 1.24E-07 | 1 | 0.0138539 | 3.73E-05 |
| cg06350196 | 1 | PLCH2 | 2435087 | rs734999 | 1 | 2513216 | T | C | 0.731647 | 0.138369 | 1.24E-07 | 0.731647 | 0.138369 | 1.24E-07 | 1 | 0.024211 | 3.73E-05 |
| cg24314879 | 1 | PLCH2 | 2435236 | rs4648649 | 1 | 2512650 | C | T | 0.914729 | 0.174642 | 1.63E-07 | 0.914729 | 0.174642 | 1.63E-07 | 1 | 0.0151797 | 4.71E-05 |
| cg08615111 | 1 | PLCH2 | 2435555 | rs10752745 | 1 | 2507938 | G | A | 0.631489 | 0.121498 | 2.02E-07 | 0.631489 | 0.121498 | 2.02E-07 | 1 | 0.0327153 | 5.68E-05 |
| cg20598921 | 1 | PLCH2 | 2435827 | rs6671426 | 1 | 2504234 | A | C | 0.889765 | 0.174765 | 3.56E-07 | 0.889765 | 0.174765 | 3.56E-07 | 1 | 0.0159673 | 9.36E-05 |
| cg06322310 | 1 | PLCH2 | 2436214 | rs734999 | 1 | 2513216 | T | C | 1.01378 | 0.191726 | 1.24E-07 | 1.01378 | 0.191726 | 1.24E-07 | 1 | 0.0125751 | 3.73E-05 |
| cg25037677 | 1 | - | 2437047 | rs60687045 | 1 | 2539603 | A | G | 1.55456 | 0.289411 | 7.83E-08 | 1.55456 | 0.289411 | 7.83E-08 | 1 | 0.00599994 | 2.52E-05 |
| cg24551418 | 1 | - | 2437112 | rs10752745 | 1 | 2507938 | G | A | 0.961515 | 0.184995 | 2.02E-07 | 0.961515 | 0.184995 | 2.02E-07 | 1 | 0.014068 | 5.68E-05 |
| cg12117396 | 1 | - | 2438037 | rs745368 | 1 | 2524205 | T | C | 0.336632 | 0.0591051 | 1.23E-08 | 0.336632 | 0.0591051 | 1.23E-08 | 1 | 0.145211 | 5.17E-06 |
| cg25975165 | 1 | PANK4 | 2444426 | rs4648502 | 1 | 2700117 | G | C | 0.435143 | 0.0972011 | 7.59E-06 | 0.435143 | 0.0972011 | 7.59E-06 | 1 | 0.0504029 | 0.001251142 |
| cg05697909 | 1 | HES5 | 2462364 | rs10752745 | 1 | 2507938 | G | A | 0.760395 | 0.1463 | 2.02E-07 | 0.760395 | 0.1463 | 2.02E-07 | 1 | 0.0225406 | 5.68E-05 |
| cg15678662 | 1 | - | 2465544 | rs10752745 | 1 | 2507938 | G | A | -0.705371 | 0.135713 | 2.02E-07 | -0.705371 | 0.135713 | 2.02E-07 | 1 | 0.0262062 | 5.68E-05 |
| cg06415891 | 1 | - | 2467096 | rs12748553 | 1 | 2704471 | T | C | 0.788148 | 0.175488 | 7.09E-06 | 0.788148 | 0.175488 | 7.09E-06 | 1 | 0.0152724 | 0.001185272 |
| cg20816361 | 1 | - | 2467100 | rs12748553 | 1 | 2704471 | T | C | 0.883362 | 0.196688 | 7.09E-06 | 0.883362 | 0.196688 | 7.09E-06 | 1 | 0.0121427 | 0.001185272 |
| cg01806151 | 1 | - | 2470965 | rs10910096 | 1 | 2512710 | C | T | -0.773747 | 0.147726 | 1.63E-07 | -0.773747 | 0.147726 | 1.63E-07 | 1 | 0.0212448 | 4.71E-05 |
| cg08535779 | 1 | - | 2475961 | rs10752745 | 1 | 2507938 | G | A | -0.962961 | 0.185274 | 2.02E-07 | -0.962961 | 0.185274 | 2.02E-07 | 1 | 0.0140271 | 5.68E-05 |
| cg24593363 | 1 | LOC115110 | 2482848 | rs6671426 | 1 | 2504234 | A | C | -1.18663 | 0.233074 | 3.56E-07 | -1.18663 | 0.233074 | 3.56E-07 | 1 | 0.00894947 | 9.36E-05 |
| cg03988595 | 1 | LOC115110 | 2483933 | rs2985855 | 1 | 2531372 | A | C | -0.98987 | 0.174999 | 1.55E-08 | -0.98987 | 0.174999 | 1.55E-08 | 1 | 0.0166498 | 6.24E-06 |
| cg10220117 | 1 | - | 2501853 | rs10752745 | 1 | 2507938 | G | A | 0.701473 | 0.134963 | 2.02E-07 | 0.701473 | 0.134963 | 2.02E-07 | 1 | 0.0264991 | 5.68E-05 |
| cg13221681 | 1 | - | 2514619 | rs2016366 | 1 | 2513678 | T | A | -1.26517 | 0.239268 | 1.24E-07 | -1.26517 | 0.239268 | 1.24E-07 | 1 | 0.00804616 | 3.73E-05 |
| cg02393107 | 1 | - | 2515692 | rs4445406 | 1 | 2539400 | C | T | 0.403286 | 0.0742078 | 5.51E-08 | 0.403286 | 0.0742078 | 5.51E-08 | 1 | 0.0907498 | 1.86E-05 |
| cg07563069 | 1 | MMEL1 | 2522330 | rs867436 | 1 | 2523723 | T | C | 1.20574 | 0.203246 | 3.00E-09 | 1.20574 | 0.203246 | 3.00E-09 | 1 | 0.0122987 | 1.47E-06 |
| cg24117915 | 1 | MMEL1 | 2523091 | rs4445406 | 1 | 2539400 | C | T | 1.19662 | 0.220187 | 5.51E-08 | 1.19662 | 0.220187 | 5.51E-08 | 1 | 0.0102367 | 1.86E-05 |
| cg10314909 | 1 | MMEL1 | 2524890 | rs6682043 | 1 | 2531514 | C | A | 0.275561 | 0.0489906 | 1.86E-08 | 0.275561 | 0.0489906 | 1.86E-08 | 1 | 0.212821 | 7.31E-06 |
| cg02081327 | 1 | MMEL1 | 2527256 | rs2843402 | 1 | 2528682 | T | C | -1.19564 | 0.211002 | 1.46E-08 | -1.19564 | 0.211002 | 1.46E-08 | 1 | 0.0113533 | 5.92E-06 |
| cg09105687 | 1 | MMEL1 | 2536647 | rs745368 | 1 | 2524205 | T | C | -1.40817 | 0.247243 | 1.23E-08 | -1.40817 | 0.247243 | 1.23E-08 | 1 | 0.00821916 | 5.17E-06 |
| cg22489883 | 1 | MMEL1 | 2537547 | rs4445406 | 1 | 2539400 | C | T | -1.06332 | 0.195659 | 5.51E-08 | -1.06332 | 0.195659 | 5.51E-08 | 1 | 0.0129855 | 1.86E-05 |
| cg04890237 | 1 | MMEL1 | 2537585 | rs78506337 | 1 | 2537095 | A | G | -1.48994 | 0.260318 | 1.05E-08 | -1.48994 | 0.260318 | 1.05E-08 | 1 | 0.00750291 | 4.57E-06 |
| cg17239770 | 1 | MMEL1 | 2540942 | rs4445406 | 1 | 2539400 | C | T | -0.55845 | 0.102759 | 5.51E-08 | -0.55845 | 0.102759 | 5.51E-08 | 1 | 0.0472782 | 1.86E-05 |
| cg21389723 | 1 | MMEL1 | 2541073 | rs6684865 | 1 | 2546229 | A | G | -0.487314 | 0.0895055 | 5.21E-08 | -0.487314 | 0.0895055 | 5.21E-08 | 1 | 0.0637824 | 1.81E-05 |
| cg17843887 | 1 | MMEL1 | 2542359 | rs4445406 | 1 | 2539400 | C | T | -0.487522 | 0.0897079 | 5.51E-08 | -0.487522 | 0.0897079 | 5.51E-08 | 1 | 0.0620736 | 1.86E-05 |
| cg09808235 | 1 | MMEL1 | 2542588 | rs4445406 | 1 | 2539400 | C | T | -0.470164 | 0.0865139 | 5.51E-08 | -0.470164 | 0.0865139 | 5.51E-08 | 1 | 0.0667378 | 1.86E-05 |
| cg24688471 | 1 | MMEL1 | 2542815 | rs4445406 | 1 | 2539400 | C | T | -1.27527 | 0.234659 | 5.51E-08 | -1.27527 | 0.234659 | 5.51E-08 | 1 | 0.00900341 | 1.86E-05 |
| cg12750103 | 1 | MMEL1 | 2559320 | rs60687045 | 1 | 2539603 | A | G | -0.54849 | 0.102112 | 7.83E-08 | -0.54849 | 0.102112 | 7.83E-08 | 1 | 0.0487758 | 2.52E-05 |
| cg23606171 | 1 | MMEL1 | 2559822 | rs41300092 | 1 | 2537838 | T | C | -0.947468 | 0.175402 | 6.62E-08 | -0.947468 | 0.175402 | 6.62E-08 | 1 | 0.0165373 | 2.20E-05 |
| cg20776977 | 1 | MMEL1 | 2564584 | rs10910106 | 1 | 2538886 | T | G | -0.319337 | 0.05998 | 1.02E-07 | -0.319337 | 0.05998 | 1.02E-07 | 1 | 0.142012 | 3.15E-05 |
| cg13941555 | 1 | MMEL1 | 2565265 | rs6424062 | 1 | 2694496 | A | G | -0.819319 | 0.184584 | 9.06E-06 | -0.819319 | 0.184584 | 9.06E-06 | 1 | 0.0143743 | 0.001434732 |
| cg04563718 | 1 | MMEL1 | 2565777 | rs4445406 | 1 | 2539400 | C | T | 0.917771 | 0.168877 | 5.51E-08 | 0.917771 | 0.168877 | 5.51E-08 | 1 | 0.0174581 | 1.86E-05 |
| cg04276316 | 1 | - | 2572242 | rs60687045 | 1 | 2539603 | A | G | 1.09822 | 0.204455 | 7.83E-08 | 1.09822 | 0.204455 | 7.83E-08 | 1 | 0.0121047 | 2.52E-05 |
| cg01560642 | 1 | - | 2574068 | rs4073285 | 1 | 2539796 | T | C | -0.967304 | 0.180223 | 8.01E-08 | -0.967304 | 0.180223 | 8.01E-08 | 1 | 0.0156467 | 2.56E-05 |
| cg18854424 | 1 | - | 2615690 | rs2377041 | 1 | 2713327 | T | C | 0.1479 | 0.0332982 | 8.93E-06 | 0.145586 | 0.0329727 | 1.01E-05 | 2 | 0.436315 | 0.001560635 |
| cg13205528 | 1 | - | 2705849 | rs28568531 | 1 | 2555640 | A | T | 0.605543 | 0.111115 | 5.06E-08 | 0.605543 | 0.111115 | 5.06E-08 | 1 | 0.0412468 | 1.77E-05 |
| cg05442408 | 1 | - | 2706173 | rs10910105 | 1 | 2538209 | A | G | 0.782648 | 0.146615 | 9.41E-08 | 0.782648 | 0.146615 | 9.41E-08 | 1 | 0.0236849 | 2.94E-05 |
| cg00017437 | 1 | - | 2706335 | rs4073285 | 1 | 2539796 | T | C | 0.7463 | 0.139047 | 8.01E-08 | 0.7463 | 0.139047 | 8.01E-08 | 1 | 0.0263383 | 2.56E-05 |
| cg21420674 | 1 | - | 2713926 | rs4445406 | 1 | 2539400 | C | T | 0.648152 | 0.119265 | 5.51E-08 | 0.648152 | 0.119265 | 5.51E-08 | 1 | 0.035084 | 1.86E-05 |
| cg08142858 | 1 | - | 2718742 | rs4445406 | 1 | 2539400 | C | T | -0.982799 | 0.180843 | 5.51E-08 | -0.982799 | 0.180843 | 5.51E-08 | 1 | 0.015214 | 1.86E-05 |
| cg23984035 | 1 | - | 2719864 | rs12748553 | 1 | 2704471 | T | C | 0.473749 | 0.105484 | 7.09E-06 | 0.473749 | 0.105484 | 7.09E-06 | 1 | 0.0423886 | 0.001185272 |
| cg25216300 | 1 | - | 2722739 | rs10797441 | 1 | 2551660 | G | T | 0.364369 | 0.0673367 | 6.28E-08 | 0.364369 | 0.0673367 | 6.28E-08 | 1 | 0.112297 | 2.09E-05 |
| cg05697835 | 1 | - | 2722811 | rs2377041 | 1 | 2713327 | T | C | 0.172899 | 0.0389265 | 8.93E-06 | 0.172899 | 0.0389265 | 8.93E-06 | 1 | 0.308198 | 0.001422705 |
| cg17455297 | 1 | - | 2723217 | rs2377041 | 1 | 2713327 | T | C | 0.265796 | 0.0598414 | 8.93E-06 | 0.265796 | 0.0598414 | 8.93E-06 | 1 | 0.130371 | 0.001422705 |
| cg20744353 | 1 | - | 2724584 | rs10910106 | 1 | 2538886 | T | G | -1.6641 | 0.312562 | 1.02E-07 | -1.6641 | 0.312562 | 1.02E-07 | 1 | 0.00514974 | 3.15E-05 |
| cg10105681 | 1 | - | 2738746 | rs4073285 | 1 | 2539796 | T | C | 0.69222 | 0.128971 | 8.01E-08 | 0.69222 | 0.128971 | 8.01E-08 | 1 | 0.030645 | 2.56E-05 |
| cg03747657 | 1 | - | 2751217 | rs4445406 | 1 | 2539400 | C | T | -1.00114 | 0.184218 | 5.51E-08 | -1.00114 | 0.184218 | 5.51E-08 | 1 | 0.0146587 | 1.86E-05 |
| cg13428681 | 1 | - | 2756210 | rs12024170 | 1 | 2709576 | T | C | -0.690959 | 0.157958 | 1.22E-05 | -0.690959 | 0.157958 | 1.22E-05 | 1 | 0.0187857 | 0.001809904 |
| cg03976856 | 1 | - | 2764669 | rs12731995 | 1 | 2712170 | G | A | 0.430562 | 0.0974758 | 1.00E-05 | 0.441981 | 0.090192 | 9.58E-07 | 2 | 0.0692123 | 0.000225305 |
| cg19817291 | 1 | - | 2766546 | rs4073285 | 1 | 2539796 | T | C | 1.41749 | 0.2641 | 8.01E-08 | 1.41749 | 0.2641 | 8.01E-08 | 1 | 0.00722173 | 2.56E-05 |
| cg13923696 | 1 | - | 2772212 | rs12748553 | 1 | 2704471 | T | C | -0.540728 | 0.120398 | 7.09E-06 | -0.540728 | 0.120398 | 7.09E-06 | 1 | 0.0325205 | 0.001185272 |
| cg03281194 | 1 | - | 2776972 | rs6424062 | 1 | 2694496 | A | G | -0.748856 | 0.168709 | 9.06E-06 | -0.748856 | 0.168709 | 9.06E-06 | 1 | 0.017221 | 0.001434732 |
| cg18163442 | 1 | - | 2779061 | rs6687680 | 1 | 2710002 | A | G | -0.385458 | 0.0865221 | 8.40E-06 | -0.385458 | 0.0865221 | 8.40E-06 | 1 | 0.0623631 | 0.001357464 |
| cg09077530 | 1 | PRDM16 | 3229195 | rs10909923 | 1 | 3221837 | T | C | 0.713933 | 0.21137 | 0.000731209 | 0.713933 | 0.21137 | 0.000731209 | 1 | 0.0177801 | 0.049440892 |
| cg07617129 | 1 | SLC45A1 | 8390291 | rs301806 | 1 | 8482078 | C | T | 0.860351 | 0.232864 | 0.000220248 | 0.860351 | 0.232864 | 0.000220248 | 1 | 0.00881081 | 0.019468917 |
| cg13113737 | 1 | - | 8411074 | rs301806 | 1 | 8482078 | C | T | -0.469535 | 0.127085 | 0.000220248 | -0.469535 | 0.127085 | 0.000220248 | 1 | 0.0297596 | 0.019468917 |
| cg13789457 | 1 | RERE | 8439723 | rs301806 | 1 | 8482078 | C | T | -0.689867 | 0.18672 | 0.000220248 | -0.689867 | 0.18672 | 0.000220248 | 1 | 0.0137461 | 0.019468917 |
| cg17597631 | 1 | RERE | 8443425 | rs301799 | 1 | 8489302 | C | T | -0.649154 | 0.183543 | 0.000405101 | -0.649154 | 0.183543 | 0.000405101 | 1 | 0.0143701 | 0.031528449 |
| cg03610117 | 1 | RERE | 8450231 | rs301807 | 1 | 8484823 | A | G | -0.476375 | 0.129332 | 0.00023025 | -0.476375 | 0.129332 | 0.00023025 | 1 | 0.0286955 | 0.020190414 |
| cg09246103 | 1 | RERE | 8456466 | rs301806 | 1 | 8482078 | C | T | 0.631414 | 0.170899 | 0.000220248 | 0.631414 | 0.170899 | 0.000220248 | 1 | 0.0164142 | 0.019468917 |
| cg19679865 | 1 | RERE | 8467904 | rs301807 | 1 | 8484823 | A | G | -0.930241 | 0.252553 | 0.00023025 | -0.930241 | 0.252553 | 0.00023025 | 1 | 0.00747097 | 0.020190414 |
| cg00786138 | 1 | RERE | 8470722 | rs301806 | 1 | 8482078 | C | T | -0.221431 | 0.0599327 | 0.000220248 | -0.221431 | 0.0599327 | 0.000220248 | 1 | 0.134067 | 0.019468917 |
| cg01447281 | 1 | RERE | 8482689 | rs301806 | 1 | 8482078 | C | T | -0.187293 | 0.0506929 | 0.000220248 | -0.188643 | 0.0502003 | 0.000171472 | 2 | 0.24054 | 0.015912132 |
| cg23843414 | 1 | RERE | 8484310 | rs301806 | 1 | 8482078 | C | T | -1.13359 | 0.306818 | 0.000220248 | -1.13359 | 0.306818 | 0.000220248 | 1 | 0.00504445 | 0.019468917 |
| cg25001161 | 1 | RERE | 8484338 | rs301799 | 1 | 8489302 | C | T | -0.802393 | 0.22687 | 0.000405101 | -0.802393 | 0.22687 | 0.000405101 | 1 | 0.00937984 | 0.031528449 |
| cg00120948 | 1 | RERE | 8484417 | rs301806 | 1 | 8482078 | C | T | -0.177882 | 0.0481459 | 0.000220248 | -0.177882 | 0.0481459 | 0.000220248 | 1 | 0.207788 | 0.019468917 |
| cg13104185 | 1 | RERE | 8509372 | rs1884352 | 1 | 8537289 | G | A | -0.436723 | 0.126646 | 0.000564084 | -0.436723 | 0.126646 | 0.000564084 | 1 | 0.0308972 | 0.040320835 |
| cg17029193 | 1 | RERE | 8510607 | rs7527389 | 1 | 8556545 | A | G | -0.18915 | 0.0520803 | 0.000281427 | -0.193822 | 0.051641 | 0.000174604 | 2 | 0.229383 | 0.016175006 |
| cg13446918 | 1 | RERE | 8599482 | rs4908760 | 1 | 8526142 | G | A | 0.694093 | 0.193477 | 0.000333988 | 0.694093 | 0.193477 | 0.000333988 | 1 | 0.0133304 | 0.027099658 |
| cg04093381 | 1 | - | 9292094 | rs55858522 | 1 | 9296488 | A | G | 0.157887 | 0.0457959 | 0.000565623 | 0.154504 | 0.0427834 | 0.000304744 | 2 | 0.30894 | 0.025167686 |
| cg14418802 | 1 | H6PD | 9299979 | rs56119172 | 1 | 9296479 | G | C | -0.59577 | 0.172902 | 0.000569647 | -0.59577 | 0.172902 | 0.000569647 | 1 | 0.0209669 | 0.040601409 |
| cg18865272 | 1 | H6PD | 9324864 | rs56119172 | 1 | 9296479 | G | C | 0.915787 | 0.265776 | 0.000569647 | 0.915787 | 0.265776 | 0.000569647 | 1 | 0.00879957 | 0.040601409 |
| cg20692268 | 1 | - | 25358981 | rs311426 | 1 | 25358211 | G | A | 0.219739 | 0.0648095 | 0.000697661 | 0.219739 | 0.0648095 | 0.000697661 | 1 | 0.138117 | 0.047702527 |
| cg06577005 | 1 | DHDDS | 26758228 | rs2494391 | 1 | 26798478 | T | C | -0.313501 | 0.0864812 | 0.000288953 | -0.307325 | 0.0821973 | 0.000184904 | 2 | 0.104185 | 0.016935621 |
| cg14254745 | 1 | DHDDS | 26758306 | rs2494391 | 1 | 26798478 | T | C | -0.194913 | 0.053768 | 0.000288953 | -0.186975 | 0.0524698 | 0.000366043 | 2 | 0.261559 | 0.029261255 |
| cg10433052 | 1 | DHDDS | 26795536 | rs11247963 | 1 | 26855401 | A | G | -0.541055 | 0.135746 | 6.73E-05 | -0.541055 | 0.135746 | 6.73E-05 | 1 | 0.0381181 | 0.007420607 |
| cg12729822 | 1 | RPS6KA1 | 26855454 | rs11247963 | 1 | 26855401 | A | G | -0.125655 | 0.0315257 | 6.73E-05 | -0.122433 | 0.0311972 | 8.69E-05 | 2 | 0.732911 | 0.009237037 |
| cg16022904 | 1 | RPS6KA1 | 26870173 | rs80117212 | 1 | 26841794 | T | C | 0.52994 | 0.13153 | 5.60E-05 | 0.51025 | 0.125383 | 4.71E-05 | 2 | 0.0611446 | 0.005589365 |
| cg12742432 | 1 | SYTL1 | 27677860 | rs112854989 | 1 | 26876875 | G | A | 1.88507 | 0.493809 | 0.000134909 | 1.88507 | 0.493809 | 0.000134909 | 1 | 0.00408537 | 0.013175327 |
| cg26721382 | 1 | MATN1 | 31196596 | rs78821281 | 1 | 31181395 | A | G | -1.0549 | 0.245075 | 1.68E-05 | -1.0549 | 0.245075 | 1.68E-05 | 1 | 0.00960002 | 0.002374467 |
| cg01022916 | 1 | MATN1 | 31196938 | rs74765249 | 1 | 31194784 | T | C | -0.578917 | 0.140262 | 3.67E-05 | -0.578917 | 0.140262 | 3.67E-05 | 1 | 0.0306564 | 0.004581606 |
| cg10709350 | 1 | LAPTM5 | 31206669 | rs74765249 | 1 | 31194784 | T | C | 0.139999 | 0.0339195 | 3.67E-05 | 0.137591 | 0.0331284 | 3.28E-05 | 3 | 0.537201 | 0.004163605 |
| cg12654790 | 1 | LAPTM5 | 31231214 | rs10798806 | 1 | 31248562 | A | G | 0.230276 | 0.0648718 | 0.000385746 | 0.230276 | 0.0648718 | 0.000385746 | 1 | 0.110664 | 0.030357163 |
| cg08463932 | 1 | LAPTM5 | 31231488 | rs10798806 | 1 | 31248562 | A | G | 0.189169 | 0.0532915 | 0.000385746 | 0.189169 | 0.0532915 | 0.000385746 | 1 | 0.164012 | 0.030357163 |
| cg08161802 | 1 | SDC3 | 31377381 | rs6656963 | 1 | 31459054 | A | G | -1.10421 | 0.317019 | 0.000495718 | -1.10421 | 0.317019 | 0.000495718 | 1 | 0.00482868 | 0.036763159 |
| cg08136313 | 1 | PRO0611 | 31459731 | rs1999811 | 1 | 31464327 | C | T | 0.389929 | 0.114203 | 0.000639428 | 0.389929 | 0.114203 | 0.000639428 | 1 | 0.0377376 | 0.044530887 |
| cg08849613 | 1 | PUM1 | 31468118 | rs1999810 | 1 | 31464422 | C | T | 0.381546 | 0.111748 | 0.000639428 | 0.381546 | 0.111748 | 0.000639428 | 1 | 0.0394149 | 0.044530887 |
| cg23711166 | 1 | PUM1 | 31504704 | rs1539361 | 1 | 31444200 | A | T | 0.766746 | 0.221171 | 0.000526871 | 0.766746 | 0.221171 | 0.000526871 | 1 | 0.00998548 | 0.038423151 |
| cg16128096 | 1 | HIVEP3 | 42358048 | rs4660602 | 1 | 42555164 | G | A | 0.224202 | 0.0591396 | 0.000150051 | 0.306479 | 0.0813727 | 0.000165694 | 3 | 0.24941 | 0.015500135 |
| cg16145216 | 1 | HIVEP3 | 42385662 | rs3856259 | 1 | 42475503 | T | C | 0.179686 | 0.0763471 | 0.01859552 | 0.252935 | 0.0714151 | 0.00039756 | 3 | 0.455544 | 0.031110863 |
| cg11743000 | 1 | JAK1 | 65355578 | rs1497056 | 1 | 65429851 | C | T | -1.32861 | 0.344948 | 0.000117373 | -1.32861 | 0.344948 | 0.000117373 | 1 | 0.00705341 | 0.011858035 |
| cg09018107 | 1 | IL12RB2 | 67798929 | rs6679356 | 1 | 67820194 | C | T | 2.61974 | 0.155882 | 2.34E-63 | 1.48951 | 0.249857 | 2.51E-09 | 1 | 0.00739715 | 1.26E-06 |
| cg10432846 | 1 | - | 67864963 | rs12757807 | 1 | 67851817 | G | A | 0.538468 | 0.0884747 | 1.16E-09 | 0.538468 | 0.0884747 | 1.16E-09 | 1 | 0.058911 | 6.30E-07 |
| cg24364144 | 1 | SERBP1 | 67875067 | rs12405981 | 1 | 67847843 | T | C | -0.360881 | 0.0597481 | 1.55E-09 | -0.369011 | 0.0586482 | 3.15E-10 | 2 | 0.134532 | 2.01E-07 |
| cg11697983 | 1 | SERBP1 | 67896741 | rs11590963 | 1 | 67906429 | C | A | -1.22754 | 0.168788 | 3.55E-13 | -1.22754 | 0.168788 | 3.55E-13 | 1 | 0.0165374 | 3.74E-10 |
| cg18760173 | 1 | SERBP1 | 67896816 | rs11590963 | 1 | 67906429 | C | A | -1.08827 | 0.149638 | 3.55E-13 | -1.08827 | 0.149638 | 3.55E-13 | 1 | 0.0210618 | 3.74E-10 |
| cg04284321 | 1 | - | 68141209 | rs76267261 | 1 | 68062391 | G | A | -0.598513 | 0.124658 | 1.58E-06 | -0.600418 | 0.112865 | 1.04E-07 | 2 | 0.339405 | 3.22E-05 |
| cg12403142 | 1 | - | 92012408 | rs906241 | 1 | 92012154 | C | A | 0.146885 | 0.045687 | 0.001304495 | 0.204276 | 0.0517667 | 7.95E-05 | 4 | 0.735373 | 0.008583041 |
| cg18803535 | 1 | - | 92015933 | rs11164934 | 1 | 92015267 | T | C | -0.835795 | 0.243711 | 0.000604893 | -0.835795 | 0.243711 | 0.000604893 | 1 | 0.0151105 | 0.042673364 |
| cg26063904 | 1 | - | 101313199 | rs34055952 | 1 | 101309797 | C | T | 0.590781 | 0.139935 | 2.42E-05 | 0.588489 | 0.118021 | 6.16E-07 | 2 | 0.0623975 | 0.000152811 |
| cg19925780 | 1 | - | 101509557 | rs11588568 | 1 | 101426960 | T | C | -0.236545 | 0.0544205 | 1.38E-05 | -0.232699 | 0.0526205 | 9.78E-06 | 2 | 0.428381 | 0.001530117 |
| cg26677431 | 1 | CD58 | 117075710 | rs12141411 | 1 | 117084410 | A | G | 1.4021 | 0.253845 | 3.33E-08 | 1.4021 | 0.253845 | 3.33E-08 | 1 | 0.0215695 | 1.21E-05 |
| cg24346686 | 1 | IL6R | 154377364 | rs7546552 | 1 | 154433905 | C | A | -0.942757 | 0.278018 | 0.000696503 | -0.942757 | 0.278018 | 0.000696503 | 1 | 0.00785802 | 0.047655558 |
| cg01435678 | 1 | IL6R | 154377379 | rs4240872 | 1 | 154436195 | C | T | -0.909954 | 0.258435 | 0.000429988 | -0.909954 | 0.258435 | 0.000429988 | 1 | 0.00899674 | 0.032881289 |
| cg00791854 | 1 | IL6R | 154392070 | rs4240872 | 1 | 154436195 | C | T | -0.415539 | 0.118017 | 0.000429988 | -0.415539 | 0.118017 | 0.000429988 | 1 | 0.0436215 | 0.032881289 |
| cg25135018 | 1 | IL6R | 154435948 | rs4341355 | 1 | 154436404 | C | G | -0.35501 | 0.100957 | 0.000437431 | -0.35501 | 0.100957 | 0.000437431 | 1 | 0.0599436 | 0.033293428 |
| cg01429408 | 1 | - | 156860314 | rs3118644 | 1 | 156863043 | C | T | 0.213631 | 0.063139 | 0.000715777 | 0.213631 | 0.063139 | 0.000715777 | 1 | 0.273162 | 0.048613143 |
| cg09356509 | 1 | PEAR1 | 156862113 | rs3118644 | 1 | 156863043 | C | T | 0.672521 | 0.198765 | 0.000715777 | 0.672521 | 0.198765 | 0.000715777 | 1 | 0.0273956 | 0.048613143 |
| cg22396033 | 1 | PEAR1 | 156862233 | rs3118644 | 1 | 156863043 | C | T | -0.312611 | 0.0923927 | 0.000715777 | -0.312611 | 0.0923927 | 0.000715777 | 1 | 0.127446 | 0.048613143 |
| cg02671646 | 1 | PEAR1 | 156862299 | rs4661066 | 1 | 156861808 | C | A | -0.310683 | 0.0919456 | 0.000727657 | -0.310683 | 0.0919456 | 0.000727657 | 1 | 0.129447 | 0.049254935 |
| cg11594940 | 1 | PEAR1 | 156863360 | rs3118644 | 1 | 156863043 | C | T | 0.342564 | 0.101245 | 0.000715777 | 0.342564 | 0.101245 | 0.000715777 | 1 | 0.10612 | 0.048613143 |
| cg06188545 | 1 | PEAR1 | 156863643 | rs3118644 | 1 | 156863043 | C | T | -0.170024 | 0.0502508 | 0.000715777 | -0.170024 | 0.0502508 | 0.000715777 | 1 | 0.43136 | 0.048613143 |
| cg16268769 | 1 | C1orf92 | 156890782 | rs16837805 | 1 | 156913449 | T | C | -0.192949 | 0.0660599 | 0.003491242 | -0.209822 | 0.059477 | 0.00041914 | 2 | 0.26677 | 0.032234228 |
| cg25149551 | 1 | C1orf92 | 156897062 | rs3118644 | 1 | 156863043 | C | T | 0.672083 | 0.198635 | 0.000715777 | 0.672083 | 0.198635 | 0.000715777 | 1 | 0.0274312 | 0.048613143 |
| cg27578760 | 1 | FCRL5 | 157490623 | rs849830 | 1 | 157534853 | C | T | -0.382327 | 0.113321 | 0.000741336 | -0.382327 | 0.113321 | 0.000741336 | 1 | 0.0366558 | 0.049838046 |
| cg17281600 | 1 | FCRL4 | 157568591 | rs2482481 | 1 | 157634137 | T | G | -0.746527 | 0.149498 | 5.94E-07 | -0.746527 | 0.149498 | 5.94E-07 | 1 | 0.0211268 | 0.000147633 |
| cg07184316 | 1 | FCRL3 | 157669111 | rs3761959 | 1 | 157669278 | T | C | 0.370083 | 0.0660242 | 2.09E-08 | 0.376999 | 0.0642057 | 4.33E-09 | 2 | 0.152403 | 2.07E-06 |
| cg08786003 | 1 | FCRL3 | 157670710 | rs2210913 | 1 | 157668993 | T | C | 0.33655 | 0.0602442 | 2.32E-08 | 0.33655 | 0.0602442 | 2.32E-08 | 1 | 0.128458 | 8.80E-06 |
| cg15602298 | 1 | FCRL3 | 157670825 | rs7528684 | 1 | 157670816 | G | A | 0.538696 | 0.0961562 | 2.12E-08 | 0.538696 | 0.0961562 | 2.12E-08 | 1 | 0.0505283 | 8.13E-06 |
| cg19602479 | 1 | FCRL3 | 157670869 | rs3761959 | 1 | 157669278 | T | C | 0.222801 | 0.0397485 | 2.09E-08 | 0.222801 | 0.0397485 | 2.09E-08 | 1 | 0.294886 | 8.03E-06 |
| cg05384663 | 1 | FCRL3 | 157671386 | rs2225828 | 1 | 157671288 | A | G | 1.3839 | 0.342507 | 5.34E-05 | 1.3839 | 0.342507 | 5.34E-05 | 1 | 0.00693053 | 0.006170919 |
| cg15202552 | 1 | FCRL3 | 157671759 | rs945635 | 1 | 157670290 | G | C | 1.46434 | 0.259116 | 1.60E-08 | 1.46434 | 0.259116 | 1.60E-08 | 1 | 0.00689031 | 6.36E-06 |
| cg05766896 | 1 | FCRL1 | 157789933 | rs945635 | 1 | 157670290 | G | C | -0.778298 | 0.13772 | 1.60E-08 | -0.778298 | 0.13772 | 1.60E-08 | 1 | 0.0245779 | 6.36E-06 |
| cg11139878 | 1 | CD5L | 157811790 | rs10489678 | 1 | 157669668 | A | G | -1.15896 | 0.283069 | 4.24E-05 | -1.15896 | 0.283069 | 4.24E-05 | 1 | 0.0101659 | 0.005126171 |
| cg17112757 | 1 | DENND1B | 197704837 | rs16841912 | 1 | 197702476 | C | G | -1.66327 | 0.204558 | 4.30E-16 | -1.23873 | 0.282533 | 1.16E-05 | 1 | 0.00635081 | 0.001749014 |
| cg22597058 | 1 | DENND1B | 197740882 | rs1998598 | 1 | 197727642 | G | A | -0.790386 | 0.162323 | 1.12E-06 | -0.790386 | 0.162323 | 1.12E-06 | 1 | 0.0195085 | 0.000257273 |
| cg24461171 | 1 | DENND1B | 197745025 | rs4353128 | 1 | 197801928 | G | C | -1.314 | 0.169139 | 8.00E-15 | -1.314 | 0.169139 | 8.00E-15 | 1 | 0.0250606 | 1.11E-11 |
| cg21534578 | 1 | DENND1B | 197745159 | rs1998598 | 1 | 197727642 | G | A | -1.32032 | 0.271157 | 1.12E-06 | -1.32032 | 0.271157 | 1.12E-06 | 1 | 0.00693389 | 0.000257273 |
| cg22487053 | 1 | - | 197757199 | rs76608293 | 1 | 197763418 | G | T | 1.48161 | 0.345333 | 1.78E-05 | 1.48161 | 0.345333 | 1.78E-05 | 1 | 0.00623079 | 0.00249663 |
| cg13060867 | 1 | - | 197768358 | rs1747813 | 1 | 197749669 | C | T | -0.584396 | 0.131105 | 8.30E-06 | -0.584396 | 0.131105 | 8.30E-06 | 1 | 0.043334 | 0.001345687 |
| cg23260502 | 1 | GPR25 | 200841805 | rs7554511 | 1 | 200877562 | A | C | 1.23904 | 0.224522 | 3.43E-08 | 1.23904 | 0.224522 | 3.43E-08 | 1 | 0.0116229 | 1.24E-05 |
| cg18758335 | 1 | GPR25 | 200841861 | rs12131796 | 1 | 200878727 | A | G | 1.22134 | 0.225843 | 6.39E-08 | 1.22134 | 0.225843 | 6.39E-08 | 1 | 0.0114478 | 2.13E-05 |
| cg13300273 | 1 | GPR25 | 200842890 | rs41299637 | 1 | 200877850 | G | T | -0.750722 | 0.137374 | 4.65E-08 | -0.750722 | 0.137374 | 4.65E-08 | 1 | 0.0310582 | 1.63E-05 |
| cg13419869 | 1 | C1orf106 | 200863686 | rs6684083 | 1 | 200673094 | A | G | 0.703005 | 0.247858 | 0.00456378 | 0.632748 | 0.17789 | 0.000375252 | 2 | 0.0161941 | 0.029811021 |
| cg06834507 | 1 | C1orf106 | 200876957 | rs12132298 | 1 | 200875095 | C | T | -1.27206 | 0.227036 | 2.11E-08 | -1.27206 | 0.227036 | 2.11E-08 | 1 | 0.0114578 | 8.12E-06 |
| cg12857074 | 1 | KIF21B | 200975162 | rs12142704 | 1 | 200957697 | G | A | -0.739667 | 0.135662 | 4.98E-08 | -0.739667 | 0.135662 | 4.98E-08 | 1 | 0.0316353 | 1.75E-05 |
| cg25969983 | 1 | KIF21B | 200975291 | rs296563 | 1 | 200944840 | T | G | 1.61282 | 0.312342 | 2.43E-07 | 1.61282 | 0.312342 | 2.43E-07 | 1 | 0.00562476 | 6.69E-05 |
| cg27386431 | 1 | KIF21B | 200990482 | rs1546416 | 1 | 201009556 | G | A | 0.96884 | 0.246893 | 8.71E-05 | 0.96884 | 0.246893 | 8.71E-05 | 1 | 0.0087809 | 0.009245061 |
| cg24731111 | 1 | CACNA1S | 201012098 | rs67602696 | 1 | 201012937 | T | C | -0.509302 | 0.0884421 | 8.51E-09 | -0.509302 | 0.0884421 | 8.51E-09 | 1 | 0.0760123 | 3.91E-06 |
| cg13473505 | 1 | RAB7L1 | 205738393 | rs12752037 | 1 | 205661614 | C | A | -0.472751 | 0.14764 | 0.001364622 | -0.480827 | 0.113164 | 2.15E-05 | 2 | 0.0485401 | 0.002918372 |
| cg17744604 | 1 | IL10 | 206946166 | rs3024505 | 1 | 206939904 | A | G | 1.56999 | 0.333251 | 2.47E-06 | 1.56999 | 0.333251 | 2.47E-06 | 1 | 0.00705301 | 0.000506144 |
| cg14180511 | 1 | IL10 | 206946187 | rs3024505 | 1 | 206939904 | A | G | 1.63404 | 0.346848 | 2.47E-06 | 1.63404 | 0.346848 | 2.47E-06 | 1 | 0.0064825 | 0.000506144 |
| cg16030177 | 1 | IRF6 | 209979111 | rs11582607 | 1 | 209989522 | A | G | 0.111531 | 0.0355885 | 0.001725161 | 0.136667 | 0.0339182 | 5.60E-05 | 4 | 0.856173 | 0.006430298 |
| cg19403323 | 1 | C1orf107 | 210024060 | rs12404886 | 1 | 210001543 | T | A | 0.258675 | 0.0823555 | 0.001684074 | 0.286758 | 0.0783221 | 0.000251034 | 2 | 0.119375 | 0.02149859 |
| cg26562772 | 1 | DUSP10 | 221890431 | rs17491176 | 1 | 221928305 | A | G | 0.197332 | 0.0582731 | 0.000708434 | 0.209516 | 0.0548451 | 0.000133423 | 4 | 0.338897 | 0.013061637 |
| cg24411314 | 1 | DUSP10 | 221914771 | rs17491176 | 1 | 221928305 | A | G | 0.187631 | 0.0554083 | 0.000708434 | 0.195082 | 0.0543153 | 0.000328655 | 2 | 0.329784 | 0.026733842 |
| cg06588802 | 2 | - | 8422236 | rs13416555 | 2 | 8441735 | G | C | -0.882142 | 0.177021 | 6.26E-07 | -0.882142 | 0.177021 | 6.26E-07 | 1 | 0.0182552 | 0.000154988 |
| cg00594040 | 2 | - | 8422258 | rs891058 | 2 | 8442547 | A | G | -1.01655 | 0.202835 | 5.40E-07 | -1.01655 | 0.202835 | 5.40E-07 | 1 | 0.0138894 | 0.000136027 |
| cg15757195 | 2 | - | 8422332 | rs891058 | 2 | 8442547 | A | G | -1.30302 | 0.259995 | 5.40E-07 | -1.30302 | 0.259995 | 5.40E-07 | 1 | 0.00841999 | 0.000136027 |
| cg22834511 | 2 | - | 8423122 | rs6737412 | 2 | 8441484 | C | T | -0.772586 | 0.211991 | 0.00026806 | -0.772586 | 0.211991 | 0.00026806 | 1 | 0.0112051 | 0.022799513 |
| cg26012482 | 2 | - | 8423155 | rs10207297 | 2 | 8440346 | C | T | -0.783275 | 0.21597 | 0.000287053 | -0.783275 | 0.21597 | 0.000287053 | 1 | 0.0107476 | 0.023950638 |
| cg19704902 | 2 | - | 8445893 | rs6737412 | 2 | 8441484 | C | T | -0.124408 | 0.0341364 | 0.00026806 | -0.11643 | 0.0336013 | 0.000530248 | 3 | 0.645231 | 0.038548086 |
| cg08398132 | 2 | - | 8557381 | rs391934 | 2 | 8444494 | T | C | -1.5174 | 0.351275 | 1.56E-05 | -1.5174 | 0.351275 | 1.56E-05 | 1 | 0.00363107 | 0.002235257 |
| cg27598195 | 2 | - | 25148746 | rs10182181 | 2 | 25150296 | G | A | 1.04126 | 0.275479 | 0.000156988 | 1.04126 | 0.275479 | 0.000156988 | 1 | 0.00625281 | 0.014889319 |
| cg22480783 | 2 | - | 25149622 | rs6746013 | 2 | 25143649 | G | C | 0.478138 | 0.129359 | 0.000218905 | 0.478138 | 0.129359 | 0.000218905 | 1 | 0.0292414 | 0.019434934 |
| cg22900681 | 2 | EFR3B | 25301413 | rs522806 | 2 | 25316584 | A | C | -0.268661 | 0.0817639 | 0.001016993 | -0.265789 | 0.0780006 | 0.000655646 | 2 | 0.140044 | 0.045462495 |
| cg10749994 | 2 | DNMT3A | 25474327 | rs11681447 | 2 | 25472784 | C | T | -0.914126 | 0.234181 | 9.48E-05 | -0.914126 | 0.234181 | 9.48E-05 | 1 | 0.0111276 | 0.009971614 |
| cg17742416 | 2 | DNMT3A | 25499619 | rs13428812 | 2 | 25492467 | G | A | 0.636511 | 0.104564 | 1.15E-09 | 0.636511 | 0.104564 | 1.15E-09 | 1 | 0.0471173 | 6.27E-07 |
| cg23009818 | 2 | DNMT3A | 25499764 | rs7583409 | 2 | 25491056 | G | A | 0.721837 | 0.116547 | 5.91E-10 | 0.721837 | 0.116547 | 5.91E-10 | 1 | 0.0382636 | 3.40E-07 |
| cg08485187 | 2 | DNMT3A | 25500046 | rs13428812 | 2 | 25492467 | G | A | 0.48779 | 0.0801323 | 1.15E-09 | 0.48779 | 0.0801323 | 1.15E-09 | 1 | 0.0802896 | 6.27E-07 |
| cg13558695 | 2 | DNMT3A | 25500125 | rs7583409 | 2 | 25491056 | G | A | 0.818056 | 0.132082 | 5.91E-10 | 0.818056 | 0.132082 | 5.91E-10 | 1 | 0.029762 | 3.40E-07 |
| cg08493294 | 2 | DNMT3A | 25500416 | rs7583409 | 2 | 25491056 | G | A | 0.683005 | 0.110277 | 5.91E-10 | 0.683005 | 0.110277 | 5.91E-10 | 1 | 0.0427496 | 3.40E-07 |
| cg10614445 | 2 | DNMT3A | 25526696 | rs6711622 | 2 | 25531350 | A | G | -0.314073 | 0.0599917 | 1.65E-07 | -0.331134 | 0.058586 | 1.59E-08 | 2 | 0.158125 | 6.36E-06 |
| cg02746110 | 2 | DNMT3A | 25552398 | rs4517932 | 2 | 25552070 | C | T | 0.974699 | 0.215834 | 6.31E-06 | 0.974699 | 0.215834 | 6.31E-06 | 1 | 0.00999422 | 0.001083404 |
| cg21629895 | 2 | DNMT3A | 25565795 | rs13034943 | 2 | 25523582 | T | A | -1.42925 | 0.277981 | 2.73E-07 | -1.42925 | 0.277981 | 2.73E-07 | 1 | 0.0125991 | 7.41E-05 |
| cg05102552 | 2 | NRBP1 | 27650867 | rs2303370 | 2 | 27651375 | T | C | 0.13445 | 0.0403126 | 0.000852556 | 0.15783 | 0.0385195 | 4.18E-05 | 4 | 0.417343 | 0.00509571 |
| cg01744354 | 2 | IFT172 | 27712243 | rs780108 | 2 | 27684957 | C | T | -0.219944 | 0.0648581 | 0.000696073 | -0.224976 | 0.0640661 | 0.000445467 | 2 | 0.117051 | 0.033715083 |
| cg06975196 | 2 | SLC4A1AP | 27886066 | rs13021208 | 2 | 27901728 | T | C | 0.372425 | 0.103034 | 0.000300883 | 0.372425 | 0.103034 | 0.000300883 | 1 | 0.0640671 | 0.024886878 |
| cg24413391 | 2 | SLC4A1AP | 27886079 | rs12998770 | 2 | 27913188 | C | T | 0.688408 | 0.186232 | 0.000218649 | 0.688408 | 0.186232 | 0.000218649 | 1 | 0.0193166 | 0.019422851 |
| cg20495819 | 2 | - | 30448529 | rs7579944 | 2 | 30445026 | T | C | 0.332618 | 0.0775932 | 1.81E-05 | 0.332618 | 0.0775932 | 1.81E-05 | 1 | 0.0869981 | 0.002536339 |
| cg04253876 | 2 | LBH | 30453758 | rs6548003 | 2 | 30456082 | G | A | 1.64123 | 0.40871 | 5.93E-05 | 1.64123 | 0.40871 | 5.93E-05 | 1 | 0.00301272 | 0.006747707 |
| cg27117491 | 2 | LOC375196 | 39186743 | rs13011383 | 2 | 38897074 | A | G | -0.982642 | 0.272434 | 0.000309944 | -0.982642 | 0.272434 | 0.000309944 | 1 | 0.0172644 | 0.025506221 |
| cg01585348 | 2 | - | 102862214 | rs67880537 | 2 | 102864106 | G | A | 0.212366 | 0.052512 | 5.25E-05 | 0.222261 | 0.0515222 | 1.61E-05 | 2 | 0.20975 | 0.002286699 |
| cg04744156 | 2 | - | 102865140 | rs12712133 | 2 | 102866273 | A | G | 1.82965 | 0.393159 | 3.26E-06 | 1.82965 | 0.393159 | 3.26E-06 | 1 | 0.00295685 | 0.000629896 |
| cg02648057 | 2 | - | 102867466 | rs55712331 | 2 | 102877181 | T | G | -0.201289 | 0.0579932 | 0.000518798 | -0.197401 | 0.0569401 | 0.000526766 | 2 | 0.138049 | 0.038423151 |
| cg08546494 | 2 | - | 102867826 | rs56389410 | 2 | 102867663 | T | C | 0.949492 | 0.217327 | 1.25E-05 | 0.949492 | 0.217327 | 1.25E-05 | 1 | 0.0108214 | 0.001842993 |
| cg25961567 | 2 | NCK2 | 106363603 | rs62152202 | 2 | 106412069 | A | C | -0.333731 | 0.118672 | 0.004920349 | -0.333873 | 0.0864516 | 0.00011252 | 4 | 0.171679 | 0.011465401 |
| cg20703928 | 2 | NCK2 | 106364229 | rs12465089 | 2 | 106386630 | C | T | -0.778793 | 0.219871 | 0.000397111 | -0.778793 | 0.219871 | 0.000397111 | 1 | 0.009871 | 0.031100682 |
| cg01051524 | 2 | NCK2 | 106415145 | rs4851091 | 2 | 106419117 | T | C | -1.59724 | 0.439559 | 0.000279425 | -1.59724 | 0.439559 | 0.000279425 | 1 | 0.00241927 | 0.023495588 |
| cg17501982 | 2 | NCK2 | 106417701 | rs2047699 | 2 | 106413077 | T | C | -0.281967 | 0.110376 | 0.01063122 | -0.310073 | 0.087637 | 0.000403028 | 3 | 0.318502 | 0.031412367 |
| cg03181966 | 2 | NCK2 | 106493892 | rs12464067 | 2 | 106416112 | G | A | -0.616277 | 0.175932 | 0.000460261 | -0.616277 | 0.175932 | 0.000460261 | 1 | 0.0152979 | 0.034672901 |
| cg10808560 | 2 | NCK2 | 106500430 | rs12476157 | 2 | 106416612 | T | C | -0.779854 | 0.221247 | 0.000423863 | -0.779854 | 0.221247 | 0.000423863 | 1 | 0.0097129 | 0.032504911 |
| cg05208056 | 2 | NCK2 | 106502915 | rs12464067 | 2 | 106416112 | G | A | -0.854837 | 0.244035 | 0.000460261 | -0.854837 | 0.244035 | 0.000460261 | 1 | 0.00791517 | 0.034672901 |
| cg08048687 | 2 | - | 111996799 | rs35565356 | 2 | 111987052 | T | C | -0.856107 | 0.218247 | 8.76E-05 | -0.856107 | 0.218247 | 8.76E-05 | 1 | 0.0125339 | 0.009296111 |
| cg03197992 | 2 | PAX8 | 113990925 | rs74480561 | 2 | 113978906 | T | C | -0.379711 | 0.112302 | 0.000721945 | -0.379711 | 0.112302 | 0.000721945 | 1 | 0.281143 | 0.04893627 |
| cg10717189 | 2 | - | 114735571 | rs13411523 | 2 | 114737694 | G | A | 0.28353 | 0.110244 | 0.01011631 | 0.316334 | 0.091255 | 0.000527409 | 2 | 0.0712306 | 0.038445121 |
| cg17319374 | 2 | TMEM163 | 135476880 | rs6752536 | 2 | 135467498 | C | G | 0.415048 | 0.0957301 | 1.45E-05 | 0.415048 | 0.0957301 | 1.45E-05 | 1 | 0.108597 | 0.002090644 |
| cg25476312 | 2 | TMEM163 | 135476893 | rs71417530 | 2 | 135448651 | G | A | -1.38171 | 0.267187 | 2.33E-07 | -1.38171 | 0.267187 | 2.33E-07 | 1 | 0.0151589 | 6.43E-05 |
| cg15297650 | 2 | TMEM163 | 135477056 | rs17733977 | 2 | 135470056 | A | G | 0.265887 | 0.058612 | 5.73E-06 | 0.265887 | 0.058612 | 5.73E-06 | 1 | 0.29806 | 0.000994261 |
| cg02998028 | 2 | ACMSD | 135621153 | rs11682346 | 2 | 135388261 | G | A | -0.446634 | 0.08036 | 2.74E-08 | -0.446634 | 0.08036 | 2.74E-08 | 1 | 0.0838948 | 1.02E-05 |
| cg01148193 | 2 | CCNT2 | 135675773 | rs17321713 | 2 | 135480363 | T | C | 0.3275 | 0.0744062 | 1.08E-05 | 0.314232 | 0.0674069 | 3.14E-06 | 2 | 0.206374 | 0.000608749 |
| cg15893373 | 2 | CCNT2 | 135677154 | rs6747870 | 2 | 135469769 | G | A | 0.865919 | 0.200689 | 1.60E-05 | 0.865919 | 0.200689 | 1.60E-05 | 1 | 0.0245885 | 0.002283712 |
| cg15546071 | 2 | CCNT2 | 135691756 | rs28788021 | 2 | 135460632 | A | T | -1.33994 | 0.288442 | 3.40E-06 | -1.33994 | 0.288442 | 3.40E-06 | 1 | 0.011143 | 0.000650276 |
| cg22011316 | 2 | GTDC1 | 144996219 | rs10191725 | 2 | 144960783 | T | C | 0.730064 | 0.179092 | 4.57E-05 | 0.730064 | 0.179092 | 4.57E-05 | 1 | 0.0473058 | 0.005461306 |
| cg11309696 | 2 | HIBCH | 191183734 | rs77225909 | 2 | 191197972 | A | G | 1.56001 | 0.234757 | 3.04E-11 | 1.34572 | 0.231466 | 6.12E-09 | 1 | 0.0151084 | 2.87E-06 |
| cg07158040 | 2 | HIBCH | 191185285 | rs59696237 | 2 | 191195863 | G | A | -1.20159 | 0.191551 | 3.56E-10 | -1.20159 | 0.191551 | 3.56E-10 | 1 | 0.0226289 | 2.22E-07 |
| cg15998761 | 2 | MFSD6 | 191300784 | rs13391723 | 2 | 191330162 | A | G | -1.17849 | 0.208522 | 1.59E-08 | -1.17849 | 0.208522 | 1.59E-08 | 1 | 0.011706 | 6.36E-06 |
| cg18008221 | 2 | TMEM194B | 191395606 | rs4343493 | 2 | 191322272 | C | G | -0.870223 | 0.111821 | 7.19E-15 | -0.870223 | 0.111821 | 7.19E-15 | 1 | 0.0446529 | 1.00E-11 |
| cg20818283 | 2 | TMEM194B | 191399100 | rs6742904 | 2 | 191313902 | G | T | -0.312299 | 0.0405321 | 1.32E-14 | -0.312299 | 0.0405321 | 1.32E-14 | 1 | 0.334566 | 1.77E-11 |
| cg17118478 | 2 | NAB1 | 191543902 | rs4853515 | 2 | 191552575 | C | A | -0.328592 | 0.0338564 | 2.91E-22 | -0.345305 | 0.0606633 | 1.26E-08 | 4 | 1.02222 | 5.26E-06 |
| cg18766080 | 2 | STAT1 | 191879342 | rs1517352 | 2 | 191931464 | A | C | -0.963022 | 0.221095 | 1.33E-05 | -0.963022 | 0.221095 | 1.33E-05 | 1 | 0.00972613 | 0.001928318 |
| cg17648076 | 2 | - | 191888150 | rs7558921 | 2 | 191888224 | C | G | 0.1372 | 0.0416418 | 0.000985181 | 0.136047 | 0.0399752 | 0.000665926 | 3 | 0.757898 | 0.045959079 |
| cg18155840 | 2 | STAT4 | 192015918 | rs13022931 | 2 | 192020729 | G | A | 0.510496 | 0.130807 | 9.52E-05 | 0.510496 | 0.130807 | 9.52E-05 | 1 | 0.102143 | 0.009999495 |
| cg01004382 | 2 | STAT4 | 192015996 | rs4853457 | 2 | 191933689 | T | A | 0.520773 | 0.184471 | 0.004756802 | 0.696439 | 0.139788 | 6.30E-07 | 2 | 0.0619818 | 0.000155678 |
| cg07588439 | 2 | MARS2 | 198571554 | rs771013 | 2 | 198625237 | G | A | 0.538794 | 0.156333 | 0.000568112 | 0.538794 | 0.156333 | 0.000568112 | 1 | 0.0202931 | 0.040572936 |
| cg02833180 | 2 | PLCL1 | 198815064 | rs6732340 | 2 | 198912952 | C | G | -0.424621 | 0.115492 | 0.000236415 | -0.424621 | 0.115492 | 0.000236415 | 1 | 0.0366502 | 0.020605829 |
| cg27609819 | 2 | PLCL1 | 198816177 | rs6732340 | 2 | 198912952 | C | G | -0.610565 | 0.166067 | 0.000236415 | -0.610565 | 0.166067 | 0.000236415 | 1 | 0.0176873 | 0.020605829 |
| cg09349723 | 2 | PLCL1 | 199013270 | rs6732340 | 2 | 198912952 | C | G | -0.36228 | 0.0985364 | 0.000236415 | -0.36228 | 0.0985364 | 0.000236415 | 1 | 0.0503778 | 0.020605829 |
| cg22572158 | 2 | CTLA4 | 204731068 | rs13033315 | 2 | 204706865 | T | A | 0.83283 | 0.200916 | 3.40E-05 | 0.83283 | 0.200916 | 3.40E-05 | 1 | 0.01195 | 0.004283264 |
| cg09488200 | 2 | - | 213781204 | rs17355973 | 2 | 213877075 | T | C | -0.788049 | 0.227148 | 0.000521877 | -0.788049 | 0.227148 | 0.000521877 | 1 | 0.0125663 | 0.038132833 |
| cg23901212 | 2 | - | 228632807 | rs13024444 | 2 | 228653164 | C | T | 0.818989 | 0.179814 | 5.25E-06 | 0.629996 | 0.172237 | 0.000254525 | 2 | 0.0313017 | 0.021763087 |
| cg19507677 | 2 | - | 228670508 | rs11690054 | 2 | 228657853 | G | A | -0.339854 | 0.0771211 | 1.05E-05 | -0.339854 | 0.0771211 | 1.05E-05 | 1 | 0.0805383 | 0.001604619 |
| cg21643045 | 2 | CCL20 | 228678693 | rs11690054 | 2 | 228657853 | G | A | -0.727449 | 0.165076 | 1.05E-05 | -0.727449 | 0.165076 | 1.05E-05 | 1 | 0.0175202 | 0.001604619 |
| cg15063366 | 2 | - | 228683032 | rs11690054 | 2 | 228657853 | G | A | -0.630174 | 0.143002 | 1.05E-05 | -0.630174 | 0.143002 | 1.05E-05 | 1 | 0.0233719 | 0.001604619 |
| cg21761922 | 3 | OXNAD1 | 16309088 | rs538525 | 3 | 16376279 | T | C | -0.371988 | 0.103164 | 0.000311293 | -0.371988 | 0.103164 | 0.000311293 | 1 | 0.0431738 | 0.025565268 |
| cg10295937 | 3 | RFTN1 | 16369004 | rs689675 | 3 | 16373870 | A | T | 1.20915 | 0.345424 | 0.000464522 | 1.20915 | 0.345424 | 0.000464522 | 1 | 0.00381984 | 0.034896601 |
| cg10790470 | 3 | - | 16592588 | rs538525 | 3 | 16376279 | T | C | 0.978144 | 0.271271 | 0.000311293 | 0.978144 | 0.271271 | 0.000311293 | 1 | 0.00618188 | 0.025565268 |
| cg21497139 | 3 | - | 16852000 | rs6773869 | 3 | 16870340 | G | A | -0.767926 | 0.215789 | 0.000372782 | -0.767926 | 0.215789 | 0.000372782 | 1 | 0.0110278 | 0.029697405 |
| cg20942097 | 3 | PLCL2 | 16957609 | rs2881771 | 3 | 16951650 | T | A | -1.25209 | 0.195567 | 1.54E-10 | -1.25209 | 0.195567 | 1.54E-10 | 1 | 0.0130122 | 1.07E-07 |
| cg16503724 | 3 | PLCL2 | 17130667 | rs13077235 | 3 | 17126825 | T | C | -0.687344 | 0.128006 | 7.91E-08 | -0.687344 | 0.128006 | 7.91E-08 | 1 | 0.0500682 | 2.54E-05 |
| cg02923856 | 3 | NR1D2 | 23989124 | rs9862416 | 3 | 23987842 | G | A | -0.406956 | 0.103531 | 8.47E-05 | -0.406956 | 0.103531 | 8.47E-05 | 1 | 0.0480814 | 0.009035517 |
| cg25979180 | 3 | LOC152024 | 24144892 | rs6807599 | 3 | 24145588 | G | T | 0.475435 | 0.139672 | 0.000664308 | 0.475435 | 0.139672 | 0.000664308 | 1 | 0.0364146 | 0.04586698 |
| cg00902374 | 3 | - | 25461111 | rs1351783 | 3 | 25409319 | A | C | 1.40119 | 0.311992 | 7.09E-06 | 1.40119 | 0.311992 | 7.09E-06 | 1 | 0.00472319 | 0.001185272 |
| cg12924224 | 3 | CCR8 | 39374587 | rs3772144 | 3 | 39448424 | C | T | 0.337912 | 0.0994017 | 0.000675308 | 0.337912 | 0.0994017 | 0.000675308 | 1 | 0.0498079 | 0.046547127 |
| cg26410105 | 3 | SLC25A38 | 39425775 | rs71325528 | 3 | 39441963 | A | C | 0.452717 | 0.133849 | 0.000718896 | 0.452717 | 0.133849 | 0.000718896 | 1 | 0.0279356 | 0.048804535 |
| cg10639933 | 3 | SLC25A38 | 39426101 | rs7611864 | 3 | 39447504 | G | C | -0.206111 | 0.0606185 | 0.000673631 | -0.204545 | 0.0596726 | 0.000608631 | 2 | 0.203794 | 0.042855942 |
| cg17944282 | 3 | RPSA | 39448217 | rs3772146 | 3 | 39448204 | T | C | 0.155988 | 0.0442496 | 0.000423257 | 0.155988 | 0.0442496 | 0.000423257 | 1 | 0.249226 | 0.03248916 |
| cg16361947 | 3 | RPSA | 39451847 | rs71325529 | 3 | 39450393 | T | C | 0.204705 | 0.0604258 | 0.000704906 | 0.204705 | 0.0604258 | 0.000704906 | 1 | 0.136367 | 0.048076229 |
| cg27294008 | 3 | NEK4 | 52748359 | rs6445534 | 3 | 52743384 | A | G | 0.0736491 | 0.0263543 | 0.005196871 | 0.0961476 | 0.0267473 | 0.000324881 | 4 | 1.02139 | 0.026506342 |
| cg18342703 | 3 | FOXP1 | 71499629 | rs36023390 | 3 | 71523093 | T | C | -0.876907 | 0.213158 | 3.89E-05 | -0.876907 | 0.213158 | 3.89E-05 | 1 | 0.0112859 | 0.004817378 |
| cg09611620 | 3 | FOXP1 | 71545533 | rs9819066 | 3 | 71523110 | T | C | 0.456043 | 0.110849 | 3.89E-05 | 0.456043 | 0.110849 | 3.89E-05 | 1 | 0.0419009 | 0.004816684 |
| cg23051926 | 3 | CBLB | 105466016 | rs894937 | 3 | 105442953 | C | T | -0.112692 | 0.0363063 | 0.001909807 | -0.123208 | 0.0354946 | 0.00051827 | 3 | 0.534016 | 0.038018292 |
| cg25937790 | 3 | CDGAP | 119114849 | rs11922594 | 3 | 119125822 | T | C | 0.615318 | 0.108101 | 1.26E-08 | 0.620487 | 0.101902 | 1.14E-09 | 3 | 0.10137 | 6.24E-07 |
| cg26519339 | 3 | TMEM39A | 119182753 | rs13094625 | 3 | 119152065 | C | G | 1.03878 | 0.185577 | 2.18E-08 | 1.03878 | 0.185577 | 2.18E-08 | 1 | 0.0196121 | 8.33E-06 |
| cg12184221 | 3 | TMEM39A | 119182840 | rs7650774 | 3 | 119205050 | C | T | 1.24983 | 0.128706 | 2.76E-22 | 1.24983 | 0.128706 | 2.76E-22 | 1 | 0.0523887 | 1.04E-18 |
| cg07890553 | 3 | TMEM39A | 119182858 | rs3732421 | 3 | 119150089 | G | A | 1.00002 | 0.103643 | 5.07E-22 | 1.00002 | 0.103643 | 5.07E-22 | 1 | 0.0795874 | 1.79E-18 |
| cg21073650 | 3 | PLA1A | 119315354 | rs62264533 | 3 | 119315456 | A | G | -0.424101 | 0.144421 | 0.00331884 | -0.426147 | 0.113847 | 0.000181779 | 2 | 0.264064 | 0.016696572 |
| cg19699682 | 3 | - | 119349840 | rs17203235 | 3 | 119355411 | T | C | 0.470194 | 0.114688 | 4.14E-05 | 0.470194 | 0.114688 | 4.14E-05 | 1 | 0.0390574 | 0.005053459 |
| cg01322951 | 3 | COX17 | 119395580 | rs11923223 | 3 | 119390590 | A | G | -0.345724 | 0.0859228 | 5.73E-05 | -0.345724 | 0.0859228 | 5.73E-05 | 1 | 0.0697439 | 0.006558893 |
| cg12704673 | 3 | COX17 | 119395842 | rs1124723 | 3 | 119409489 | G | A | 0.855802 | 0.23 | 0.000198592 | 0.855802 | 0.23 | 0.000198592 | 1 | 0.00998646 | 0.017966047 |
| cg03266992 | 3 | GOLGB1 | 121468852 | rs9289173 | 3 | 121358697 | T | C | 1.08331 | 0.255049 | 2.16E-05 | 1.08331 | 0.255049 | 2.16E-05 | 1 | 0.010003 | 0.002932686 |
| cg18861827 | 3 | GOLGB1 | 121469168 | rs6791896 | 3 | 121373111 | T | C | 0.542696 | 0.129131 | 2.64E-05 | 0.542696 | 0.129131 | 2.64E-05 | 1 | 0.0389186 | 0.003484689 |
| cg21792134 | 3 | IQCB1 | 121491382 | rs9864907 | 3 | 121371063 | T | C | 0.668122 | 0.158803 | 2.59E-05 | 0.668122 | 0.158803 | 2.59E-05 | 1 | 0.0257156 | 0.003429075 |
| cg27374758 | 3 | - | 121675259 | rs9815649 | 3 | 121619119 | C | T | 1.88426 | 0.376103 | 5.45E-07 | 1.71238 | 0.379863 | 6.55E-06 | 1 | 0.00472228 | 0.001118298 |
| cg00697440 | 3 | CD86 | 121795768 | rs2332095 | 3 | 121754332 | A | C | 0.461288 | 0.126489 | 0.000265519 | 0.461288 | 0.126489 | 0.000265519 | 1 | 0.0458375 | 0.022619658 |
| cg25611254 | 3 | SLC12A8 | 124931985 | rs13315685 | 3 | 124921824 | T | C | 0.186839 | 0.0480667 | 0.0001015 | 0.202644 | 0.0499193 | 4.92E-05 | 3 | 0.25993 | 0.005806996 |
| cg25260865 | 3 | SLC12A8 | 124932002 | rs13315685 | 3 | 124921824 | T | C | 0.192297 | 0.0494709 | 0.0001015 | 0.210649 | 0.0457954 | 4.23E-06 | 4 | 0.291013 | 0.000789813 |
| cg05779990 | 3 | C3orf27 | 128292593 | rs9849126 | 3 | 128312069 | C | T | -0.214871 | 0.0703155 | 0.002244673 | -0.236976 | 0.0667863 | 0.000387838 | 2 | 0.121539 | 0.030447998 |
| cg08448284 | 3 | ATP2C1 | 130652221 | rs9811392 | 3 | 130770036 | G | A | 0.24131 | 0.0687906 | 0.000451772 | 0.24131 | 0.0687906 | 0.000451772 | 1 | 0.102987 | 0.034096828 |
| cg00876667 | 3 | - | 137497598 | rs78403993 | 3 | 137424493 | T | C | 0.780846 | 0.224614 | 0.000508312 | 0.738291 | 0.217377 | 0.000682973 | 2 | 0.0550417 | 0.046935772 |
| cg00217306 | 3 | TFDP2 | 141681567 | rs13065446 | 3 | 141737842 | C | T | 0.362899 | 0.0827067 | 1.15E-05 | 0.366451 | 0.0808127 | 5.78E-06 | 2 | 0.0854407 | 0.001001529 |
| cg02748419 | 3 | - | 141868612 | rs73236005 | 3 | 141839324 | T | A | -0.359807 | 0.114543 | 0.001682464 | -0.350066 | 0.0944615 | 0.000210693 | 4 | 0.22879 | 0.018860814 |
| cg03656167 | 3 | SCHIP1 | 159327290 | rs9812406 | 3 | 159413737 | T | C | -0.742345 | 0.199062 | 0.000192133 | -0.742345 | 0.199062 | 0.000192133 | 1 | 0.0218234 | 0.017440068 |
| cg00975624 | 3 | - | 159646501 | rs9822099 | 3 | 159635448 | T | C | -0.391925 | 0.106622 | 0.000237129 | -0.391925 | 0.106622 | 0.000237129 | 1 | 0.0428415 | 0.020650175 |
| cg14995416 | 3 | IL12A | 159713351 | rs568408 | 3 | 159713467 | A | G | 1.63531 | 0.18825 | 3.77E-18 | 1.31976 | 0.20179 | 6.17E-11 | 1 | 0.0232634 | 4.93E-08 |
| cg04855961 | 3 | - | 159719849 | rs6792711 | 3 | 159642119 | A | G | -1.02518 | 0.27832 | 0.000230153 | -1.02518 | 0.27832 | 0.000230153 | 1 | 0.00623201 | 0.020190414 |
| cg22878441 | 3 | - | 159756648 | rs1075498 | 3 | 159756451 | A | G | 1.18054 | 0.140391 | 4.19E-17 | 1.18054 | 0.140391 | 4.19E-17 | 1 | 0.0288759 | 9.98E-14 |
| cg15998779 | 3 | - | 159756690 | rs1075498 | 3 | 159756451 | A | G | 1.0354 | 0.123131 | 4.19E-17 | 1.0354 | 0.123131 | 4.19E-17 | 1 | 0.0375653 | 9.98E-14 |
| cg06710704 | 3 | - | 159778596 | rs17810546 | 3 | 159665050 | G | A | 1.8431 | 0.157043 | 8.55E-32 | 1.24491 | 0.148046 | 4.19E-17 | 1 | 0.0259484 | 9.98E-14 |
| cg20217449 | 3 | TRIM59 | 160154877 | rs1920663 | 3 | 160304350 | G | A | -1.52797 | 0.221009 | 4.75E-12 | -1.43873 | 0.233656 | 7.42E-10 | 1 | 0.0109481 | 4.18E-07 |
| cg07553761 | 3 | TRIM59 | 160167977 | rs13072556 | 3 | 160401027 | A | C | 0.974998 | 0.123431 | 2.84E-15 | 0.974998 | 0.123431 | 2.84E-15 | 1 | 0.0460969 | 4.60E-12 |
| cg15618978 | 3 | TRIM59 | 160167990 | rs13072556 | 3 | 160401027 | A | C | 0.953664 | 0.12073 | 2.84E-15 | 0.953664 | 0.12073 | 2.84E-15 | 1 | 0.0481746 | 4.60E-12 |
| cg22064048 | 3 | TRIM59 | 160168922 | rs60009222 | 3 | 160063356 | A | C | -0.71223 | 0.18066 | 8.07E-05 | -0.71223 | 0.18066 | 8.07E-05 | 1 | 0.0150929 | 0.008690751 |
| cg13027369 | 3 | KPNA4 | 160279320 | rs9798898 | 3 | 160082154 | A | G | 0.488746 | 0.128368 | 0.000140498 | 0.488746 | 0.128368 | 0.000140498 | 1 | 0.0299262 | 0.013647417 |
| cg20378687 | 3 | KPNA4 | 160281681 | rs11721112 | 3 | 160289284 | C | T | 0.267481 | 0.0376081 | 1.15E-12 | 0.376006 | 0.1106 | 0.000674693 | 4 | 0.685448 | 0.046524517 |
| cg18996776 | 3 | KPNA4 | 160284003 | rs60009222 | 3 | 160063356 | A | C | 1.1799 | 0.299286 | 8.07E-05 | 1.1799 | 0.299286 | 8.07E-05 | 1 | 0.00545283 | 0.008690751 |
| cg21832142 | 3 | - | 160334793 | rs60009222 | 3 | 160063356 | A | C | -0.285255 | 0.0723562 | 8.07E-05 | -0.285255 | 0.0723562 | 8.07E-05 | 1 | 0.0944755 | 0.008690751 |
| cg24147596 | 3 | ARL14 | 160395420 | rs7610939 | 3 | 160393545 | A | T | -0.552203 | 0.0856625 | 1.15E-10 | -0.552203 | 0.0856625 | 1.15E-10 | 1 | 0.0773024 | 8.34E-08 |
| cg24345902 | 3 | - | 160414617 | rs16831361 | 3 | 160414759 | A | G | 0.768571 | 0.184365 | 3.06E-05 | 0.768571 | 0.184365 | 3.06E-05 | 1 | 0.0154415 | 0.003949253 |
| cg21592091 | 3 | - | 160427542 | rs16831361 | 3 | 160414759 | A | G | 1.44503 | 0.346634 | 3.06E-05 | 1.44503 | 0.346634 | 3.06E-05 | 1 | 0.00431293 | 0.003949253 |
| cg04132452 | 3 | PPM1L | 160475035 | rs1915929 | 3 | 160514100 | T | G | -0.466377 | 0.137904 | 0.000719962 | -0.466377 | 0.137904 | 0.000719962 | 1 | 0.031693 | 0.04883601 |
| cg04056576 | 3 | PPM1L | 160475090 | rs1915929 | 3 | 160514100 | T | G | -0.53653 | 0.158647 | 0.000719962 | -0.53653 | 0.158647 | 0.000719962 | 1 | 0.0239258 | 0.04883601 |
| cg00383977 | 3 | EIF2B5 | 183852781 | rs111427065 | 3 | 183868861 | A | G | 0.580836 | 0.166654 | 0.000491723 | 0.580836 | 0.166654 | 0.000491723 | 1 | 0.0316329 | 0.03655053 |
| cg05629195 | 3 | ABCF3 | 183903129 | rs73185743 | 3 | 183912194 | T | C | 1.48155 | 0.424989 | 0.000490238 | 1.48155 | 0.424989 | 0.000490238 | 1 | 0.00469906 | 0.036456819 |
| cg10159923 | 4 | GAK | 861224 | rs2279177 | 4 | 852659 | G | T | 0.829342 | 0.222551 | 0.000194199 | 0.829342 | 0.222551 | 0.000194199 | 1 | 0.0121886 | 0.017607937 |
| cg09151583 | 4 | GAK | 881283 | rs62297079 | 4 | 879977 | A | G | -0.598657 | 0.120923 | 7.40E-07 | -0.598657 | 0.120923 | 7.40E-07 | 1 | 0.0397107 | 0.000178368 |
| cg01437235 | 4 | TMEM175 | 939027 | rs6813110 | 4 | 942660 | T | C | 0.182859 | 0.0353002 | 2.22E-07 | 0.157431 | 0.0404293 | 9.87E-05 | 3 | 0.479577 | 0.010331626 |
| cg09279566 | 4 | TMEM175 | 939162 | rs6813110 | 4 | 942660 | T | C | 0.131809 | 0.0254452 | 2.22E-07 | 0.100507 | 0.0245424 | 4.22E-05 | 6 | 1.51855 | 0.0051195 |
| cg09216008 | 4 | TMEM175 | 939597 | rs6813110 | 4 | 942660 | T | C | 0.494825 | 0.0955236 | 2.22E-07 | 0.494825 | 0.0955236 | 2.22E-07 | 1 | 0.0544717 | 6.16E-05 |
| cg20814179 | 4 | TMEM175 | 940893 | rs6813110 | 4 | 942660 | T | C | 0.127563 | 0.0246255 | 2.22E-07 | 0.10297 | 0.02347 | 1.15E-05 | 8 | 1.69537 | 0.00173373 |
| cg08222618 | 4 | TMEM175 | 941054 | rs6813110 | 4 | 942660 | T | C | 0.124407 | 0.0240162 | 2.22E-07 | 0.122741 | 0.0361581 | 0.000687489 | 9 | 2.02379 | 0.047146202 |
| cg10941006 | 4 | TMEM175 | 942705 | rs11729289 | 4 | 939206 | A | G | 1.83601 | 0.363266 | 4.33E-07 | 1.88687 | 0.425003 | 9.02E-06 | 1 | 0.0027503 | 0.001434721 |
| cg06595176 | 4 | TMEM175 | 943562 | rs6815138 | 4 | 941290 | C | A | 1.02348 | 0.218282 | 2.75E-06 | 1.02348 | 0.218282 | 2.75E-06 | 1 | 0.00960159 | 0.000553356 |
| cg00495574 | 4 | TMEM175 | 943597 | rs2290403 | 4 | 942006 | A | G | -1.37307 | 0.27229 | 4.60E-07 | -1.37307 | 0.27229 | 4.60E-07 | 1 | 0.00675674 | 0.000117754 |
| cg01242123 | 4 | TMEM175 | 944277 | rs2290404 | 4 | 945225 | G | A | 0.783264 | 0.183058 | 1.88E-05 | 0.783264 | 0.183058 | 1.88E-05 | 1 | 0.0139919 | 0.002619184 |
| cg04409981 | 4 | TMEM175 | 948910 | rs10008187 | 4 | 941017 | T | C | 1.35201 | 0.255651 | 1.24E-07 | 1.35201 | 0.255651 | 1.24E-07 | 1 | 0.00741923 | 3.73E-05 |
| cg23092788 | 4 | TMEM175 | 949558 | rs62297079 | 4 | 879977 | A | G | -1.38527 | 0.279812 | 7.40E-07 | -1.38527 | 0.279812 | 7.40E-07 | 1 | 0.00733838 | 0.000178368 |
| cg25403803 | 4 | DGKQ | 955905 | rs6815138 | 4 | 941290 | C | A | 1.27415 | 0.271743 | 2.75E-06 | 1.27415 | 0.271743 | 2.75E-06 | 1 | 0.00616547 | 0.000553356 |
| cg05178683 | 4 | DGKQ | 958773 | rs6815138 | 4 | 941290 | C | A | 0.289754 | 0.061797 | 2.75E-06 | 0.289754 | 0.061797 | 2.75E-06 | 1 | 0.120727 | 0.000553356 |
| cg06494872 | 4 | DGKQ | 959128 | rs10008187 | 4 | 941017 | T | C | 0.567862 | 0.107377 | 1.24E-07 | 0.567862 | 0.107377 | 1.24E-07 | 1 | 0.042479 | 3.73E-05 |
| cg05804872 | 4 | DGKQ | 960309 | rs11729289 | 4 | 939206 | A | G | 1.32722 | 0.2626 | 4.33E-07 | 1.32722 | 0.2626 | 4.33E-07 | 1 | 0.00717411 | 0.000111773 |
| cg00788025 | 4 | DGKQ | 962749 | rs6813110 | 4 | 942660 | T | C | 0.887524 | 0.171332 | 2.22E-07 | 0.887524 | 0.171332 | 2.22E-07 | 1 | 0.0168758 | 6.16E-05 |
| cg24226891 | 4 | SLC26A1 | 979331 | rs6815138 | 4 | 941290 | C | A | 0.657093 | 0.140141 | 2.75E-06 | 0.657093 | 0.140141 | 2.75E-06 | 1 | 0.0234079 | 0.000553356 |
| cg16817180 | 4 | IDUA | 981485 | rs6842493 | 4 | 914638 | C | T | 0.811404 | 0.183499 | 9.79E-06 | 0.811404 | 0.183499 | 9.79E-06 | 1 | 0.01518 | 0.001531252 |
| cg03341233 | 4 | IDUA | 993066 | rs6815138 | 4 | 941290 | C | A | 1.24515 | 0.265558 | 2.75E-06 | 1.24515 | 0.265558 | 2.75E-06 | 1 | 0.00645868 | 0.000553356 |
| cg00810208 | 4 | IDUA | 997012 | rs3755954 | 4 | 994452 | T | C | 0.993732 | 0.263872 | 0.000165959 | 0.993732 | 0.263872 | 0.000165959 | 1 | 0.0095399 | 0.015507038 |
| cg18619267 | 4 | AFAP1 | 7940375 | rs6814219 | 4 | 7869957 | C | G | 0.204041 | 0.0819987 | 0.01283412 | 0.216474 | 0.06417 | 0.00074246 | 3 | 0.141963 | 0.049856677 |
| cg14692106 | 4 | AFAP1 | 7940389 | rs7378072 | 4 | 7867243 | A | G | 0.318635 | 0.126167 | 0.01155355 | 0.316511 | 0.0928352 | 0.000651188 | 2 | 0.0776024 | 0.045269573 |
| cg15957394 | 4 | AFAP1 | 7941823 | rs7378072 | 4 | 7867243 | A | G | 0.190134 | 0.0752857 | 0.01155355 | 0.218054 | 0.0611041 | 0.000359027 | 4 | 0.164191 | 0.0287998 |
| cg23866381 | 4 | TBC1D1 | 38132555 | rs676461 | 4 | 38116742 | A | T | -0.76339 | 0.204689 | 0.000191912 | -0.76339 | 0.204689 | 0.000191912 | 1 | 0.0118819 | 0.017429784 |
| cg14975958 | 4 | - | 38163323 | rs630428 | 4 | 38121363 | A | G | 1.09037 | 0.292311 | 0.000191407 | 1.09037 | 0.292311 | 0.000191407 | 1 | 0.00576344 | 0.017403428 |
| cg22767754 | 4 | NIPAL1 | 48038871 | rs56001502 | 4 | 48034884 | T | C | -0.969521 | 0.258544 | 0.000176939 | -0.969521 | 0.258544 | 0.000176939 | 1 | 0.0177849 | 0.01632319 |
| cg13603533 | 4 | - | 48045040 | rs906487 | 4 | 48049654 | C | T | 0.142651 | 0.0408654 | 0.000481767 | 0.164853 | 0.0398861 | 3.58E-05 | 3 | 0.389684 | 0.004479649 |
| cg17841452 | 4 | TXK | 48137219 | rs1008277 | 4 | 48138535 | C | T | -0.180554 | 0.0491925 | 0.000242286 | -0.184669 | 0.0480116 | 0.000119938 | 2 | 0.22822 | 0.012069465 |
| cg19388996 | 4 | NAAA | 76862389 | rs2242474 | 4 | 76878982 | C | T | -0.767383 | 0.207183 | 0.000212382 | -0.767383 | 0.207183 | 0.000212382 | 1 | 0.0110434 | 0.018949184 |
| cg24690709 | 4 | DAPP1 | 100768712 | rs58304154 | 4 | 100768414 | A | G | 0.41203 | 0.0935287 | 1.06E-05 | 0.41203 | 0.0935287 | 1.06E-05 | 1 | 0.0795556 | 0.001613315 |
| cg06747982 | 4 | DNAJB14 | 100864777 | rs11938952 | 4 | 100866194 | C | T | -1.60484 | 0.329901 | 1.15E-06 | -1.60484 | 0.329901 | 1.15E-06 | 1 | 0.00615136 | 0.000262364 |
| cg00585621 | 4 | DNAJB14 | 100868748 | rs56140620 | 4 | 100935531 | G | A | -0.403997 | 0.0871331 | 3.55E-06 | -0.403997 | 0.0871331 | 3.55E-06 | 1 | 0.095169 | 0.000676425 |
| cg22490722 | 4 | - | 101210430 | rs11939538 | 4 | 100834618 | A | G | 1.99927 | 0.455012 | 1.11E-05 | 1.93731 | 0.461127 | 2.66E-05 | 1 | 0.00293649 | 0.003503747 |
| cg07830103 | 4 | NFKB1 | 103422050 | rs170731 | 4 | 103448903 | T | A | 1.20966 | 0.156747 | 1.20E-14 | 1.20966 | 0.156747 | 1.20E-14 | 1 | 0.0195081 | 1.63E-11 |
| cg00790535 | 4 | NFKB1 | 103482058 | rs230534 | 4 | 103449041 | T | C | -1.02312 | 0.129371 | 2.63E-15 | -1.02312 | 0.129371 | 2.63E-15 | 1 | 0.0289112 | 4.35E-12 |
| cg25663524 | 4 | NFKB1 | 103489295 | rs230533 | 4 | 103450083 | A | G | 1.33981 | 0.176863 | 3.61E-14 | 1.33981 | 0.176863 | 3.61E-14 | 1 | 0.0153524 | 4.57E-11 |
| cg25905215 | 4 | NFKB1 | 103537858 | rs735404 | 4 | 103553665 | A | G | 0.653349 | 0.069178 | 3.63E-21 | 0.653349 | 0.069178 | 3.63E-21 | 1 | 0.0957974 | 1.20E-17 |
| cg00875382 | 4 | - | 103542236 | rs10489113 | 4 | 103542201 | C | T | -0.608313 | 0.179117 | 0.000683466 | -0.608313 | 0.179117 | 0.000683466 | 1 | 0.0241301 | 0.046949736 |
| cg18954925 | 4 | UBE2D3 | 103736886 | rs228617 | 4 | 103580788 | T | C | 1.28907 | 0.176037 | 2.45E-13 | 1.28907 | 0.176037 | 2.45E-13 | 1 | 0.0145707 | 2.66E-10 |
| cg10792923 | 4 | UBE2D3 | 103789516 | rs223513 | 4 | 103625590 | T | C | -0.433491 | 0.0640794 | 1.34E-11 | -0.342226 | 0.0921491 | 0.000204203 | 3 | 0.589487 | 0.018422229 |
| cg16532752 | 4 | CENPE | 104119610 | rs2711896 | 4 | 104031440 | G | T | -0.148087 | 0.0423311 | 0.000468325 | -0.148087 | 0.0423311 | 0.000468325 | 1 | 0.405275 | 0.035166008 |
| cg06661812 | 4 | - | 105414831 | rs13111612 | 4 | 105407875 | T | C | -0.373176 | 0.125606 | 0.002968387 | -0.494234 | 0.126815 | 9.73E-05 | 3 | 0.112215 | 0.01020463 |
| cg20586654 | 4 | TET2 | 106132853 | rs6839705 | 4 | 106144735 | A | C | -1.65606 | 0.340437 | 1.15E-06 | -1.65606 | 0.340437 | 1.15E-06 | 1 | 0.00447374 | 0.000262364 |
| cg17862558 | 4 | TET2 | 106137048 | rs6533183 | 4 | 106133184 | C | T | -0.445217 | 0.0910046 | 9.98E-07 | -0.445217 | 0.0910046 | 9.98E-07 | 1 | 0.0636059 | 0.000232532 |
| cg09289469 | 4 | PPA2 | 106321260 | rs4698937 | 4 | 106273437 | C | G | 0.328912 | 0.0806214 | 4.51E-05 | 0.328912 | 0.0806214 | 4.51E-05 | 1 | 0.153427 | 0.005405636 |
| cg20073050 | 4 | PPA2 | 106395643 | rs1391438 | 4 | 106151843 | T | C | 0.710409 | 0.157508 | 6.48E-06 | 0.710409 | 0.157508 | 6.48E-06 | 1 | 0.0222048 | 0.001106926 |
| cg08167110 | 4 | FAM160A1 | 152543520 | rs3929153 | 4 | 152444631 | T | A | -0.167015 | 0.0583329 | 0.00419487 | -0.228342 | 0.0659222 | 0.000532679 | 3 | 0.238415 | 0.038672782 |
| cg17920099 | 5 | FAM105B | 14665505 | rs6895973 | 5 | 14621711 | A | C | 0.303143 | 0.100736 | 0.002618934 | 0.325067 | 0.0902575 | 0.0003164 | 2 | 0.0647738 | 0.025892884 |
| cg23336905 | 5 | SPEF2 | 35803436 | rs13188960 | 5 | 35853319 | T | G | 1.34812 | 0.15644 | 6.93E-18 | 1.33136 | 0.156748 | 2.03E-17 | 1 | 0.0260244 | 5.30E-14 |
| cg27582180 | 5 | - | 35852286 | rs6890853 | 5 | 35852311 | A | G | 0.893633 | 0.103811 | 7.51E-18 | 0.893633 | 0.103811 | 7.51E-18 | 1 | 0.0589851 | 2.06E-14 |
| cg04312209 | 5 | IL7R | 35857130 | rs10063294 | 5 | 35877505 | G | A | 0.69394 | 0.0888488 | 5.76E-15 | 0.597895 | 0.108875 | 3.99E-08 | 2 | 0.127308 | 1.42E-05 |
| cg14469019 | 5 | CAPSL | 35925230 | rs1008756 | 5 | 35905927 | C | A | -0.637606 | 0.188673 | 0.000726463 | -0.637606 | 0.188673 | 0.000726463 | 1 | 0.0134823 | 0.04919462 |
| cg02273827 | 5 | CAPSL | 35938675 | rs962029 | 5 | 35936237 | A | G | -0.438655 | 0.0994512 | 1.03E-05 | -0.438655 | 0.0994512 | 1.03E-05 | 1 | 0.0746156 | 0.001584212 |
| cg24202119 | 5 | CAPSL | 35938692 | rs80157830 | 5 | 35940601 | C | A | -0.271233 | 0.0626267 | 1.49E-05 | -0.257566 | 0.0587968 | 1.18E-05 | 2 | 0.208775 | 0.001774573 |
| cg26277754 | 5 | - | 50673033 | rs116577798 | 5 | 51219285 | G | T | -0.255549 | 0.0931848 | 0.006099606 | -0.250544 | 0.0731555 | 0.000615323 | 4 | 1.30154 | 0.043127473 |
| cg11488381 | 5 | - | 53921531 | rs13355991 | 5 | 53909217 | T | C | -0.298873 | 0.090951 | 0.001016028 | -0.302603 | 0.0841179 | 0.000321526 | 2 | 0.147796 | 0.026272604 |
| cg16020556 | 5 | ERAP1 | 96126443 | rs30187 | 5 | 96124330 | T | C | 0.719772 | 0.153266 | 2.65E-06 | 0.719772 | 0.153266 | 2.65E-06 | 1 | 0.0220884 | 0.000541076 |
| cg16673106 | 5 | ST8SIA4 | 100239071 | rs10044903 | 5 | 100187202 | C | T | -1.02925 | 0.21429 | 1.56E-06 | -1.02925 | 0.21429 | 1.56E-06 | 1 | 0.0116233 | 0.000340966 |
| cg00405699 | 5 | ST8SIA4 | 100239919 | rs3756354 | 5 | 100239533 | C | G | -1.11845 | 0.230969 | 1.28E-06 | -1.11845 | 0.230969 | 1.28E-06 | 1 | 0.0100034 | 0.000288779 |
| cg02855360 | 5 | C5orf30 | 102595549 | rs376286 | 5 | 102599390 | A | G | -0.691714 | 0.147547 | 2.76E-06 | -0.691714 | 0.147547 | 2.76E-06 | 1 | 0.0244858 | 0.000554619 |
| cg21184216 | 5 | C5orf30 | 102598034 | rs2288788 | 5 | 102600569 | G | T | -0.234237 | 0.0500121 | 2.82E-06 | -0.234237 | 0.0500121 | 2.82E-06 | 1 | 0.213176 | 0.000560536 |
| cg04500146 | 5 | C5orf30 | 102608478 | rs2569015 | 5 | 102608847 | G | A | -1.32047 | 0.271625 | 1.17E-06 | -1.32047 | 0.271625 | 1.17E-06 | 1 | 0.00723436 | 0.000266187 |
| cg23278018 | 5 | - | 102682153 | rs76160968 | 5 | 102682145 | G | A | 0.562192 | 0.131026 | 1.78E-05 | 0.562192 | 0.131026 | 1.78E-05 | 1 | 0.196371 | 0.002495182 |
| cg01547793 | 5 | LOC100289673 | 109220841 | rs6594405 | 5 | 109222729 | T | C | -1.06546 | 0.309238 | 0.00057022 | -1.06546 | 0.309238 | 0.00057022 | 1 | 0.00631029 | 0.040601409 |
| cg05670219 | 5 | LOC100289673 | 109220987 | rs6594405 | 5 | 109222729 | T | C | -0.432965 | 0.125663 | 0.00057022 | -0.432965 | 0.125663 | 0.00057022 | 1 | 0.0387209 | 0.040601409 |
| cg20710777 | 5 | TSLP | 110411740 | rs1379298 | 5 | 110435726 | C | T | 0.899582 | 0.262166 | 0.000600689 | 0.899582 | 0.262166 | 0.000600689 | 1 | 0.00721962 | 0.042450704 |
| cg23917399 | 5 | TNFAIP8 | 118691751 | rs10063063 | 5 | 118617999 | T | C | 0.0611813 | 0.0740043 | 0.4083917 | 0.174665 | 0.0474285 | 0.000230831 | 11 | 1.37731 | 0.020227908 |
| cg03318614 | 5 | PCDHA1 | 140174612 | rs155817 | 5 | 140301236 | T | C | 0.535368 | 0.15751 | 0.000676568 | 0.535368 | 0.15751 | 0.000676568 | 1 | 0.0195642 | 0.04659149 |
| cg19777540 | 5 | PCDHA2 | 140180691 | rs7710380 | 5 | 140156264 | T | C | -0.223389 | 0.094992 | 0.0186899 | -0.298543 | 0.0878749 | 0.000680487 | 2 | 0.141827 | 0.046784794 |
| cg12317217 | 5 | PCDHA2 | 140203603 | rs246073 | 5 | 140317371 | C | T | 0.802993 | 0.230451 | 0.00049326 | 0.802993 | 0.230451 | 0.00049326 | 1 | 0.00877457 | 0.036614414 |
| cg23985374 | 5 | PCDHA6 | 140240941 | rs246073 | 5 | 140317371 | C | T | -0.247438 | 0.0710124 | 0.00049326 | -0.247438 | 0.0710124 | 0.00049326 | 1 | 0.0932821 | 0.036614414 |
| cg09883264 | 5 | NDFIP1 | 141489170 | rs2338822 | 5 | 141503059 | T | C | 0.603853 | 0.114772 | 1.43E-07 | 0.603853 | 0.114772 | 1.43E-07 | 1 | 0.0373781 | 4.21E-05 |
| cg25547248 | 5 | NDFIP1 | 141501099 | rs12656877 | 5 | 141490091 | T | C | 0.219836 | 0.0420305 | 1.69E-07 | 0.254323 | 0.0532376 | 1.78E-06 | 2 | 0.469142 | 0.000379791 |
| cg09813400 | 5 | TNIP1 | 150431636 | rs1422673 | 5 | 150438988 | T | C | -0.760014 | 0.212643 | 0.000351459 | -0.760014 | 0.212643 | 0.000351459 | 1 | 0.0150912 | 0.028262614 |
| cg10967114 | 5 | TNIP1 | 150442668 | rs4958880 | 5 | 150438477 | A | C | -0.957354 | 0.269538 | 0.000382645 | -0.957354 | 0.269538 | 0.000382645 | 1 | 0.00941756 | 0.030232422 |
| cg14135060 | 5 | TNIP1 | 150456285 | rs6869605 | 5 | 150452866 | C | A | 1.02361 | 0.276285 | 0.000211536 | 1.02361 | 0.276285 | 0.000211536 | 1 | 0.0135111 | 0.018925827 |
| cg03197524 | 5 | TNIP1 | 150460989 | rs4958436 | 5 | 150442829 | C | T | -0.601309 | 0.172137 | 0.000477357 | -0.601309 | 0.172137 | 0.000477357 | 1 | 0.0228582 | 0.035547864 |
| cg03340667 | 5 | - | 150464285 | rs10071465 | 5 | 150471377 | G | A | 0.485365 | 0.137567 | 0.000418455 | 0.485365 | 0.137567 | 0.000418455 | 1 | 0.024967 | 0.032196813 |
| cg24903893 | 5 | EBF1 | 158522515 | rs34203499 | 5 | 158539554 | C | A | 1.05466 | 0.252522 | 2.96E-05 | 1.05466 | 0.252522 | 2.96E-05 | 1 | 0.0116692 | 0.003844394 |
| cg05530568 | 5 | EBF1 | 158526614 | rs35069904 | 5 | 158524855 | T | C | -0.561878 | 0.161542 | 0.00050485 | -0.561878 | 0.161542 | 0.00050485 | 1 | 0.031954 | 0.03728951 |
| cg17009297 | 5 | EBF1 | 158526642 | rs35069904 | 5 | 158524855 | T | C | -0.846251 | 0.2433 | 0.00050485 | -0.846251 | 0.2433 | 0.00050485 | 1 | 0.0140131 | 0.03728951 |
| cg27047836 | 5 | - | 158533081 | rs34203499 | 5 | 158539554 | C | A | 0.690426 | 0.165311 | 2.96E-05 | 0.690426 | 0.165311 | 2.96E-05 | 1 | 0.0274229 | 0.003844394 |
| cg03059649 | 5 | - | 158533375 | rs34203499 | 5 | 158539554 | C | A | 0.388761 | 0.0930824 | 2.96E-05 | 0.388761 | 0.0930824 | 2.96E-05 | 1 | 0.0867527 | 0.003844394 |
| cg16318768 | 5 | - | 158533774 | rs34203499 | 5 | 158539554 | C | A | 0.620218 | 0.148501 | 2.96E-05 | 0.620218 | 0.148501 | 2.96E-05 | 1 | 0.0340116 | 0.003844394 |
| cg02884181 | 5 | UBLCP1 | 158689508 | rs7734208 | 5 | 158693525 | G | C | 0.717673 | 0.142513 | 4.77E-07 | 0.717673 | 0.142513 | 4.77E-07 | 1 | 0.0367305 | 0.000121465 |
| cg01161877 | 5 | UBLCP1 | 158690922 | rs10515780 | 5 | 158691793 | C | G | -0.320076 | 0.0683427 | 2.82E-06 | -0.320076 | 0.0683427 | 2.82E-06 | 1 | 0.156332 | 0.000560536 |
| cg03871251 | 5 | - | 176757670 | rs6876677 | 5 | 176755342 | C | T | -0.251255 | 0.0715026 | 0.000441624 | -0.251255 | 0.0715026 | 0.000441624 | 1 | 0.106594 | 0.033502468 |
| cg23483530 | 5 | LMAN2 | 176759977 | rs11748912 | 5 | 176765395 | A | G | -0.607924 | 0.171614 | 0.000396614 | -0.607924 | 0.171614 | 0.000396614 | 1 | 0.0182093 | 0.031076763 |
| cg01140102 | 5 | LMAN2 | 176766085 | rs4131290 | 5 | 176780682 | C | A | -0.551339 | 0.141518 | 9.79E-05 | -0.551339 | 0.141518 | 9.79E-05 | 1 | 0.0291682 | 0.010256943 |
| cg25013269 | 5 | LMAN2 | 176766954 | rs6876677 | 5 | 176755342 | C | T | -0.383205 | 0.109053 | 0.000441624 | -0.383205 | 0.109053 | 0.000441624 | 1 | 0.0457761 | 0.033502468 |
| cg01567482 | 5 | RGS14 | 176784318 | rs4075958 | 5 | 176784512 | A | G | 0.157775 | 0.0411543 | 0.000126257 | 0.174297 | 0.0449139 | 0.000104197 | 2 | 0.388373 | 0.010828221 |
| cg04466840 | 5 | RGS14 | 176784719 | rs4075958 | 5 | 176784512 | A | G | 1.19334 | 0.311273 | 0.000126257 | 1.19334 | 0.311273 | 0.000126257 | 1 | 0.00582284 | 0.012549645 |
| cg01348086 | 5 | RGS14 | 176785296 | rs4075958 | 5 | 176784512 | A | G | -0.548432 | 0.143054 | 0.000126257 | -0.548432 | 0.143054 | 0.000126257 | 1 | 0.027915 | 0.012549645 |
| cg17261708 | 5 | RGS14 | 176794207 | rs11741640 | 5 | 176792743 | A | G | 0.105897 | 0.027833 | 0.000142007 | 0.111772 | 0.0268296 | 3.10E-05 | 2 | 0.99303 | 0.003984381 |
| cg13991631 | 5 | - | 176806390 | rs4074995 | 5 | 176797343 | A | G | 0.527469 | 0.134873 | 9.20E-05 | 0.527469 | 0.134873 | 9.20E-05 | 1 | 0.0315221 | 0.009710947 |
| cg06470558 | 5 | SLC34A1 | 176816828 | rs11748297 | 5 | 176800361 | A | G | -0.878485 | 0.22059 | 6.82E-05 | -0.878485 | 0.22059 | 6.82E-05 | 1 | 0.0117939 | 0.007485461 |
| cg24185628 | 5 | F12 | 176829349 | rs11748297 | 5 | 176800361 | A | G | -0.992863 | 0.249311 | 6.82E-05 | -0.992863 | 0.249311 | 6.82E-05 | 1 | 0.00921333 | 0.007485461 |
| cg05614346 | 5 | GRK6 | 176858608 | rs13153019 | 5 | 176782218 | C | T | 1.48292 | 0.382592 | 0.000106241 | 1.48292 | 0.382592 | 0.000106241 | 1 | 0.00431257 | 0.010972151 |
| cg12278738 | 6 | EXOC2 | 529278 | rs4960043 | 6 | 534527 | T | C | 0.582295 | 0.165005 | 0.000417295 | 0.582295 | 0.165005 | 0.000417295 | 1 | 0.0187031 | 0.032138089 |
| cg24291279 | 6 | EXOC2 | 529341 | rs6918152 | 6 | 542159 | A | G | 0.726189 | 0.20844 | 0.000494224 | 0.726189 | 0.20844 | 0.000494224 | 1 | 0.0112294 | 0.036669122 |
| cg24500898 | 6 | EXOC2 | 572732 | rs2073009 | 6 | 572480 | G | A | -0.129291 | 0.0372424 | 0.000517449 | -0.126498 | 0.0363426 | 0.000500196 | 2 | 0.376337 | 0.037044423 |
| cg27594683 | 6 | - | 7468945 | rs62386216 | 6 | 7478767 | T | A | -0.137259 | 0.0999044 | 0.1694724 | -0.241329 | 0.0578741 | 3.05E-05 | 6 | 1.4471 | 0.003935762 |
| cg16799831 | 6 | - | 7468973 | rs79526198 | 6 | 7434752 | T | C | -0.24392 | 0.0848573 | 0.004047191 | -0.256482 | 0.0635011 | 5.37E-05 | 6 | 1.29681 | 0.00620509 |
| cg01699293 | 6 | - | 11806115 | rs7743245 | 6 | 11808064 | T | C | -0.465059 | 0.121457 | 0.000128712 | -0.465059 | 0.121457 | 0.000128712 | 1 | 0.0389439 | 0.012731189 |
| cg12248807 | 6 | - | 25156302 | rs302974 | 6 | 25119106 | A | C | 0.618886 | 0.181764 | 0.000662019 | 0.618886 | 0.181764 | 0.000662019 | 1 | 0.0938026 | 0.045758525 |
| cg24345247 | 6 | HIST1H4A | 26021916 | rs36109883 | 6 | 26133070 | A | G | -0.742603 | 0.168114 | 1.00E-05 | -0.742603 | 0.168114 | 1.00E-05 | 1 | 0.0572797 | 0.001552096 |
| cg21479132 | 6 | - | 26055353 | rs68149500 | 6 | 26111271 | T | C | -0.185698 | 0.0487525 | 0.00013958 | -0.162834 | 0.045313 | 0.000326287 | 5 | 0.658174 | 0.026581208 |
| cg12089985 | 6 | HIST1H4C | 26104087 | rs16891315 | 6 | 26111756 | C | T | 0.915143 | 0.248375 | 0.000229201 | 0.915143 | 0.248375 | 0.000229201 | 1 | 0.0179559 | 0.020139492 |
| cg14648265 | 6 | HIST1H4C | 26104089 | rs16891334 | 6 | 26124303 | C | T | 0.943902 | 0.233582 | 5.33E-05 | 0.943902 | 0.233582 | 5.33E-05 | 1 | 0.0208378 | 0.006165414 |
| cg11190156 | 6 | HIST1H4C | 26104118 | rs68149500 | 6 | 26111271 | T | C | 0.971255 | 0.25499 | 0.00013958 | 0.971255 | 0.25499 | 0.00013958 | 1 | 0.0174104 | 0.013598684 |
| cg22213149 | 6 | HIST1H1T | 26107687 | rs13206443 | 6 | 26119245 | T | C | -1.50337 | 0.361164 | 3.15E-05 | -1.50337 | 0.361164 | 3.15E-05 | 1 | 0.00876957 | 0.004035183 |
| cg19722391 | 6 | HIST1H1T | 26109250 | rs707890 | 6 | 26105504 | C | A | 0.255142 | 0.0667975 | 0.000133699 | 0.265967 | 0.072387 | 0.000238628 | 2 | 0.183648 | 0.020743014 |
| cg12765632 | 6 | HIST1H1T | 26109295 | rs707890 | 6 | 26105504 | C | A | -0.391151 | 0.102405 | 0.000133699 | -0.391151 | 0.102405 | 0.000133699 | 1 | 0.0763744 | 0.013080817 |
| cg20153768 | 6 | HIST1H2AC | 26123228 | rs74571768 | 6 | 26122547 | A | G | 0.434437 | 0.118448 | 0.000244774 | 0.434437 | 0.118448 | 0.000244774 | 1 | 0.0593318 | 0.021129965 |
| cg19084075 | 6 | HIST1H2AC | 26124329 | rs13197334 | 6 | 26122648 | C | G | -0.302844 | 0.0749082 | 5.28E-05 | -0.329643 | 0.0696695 | 2.23E-06 | 4 | 0.274778 | 0.000465507 |
| cg08203210 | 6 | - | 26153217 | rs7766641 | 6 | 26184102 | A | G | -1.55192 | 0.276081 | 1.90E-08 | -1.55192 | 0.276081 | 1.90E-08 | 1 | 0.00780901 | 7.39E-06 |
| cg24996758 | 6 | HIST1H2BD | 26160318 | rs972087 | 6 | 25872579 | G | A | -1.31043 | 0.356161 | 0.000233922 | -1.31043 | 0.356161 | 0.000233922 | 1 | 0.00936235 | 0.020437844 |
| cg07618435 | 6 | HIST1H2BD | 26160478 | rs7749823 | 6 | 26158079 | C | A | -0.84786 | 0.187476 | 6.12E-06 | -0.84786 | 0.187476 | 6.12E-06 | 1 | 0.0303828 | 0.001053865 |
| cg22942804 | 6 | HIST1H2BE | 26183572 | rs7766641 | 6 | 26184102 | A | G | 1.02407 | 0.182177 | 1.90E-08 | 1.02407 | 0.182177 | 1.90E-08 | 1 | 0.0180599 | 7.39E-06 |
| cg22036966 | 6 | HIST1H2BE | 26183576 | rs7766641 | 6 | 26184102 | A | G | 1.13231 | 0.201433 | 1.90E-08 | 1.13231 | 0.201433 | 1.90E-08 | 1 | 0.0147543 | 7.39E-06 |
| cg07997936 | 6 | HIST1H2BE | 26183678 | rs707899 | 6 | 26129948 | T | C | 1.03322 | 0.255316 | 5.19E-05 | 1.03322 | 0.255316 | 5.19E-05 | 1 | 0.0127316 | 0.006030774 |
| cg12315302 | 6 | HIST1H4D | 26189340 | rs34107459 | 6 | 26328353 | C | T | -0.216187 | 0.0405457 | 9.74E-08 | -0.193539 | 0.0532213 | 0.000276433 | 5 | 1.06086 | 0.023328695 |
| cg08733522 | 6 | HIST1H4E | 26205212 | rs2179517 | 6 | 26198845 | G | C | 0.770674 | 0.192776 | 6.40E-05 | 0.770674 | 0.192776 | 6.40E-05 | 1 | 0.0128199 | 0.007103655 |
| cg01168740 | 6 | - | 26229103 | rs2179517 | 6 | 26198845 | G | C | -0.295095 | 0.0738151 | 6.40E-05 | -0.295095 | 0.0738151 | 6.40E-05 | 1 | 0.0878636 | 0.007103655 |
| cg14273822 | 6 | HIST1H3G | 26271716 | rs1125000 | 6 | 26287256 | C | T | 0.469784 | 0.135045 | 0.000503896 | 0.469784 | 0.135045 | 0.000503896 | 1 | 0.0261835 | 0.03728951 |
| cg21281951 | 6 | HIST1H3G | 26272355 | rs2893820 | 6 | 26295686 | A | G | 0.374001 | 0.0871275 | 1.77E-05 | 0.374001 | 0.0871275 | 1.77E-05 | 1 | 0.0643236 | 0.002476533 |
| cg23465465 | 6 | BTN3A2 | 26364728 | rs9358935 | 6 | 26369587 | G | A | -0.241396 | 0.0483783 | 6.05E-07 | -0.244705 | 0.0478414 | 3.14E-07 | 2 | 0.512385 | 8.38E-05 |
| cg02045355 | 6 | BTN3A2 | 26365194 | rs9379856 | 6 | 26366836 | C | A | -0.499622 | 0.0990114 | 4.52E-07 | -0.499622 | 0.0990114 | 4.52E-07 | 1 | 0.121502 | 0.000115857 |
| cg23571456 | 6 | BTN2A2 | 26383374 | rs9461249 | 6 | 26383386 | C | T | 0.390411 | 0.0887839 | 1.10E-05 | 0.390411 | 0.0887839 | 1.10E-05 | 1 | 0.151324 | 0.001660308 |
| cg21264972 | 6 | BTN2A2 | 26386191 | rs3757142 | 6 | 26380545 | G | A | 1.14838 | 0.286392 | 6.08E-05 | 1.14838 | 0.286392 | 6.08E-05 | 1 | 0.00899774 | 0.006841006 |
| cg14004232 | 6 | BTN3A1 | 26401691 | rs6912853 | 6 | 26401438 | T | C | -1.12151 | 0.295139 | 0.000144769 | -1.12151 | 0.295139 | 0.000144769 | 1 | 0.00910987 | 0.013969989 |
| cg10414736 | 6 | HCG11 | 26521747 | rs16891725 | 6 | 26479150 | T | C | -1.08681 | 0.221289 | 9.06E-07 | -1.08681 | 0.221289 | 9.06E-07 | 1 | 0.0223384 | 0.000214477 |
| cg20250722 | 6 | HCG11 | 26522136 | rs16901784 | 6 | 26555433 | A | C | -0.370988 | 0.0815291 | 5.36E-06 | -0.350255 | 0.0756025 | 3.61E-06 | 3 | 0.176609 | 0.00068703 |
| cg22040809 | 6 | HCG11 | 26522578 | rs16901784 | 6 | 26555433 | A | C | -0.299786 | 0.0658818 | 5.36E-06 | -0.305539 | 0.0839576 | 0.000273544 | 5 | 0.417754 | 0.023145163 |
| cg08882171 | 6 | - | 26528628 | rs16901784 | 6 | 26555433 | A | C | 1.1579 | 0.254462 | 5.36E-06 | 1.1579 | 0.254462 | 5.36E-06 | 1 | 0.0163165 | 0.000946627 |
| cg13984718 | 6 | - | 26554297 | rs35982103 | 6 | 27243134 | T | C | -1.28279 | 0.370658 | 0.000538583 | -1.28279 | 0.370658 | 0.000538583 | 1 | 0.00515628 | 0.03892711 |
| cg27215578 | 6 | - | 26569043 | rs9295696 | 6 | 26550288 | C | T | 1.59981 | 0.406293 | 8.23E-05 | 1.59981 | 0.406293 | 8.23E-05 | 1 | 0.00398841 | 0.008805918 |
| cg03900386 | 6 | - | 26569090 | rs77666565 | 6 | 26851415 | A | G | 1.02023 | 0.196392 | 2.05E-07 | 1.02023 | 0.196392 | 2.05E-07 | 1 | 0.0345082 | 5.74E-05 |
| cg06305488 | 6 | - | 26569533 | rs1535275 | 6 | 26520767 | G | C | 0.705915 | 0.174694 | 5.33E-05 | 0.705915 | 0.174694 | 5.33E-05 | 1 | 0.0220991 | 0.006165414 |
| cg08737094 | 6 | - | 26569535 | rs7765920 | 6 | 26514771 | C | T | 0.538854 | 0.132891 | 5.02E-05 | 0.538854 | 0.132891 | 5.02E-05 | 1 | 0.0381384 | 0.005858098 |
| cg05132821 | 6 | - | 26569537 | rs7765920 | 6 | 26514771 | C | T | 0.475352 | 0.11723 | 5.02E-05 | 0.475352 | 0.11723 | 5.02E-05 | 1 | 0.0490385 | 0.005858098 |
| cg15379240 | 6 | - | 26592423 | rs34781270 | 6 | 26593037 | G | A | -1.14871 | 0.214167 | 8.18E-08 | -1.14871 | 0.214167 | 8.18E-08 | 1 | 0.0273884 | 2.60E-05 |
| cg05185573 | 6 | ABT1 | 26598237 | rs6456739 | 6 | 26604140 | C | T | 0.480478 | 0.130724 | 0.000237433 | 0.480478 | 0.130724 | 0.000237433 | 1 | 0.0261814 | 0.020650175 |
| cg11165035 | 6 | - | 26601993 | rs4634439 | 6 | 26598004 | G | A | 0.598654 | 0.126442 | 2.20E-06 | 0.598654 | 0.126442 | 2.20E-06 | 1 | 0.0698593 | 0.000459082 |
| cg11033938 | 6 | - | 26602400 | rs6456739 | 6 | 26604140 | C | T | 0.548974 | 0.14936 | 0.000237433 | 0.548974 | 0.14936 | 0.000237433 | 1 | 0.0200516 | 0.020650175 |
| cg09364178 | 6 | - | 26602900 | rs6456739 | 6 | 26604140 | C | T | 0.740802 | 0.201551 | 0.000237433 | 0.740802 | 0.201551 | 0.000237433 | 1 | 0.0109787 | 0.020650175 |
| cg11567288 | 6 | - | 26758166 | rs4713037 | 6 | 26758030 | G | T | 0.501679 | 0.133371 | 0.000168941 | 0.501679 | 0.133371 | 0.000168941 | 1 | 0.0322796 | 0.015718727 |
| cg16120796 | 6 | - | 27067005 | rs34783558 | 6 | 27171700 | C | T | 1.48033 | 0.366922 | 5.48E-05 | 1.48033 | 0.366922 | 5.48E-05 | 1 | 0.00585422 | 0.006310397 |
| cg23155468 | 6 | HIST1H2BK | 27110703 | rs12195144 | 6 | 27031857 | T | C | -0.22705 | 0.0535814 | 2.26E-05 | -0.22705 | 0.0535814 | 2.26E-05 | 1 | 0.438084 | 0.003050654 |
| cg04826368 | 6 | - | 27130208 | rs858992 | 6 | 27180827 | G | C | 0.56065 | 0.144027 | 9.92E-05 | 0.56065 | 0.144027 | 9.92E-05 | 1 | 0.0562558 | 0.010380767 |
| cg01161889 | 6 | - | 27145367 | rs35173303 | 6 | 26935379 | T | C | 1.65121 | 0.312965 | 1.32E-07 | 1.65121 | 0.312965 | 1.32E-07 | 1 | 0.0140639 | 3.93E-05 |
| cg01242956 | 6 | - | 27148026 | rs67540232 | 6 | 27140866 | A | T | 0.918837 | 0.217717 | 2.44E-05 | 0.918837 | 0.217717 | 2.44E-05 | 1 | 0.0167476 | 0.003276022 |
| cg17608350 | 6 | - | 27155925 | rs858969 | 6 | 27153431 | C | A | 0.0983275 | 0.0311069 | 0.001572655 | 0.104034 | 0.0303433 | 0.000606865 | 3 | 0.708228 | 0.042775254 |
| cg09559278 | 6 | - | 27179116 | rs11758615 | 6 | 27192382 | C | A | -0.774285 | 0.199821 | 0.00010671 | -0.774285 | 0.199821 | 0.00010671 | 1 | 0.0290559 | 0.0110118 |
| cg03626734 | 6 | PRSS16 | 27218793 | rs35454259 | 6 | 27254475 | A | G | 0.998512 | 0.274003 | 0.000268334 | 0.998512 | 0.274003 | 0.000268334 | 1 | 0.00852031 | 0.022799513 |
| cg05121987 | 6 | PRSS16 | 27219299 | rs35982103 | 6 | 27243134 | T | C | -0.752773 | 0.217512 | 0.000538583 | -0.752773 | 0.217512 | 0.000538583 | 1 | 0.0151878 | 0.03892711 |
| cg26952407 | 6 | PRSS16 | 27219317 | rs36034627 | 6 | 27237363 | T | G | -0.519453 | 0.151874 | 0.00062566 | -0.519453 | 0.151874 | 0.00062566 | 1 | 0.0315944 | 0.043757567 |
| cg17658733 | 6 | PRSS16 | 27219385 | rs35589403 | 6 | 27219491 | G | C | -0.243754 | 0.0684878 | 0.000372236 | -0.243754 | 0.0684878 | 0.000372236 | 1 | 0.158436 | 0.02968308 |
| cg23718606 | 6 | PRSS16 | 27219812 | rs36034627 | 6 | 27237363 | T | G | 0.642659 | 0.187896 | 0.00062566 | 0.642659 | 0.187896 | 0.00062566 | 1 | 0.0206016 | 0.043757567 |
| cg07739113 | 6 | - | 27255829 | rs72843641 | 6 | 27203335 | G | C | 1.24757 | 0.300836 | 3.37E-05 | 1.24757 | 0.300836 | 3.37E-05 | 1 | 0.0137768 | 0.004258978 |
| cg23464183 | 6 | - | 27256406 | rs35454259 | 6 | 27254475 | A | G | -0.42604 | 0.11691 | 0.000268334 | -0.42604 | 0.11691 | 0.000268334 | 1 | 0.0472735 | 0.022799513 |
| cg02652760 | 6 | POM121L2 | 27278678 | rs28410967 | 6 | 27265235 | C | T | -0.475597 | 0.111341 | 1.94E-05 | -0.475597 | 0.111341 | 1.94E-05 | 1 | 0.105076 | 0.002681342 |
| cg04420723 | 6 | ZNF184 | 27439931 | rs4711154 | 6 | 27446359 | A | T | 0.278509 | 0.073466 | 0.000150099 | 0.278509 | 0.073466 | 0.000150099 | 1 | 0.0853025 | 0.014381541 |
| cg00169412 | 6 | - | 27463347 | rs4711154 | 6 | 27446359 | A | T | -0.898516 | 0.237014 | 0.000150099 | -0.898516 | 0.237014 | 0.000150099 | 1 | 0.00812786 | 0.014381541 |
| cg09482421 | 6 | - | 27470541 | rs9468141 | 6 | 27474527 | G | A | 0.722643 | 0.195841 | 0.000224364 | 0.722643 | 0.195841 | 0.000224364 | 1 | 0.0124679 | 0.019735832 |
| cg19241872 | 6 | - | 27470566 | rs6911865 | 6 | 27470778 | T | A | 0.419253 | 0.113873 | 0.000231695 | 0.419253 | 0.113873 | 0.000231695 | 1 | 0.0372087 | 0.020292625 |
| cg25259653 | 6 | - | 27480408 | rs2294308 | 6 | 27483260 | T | C | -0.62976 | 0.165052 | 0.000135946 | -0.62976 | 0.165052 | 0.000135946 | 1 | 0.0175685 | 0.013260624 |
| cg25783550 | 6 | - | 27512906 | rs17693963 | 6 | 27710165 | C | A | 1.25686 | 0.228737 | 3.92E-08 | 1.25686 | 0.228737 | 3.92E-08 | 1 | 0.0235046 | 1.39E-05 |
| cg11497372 | 6 | - | 27513092 | rs72845046 | 6 | 27575268 | A | T | 1.7823 | 0.326227 | 4.68E-08 | 1.71455 | 0.344504 | 6.47E-07 | 1 | 0.0110059 | 0.000158743 |
| cg27131891 | 6 | - | 27513414 | rs34038546 | 6 | 27607660 | A | C | 0.945427 | 0.171786 | 3.73E-08 | 0.83578 | 0.139747 | 2.23E-09 | 2 | 0.0766887 | 1.13E-06 |
| cg07841905 | 6 | - | 27521450 | rs13215275 | 6 | 27647509 | T | G | 1.43438 | 0.257412 | 2.52E-08 | 1.43438 | 0.257412 | 2.52E-08 | 1 | 0.0205259 | 9.50E-06 |
| cg06395469 | 6 | - | 27635558 | rs34038546 | 6 | 27607660 | A | C | -0.557487 | 0.101297 | 3.73E-08 | -0.557487 | 0.101297 | 3.73E-08 | 1 | 0.132679 | 1.33E-05 |
| cg18784558 | 6 | - | 27635849 | rs10484399 | 6 | 27534528 | G | A | -0.517557 | 0.0927221 | 2.39E-08 | -0.458836 | 0.103799 | 9.86E-06 | 2 | 0.213719 | 0.001535363 |
| cg01810111 | 6 | - | 27637395 | rs2294309 | 6 | 27483816 | G | T | 0.87644 | 0.225515 | 0.000101787 | 0.87644 | 0.225515 | 0.000101787 | 1 | 0.00935556 | 0.010625501 |
| cg26958806 | 6 | - | 27640298 | rs71559038 | 6 | 27640989 | G | A | -0.60326 | 0.107908 | 2.27E-08 | -0.60326 | 0.107908 | 2.27E-08 | 1 | 0.117354 | 8.62E-06 |
| cg12185399 | 6 | - | 27640341 | rs17720293 | 6 | 28214698 | T | C | -0.788906 | 0.148606 | 1.11E-07 | -0.788906 | 0.148606 | 1.11E-07 | 1 | 0.0510121 | 3.38E-05 |
| cg10903903 | 6 | - | 27647843 | rs144969912 | 6 | 27616843 | T | C | -1.26847 | 0.230152 | 3.57E-08 | -1.26847 | 0.230152 | 3.57E-08 | 1 | 0.0254895 | 1.29E-05 |
| cg27179866 | 6 | - | 27740120 | rs6902689 | 6 | 27709441 | T | C | -0.119544 | 0.0366248 | 0.001098584 | -0.128588 | 0.0344523 | 0.00018977 | 3 | 0.552532 | 0.017303118 |
| cg10046620 | 6 | HIST1H2AI | 27775042 | rs34718920 | 6 | 27783941 | T | C | -0.220949 | 0.039304 | 1.90E-08 | -0.219791 | 0.0386812 | 1.33E-08 | 2 | 0.865772 | 5.49E-06 |
| cg25108566 | 6 | HIST1H2AI | 27775657 | rs2747054 | 6 | 27783359 | G | A | -0.269749 | 0.0496297 | 5.49E-08 | -0.269749 | 0.0496297 | 5.49E-08 | 1 | 0.457855 | 1.86E-05 |
| cg02228804 | 6 | HIST1H2AI | 27775720 | rs200990 | 6 | 27815823 | G | T | -0.522747 | 0.0960172 | 5.21E-08 | -0.522747 | 0.0960172 | 5.21E-08 | 1 | 0.121864 | 1.81E-05 |
| cg02817123 | 6 | HIST1H2AI | 27775750 | rs9257136 | 6 | 28723841 | C | A | 1.62863 | 0.324575 | 5.24E-07 | 1.62863 | 0.324575 | 5.24E-07 | 1 | 0.0121834 | 0.000132438 |
| cg21771891 | 6 | HIST1H2AJ | 27782126 | rs493161 | 6 | 27850714 | T | A | 1.42147 | 0.282706 | 4.96E-07 | 1.42147 | 0.282706 | 4.96E-07 | 1 | 0.014323 | 0.000125996 |
| cg12263794 | 6 | HIST1H4J | 27791530 | rs6920813 | 6 | 28483411 | T | C | 0.793656 | 0.224285 | 0.00040233 | 0.793656 | 0.224285 | 0.00040233 | 1 | 0.0552178 | 0.031387879 |
| cg23372001 | 6 | HIST1H4J | 27791640 | rs6920813 | 6 | 28483411 | T | C | 0.60919 | 0.172155 | 0.00040233 | 0.60919 | 0.172155 | 0.00040233 | 1 | 0.0943285 | 0.031387879 |
| cg00856041 | 6 | - | 27798455 | rs17763089 | 6 | 27835218 | A | G | -0.51719 | 0.0924732 | 2.24E-08 | -0.51719 | 0.0924732 | 2.24E-08 | 1 | 0.153228 | 8.54E-06 |
| cg20715953 | 6 | - | 27802817 | rs66785117 | 6 | 27523298 | G | T | -0.656374 | 0.116397 | 1.71E-08 | -0.656374 | 0.116397 | 1.71E-08 | 1 | 0.0995992 | 6.81E-06 |
| cg16914272 | 6 | HIST1H2BN | 27806842 | rs141342723 | 6 | 27622084 | C | T | 1.24107 | 0.225374 | 3.66E-08 | 1.24107 | 0.225374 | 3.66E-08 | 1 | 0.0266215 | 1.31E-05 |
| cg11992375 | 6 | HIST1H4L | 27840957 | rs66868086 | 6 | 27865902 | T | A | -0.850989 | 0.163432 | 1.92E-07 | -0.850989 | 0.163432 | 1.92E-07 | 1 | 0.0503467 | 5.50E-05 |
| cg16138458 | 6 | HIST1H4L | 27841120 | rs13216117 | 6 | 27938484 | G | A | 1.6576 | 0.308224 | 7.55E-08 | 1.6576 | 0.308224 | 7.55E-08 | 1 | 0.0138787 | 2.46E-05 |
| cg25681872 | 6 | - | 27862708 | rs72839470 | 6 | 27309304 | A | T | -1.47436 | 0.415371 | 0.000386027 | -1.47436 | 0.415371 | 0.000386027 | 1 | 0.00779277 | 0.030357163 |
| cg12351042 | 6 | OR2B2 | 27879749 | rs13200214 | 6 | 28017250 | T | C | -0.477331 | 0.0846564 | 1.72E-08 | -0.507468 | 0.0774542 | 5.71E-11 | 2 | 0.231585 | 4.58E-08 |
| cg15325629 | 6 | - | 28072465 | rs75543204 | 6 | 28108816 | A | C | 0.284109 | 0.08359 | 0.000676813 | 0.284109 | 0.08359 | 0.000676813 | 1 | 0.281684 | 0.04659149 |
| cg00426182 | 6 | - | 28072559 | rs72849210 | 6 | 28180459 | T | C | 0.897616 | 0.258714 | 0.000521469 | 0.897616 | 0.258714 | 0.000521469 | 1 | 0.0294639 | 0.038132833 |
| cg10122326 | 6 | - | 28072925 | rs72846797 | 6 | 28149958 | G | T | 0.586827 | 0.163508 | 0.000332054 | 0.586827 | 0.163508 | 0.000332054 | 1 | 0.0733056 | 0.026969714 |
| cg00437239 | 6 | - | 28173238 | rs1778508 | 6 | 28229881 | C | T | -1.05042 | 0.19732 | 1.02E-07 | -1.05042 | 0.19732 | 1.02E-07 | 1 | 0.0232561 | 3.16E-05 |
| cg06470822 | 6 | - | 28175283 | rs71559070 | 6 | 28038929 | A | G | 0.93749 | 0.168429 | 2.61E-08 | 0.781504 | 0.16395 | 1.87E-06 | 3 | 0.101677 | 0.000398327 |
| cg07495811 | 6 | - | 28175919 | rs10456362 | 6 | 28221816 | A | G | 0.831645 | 0.156952 | 1.17E-07 | 0.831645 | 0.156952 | 1.17E-07 | 1 | 0.0371936 | 3.56E-05 |
| cg03111404 | 6 | - | 28175984 | rs61742093 | 6 | 27879982 | G | A | 0.986747 | 0.191459 | 2.56E-07 | 0.663909 | 0.194075 | 0.000624281 | 3 | 0.118486 | 0.043698868 |
| cg12172441 | 6 | - | 28176163 | rs6456816 | 6 | 28311421 | T | C | 0.626852 | 0.125733 | 6.19E-07 | 0.66931 | 0.104199 | 1.34E-10 | 2 | 0.0911282 | 9.52E-08 |
| cg25164649 | 6 | - | 28176230 | rs1736904 | 6 | 28219270 | A | G | 1.02442 | 0.199414 | 2.79E-07 | 1.02442 | 0.199414 | 2.79E-07 | 1 | 0.0179583 | 7.55E-05 |
| cg26234795 | 6 | - | 28179256 | rs2799081 | 6 | 28270584 | C | T | -0.387926 | 0.0749048 | 2.24E-07 | -0.391772 | 0.0589326 | 2.99E-11 | 3 | 0.263341 | 2.54E-08 |
| cg13904842 | 6 | - | 28180511 | rs41269285 | 6 | 28194799 | C | T | 0.35902 | 0.101712 | 0.000416036 | 0.35902 | 0.101712 | 0.000416036 | 1 | 0.19232 | 0.032101046 |
| cg18649503 | 6 | LOC222699 | 28187510 | rs41269285 | 6 | 28194799 | C | T | -0.44579 | 0.126295 | 0.000416036 | -0.44579 | 0.126295 | 0.000416036 | 1 | 0.124599 | 0.032101046 |
| cg24154054 | 6 | ZKSCAN4 | 28220253 | rs72849211 | 6 | 28182896 | G | C | 1.64116 | 0.411803 | 6.74E-05 | 1.64116 | 0.411803 | 6.74E-05 | 1 | 0.00900627 | 0.007430925 |
| cg26450541 | 6 | ZNF187 | 28235208 | rs1936365 | 6 | 28268452 | C | G | -1.09279 | 0.203257 | 7.62E-08 | -1.09279 | 0.203257 | 7.62E-08 | 1 | 0.021866 | 2.47E-05 |
| cg14242556 | 6 | PGBD1 | 28253513 | rs9368561 | 6 | 28168343 | T | C | 1.63501 | 0.333253 | 9.30E-07 | 1.63501 | 0.333253 | 9.30E-07 | 1 | 0.00872662 | 0.000219286 |
| cg21750589 | 6 | ZNF323 | 28321301 | rs4254981 | 6 | 28371402 | C | A | 0.670801 | 0.139681 | 1.57E-06 | 0.670801 | 0.139681 | 1.57E-06 | 1 | 0.0273822 | 0.000341166 |
| cg12212060 | 6 | ZNF323 | 28323405 | rs13201681 | 6 | 28394680 | T | C | 0.382045 | 0.0747296 | 3.19E-07 | 0.371181 | 0.0720933 | 2.63E-07 | 2 | 0.306557 | 7.16E-05 |
| cg09015325 | 6 | ZKSCAN3 | 28324607 | rs9366718 | 6 | 28205502 | T | A | 0.605089 | 0.119342 | 3.98E-07 | 0.605089 | 0.119342 | 3.98E-07 | 1 | 0.0534861 | 0.000103749 |
| cg11341932 | 6 | ZKSCAN3 | 28324655 | rs67340775 | 6 | 28304384 | C | A | 1.05227 | 0.208399 | 4.44E-07 | 1.05227 | 0.208399 | 4.44E-07 | 1 | 0.0300855 | 0.000114217 |
| cg23779644 | 6 | ZSCAN12 | 28354168 | rs16894060 | 6 | 28362471 | C | T | 1.49992 | 0.3026 | 7.18E-07 | 1.49992 | 0.3026 | 7.18E-07 | 1 | 0.00578922 | 0.000173675 |
| cg21108553 | 6 | ZSCAN12 | 28357838 | rs3117326 | 6 | 29240378 | T | C | 0.534826 | 0.105919 | 4.44E-07 | 0.534826 | 0.105919 | 4.44E-07 | 1 | 0.116475 | 0.000114217 |
| cg23164203 | 6 | ZSCAN12 | 28367475 | rs6907950 | 6 | 28370246 | T | C | 0.486551 | 0.101724 | 1.73E-06 | 0.486551 | 0.101724 | 1.73E-06 | 1 | 0.0514778 | 0.000371731 |
| cg18815343 | 6 | ZSCAN12 | 28367644 | rs4580862 | 6 | 28367663 | C | T | 0.244315 | 0.05055 | 1.35E-06 | 0.244315 | 0.05055 | 1.35E-06 | 1 | 0.208576 | 0.000300514 |
| cg20275132 | 6 | ZSCAN12 | 28367749 | rs16894060 | 6 | 28362471 | C | T | 1.02301 | 0.206385 | 7.18E-07 | 1.02301 | 0.206385 | 7.18E-07 | 1 | 0.0125495 | 0.000173675 |
| cg21488066 | 6 | ZSCAN12 | 28367898 | rs4357130 | 6 | 28367683 | G | T | 0.143273 | 0.029644 | 1.35E-06 | 0.145809 | 0.0414431 | 0.000434427 | 4 | 1.05098 | 0.033095888 |
| cg24441954 | 6 | ZSCAN23 | 28401527 | rs2531806 | 6 | 28417152 | A | C | -1.53619 | 0.337389 | 5.29E-06 | -1.53619 | 0.337389 | 5.29E-06 | 1 | 0.00400036 | 0.000935129 |
| cg20803211 | 6 | ZSCAN23 | 28403086 | rs2531803 | 6 | 28411220 | G | T | -0.388656 | 0.0904193 | 1.72E-05 | -0.388656 | 0.0904193 | 1.72E-05 | 1 | 0.0569346 | 0.00242506 |
| cg07838603 | 6 | ZSCAN23 | 28411030 | rs1361387 | 6 | 28412929 | G | T | 0.372093 | 0.0852608 | 1.28E-05 | 0.372093 | 0.0852608 | 1.28E-05 | 1 | 0.0641424 | 0.001870206 |
| cg06818710 | 6 | ZSCAN23 | 28411271 | rs1361387 | 6 | 28412929 | G | T | 0.787638 | 0.180478 | 1.28E-05 | 0.787638 | 0.180478 | 1.28E-05 | 1 | 0.0142579 | 0.001870206 |
| cg00651523 | 6 | ZSCAN23 | 28411279 | rs916403 | 6 | 28408258 | G | A | 1.29468 | 0.296239 | 1.24E-05 | 1.29468 | 0.296239 | 1.24E-05 | 1 | 0.00518511 | 0.001834176 |
| cg07836142 | 6 | ZSCAN23 | 28411423 | rs1361387 | 6 | 28412929 | G | T | 0.480241 | 0.110042 | 1.28E-05 | 0.480241 | 0.110042 | 1.28E-05 | 1 | 0.0384765 | 0.001870206 |
| cg23847843 | 6 | ZSCAN23 | 28412459 | rs1361387 | 6 | 28412929 | G | T | 0.276085 | 0.0632617 | 1.28E-05 | 0.335393 | 0.0935281 | 0.000335847 | 2 | 0.171105 | 0.027182513 |
| cg15032142 | 6 | - | 28414780 | rs4412194 | 6 | 28383589 | T | C | -0.663654 | 0.153253 | 1.49E-05 | -0.663654 | 0.153253 | 1.49E-05 | 1 | 0.0647297 | 0.002134475 |
| cg14420401 | 6 | - | 28436690 | rs71559087 | 6 | 28491075 | T | C | 0.47588 | 0.138384 | 0.000584332 | 0.47588 | 0.138384 | 0.000584332 | 1 | 0.0893043 | 0.041439282 |
| cg24660009 | 6 | - | 28458175 | rs72844224 | 6 | 28458102 | A | G | -0.493996 | 0.110961 | 8.52E-06 | -0.493996 | 0.110961 | 8.52E-06 | 1 | 0.136357 | 0.001370883 |
| cg02978784 | 6 | - | 28460106 | rs2531806 | 6 | 28417152 | A | C | -0.789701 | 0.17344 | 5.29E-06 | -0.789701 | 0.17344 | 5.29E-06 | 1 | 0.0153745 | 0.000935129 |
| cg22709144 | 6 | GPX6 | 28478579 | rs72854546 | 6 | 28350969 | G | A | 0.975521 | 0.223545 | 1.28E-05 | 0.975521 | 0.223545 | 1.28E-05 | 1 | 0.0335054 | 0.001871044 |
| cg11778252 | 6 | GPX6 | 28479712 | rs6920813 | 6 | 28483411 | T | C | 0.337852 | 0.095476 | 0.00040233 | 0.336839 | 0.0909243 | 0.000211779 | 2 | 0.381957 | 0.018937108 |
| cg16456252 | 6 | GPX6 | 28483537 | rs2531818 | 6 | 28453102 | C | G | 0.475675 | 0.126832 | 0.000176573 | 0.475675 | 0.126832 | 0.000176573 | 1 | 0.0935721 | 0.016301511 |
| cg19238521 | 6 | GPX5 | 28497344 | rs2531806 | 6 | 28417152 | A | C | 0.73881 | 0.162263 | 5.29E-06 | 0.73881 | 0.162263 | 5.29E-06 | 1 | 0.017571 | 0.000935129 |
| cg07734514 | 6 | GPX5 | 28498759 | rs7748643 | 6 | 28659407 | A | G | 0.34653 | 0.101759 | 0.000660805 | 0.46438 | 0.0927223 | 5.50E-07 | 2 | 0.161717 | 0.000138247 |
| cg18361418 | 6 | GPX5 | 28499676 | rs72844226 | 6 | 28466440 | A | G | 0.320663 | 0.0732783 | 1.21E-05 | 0.320663 | 0.0732783 | 1.21E-05 | 1 | 0.314521 | 0.001799601 |
| cg12280901 | 6 | GPX5 | 28501816 | rs41270579 | 6 | 28348109 | G | C | 0.386469 | 0.0886151 | 1.29E-05 | 0.386469 | 0.0886151 | 1.29E-05 | 1 | 0.214045 | 0.001892278 |
| cg04880968 | 6 | GPX5 | 28501879 | rs72844223 | 6 | 28454035 | G | T | 0.822984 | 0.191147 | 1.67E-05 | 0.822984 | 0.191147 | 1.67E-05 | 1 | 0.0450735 | 0.002364839 |
| cg25285090 | 6 | - | 28510313 | rs916403 | 6 | 28408258 | G | A | 1.28373 | 0.293732 | 1.24E-05 | 1.28373 | 0.293732 | 1.24E-05 | 1 | 0.00527235 | 0.001834176 |
| cg22499720 | 6 | - | 28510491 | rs916403 | 6 | 28408258 | G | A | 0.752639 | 0.172213 | 1.24E-05 | 0.752639 | 0.172213 | 1.24E-05 | 1 | 0.0154838 | 0.001834176 |
| cg05927586 | 6 | SCAND3 | 28543043 | rs139164135 | 6 | 28385882 | T | C | -1.28493 | 0.357738 | 0.000328449 | -1.28493 | 0.357738 | 0.000328449 | 1 | 0.0152873 | 0.026730522 |
| cg09589105 | 6 | SCAND3 | 28543237 | rs35257859 | 6 | 28562589 | A | G | 0.502562 | 0.0874928 | 9.27E-09 | 0.502562 | 0.0874928 | 9.27E-09 | 1 | 0.089443 | 4.18E-06 |
| cg17515793 | 6 | SCAND3 | 28551310 | rs9461458 | 6 | 28355875 | T | C | 0.93457 | 0.196567 | 1.99E-06 | 0.93457 | 0.196567 | 1.99E-06 | 1 | 0.0137031 | 0.000420563 |
| cg04664126 | 6 | SCAND3 | 28554262 | rs2531818 | 6 | 28453102 | C | G | 1.2382 | 0.330147 | 0.000176573 | 1.2382 | 0.330147 | 0.000176573 | 1 | 0.0135796 | 0.016301511 |
| cg22867156 | 6 | SCAND3 | 28555664 | rs2531818 | 6 | 28453102 | C | G | 0.645352 | 0.172073 | 0.000176573 | 0.645352 | 0.172073 | 0.000176573 | 1 | 0.0507133 | 0.016301511 |
| cg23534802 | 6 | SCAND3 | 28555742 | rs7766356 | 6 | 28400538 | C | T | 0.917736 | 0.159986 | 9.70E-09 | 0.917736 | 0.159986 | 9.70E-09 | 1 | 0.0289797 | 4.31E-06 |
| cg12471227 | 6 | SCAND3 | 28555918 | rs7766356 | 6 | 28400538 | C | T | 0.901181 | 0.1571 | 9.70E-09 | 0.901181 | 0.1571 | 9.70E-09 | 1 | 0.0300591 | 4.31E-06 |
| cg02096229 | 6 | SCAND3 | 28555929 | rs7766356 | 6 | 28400538 | C | T | 0.667546 | 0.116371 | 9.70E-09 | 0.734127 | 0.103832 | 1.56E-12 | 2 | 0.0831299 | 1.47E-09 |
| cg03439606 | 6 | - | 28574505 | rs116640481 | 6 | 28534447 | A | G | 1.86837 | 0.405227 | 4.02E-06 | 1.86837 | 0.405227 | 4.02E-06 | 1 | 0.00998915 | 0.000755684 |
| cg04602387 | 6 | - | 28574592 | rs114584960 | 6 | 28517354 | C | T | 0.717254 | 0.155899 | 4.21E-06 | 0.717254 | 0.155899 | 4.21E-06 | 1 | 0.0690403 | 0.000787028 |
| cg27422722 | 6 | - | 28574662 | rs72844226 | 6 | 28466440 | A | G | -1.21621 | 0.277931 | 1.21E-05 | -1.21621 | 0.277931 | 1.21E-05 | 1 | 0.0215624 | 0.001799601 |
| cg03470207 | 6 | - | 28574981 | rs141393790 | 6 | 28420036 | A | G | -1.26043 | 0.292297 | 1.62E-05 | -1.26043 | 0.292297 | 1.62E-05 | 1 | 0.0193412 | 0.002300709 |
| cg02246609 | 6 | - | 28584003 | rs72844226 | 6 | 28466440 | A | G | 0.181161 | 0.0413992 | 1.21E-05 | 0.181161 | 0.0413992 | 1.21E-05 | 1 | 0.986042 | 0.001799601 |
| cg01309870 | 6 | - | 28584035 | rs72844226 | 6 | 28466440 | A | G | 0.172296 | 0.0393733 | 1.21E-05 | 0.172296 | 0.0393733 | 1.21E-05 | 1 | 1.09017 | 0.001799601 |
| cg12430007 | 6 | - | 28602667 | rs13201752 | 6 | 28331127 | G | A | -1.23894 | 0.251087 | 8.06E-07 | -1.23894 | 0.251087 | 8.06E-07 | 1 | 0.00838653 | 0.000192338 |
| cg12692314 | 6 | - | 28642279 | rs7748643 | 6 | 28659407 | A | G | 0.896489 | 0.263256 | 0.000660805 | 0.896489 | 0.263256 | 0.000660805 | 1 | 0.00742322 | 0.045758525 |
| cg22065894 | 6 | - | 28715027 | rs112033028 | 6 | 28736597 | T | C | 0.551813 | 0.216837 | 0.01093315 | 0.570447 | 0.159097 | 0.000336457 | 2 | 0.0848193 | 0.027218271 |
| cg22686132 | 6 | - | 28725957 | rs213230 | 6 | 28330264 | G | A | 0.507736 | 0.0979012 | 2.15E-07 | 0.484804 | 0.0907547 | 9.22E-08 | 2 | 0.0710954 | 2.90E-05 |
| cg23860269 | 6 | - | 28737944 | rs111621381 | 6 | 28754459 | G | A | -0.634454 | 0.178849 | 0.000389093 | -0.634454 | 0.178849 | 0.000389093 | 1 | 0.0542919 | 0.030531779 |
| cg20883227 | 6 | - | 28742389 | rs34871267 | 6 | 28364232 | A | G | 0.691019 | 0.135258 | 3.25E-07 | 0.691019 | 0.135258 | 3.25E-07 | 1 | 0.0719761 | 8.63E-05 |
| cg06877024 | 6 | - | 28743586 | rs9257171 | 6 | 28744021 | A | G | 0.343093 | 0.0949718 | 0.000303244 | 0.343093 | 0.0949718 | 0.000303244 | 1 | 0.151737 | 0.025069323 |
| cg08957069 | 6 | - | 28743700 | rs115162286 | 6 | 28686084 | G | A | 0.653241 | 0.173504 | 0.0001666 | 0.653241 | 0.173504 | 0.0001666 | 1 | 0.0460669 | 0.01555804 |
| cg11839333 | 6 | - | 28753834 | rs35949109 | 6 | 28025926 | C | T | 1.55128 | 0.33776 | 4.38E-06 | 1.55128 | 0.33776 | 4.38E-06 | 1 | 0.00889594 | 0.000810941 |
| cg23201513 | 6 | - | 28754198 | rs9257181 | 6 | 28754520 | T | C | -1.65852 | 0.347001 | 1.76E-06 | -1.65852 | 0.347001 | 1.76E-06 | 1 | 0.00434667 | 0.000376675 |
| cg25474372 | 6 | - | 28762125 | rs9380092 | 6 | 28766237 | A | G | -0.472167 | 0.124873 | 0.000156134 | -0.472167 | 0.124873 | 0.000156134 | 1 | 0.0338579 | 0.01487193 |
| cg12648520 | 6 | - | 28778195 | rs853685 | 6 | 28288785 | T | C | 1.32316 | 0.248123 | 9.70E-08 | 1.32316 | 0.248123 | 9.70E-08 | 1 | 0.0146325 | 3.02E-05 |
| cg19918208 | 6 | - | 28828364 | rs35883476 | 6 | 28368508 | C | G | 0.183877 | 0.0358913 | 3.01E-07 | 0.188879 | 0.0389128 | 1.21E-06 | 5 | 1.09692 | 0.000275259 |
| cg25104872 | 6 | - | 28828977 | rs36092177 | 6 | 28357807 | T | C | 0.71566 | 0.138787 | 2.52E-07 | 0.71566 | 0.138787 | 2.52E-07 | 1 | 0.0684024 | 6.89E-05 |
| cg25078026 | 6 | - | 28829931 | rs7772827 | 6 | 28301143 | C | T | 1.20334 | 0.248103 | 1.24E-06 | 1.20334 | 0.248103 | 1.24E-06 | 1 | 0.00924722 | 0.000279711 |
| cg16677399 | 6 | - | 28830902 | rs13201681 | 6 | 28394680 | T | C | 0.13871 | 0.0271323 | 3.19E-07 | 0.171764 | 0.0473356 | 0.000284997 | 6 | 2.06556 | 0.023815923 |
| cg06608359 | 6 | - | 28831300 | rs2232429 | 6 | 28359632 | G | T | 0.173376 | 0.0334778 | 2.24E-07 | 0.18422 | 0.0400752 | 4.29E-06 | 3 | 1.40886 | 0.000798225 |
| cg07734926 | 6 | - | 28832358 | rs33932084 | 6 | 28268824 | G | A | -0.962029 | 0.183624 | 1.62E-07 | -0.962029 | 0.183624 | 1.62E-07 | 1 | 0.0385982 | 4.69E-05 |
| cg08658810 | 6 | - | 28832727 | rs3131337 | 6 | 28796071 | C | G | -0.553301 | 0.133551 | 3.43E-05 | -0.553301 | 0.133551 | 3.43E-05 | 1 | 0.0657452 | 0.004320792 |
| cg22062601 | 6 | - | 28833340 | rs13213152 | 6 | 28349698 | G | A | -1.14077 | 0.225565 | 4.26E-07 | -1.14077 | 0.225565 | 4.26E-07 | 1 | 0.0257395 | 0.000110425 |
| cg09086326 | 6 | - | 28863910 | rs115009016 | 6 | 28830477 | C | T | 1.00984 | 0.280154 | 0.000312722 | 1.00984 | 0.280154 | 0.000312722 | 1 | 0.0165862 | 0.025652609 |
| cg08502490 | 6 | - | 28864024 | rs9393944 | 6 | 29078234 | A | G | 0.53979 | 0.160016 | 0.000742697 | 0.53979 | 0.160016 | 0.000742697 | 1 | 0.0512726 | 0.049856677 |
| cg05185994 | 6 | - | 28864052 | rs58958115 | 6 | 28831535 | G | A | 0.41764 | 0.113684 | 0.000239146 | 0.41764 | 0.113684 | 0.000239146 | 1 | 0.0929093 | 0.02077684 |
| cg22574586 | 6 | TRIM27 | 28886380 | rs9393944 | 6 | 29078234 | A | G | 1.0064 | 0.298338 | 0.000742697 | 1.0064 | 0.298338 | 0.000742697 | 1 | 0.0145092 | 0.049856677 |
| cg21160062 | 6 | TRIM27 | 28890518 | rs3130715 | 6 | 29109197 | A | G | 1.0419 | 0.202392 | 2.64E-07 | 1.0419 | 0.202392 | 2.64E-07 | 1 | 0.0317342 | 7.18E-05 |
| cg12835326 | 6 | - | 28895181 | rs1016471 | 6 | 28851047 | T | C | -0.887282 | 0.21148 | 2.72E-05 | -0.887282 | 0.21148 | 2.72E-05 | 1 | 0.0181799 | 0.003575005 |
| cg03115379 | 6 | - | 28921288 | rs114507697 | 6 | 28748715 | C | T | 0.663095 | 0.182073 | 0.000270685 | 0.663095 | 0.182073 | 0.000270685 | 1 | 0.0404052 | 0.0229152 |
| cg09633604 | 6 | - | 28921499 | rs1041881 | 6 | 28779887 | G | C | 0.519217 | 0.136233 | 0.000138309 | 0.519217 | 0.136233 | 0.000138309 | 1 | 0.0746235 | 0.013483026 |
| cg08234168 | 6 | - | 28921733 | rs114607660 | 6 | 28754072 | A | G | 0.41592 | 0.116608 | 0.000361423 | 0.37901 | 0.0965466 | 8.65E-05 | 2 | 0.316379 | 0.009198333 |
| cg20841648 | 6 | - | 28921744 | rs72853522 | 6 | 28883688 | C | T | 0.374753 | 0.0979683 | 0.000130688 | 0.42315 | 0.0804259 | 1.43E-07 | 3 | 0.324265 | 4.21E-05 |
| cg22489957 | 6 | - | 28921805 | rs57558053 | 6 | 28753779 | A | C | 0.27318 | 0.0781482 | 0.000472971 | 0.357686 | 0.0792697 | 6.42E-06 | 3 | 0.449154 | 0.00109899 |
| cg18236617 | 6 | - | 28921848 | rs1056032 | 6 | 28870975 | T | C | 0.340559 | 0.0937001 | 0.000278522 | 0.340559 | 0.0937001 | 0.000278522 | 1 | 0.147622 | 0.023467264 |
| cg24126967 | 6 | - | 28945500 | rs3116831 | 6 | 29178138 | C | G | 0.183015 | 0.0571398 | 0.001360429 | 0.224444 | 0.0547798 | 4.18E-05 | 5 | 0.765684 | 0.005095943 |
| cg04851089 | 6 | - | 28953923 | rs3131344 | 6 | 28775322 | A | G | -0.656419 | 0.131763 | 6.31E-07 | -0.656419 | 0.131763 | 6.31E-07 | 1 | 0.0491525 | 0.000155681 |
| cg05852177 | 6 | - | 28954110 | rs209181 | 6 | 28792477 | A | G | -0.947961 | 0.165459 | 1.01E-08 | -0.947961 | 0.165459 | 1.01E-08 | 1 | 0.0333502 | 4.43E-06 |
| cg25508679 | 6 | - | 28956403 | rs3130826 | 6 | 29181314 | G | A | 0.412769 | 0.126856 | 0.0011387 | 0.402304 | 0.118068 | 0.000655959 | 2 | 0.0579652 | 0.04546478 |
| cg19380578 | 6 | ZNF311 | 28968973 | rs7745220 | 6 | 28919625 | A | G | 0.611044 | 0.170433 | 0.000336849 | 0.611044 | 0.170433 | 0.000336849 | 1 | 0.0445386 | 0.027236392 |
| cg00105025 | 6 | ZNF311 | 28973483 | rs7754402 | 6 | 29328834 | C | T | 0.920259 | 0.253695 | 0.000286334 | 0.920259 | 0.253695 | 0.000286334 | 1 | 0.0078018 | 0.023903025 |
| cg11314471 | 6 | - | 28979273 | rs34218844 | 6 | 28290647 | C | T | 0.631435 | 0.122541 | 2.57E-07 | 0.631435 | 0.122541 | 2.57E-07 | 1 | 0.088412 | 7.02E-05 |
| cg08789053 | 6 | - | 28979437 | rs35017208 | 6 | 28345282 | T | C | 1.1552 | 0.223848 | 2.47E-07 | 1.1552 | 0.223848 | 2.47E-07 | 1 | 0.0261976 | 6.75E-05 |
| cg07653363 | 6 | - | 28980392 | rs33932084 | 6 | 28268824 | G | A | 0.814723 | 0.155507 | 1.62E-07 | 0.814723 | 0.155507 | 1.62E-07 | 1 | 0.0539003 | 4.69E-05 |
| cg06047130 | 6 | - | 28980609 | rs3117142 | 6 | 29030195 | T | C | -0.852212 | 0.162835 | 1.67E-07 | -0.928874 | 0.245324 | 0.00015295 | 2 | 0.0536379 | 0.014611547 |
| cg22834713 | 6 | - | 28984341 | rs2232429 | 6 | 28359632 | G | T | -0.421851 | 0.0814566 | 2.24E-07 | -0.356576 | 0.0955351 | 0.000189711 | 4 | 0.307214 | 0.017303118 |
| cg18137931 | 6 | - | 28984374 | rs35883476 | 6 | 28368508 | C | G | -0.565436 | 0.110369 | 3.01E-07 | -0.466149 | 0.117871 | 7.67E-05 | 2 | 0.184734 | 0.008323725 |
| cg00719211 | 6 | - | 28984453 | rs34218844 | 6 | 28290647 | C | T | -0.645861 | 0.125341 | 2.57E-07 | -0.691593 | 0.114657 | 1.63E-09 | 2 | 0.116787 | 8.48E-07 |
| cg01885291 | 6 | - | 28984832 | rs1311911 | 6 | 28705074 | T | G | -1.07371 | 0.229829 | 2.99E-06 | -0.91636 | 0.188522 | 1.17E-06 | 2 | 0.0457646 | 0.000266611 |
| cg02755847 | 6 | - | 29232651 | rs72844224 | 6 | 28458102 | A | G | 1.06561 | 0.239357 | 8.52E-06 | 1.06561 | 0.239357 | 8.52E-06 | 1 | 0.0290567 | 0.001370883 |
| cg01553182 | 6 | OR12D3 | 29342533 | rs55690788 | 6 | 28436145 | C | T | 1.99522 | 0.397828 | 5.30E-07 | 1.65376 | 0.375575 | 1.07E-05 | 1 | 0.00712879 | 0.001626026 |
| cg03608577 | 6 | OR12D3 | 29342679 | rs34676049 | 6 | 28453618 | G | T | -0.942731 | 0.189423 | 6.47E-07 | -0.942731 | 0.189423 | 6.47E-07 | 1 | 0.0368895 | 0.000158743 |
| cg02274336 | 6 | OR2H1 | 29427807 | rs55690788 | 6 | 28436145 | C | T | 1.01551 | 0.202482 | 5.30E-07 | 1.01551 | 0.202482 | 5.30E-07 | 1 | 0.0322176 | 0.000133936 |
| cg15094605 | 6 | OR2H1 | 29429346 | rs1362078 | 6 | 29438604 | G | A | 0.0833306 | 0.0288838 | 0.003913863 | 0.153654 | 0.0377823 | 4.77E-05 | 7 | 3.16518 | 0.005646207 |
| cg06760467 | 6 | - | 29496514 | rs2523425 | 6 | 29494241 | T | C | 0.526266 | 0.127702 | 3.77E-05 | 0.526266 | 0.127702 | 3.77E-05 | 1 | 0.0284214 | 0.004691608 |
| cg10625096 | 6 | - | 29518072 | rs2745409 | 6 | 29501924 | G | A | 0.576134 | 0.131374 | 1.16E-05 | 0.576134 | 0.131374 | 1.16E-05 | 1 | 0.026987 | 0.00174364 |
| cg10491628 | 6 | - | 29521220 | rs444013 | 6 | 29523646 | G | C | -0.331048 | 0.0795598 | 3.17E-05 | -0.331048 | 0.0795598 | 3.17E-05 | 1 | 0.0736126 | 0.004040835 |
| cg03402459 | 6 | - | 29521407 | rs444013 | 6 | 29523646 | G | C | -0.495418 | 0.119062 | 3.17E-05 | -0.495418 | 0.119062 | 3.17E-05 | 1 | 0.032794 | 0.004040835 |
| cg22305167 | 6 | - | 29521420 | rs11724 | 6 | 29521319 | C | G | -0.482672 | 0.115834 | 3.09E-05 | -0.482672 | 0.115834 | 3.09E-05 | 1 | 0.0346753 | 0.003974199 |
| cg15818307 | 6 | - | 29521430 | rs444013 | 6 | 29523646 | G | C | -0.530978 | 0.127609 | 3.17E-05 | -0.530978 | 0.127609 | 3.17E-05 | 1 | 0.0285457 | 0.004040835 |
| cg21133153 | 6 | - | 29521488 | rs444013 | 6 | 29523646 | G | C | -0.527964 | 0.126884 | 3.17E-05 | -0.527964 | 0.126884 | 3.17E-05 | 1 | 0.028874 | 0.004040835 |
| cg06087185 | 6 | - | 29521499 | rs414390 | 6 | 29509874 | G | A | -0.555022 | 0.134016 | 3.45E-05 | -0.555022 | 0.134016 | 3.45E-05 | 1 | 0.0254909 | 0.004346347 |
| cg06613392 | 6 | - | 29521595 | rs444013 | 6 | 29523646 | G | C | -0.55225 | 0.132721 | 3.17E-05 | -0.540148 | 0.122552 | 1.05E-05 | 2 | 0.0338498 | 0.001603823 |
| cg03409187 | 6 | - | 29521624 | rs444013 | 6 | 29523646 | G | C | -0.703809 | 0.169144 | 3.17E-05 | -0.703809 | 0.169144 | 3.17E-05 | 1 | 0.0162054 | 0.004040835 |
| cg19690984 | 6 | - | 29521631 | rs1233418 | 6 | 29505144 | T | C | -0.658503 | 0.158813 | 3.38E-05 | -0.658503 | 0.158813 | 3.38E-05 | 1 | 0.0181282 | 0.004263546 |
| cg16044251 | 6 | - | 29521695 | rs444013 | 6 | 29523646 | G | C | -0.447681 | 0.10759 | 3.17E-05 | -0.447681 | 0.10759 | 3.17E-05 | 1 | 0.0402022 | 0.004040835 |
| cg18588589 | 6 | - | 29521705 | rs11724 | 6 | 29521319 | C | G | -0.568569 | 0.136448 | 3.09E-05 | -0.568569 | 0.136448 | 3.09E-05 | 1 | 0.0249447 | 0.003974199 |
| cg06378770 | 6 | - | 29521714 | rs1233419 | 6 | 29504513 | T | C | -0.85138 | 0.210121 | 5.08E-05 | -0.85138 | 0.210121 | 5.08E-05 | 1 | 0.0104752 | 0.005920604 |
| cg26131286 | 6 | - | 29521783 | rs724078 | 6 | 29489048 | A | G | -0.495317 | 0.137609 | 0.000318968 | -0.495317 | 0.137609 | 0.000318968 | 1 | 0.0272131 | 0.026076712 |
| cg13206902 | 6 | UBD | 29523786 | rs378956 | 6 | 29522207 | C | T | -0.723528 | 0.169109 | 1.88E-05 | -0.723528 | 0.169109 | 1.88E-05 | 1 | 0.0159576 | 0.002620576 |
| cg01024792 | 6 | UBD | 29524067 | rs3131097 | 6 | 28853197 | G | A | 1.01724 | 0.207745 | 9.77E-07 | 1.01724 | 0.207745 | 9.77E-07 | 1 | 0.0300307 | 0.000228466 |
| cg17987649 | 6 | UBD | 29526534 | rs3135318 | 6 | 28897980 | C | T | 0.867024 | 0.170216 | 3.52E-07 | 0.867024 | 0.170216 | 3.52E-07 | 1 | 0.045264 | 9.27E-05 |
| cg08196667 | 6 | SNORD32B | 29549180 | rs2251892 | 6 | 29833128 | T | C | 1.64833 | 0.29758 | 3.05E-08 | 1.64833 | 0.29758 | 3.05E-08 | 1 | 0.0053838 | 1.13E-05 |
| cg24640415 | 6 | GABBR1 | 29574953 | rs55933609 | 6 | 29654035 | G | A | -1.01365 | 0.253215 | 6.25E-05 | -1.01365 | 0.253215 | 6.25E-05 | 1 | 0.0270771 | 0.006980906 |
| cg14111380 | 6 | GABBR1 | 29576818 | rs3129069 | 6 | 29628094 | T | C | -1.47441 | 0.306417 | 1.50E-06 | -1.47441 | 0.306417 | 1.50E-06 | 1 | 0.00741328 | 0.00032819 |
| cg15154411 | 6 | GABBR1 | 29576987 | rs9261259 | 6 | 30023079 | C | T | -1.8182 | 0.305411 | 2.64E-09 | -1.44379 | 0.246184 | 4.51E-09 | 1 | 0.012911 | 2.15E-06 |
| cg05972518 | 6 | GABBR1 | 29577348 | rs3095267 | 6 | 29607046 | C | G | -2.10404 | 0.385753 | 4.93E-08 | -1.4302 | 0.396561 | 0.000310406 | 1 | 0.00419717 | 0.02553124 |
| cg24962941 | 6 | GABBR1 | 29577916 | rs28359984 | 6 | 29592690 | A | C | -0.166341 | 0.0340566 | 1.04E-06 | -0.171324 | 0.0446631 | 0.00012514 | 5 | 1.39628 | 0.012469179 |
| cg11588423 | 6 | GABBR1 | 29578191 | rs28359966 | 6 | 29578144 | T | C | -0.34289 | 0.0993369 | 0.000556989 | -0.34289 | 0.0993369 | 0.000556989 | 1 | 0.245692 | 0.039970301 |
| cg26569800 | 6 | GABBR1 | 29578313 | rs2747421 | 6 | 29645118 | C | G | -0.670002 | 0.216467 | 0.001967111 | -0.574381 | 0.166528 | 0.000562422 | 2 | 0.0206538 | 0.040219762 |
| cg15370577 | 6 | GABBR1 | 29580340 | rs29224 | 6 | 29581343 | A | T | 1.51968 | 0.316912 | 1.63E-06 | 1.51968 | 0.316912 | 1.63E-06 | 1 | 0.0111161 | 0.000352097 |
| cg07436579 | 6 | GABBR1 | 29581117 | rs28359983 | 6 | 29592679 | A | G | -0.518161 | 0.106088 | 1.04E-06 | -0.522899 | 0.0944302 | 3.08E-08 | 2 | 0.116766 | 1.14E-05 |
| cg21026120 | 6 | GABBR1 | 29581121 | rs28749527 | 6 | 29583750 | A | G | -0.170797 | 0.0344998 | 7.41E-07 | -0.173285 | 0.0342778 | 4.30E-07 | 5 | 1.40792 | 0.000111279 |
| cg26744084 | 6 | GABBR1 | 29581182 | rs29222 | 6 | 29590952 | C | A | -0.650465 | 0.128627 | 4.27E-07 | -0.650465 | 0.128627 | 4.27E-07 | 1 | 0.0716669 | 0.000110487 |
| cg06872047 | 6 | GABBR1 | 29585579 | rs2058326 | 6 | 29582607 | T | G | -0.201042 | 0.0461164 | 1.30E-05 | -0.202069 | 0.0452319 | 7.92E-06 | 2 | 0.58578 | 0.001291208 |
| cg03063857 | 6 | GABBR1 | 29585617 | rs9258260 | 6 | 29723161 | T | C | -1.63364 | 0.34815 | 2.70E-06 | -1.63364 | 0.34815 | 2.70E-06 | 1 | 0.00965027 | 0.000548656 |
| cg16073467 | 6 | GABBR1 | 29586772 | rs28749525 | 6 | 29583342 | T | C | -0.269125 | 0.0553456 | 1.16E-06 | -0.277445 | 0.0689768 | 5.77E-05 | 2 | 0.381274 | 0.006592455 |
| cg04957663 | 6 | GABBR1 | 29587487 | rs17184416 | 6 | 29593478 | G | A | -0.283359 | 0.0578515 | 9.69E-07 | -0.283359 | 0.0578515 | 9.69E-07 | 1 | 0.353151 | 0.000227118 |
| cg06538238 | 6 | GABBR1 | 29588575 | rs1233374 | 6 | 29608694 | C | T | 0.870507 | 0.168654 | 2.45E-07 | 0.870507 | 0.168654 | 2.45E-07 | 1 | 0.0406506 | 6.75E-05 |
| cg18004110 | 6 | GABBR1 | 29589729 | rs3129033 | 6 | 29660982 | C | G | 0.367979 | 0.105871 | 0.000509553 | 0.367979 | 0.105871 | 0.000509553 | 1 | 0.0539995 | 0.037553626 |
| cg03810301 | 6 | GABBR1 | 29590017 | rs28359962 | 6 | 29562588 | T | G | 0.414619 | 0.121571 | 0.000648517 | 0.414619 | 0.121571 | 0.000648517 | 1 | 0.165463 | 0.045122574 |
| cg22098375 | 6 | GABBR1 | 29590966 | rs740883 | 6 | 29575405 | T | A | 1.04607 | 0.208064 | 4.97E-07 | 1.04607 | 0.208064 | 4.97E-07 | 1 | 0.0261198 | 0.000125996 |
| cg17930583 | 6 | GABBR1 | 29591082 | rs9468589 | 6 | 29671043 | T | G | 0.964607 | 0.229645 | 2.67E-05 | 0.964607 | 0.229645 | 2.67E-05 | 1 | 0.01869 | 0.003513683 |
| cg04615964 | 6 | GABBR1 | 29591153 | rs448380 | 6 | 29647545 | C | T | 0.281426 | 0.0911483 | 0.002018196 | 0.284312 | 0.0829678 | 0.00061091 | 2 | 0.0878471 | 0.042892514 |
| cg01176329 | 6 | GABBR1 | 29592381 | rs448380 | 6 | 29647545 | C | T | 0.198681 | 0.0643488 | 0.002018196 | 0.183615 | 0.0532961 | 0.000570764 | 2 | 0.207318 | 0.040601409 |
| cg08027810 | 6 | GABBR1 | 29593479 | rs28359974 | 6 | 29585684 | C | T | 0.137429 | 0.0278782 | 8.25E-07 | 0.151653 | 0.0244383 | 5.47E-10 | 6 | 2.09287 | 3.23E-07 |
| cg05115679 | 6 | GABBR1 | 29593490 | rs28359974 | 6 | 29585684 | C | T | 0.306796 | 0.0622352 | 8.25E-07 | 0.312 | 0.0564712 | 3.30E-08 | 2 | 0.328715 | 1.20E-05 |
| cg21879791 | 6 | GABBR1 | 29594830 | rs28893512 | 6 | 29560289 | C | G | 0.134019 | 0.0586605 | 0.02233327 | 0.19501 | 0.0534836 | 0.000266249 | 4 | 0.943366 | 0.022669883 |
| cg05812266 | 6 | GABBR1 | 29595194 | rs62392957 | 6 | 29649219 | A | G | 0.225907 | 0.0568027 | 6.98E-05 | 0.17414 | 0.0502473 | 0.000529033 | 3 | 1.1579 | 0.038511589 |
| cg24302412 | 6 | GABBR1 | 29595196 | rs4085264 | 6 | 29645885 | A | G | 0.257962 | 0.0648528 | 6.96E-05 | 0.196152 | 0.0489185 | 6.08E-05 | 3 | 0.928466 | 0.006841006 |
| cg08862148 | 6 | GABBR1 | 29595315 | rs62392957 | 6 | 29649219 | A | G | 0.197965 | 0.0497769 | 6.98E-05 | 0.181558 | 0.0384262 | 2.31E-06 | 4 | 1.2345 | 0.00047857 |
| cg02014853 | 6 | GABBR1 | 29595335 | rs62392957 | 6 | 29649219 | A | G | 0.189466 | 0.0476398 | 6.98E-05 | 0.169933 | 0.0372485 | 5.07E-06 | 3 | 1.30533 | 0.000908911 |
| cg25729445 | 6 | GABBR1 | 29595347 | rs62392958 | 6 | 29650196 | T | C | 0.24285 | 0.060596 | 6.13E-05 | 0.225951 | 0.0484346 | 3.09E-06 | 3 | 0.7623 | 0.000601063 |
| cg00594408 | 6 | GABBR1 | 29595349 | rs2057010 | 6 | 29579986 | A | C | 0.191216 | 0.0542757 | 0.000426703 | 0.191728 | 0.0456587 | 2.68E-05 | 2 | 0.998094 | 0.003530424 |
| cg20997792 | 6 | GABBR1 | 29595491 | rs2057010 | 6 | 29579986 | A | C | 0.201063 | 0.0570709 | 0.000426703 | 0.203829 | 0.0501368 | 4.80E-05 | 2 | 0.80492 | 0.005671546 |
| cg04335343 | 6 | GABBR1 | 29597113 | rs62391786 | 6 | 29674288 | T | C | 0.526068 | 0.132352 | 7.05E-05 | 0.526068 | 0.132352 | 7.05E-05 | 1 | 0.100509 | 0.007699253 |
| cg14841796 | 6 | GABBR1 | 29598285 | rs3117313 | 6 | 29657808 | A | G | -1.43641 | 0.341601 | 2.61E-05 | -1.43641 | 0.341601 | 2.61E-05 | 1 | 0.0121114 | 0.003455319 |
| cg08415141 | 6 | GABBR1 | 29598310 | rs62392954 | 6 | 29647727 | A | G | -0.59354 | 0.148328 | 6.30E-05 | -0.59354 | 0.148328 | 6.30E-05 | 1 | 0.0801943 | 0.00701086 |
| cg01765653 | 6 | GABBR1 | 29599160 | rs29224 | 6 | 29581343 | A | T | -0.400936 | 0.0836108 | 1.63E-06 | -0.376945 | 0.0705979 | 9.35E-08 | 3 | 0.274943 | 2.93E-05 |
| cg20139800 | 6 | GABBR1 | 29599178 | rs28749528 | 6 | 29583846 | T | C | -0.461724 | 0.0928998 | 6.70E-07 | -0.416747 | 0.0766366 | 5.40E-08 | 3 | 0.236873 | 1.86E-05 |
| cg06519422 | 6 | GABBR1 | 29599226 | rs29224 | 6 | 29581343 | A | T | -0.393725 | 0.0821071 | 1.63E-06 | -0.370077 | 0.0803519 | 4.11E-06 | 3 | 0.261295 | 0.000772118 |
| cg21644740 | 6 | GABBR1 | 29599248 | rs29224 | 6 | 29581343 | A | T | -0.425333 | 0.0886986 | 1.63E-06 | -0.434004 | 0.107153 | 5.12E-05 | 3 | 0.227142 | 0.005946629 |
| cg12991385 | 6 | GABBR1 | 29599259 | rs29224 | 6 | 29581343 | A | T | -0.424964 | 0.0886217 | 1.63E-06 | -0.377316 | 0.0856725 | 1.06E-05 | 3 | 0.249353 | 0.001620845 |
| cg17806418 | 6 | GABBR1 | 29599319 | rs28749525 | 6 | 29583342 | T | C | -0.398377 | 0.0819263 | 1.16E-06 | -0.356519 | 0.0780553 | 4.94E-06 | 3 | 0.287536 | 0.000891859 |
| cg22679406 | 6 | GABBR1 | 29599331 | rs29224 | 6 | 29581343 | A | T | -0.37242 | 0.0776642 | 1.63E-06 | -0.343373 | 0.0723177 | 2.06E-06 | 3 | 0.305902 | 0.000432247 |
| cg06512249 | 6 | GABBR1 | 29599390 | rs28749525 | 6 | 29583342 | T | C | -0.453063 | 0.0931726 | 1.16E-06 | -0.425474 | 0.122517 | 0.000515194 | 2 | 0.139061 | 0.037844021 |
| cg11209538 | 6 | GABBR1 | 29600112 | rs17854216 | 6 | 29581113 | G | A | -0.977861 | 0.203922 | 1.63E-06 | -0.977861 | 0.203922 | 1.63E-06 | 1 | 0.0273069 | 0.000352097 |
| cg25774457 | 6 | GABBR1 | 29600114 | rs740883 | 6 | 29575405 | T | A | -0.858612 | 0.170779 | 4.97E-07 | -0.858612 | 0.170779 | 4.97E-07 | 1 | 0.0389292 | 0.000125996 |
| cg19022254 | 6 | GABBR1 | 29601705 | rs2057009 | 6 | 29579999 | A | T | 0.145988 | 0.0565874 | 0.009884093 | 0.240903 | 0.0593346 | 4.91E-05 | 7 | 0.666648 | 0.005795421 |
| cg09740560 | 6 | GABBR1 | 29602390 | rs4085264 | 6 | 29645885 | A | G | -0.325055 | 0.0817204 | 6.96E-05 | -0.318284 | 0.0934712 | 0.000661358 | 3 | 0.296578 | 0.045758525 |
| cg00433866 | 6 | MOG | 29623646 | rs448489 | 6 | 29647642 | C | T | -0.109226 | 0.0353247 | 0.001987992 | -0.119416 | 0.0334805 | 0.00036153 | 3 | 0.582436 | 0.028949005 |
| cg17242574 | 6 | MOG | 29625991 | rs2747421 | 6 | 29645118 | C | G | -0.408725 | 0.132052 | 0.001967111 | -0.419677 | 0.122975 | 0.000643299 | 2 | 0.0401716 | 0.044778734 |
| cg05813221 | 6 | MOG | 29629988 | rs3129062 | 6 | 29645937 | T | C | -0.0946103 | 0.0305841 | 0.001978582 | -0.110062 | 0.031904 | 0.000561087 | 4 | 0.78605 | 0.040141994 |
| cg23266797 | 6 | MOG | 29636003 | rs3116814 | 6 | 29660394 | G | A | -0.447815 | 0.12884 | 0.000509553 | -0.447815 | 0.12884 | 0.000509553 | 1 | 0.0364241 | 0.037553626 |
| cg17625506 | 6 | HLA-F | 29691726 | rs2235383 | 6 | 29693499 | G | A | 0.477238 | 0.120446 | 7.43E-05 | 0.527493 | 0.0990678 | 1.01E-07 | 2 | 0.0889964 | 3.15E-05 |
| cg24952408 | 6 | LOC285830 | 29696264 | rs9258170 | 6 | 29689590 | G | T | -0.662636 | 0.167404 | 7.55E-05 | -0.662636 | 0.167404 | 7.55E-05 | 1 | 0.0344188 | 0.008205422 |
| cg12296326 | 6 | LOC285830 | 29717114 | rs4947236 | 6 | 29723674 | C | T | -1.50096 | 0.260871 | 8.76E-09 | -1.50096 | 0.260871 | 8.76E-09 | 1 | 0.00701609 | 4.00E-06 |
| cg09029526 | 6 | - | 29720653 | rs3094063 | 6 | 30344281 | C | T | -1.15709 | 0.225911 | 3.03E-07 | -1.15709 | 0.225911 | 3.03E-07 | 1 | 0.0316975 | 8.12E-05 |
| cg18877200 | 6 | - | 29720927 | rs6910944 | 6 | 29722160 | A | G | -0.842091 | 0.143955 | 4.94E-09 | -0.842091 | 0.143955 | 4.94E-09 | 1 | 0.0232539 | 2.35E-06 |
| cg12635048 | 6 | - | 29720957 | rs4713243 | 6 | 29720961 | G | C | -1.65384 | 0.287057 | 8.37E-09 | -1.60188 | 0.280008 | 1.06E-08 | 1 | 0.00606718 | 4.60E-06 |
| cg17221604 | 6 | - | 29720989 | rs4713243 | 6 | 29720961 | G | C | 0.255085 | 0.044275 | 8.37E-09 | 0.270567 | 0.0625372 | 1.52E-05 | 4 | 0.315093 | 0.002171239 |
| cg16489427 | 6 | - | 29721015 | rs12665401 | 6 | 29717380 | C | T | 1.62823 | 0.38117 | 1.94E-05 | 1.62823 | 0.38117 | 1.94E-05 | 1 | 0.00349041 | 0.002681342 |
| cg05216332 | 6 | HCG4 | 29760634 | rs1737028 | 6 | 29737993 | G | C | 0.342787 | 0.0964751 | 0.000380786 | 0.342787 | 0.0964751 | 0.000380786 | 1 | 0.0525776 | 0.030127834 |
| cg12154624 | 6 | HCG4 | 29760754 | rs2523753 | 6 | 29734727 | G | A | -0.325987 | 0.115106 | 0.004625139 | -0.322066 | 0.085501 | 0.000165396 | 2 | 0.189192 | 0.015490218 |
| cg11278602 | 6 | HCG4 | 29760757 | rs3094092 | 6 | 30657015 | T | C | -0.30661 | 0.058133 | 1.34E-07 | -0.335784 | 0.0926941 | 0.000291853 | 5 | 0.903941 | 0.024265244 |
| cg10666224 | 6 | - | 29768246 | rs1633024 | 6 | 29746657 | G | C | -0.349299 | 0.0983544 | 0.000383227 | -0.349299 | 0.0983544 | 0.000383227 | 1 | 0.0504772 | 0.030232422 |
| cg07315937 | 6 | - | 29768269 | rs1633031 | 6 | 29744934 | C | T | -0.210975 | 0.0594055 | 0.000383227 | -0.214005 | 0.0552138 | 0.000106258 | 2 | 0.187902 | 0.010972151 |
| cg13322920 | 6 | - | 29768622 | rs1633024 | 6 | 29746657 | G | C | -0.535257 | 0.150716 | 0.000383227 | -0.535257 | 0.150716 | 0.000383227 | 1 | 0.0214306 | 0.030232422 |
| cg19141489 | 6 | HLA-G | 29796068 | rs2517928 | 6 | 29745350 | T | C | -0.15657 | 0.059316 | 0.008300514 | -0.207398 | 0.0565001 | 0.000241901 | 3 | 0.213854 | 0.020937675 |
| cg05923350 | 6 | - | 29810094 | rs4713232 | 6 | 29666308 | G | A | 0.945909 | 0.228653 | 3.52E-05 | 0.945909 | 0.228653 | 3.52E-05 | 1 | 0.0101015 | 0.004427043 |
| cg04246123 | 6 | HCG4P6 | 29893273 | rs2517718 | 6 | 29916391 | C | A | -0.11153 | 0.0284637 | 8.92E-05 | -0.11489 | 0.0289297 | 7.15E-05 | 5 | 1.12779 | 0.007799836 |
| cg26647265 | 6 | - | 29932621 | rs9260740 | 6 | 29933236 | T | C | -0.276114 | 0.0733169 | 0.000165912 | -0.276114 | 0.0733169 | 0.000165912 | 1 | 0.15567 | 0.015507038 |
| cg17639394 | 6 | HCG9 | 29943480 | rs2735076 | 6 | 29943490 | A | G | 0.106807 | 0.0417074 | 0.010441 | 0.164632 | 0.0474417 | 0.000520176 | 5 | 0.65573 | 0.03810633 |
| cg06344336 | 6 | HLA-J | 29973557 | rs9393987 | 6 | 30009169 | T | C | 0.254922 | 0.087382 | 0.003530554 | 0.276623 | 0.080093 | 0.000552888 | 2 | 0.084207 | 0.039748356 |
| cg19448822 | 6 | HLA-J | 29974773 | rs259943 | 6 | 30015330 | C | T | -0.187365 | 0.0470244 | 6.77E-05 | -0.215483 | 0.0474691 | 5.65E-06 | 3 | 0.308949 | 0.000983172 |
| cg13207333 | 6 | HLA-J | 29974798 | rs259943 | 6 | 30015330 | C | T | -0.175276 | 0.0439903 | 6.77E-05 | -0.200985 | 0.0408311 | 8.56E-07 | 3 | 0.359949 | 0.000203561 |
| cg18713646 | 6 | HLA-J | 29974952 | rs259943 | 6 | 30015330 | C | T | -0.152968 | 0.0383916 | 6.77E-05 | -0.193007 | 0.0544288 | 0.000391128 | 4 | 0.462141 | 0.030661742 |
| cg21330423 | 6 | HLA-J | 29975068 | rs259943 | 6 | 30015330 | C | T | -0.240221 | 0.06029 | 6.77E-05 | -0.265799 | 0.0577598 | 4.19E-06 | 3 | 0.203412 | 0.000783979 |
| cg14221939 | 6 | NCRNA00171 | 29981675 | rs2235383 | 6 | 29693499 | G | A | -0.135559 | 0.0342125 | 7.43E-05 | -0.182881 | 0.042985 | 2.10E-05 | 4 | 1.23189 | 0.002855788 |
| cg06889979 | 6 | NCRNA00171 | 29987491 | rs2394255 | 6 | 29949821 | G | A | 0.452492 | 0.131935 | 0.000604456 | 0.452492 | 0.131935 | 0.000604456 | 1 | 0.0254566 | 0.042661149 |
| cg26822366 | 6 | NCRNA00171 | 29989495 | rs259943 | 6 | 30015330 | C | T | -0.994939 | 0.249707 | 6.77E-05 | -0.994939 | 0.249707 | 6.77E-05 | 1 | 0.00870304 | 0.007447284 |
| cg12910752 | 6 | NCRNA00171 | 29991837 | rs2844796 | 6 | 30072511 | A | G | 0.776837 | 0.176845 | 1.12E-05 | 0.776837 | 0.176845 | 1.12E-05 | 1 | 0.0197477 | 0.001693846 |
| cg17554685 | 6 | NCRNA00171 | 30026312 | rs3998770 | 6 | 29738042 | C | T | -0.456068 | 0.111467 | 4.29E-05 | -0.381329 | 0.104372 | 0.000258692 | 2 | 0.21365 | 0.022072801 |
| cg17197870 | 6 | ZNRD1 | 30027916 | rs9261387 | 6 | 30061361 | T | C | -0.336728 | 0.0956419 | 0.000430461 | -0.336728 | 0.0956419 | 0.000430461 | 1 | 0.16897 | 0.032901924 |
| cg01504212 | 6 | ZNRD1 | 30027963 | rs3130253 | 6 | 29634012 | A | G | -0.6695 | 0.185124 | 0.000298687 | -0.6695 | 0.185124 | 0.000298687 | 1 | 0.0441743 | 0.024740462 |
| cg05663643 | 6 | ZNRD1 | 30028250 | rs3094144 | 6 | 30000520 | A | C | -0.543441 | 0.148038 | 0.000241713 | -0.543441 | 0.148038 | 0.000241713 | 1 | 0.0201559 | 0.020932535 |
| cg07468289 | 6 | ZNRD1 | 30030010 | rs2517690 | 6 | 29929073 | T | C | -0.293559 | 0.0527619 | 2.65E-08 | -0.394782 | 0.0841711 | 2.73E-06 | 4 | 0.425006 | 0.000553063 |
| cg21317279 | 6 | ZNRD1 | 30031893 | rs1150739 | 6 | 30031345 | C | T | -0.464135 | 0.12674 | 0.000250208 | -0.464135 | 0.12674 | 0.000250208 | 1 | 0.0288264 | 0.021439202 |
| cg23939808 | 6 | RNF39 | 30043097 | rs4713422 | 6 | 30999902 | C | G | -1.13725 | 0.157752 | 5.67E-13 | -1.13725 | 0.157752 | 5.67E-13 | 1 | 0.0193742 | 5.81E-10 |
| cg13009440 | 6 | - | 30068851 | rs9257799 | 6 | 29339271 | C | T | -0.733731 | 0.178687 | 4.02E-05 | -0.733731 | 0.178687 | 4.02E-05 | 1 | 0.0317409 | 0.004949287 |
| cg23161794 | 6 | - | 30068942 | rs1150739 | 6 | 30031345 | C | T | -0.570291 | 0.155727 | 0.000250208 | -0.570291 | 0.155727 | 0.000250208 | 1 | 0.0190531 | 0.021439202 |
| cg22121388 | 6 | - | 30069873 | rs3115635 | 6 | 29980493 | T | C | 0.88721 | 0.242891 | 0.000259561 | 0.88721 | 0.242891 | 0.000259561 | 1 | 0.00742219 | 0.02213529 |
| cg26418137 | 6 | - | 30070059 | rs1116222 | 6 | 30071279 | G | T | 0.729689 | 0.170912 | 1.96E-05 | 0.729689 | 0.170912 | 1.96E-05 | 1 | 0.0195125 | 0.002700312 |
| cg18504015 | 6 | - | 30070062 | rs2523994 | 6 | 30070346 | C | A | 0.703593 | 0.149748 | 2.62E-06 | 0.658326 | 0.123846 | 1.06E-07 | 2 | 0.0362212 | 3.27E-05 |
| cg12152443 | 6 | TRIM31 | 30070968 | rs1610638 | 6 | 29740477 | T | C | -1.98753 | 0.34062 | 5.40E-09 | -1.43089 | 0.330357 | 1.48E-05 | 1 | 0.00465295 | 0.0021279 |
| cg18502917 | 6 | TRIM31 | 30070992 | rs1110446 | 6 | 30070937 | T | C | -0.633498 | 0.155522 | 4.64E-05 | -0.633498 | 0.155522 | 4.64E-05 | 1 | 0.0260258 | 0.00551452 |
| cg00799826 | 6 | TRIM31 | 30071200 | rs1110446 | 6 | 30070937 | T | C | 1.03308 | 0.253619 | 4.64E-05 | 1.03308 | 0.253619 | 4.64E-05 | 1 | 0.00968355 | 0.00551452 |
| cg26057104 | 6 | TRIM31 | 30071344 | rs1116221 | 6 | 30071330 | T | C | -0.302216 | 0.0699061 | 1.54E-05 | -0.302216 | 0.0699061 | 1.54E-05 | 1 | 0.117201 | 0.00220237 |
| cg10222823 | 6 | TRIM31 | 30071349 | rs6457148 | 6 | 30066713 | T | C | -0.670059 | 0.139617 | 1.59E-06 | -0.670059 | 0.139617 | 1.59E-06 | 1 | 0.0315717 | 0.000346066 |
| cg18297538 | 6 | TRIM31 | 30071373 | rs2524005 | 6 | 29899677 | A | G | -0.597392 | 0.127294 | 2.70E-06 | -0.597392 | 0.127294 | 2.70E-06 | 1 | 0.0430517 | 0.00054751 |
| cg08918709 | 6 | TRIM31 | 30074219 | rs2517910 | 6 | 29688501 | A | C | -0.798074 | 0.171727 | 3.37E-06 | -0.798074 | 0.171727 | 3.37E-06 | 1 | 0.0155631 | 0.000645027 |
| cg04792216 | 6 | TRIM31 | 30075057 | rs2844787 | 6 | 30140913 | G | T | -0.289766 | 0.0826145 | 0.000452514 | -0.289766 | 0.0826145 | 0.000452514 | 1 | 0.0997996 | 0.034136869 |
| cg00679556 | 6 | TRIM31 | 30080782 | rs9261439 | 6 | 30090337 | A | G | 0.382204 | 0.121323 | 0.001631105 | 0.373673 | 0.109745 | 0.000661939 | 2 | 0.0452891 | 0.045758525 |
| cg22692281 | 6 | TRIM40 | 30104900 | rs9261486 | 6 | 30109063 | A | G | -0.293602 | 0.0784747 | 0.000183086 | -0.293602 | 0.0784747 | 0.000183086 | 1 | 0.101995 | 0.016797578 |
| cg05681072 | 6 | TRIM40 | 30104982 | rs9261502 | 6 | 30111610 | T | A | -0.813012 | 0.202733 | 6.07E-05 | -0.813012 | 0.202733 | 6.07E-05 | 1 | 0.0146433 | 0.006836126 |
| cg06317173 | 6 | TRIM40 | 30107366 | rs1557610 | 6 | 30118488 | A | T | 0.541726 | 0.143962 | 0.000167947 | 0.541726 | 0.143962 | 0.000167947 | 1 | 0.0307302 | 0.015665754 |
| cg02081466 | 6 | TRIM40 | 30108786 | rs1557609 | 6 | 30118489 | C | T | -0.972113 | 0.238807 | 4.69E-05 | -0.972113 | 0.238807 | 4.69E-05 | 1 | 0.0104609 | 0.00556546 |
| cg23481243 | 6 | TRIM40 | 30112493 | rs2239530 | 6 | 30152115 | G | C | -0.819801 | 0.227376 | 0.000311652 | -0.819801 | 0.227376 | 0.000311652 | 1 | 0.0120816 | 0.025581816 |
| cg18835549 | 6 | TRIM40 | 30112582 | rs2022065 | 6 | 30121460 | T | C | -0.519399 | 0.137342 | 0.000155756 | -0.519399 | 0.137342 | 0.000155756 | 1 | 0.0281139 | 0.014844647 |
| cg05389989 | 6 | TRIM40 | 30113995 | rs9261473 | 6 | 30105544 | A | C | -0.615403 | 0.165201 | 0.000195232 | -0.615403 | 0.165201 | 0.000195232 | 1 | 0.023169 | 0.017671939 |
| cg17259143 | 6 | TRIM40 | 30114039 | rs1557610 | 6 | 30118488 | A | T | -0.775243 | 0.206018 | 0.000167947 | -0.775243 | 0.206018 | 0.000167947 | 1 | 0.0149132 | 0.015665754 |
| cg00126536 | 6 | TRIM40 | 30115323 | rs2285796 | 6 | 30120450 | T | G | -0.349602 | 0.0868084 | 5.65E-05 | -0.349602 | 0.0868084 | 5.65E-05 | 1 | 0.081464 | 0.006467854 |
| cg09016806 | 6 | TRIM10 | 30120365 | rs2517653 | 6 | 30121185 | A | G | -0.539242 | 0.140332 | 0.000121775 | -0.539242 | 0.140332 | 0.000121775 | 1 | 0.0301354 | 0.012178737 |
| cg18267047 | 6 | TRIM10 | 30121774 | rs9261473 | 6 | 30105544 | A | C | -0.336638 | 0.0903683 | 0.000195232 | -0.336638 | 0.0903683 | 0.000195232 | 1 | 0.0777944 | 0.017671939 |
| cg08513123 | 6 | TRIM10 | 30121930 | rs2517653 | 6 | 30121185 | A | G | -0.307769 | 0.0800937 | 0.000121775 | -0.307769 | 0.0800937 | 0.000121775 | 1 | 0.0928392 | 0.012178737 |
| cg05793094 | 6 | TRIM10 | 30123034 | rs2517646 | 6 | 30122575 | C | T | 0.398257 | 0.0805354 | 7.62E-07 | 0.398257 | 0.0805354 | 7.62E-07 | 1 | 0.0814938 | 0.000183043 |
| cg17451015 | 6 | TRIM10 | 30123226 | rs2517653 | 6 | 30121185 | A | G | -0.604631 | 0.157349 | 0.000121775 | -0.604631 | 0.157349 | 0.000121775 | 1 | 0.0239393 | 0.012178737 |
| cg18420781 | 6 | TRIM10 | 30124240 | rs2517616 | 6 | 30162458 | G | C | 0.457154 | 0.110527 | 3.53E-05 | 0.457154 | 0.110527 | 3.53E-05 | 1 | 0.0497348 | 0.004431476 |
| cg25981998 | 6 | TRIM10 | 30124248 | rs2857433 | 6 | 30120633 | G | T | 0.443879 | 0.110107 | 5.55E-05 | 0.443879 | 0.110107 | 5.55E-05 | 1 | 0.0506859 | 0.006383751 |
| cg11079936 | 6 | TRIM10 | 30124299 | rs9261502 | 6 | 30111610 | T | A | 0.752622 | 0.187674 | 6.07E-05 | 0.752622 | 0.187674 | 6.07E-05 | 1 | 0.0170699 | 0.006836126 |
| cg12251145 | 6 | TRIM10 | 30124744 | rs2285796 | 6 | 30120450 | T | G | 0.333132 | 0.0827188 | 5.65E-05 | 0.333132 | 0.0827188 | 5.65E-05 | 1 | 0.0897333 | 0.006467854 |
| cg01614643 | 6 | TRIM10 | 30124769 | rs2517653 | 6 | 30121185 | A | G | 0.352644 | 0.091772 | 0.000121775 | 0.352644 | 0.091772 | 0.000121775 | 1 | 0.0706789 | 0.012178737 |
| cg00550080 | 6 | TRIM10 | 30124792 | rs2285796 | 6 | 30120450 | T | G | 0.437915 | 0.108737 | 5.65E-05 | 0.437915 | 0.108737 | 5.65E-05 | 1 | 0.051865 | 0.006467854 |
| cg03769055 | 6 | TRIM10 | 30124804 | rs1573298 | 6 | 30116160 | C | G | 0.466309 | 0.11234 | 3.31E-05 | 0.466309 | 0.11234 | 3.31E-05 | 1 | 0.0472735 | 0.00419432 |
| cg20624137 | 6 | TRIM10 | 30127365 | rs7843 | 6 | 30152367 | G | A | -0.50386 | 0.139611 | 0.000307419 | -0.50386 | 0.139611 | 0.000307419 | 1 | 0.032374 | 0.025324133 |
| cg04560098 | 6 | TRIM10 | 30127760 | rs1573296 | 6 | 30127805 | G | A | -0.383365 | 0.0987516 | 0.000103593 | -0.386766 | 0.0851927 | 5.63E-06 | 2 | 0.394684 | 0.000982065 |
| cg18678389 | 6 | TRIM15 | 30130420 | rs3129077 | 6 | 29610435 | T | C | 0.691104 | 0.147907 | 2.98E-06 | 0.691104 | 0.147907 | 2.98E-06 | 1 | 0.0218239 | 0.000588028 |
| cg27583815 | 6 | TRIM15 | 30131467 | rs9366753 | 6 | 30090336 | T | C | -0.334238 | 0.0911008 | 0.000243675 | -0.334238 | 0.0911008 | 0.000243675 | 1 | 0.0954891 | 0.021057503 |
| cg14815183 | 6 | TRIM15 | 30131613 | rs4959045 | 6 | 30155045 | A | C | -0.948285 | 0.278275 | 0.000655166 | -0.948285 | 0.278275 | 0.000655166 | 1 | 0.0143802 | 0.045448651 |
| cg21988950 | 6 | TRIM15 | 30131691 | rs1008403 | 6 | 30132827 | C | T | -0.621195 | 0.135659 | 4.67E-06 | -0.621195 | 0.135659 | 4.67E-06 | 1 | 0.0391035 | 0.000854266 |
| cg01905142 | 6 | TRIM15 | 30131840 | rs17194460 | 6 | 30131546 | G | A | -0.688555 | 0.151716 | 5.67E-06 | -0.688555 | 0.151716 | 5.67E-06 | 1 | 0.0314426 | 0.000986674 |
| cg01775921 | 6 | TRIM15 | 30138213 | rs13194768 | 6 | 30147494 | A | G | -0.376689 | 0.104371 | 0.000307301 | -0.376689 | 0.104371 | 0.000307301 | 1 | 0.058064 | 0.025324133 |
| cg27201802 | 6 | TRIM15 | 30138225 | rs4711211 | 6 | 30162809 | G | A | -0.324257 | 0.0899202 | 0.000310957 | -0.324257 | 0.0899202 | 0.000310957 | 1 | 0.0782937 | 0.025563615 |
| cg24396154 | 6 | TRIM15 | 30138762 | rs9348838 | 6 | 30189199 | T | A | 0.609006 | 0.139401 | 1.25E-05 | 0.609006 | 0.139401 | 1.25E-05 | 1 | 0.0399757 | 0.001843269 |
| cg22711111 | 6 | TRIM15 | 30139979 | rs2517616 | 6 | 30162458 | G | C | -0.495324 | 0.119756 | 3.53E-05 | -0.495324 | 0.119756 | 3.53E-05 | 1 | 0.0423526 | 0.004431476 |
| cg27142059 | 6 | TRIM15 | 30139996 | rs2517616 | 6 | 30162458 | G | C | -0.42049 | 0.101663 | 3.53E-05 | -0.445081 | 0.0931889 | 1.79E-06 | 2 | 0.0720501 | 0.00038119 |
| cg02668405 | 6 | TRIM15 | 30140372 | rs929156 | 6 | 30139699 | A | G | -0.492902 | 0.118743 | 3.31E-05 | -0.492902 | 0.118743 | 3.31E-05 | 1 | 0.0431034 | 0.00419432 |
| cg03261948 | 6 | TRIM15 | 30140417 | rs929156 | 6 | 30139699 | A | G | -0.497789 | 0.11992 | 3.31E-05 | -0.497789 | 0.11992 | 3.31E-05 | 1 | 0.0422486 | 0.00419432 |
| cg06896281 | 6 | TRIM26 | 30152617 | rs3778622 | 6 | 30165316 | A | T | -1.11031 | 0.307799 | 0.000309516 | -1.11031 | 0.307799 | 0.000309516 | 1 | 0.00652341 | 0.025483895 |
| cg02188299 | 6 | TRIM26 | 30153279 | rs9261290 | 6 | 30038647 | C | T | -0.907202 | 0.179675 | 4.45E-07 | -0.907202 | 0.179675 | 4.45E-07 | 1 | 0.0350011 | 0.000114217 |
| cg08749775 | 6 | TRIM26 | 30153760 | rs2517646 | 6 | 30122575 | C | T | 1.2588 | 0.254555 | 7.62E-07 | 1.2588 | 0.254555 | 7.62E-07 | 1 | 0.00802858 | 0.000183043 |
| cg24512216 | 6 | TRIM26 | 30157039 | rs2857458 | 6 | 30104783 | G | A | 0.927743 | 0.188288 | 8.35E-07 | 0.927743 | 0.188288 | 8.35E-07 | 1 | 0.0153865 | 0.000199112 |
| cg08395524 | 6 | TRIM26 | 30158326 | rs3094621 | 6 | 30328753 | C | T | 1.02755 | 0.292821 | 0.000449657 | 1.02755 | 0.292821 | 0.000449657 | 1 | 0.0123166 | 0.034000464 |
| cg17865068 | 6 | TRIM26 | 30158346 | rs2517609 | 6 | 30170287 | G | A | 1.00405 | 0.237736 | 2.41E-05 | 1.00405 | 0.237736 | 2.41E-05 | 1 | 0.0190959 | 0.00323445 |
| cg10636959 | 6 | TRIM26 | 30162942 | rs13194768 | 6 | 30147494 | A | G | 0.315985 | 0.0875515 | 0.000307301 | 0.315985 | 0.0875515 | 0.000307301 | 1 | 0.0825797 | 0.025324133 |
| cg03610567 | 6 | TRIM26 | 30163028 | rs3815079 | 6 | 30114365 | T | A | 0.515962 | 0.150362 | 0.00060041 | 0.515962 | 0.150362 | 0.00060041 | 1 | 0.0281114 | 0.042449463 |
| cg16102778 | 6 | TRIM26 | 30163098 | rs9261480 | 6 | 30107309 | G | A | 0.519516 | 0.138783 | 0.000181625 | 0.519516 | 0.138783 | 0.000181625 | 1 | 0.0324409 | 0.016691857 |
| cg01344914 | 6 | TRIM26 | 30163654 | rs1557608 | 6 | 30118582 | G | T | 1.33424 | 0.272608 | 9.88E-07 | 1.33424 | 0.272608 | 9.88E-07 | 1 | 0.00730825 | 0.000230709 |
| cg16709517 | 6 | TRIM26 | 30166031 | rs1633028 | 6 | 29746367 | G | T | -1.28916 | 0.290138 | 8.87E-06 | -1.28916 | 0.290138 | 8.87E-06 | 1 | 0.00606752 | 0.001422705 |
| cg24701662 | 6 | TRIM26 | 30166168 | rs2284166 | 6 | 30169475 | C | T | -0.490497 | 0.139356 | 0.000432073 | -0.490497 | 0.139356 | 0.000432073 | 1 | 0.0330141 | 0.03297849 |
| cg02541301 | 6 | TRIM26 | 30166173 | rs2284166 | 6 | 30169475 | C | T | -0.511495 | 0.145322 | 0.000432073 | -0.511495 | 0.145322 | 0.000432073 | 1 | 0.0303456 | 0.03297849 |
| cg19988490 | 6 | TRIM26 | 30167065 | rs2523721 | 6 | 30166266 | T | C | -0.544126 | 0.156671 | 0.000514672 | -0.544126 | 0.156671 | 0.000514672 | 1 | 0.0260838 | 0.037822778 |
| cg00713055 | 6 | TRIM26 | 30173575 | rs2517616 | 6 | 30162458 | G | C | -0.329745 | 0.0797235 | 3.53E-05 | -0.329745 | 0.0797235 | 3.53E-05 | 1 | 0.0957031 | 0.004431476 |
| cg26278214 | 6 | TRIM26 | 30173616 | rs9261481 | 6 | 30108111 | T | C | 1.07056 | 0.277686 | 0.000115632 | 1.07056 | 0.277686 | 0.000115632 | 1 | 0.00804659 | 0.011730808 |
| cg14741870 | 6 | TRIM26 | 30174091 | rs9391802 | 6 | 30174132 | A | G | -0.372045 | 0.0905283 | 3.96E-05 | -0.372045 | 0.0905283 | 3.96E-05 | 1 | 0.0959081 | 0.00489776 |
| cg27136023 | 6 | TRIM26 | 30174651 | rs2428503 | 6 | 30167835 | T | C | 0.898667 | 0.234289 | 0.000125242 | 0.898667 | 0.234289 | 0.000125242 | 1 | 0.0118271 | 0.012471647 |
| cg03049568 | 6 | TRIM26 | 30177166 | rs13194768 | 6 | 30147494 | A | G | 0.653042 | 0.180942 | 0.000307301 | 0.653042 | 0.180942 | 0.000307301 | 1 | 0.0191955 | 0.025324133 |
| cg00266604 | 6 | TRIM26 | 30178343 | rs13194768 | 6 | 30147494 | A | G | 0.384724 | 0.106598 | 0.000307301 | 0.409782 | 0.099295 | 3.68E-05 | 2 | 0.0667093 | 0.004587569 |
| cg02216394 | 6 | TRIM26 | 30178715 | rs9357094 | 6 | 30167476 | C | T | 0.942114 | 0.268521 | 0.000450682 | 0.942114 | 0.268521 | 0.000450682 | 1 | 0.00863175 | 0.034046194 |
| cg11556489 | 6 | TRIM26 | 30178724 | rs9357094 | 6 | 30167476 | C | T | 0.655979 | 0.186967 | 0.000450682 | 0.655979 | 0.186967 | 0.000450682 | 1 | 0.0179688 | 0.034046194 |
| cg00206463 | 6 | TRIM26 | 30179435 | rs2517616 | 6 | 30162458 | G | C | 0.265393 | 0.0641649 | 3.53E-05 | 0.271783 | 0.0599911 | 5.89E-06 | 2 | 0.188662 | 0.001019619 |
| cg23055081 | 6 | TRIM26 | 30181315 | rs2517606 | 6 | 30173545 | A | G | -0.397525 | 0.0999765 | 7.01E-05 | -0.397525 | 0.0999765 | 7.01E-05 | 1 | 0.0612148 | 0.007669356 |
| cg02210602 | 6 | TRIM26 | 30181335 | rs13194768 | 6 | 30147494 | A | G | -0.464401 | 0.128674 | 0.000307301 | -0.464401 | 0.128674 | 0.000307301 | 1 | 0.0381305 | 0.025324133 |
| cg03769629 | 6 | TRIM26 | 30181591 | rs2284166 | 6 | 30169475 | C | T | -0.636361 | 0.180798 | 0.000432073 | -0.636361 | 0.180798 | 0.000432073 | 1 | 0.0195245 | 0.03297849 |
| cg18241904 | 6 | TRIM26 | 30181604 | rs2523716 | 6 | 30170525 | T | C | -1.03338 | 0.280733 | 0.000232377 | -1.03338 | 0.280733 | 0.000232377 | 1 | 0.00806401 | 0.02034135 |
| cg08230118 | 6 | TRIM26 | 30181847 | rs9366754 | 6 | 30152033 | C | G | -0.906073 | 0.222283 | 4.58E-05 | -0.906073 | 0.222283 | 4.58E-05 | 1 | 0.015603 | 0.005463256 |
| cg15018282 | 6 | TRIM26 | 30181877 | rs28730510 | 6 | 30170057 | G | C | -0.654338 | 0.152699 | 1.83E-05 | -0.654338 | 0.152699 | 1.83E-05 | 1 | 0.0328537 | 0.002551664 |
| cg16468822 | 6 | TRIM26 | 30182349 | rs2023471 | 6 | 30076069 | A | C | 0.845768 | 0.140325 | 1.67E-09 | 0.69087 | 0.143848 | 1.57E-06 | 3 | 0.0371959 | 0.000340966 |
| cg25298725 | 6 | HLA-L | 30228047 | rs9394002 | 6 | 30304293 | A | G | 0.152283 | 0.0570468 | 0.007597863 | 0.178954 | 0.0529465 | 0.000725211 | 3 | 0.284305 | 0.04913036 |
| cg04884612 | 6 | HLA-L | 30231639 | rs3130404 | 6 | 30232250 | G | A | -0.212124 | 0.0785594 | 0.006930364 | -0.231327 | 0.060992 | 0.000149042 | 4 | 0.251781 | 0.014314163 |
| cg15572656 | 6 | TRIM39 | 30293258 | rs2523734 | 6 | 30129676 | C | A | -0.377506 | 0.109124 | 0.000541404 | -0.377506 | 0.109124 | 0.000541404 | 1 | 0.0837761 | 0.039061323 |
| cg12340546 | 6 | TRIM39 | 30296689 | rs3094677 | 6 | 30102958 | T | A | -0.821517 | 0.220331 | 0.000192639 | -0.821517 | 0.220331 | 0.000192639 | 1 | 0.0315489 | 0.017476204 |
| cg17784591 | 6 | TRIM39 | 30306659 | rs2284165 | 6 | 30160055 | G | C | -1.07894 | 0.315619 | 0.000629803 | -1.07894 | 0.315619 | 0.000629803 | 1 | 0.00731608 | 0.044004519 |
| cg27061115 | 6 | - | 30434291 | rs10080488 | 6 | 30444367 | A | C | 0.63379 | 0.157742 | 5.88E-05 | 0.63379 | 0.157742 | 5.88E-05 | 1 | 0.0189489 | 0.006698054 |
| cg10196102 | 6 | - | 30434311 | rs1034325 | 6 | 30368457 | C | T | 1.03468 | 0.233659 | 9.51E-06 | 1.03468 | 0.233659 | 9.51E-06 | 1 | 0.00837979 | 0.001494077 |
| cg22845037 | 6 | - | 30434406 | rs7761083 | 6 | 30434448 | G | A | -0.446715 | 0.111788 | 6.44E-05 | -0.42587 | 0.104416 | 4.53E-05 | 2 | 0.042275 | 0.005423618 |
| cg11012953 | 6 | - | 30434412 | rs2105960 | 6 | 30453789 | C | A | 0.485892 | 0.122005 | 6.82E-05 | 0.485892 | 0.122005 | 6.82E-05 | 1 | 0.0321163 | 0.007485461 |
| cg22829821 | 6 | - | 30434421 | rs7761083 | 6 | 30434448 | G | A | 0.192528 | 0.0481792 | 6.44E-05 | 0.32558 | 0.0812274 | 6.12E-05 | 6 | 0.431762 | 0.006880312 |
| cg15174951 | 6 | - | 30434514 | rs4711220 | 6 | 30452740 | G | A | 0.353758 | 0.0885415 | 6.46E-05 | 0.353758 | 0.0885415 | 6.46E-05 | 1 | 0.0609523 | 0.007140726 |
| cg15921779 | 6 | - | 30449081 | rs6929424 | 6 | 30441769 | G | A | -0.329589 | 0.0758387 | 1.39E-05 | -0.325547 | 0.0733425 | 9.06E-06 | 2 | 0.0863365 | 0.001434732 |
| cg25293221 | 6 | HLA-E | 30457562 | rs9266363 | 6 | 31332977 | A | G | 0.777492 | 0.0815548 | 1.55E-21 | 0.739394 | 0.216268 | 0.000628888 | 3 | 0.179313 | 0.043964376 |
| cg10457005 | 6 | HLA-E | 30457876 | rs9264663 | 6 | 31239205 | C | T | 1.61014 | 0.214801 | 6.64E-14 | 1.41233 | 0.22078 | 1.59E-10 | 1 | 0.0106878 | 1.09E-07 |
| cg11594821 | 6 | HLA-E | 30458601 | rs1264429 | 6 | 30565101 | C | T | -0.36153 | 0.161765 | 0.02542271 | -0.380055 | 0.112135 | 0.000700931 | 3 | 0.411683 | 0.0478857 |
| cg02188225 | 6 | HLA-E | 30459255 | rs2524105 | 6 | 31232910 | C | G | -0.600804 | 0.359405 | 0.09459099 | -0.760914 | 0.22542 | 0.000736828 | 2 | 0.137857 | 0.049668362 |
| cg09670485 | 6 | - | 30484066 | rs2523995 | 6 | 30102184 | T | C | 1.11239 | 0.288234 | 0.000113739 | 1.11239 | 0.288234 | 0.000113739 | 1 | 0.0149015 | 0.011553294 |
| cg23841361 | 6 | PRR3 | 30524010 | rs3132464 | 6 | 31477461 | C | T | -0.528526 | 0.107825 | 9.51E-07 | -0.474942 | 0.0999541 | 2.02E-06 | 4 | 0.145955 | 0.000425959 |
| cg25315493 | 6 | ABCF1 | 30540762 | rs55777621 | 6 | 30584133 | A | G | -0.486089 | 0.0982103 | 7.45E-07 | -0.477903 | 0.0932528 | 2.98E-07 | 2 | 0.388073 | 8.01E-05 |
| cg17762168 | 6 | MRPS18B | 30585409 | rs62392955 | 6 | 29647820 | T | A | -1.25337 | 0.315103 | 6.96E-05 | -1.25337 | 0.315103 | 6.96E-05 | 1 | 0.0174364 | 0.007627367 |
| cg00587922 | 6 | KIAA1949 | 30651601 | rs3129996 | 6 | 30651587 | A | C | -0.403458 | 0.0802644 | 5.00E-07 | -0.41015 | 0.0791297 | 2.18E-07 | 2 | 0.243685 | 6.08E-05 |
| cg26683639 | 6 | KIAA1949 | 30653755 | rs3129987 | 6 | 30766204 | T | C | -1.35241 | 0.188539 | 7.38E-13 | -1.35241 | 0.188539 | 7.38E-13 | 1 | 0.028378 | 7.21E-10 |
| cg14571710 | 6 | KIAA1949 | 30655896 | rs35118048 | 6 | 30367227 | A | C | -0.943776 | 0.200583 | 2.54E-06 | -0.943776 | 0.200583 | 2.54E-06 | 1 | 0.0191585 | 0.000520514 |
| cg11870956 | 6 | NRM | 30657000 | rs3094092 | 6 | 30657015 | T | C | 0.265377 | 0.0503152 | 1.34E-07 | 0.247781 | 0.0603192 | 4.00E-05 | 3 | 0.690876 | 0.004922986 |
| cg05546064 | 6 | MDC1 | 30685074 | rs3130040 | 6 | 30528654 | T | A | 0.679592 | 0.133399 | 3.50E-07 | 0.679592 | 0.133399 | 3.50E-07 | 1 | 0.0908969 | 9.25E-05 |
| cg00575529 | 6 | MDC1 | 30685080 | rs3129838 | 6 | 30306553 | G | A | 1.10164 | 0.261536 | 2.53E-05 | 1.10164 | 0.261536 | 2.53E-05 | 1 | 0.0168445 | 0.003376628 |
| cg07229198 | 6 | MDC1 | 30685635 | rs4713354 | 6 | 30685420 | C | A | 0.466562 | 0.134476 | 0.000521561 | 0.466562 | 0.134476 | 0.000521561 | 1 | 0.071675 | 0.038132833 |
| cg18512512 | 6 | MDC1 | 30685686 | rs4713354 | 6 | 30685420 | C | A | 0.676926 | 0.195109 | 0.000521561 | 0.676926 | 0.195109 | 0.000521561 | 1 | 0.0338684 | 0.038132833 |
| cg03151709 | 6 | MDC1 | 30686511 | rs2894043 | 6 | 30668488 | G | C | 0.435423 | 0.126352 | 0.000568828 | 0.435423 | 0.126352 | 0.000568828 | 1 | 0.0809869 | 0.040588324 |
| cg08680415 | 6 | TUBB | 30686922 | rs6909636 | 6 | 31346599 | A | G | -1.80835 | 0.378466 | 1.77E-06 | -1.80835 | 0.378466 | 1.77E-06 | 1 | 0.00330893 | 0.000378427 |
| cg15878619 | 6 | TUBB | 30687373 | rs2894043 | 6 | 30668488 | G | C | -0.493993 | 0.143348 | 0.000568828 | -0.493993 | 0.143348 | 0.000568828 | 1 | 0.0628461 | 0.040588324 |
| cg27303735 | 6 | FLOT1 | 30709605 | rs3132596 | 6 | 30783282 | G | T | -0.911669 | 0.156649 | 5.91E-09 | -0.911669 | 0.156649 | 5.91E-09 | 1 | 0.0188074 | 2.78E-06 |
| cg10916998 | 6 | FLOT1 | 30711832 | rs3094092 | 6 | 30657015 | T | C | 0.180297 | 0.0341842 | 1.34E-07 | 0.19137 | 0.0474492 | 5.51E-05 | 5 | 1.42146 | 0.006339814 |
| cg16331823 | 6 | FLOT1 | 30711835 | rs3094092 | 6 | 30657015 | T | C | 0.186409 | 0.035343 | 1.34E-07 | 0.200801 | 0.0517426 | 0.000104168 | 4 | 1.31542 | 0.010828221 |
| cg24297418 | 6 | - | 30726590 | rs9295926 | 6 | 30784700 | C | G | -1.22313 | 0.328331 | 0.000195153 | -1.22313 | 0.328331 | 0.000195153 | 1 | 0.00490606 | 0.017671939 |
| cg10008387 | 6 | - | 30796341 | rs28877339 | 6 | 30775685 | C | A | -0.24415 | 0.0522139 | 2.93E-06 | -0.268277 | 0.070258 | 0.00013434 | 5 | 0.468983 | 0.013135535 |
| cg17604312 | 6 | DDR1 | 30850829 | rs3094720 | 6 | 30843170 | A | G | 0.242044 | 0.0663919 | 0.00026675 | 0.258625 | 0.0613181 | 2.47E-05 | 4 | 0.128439 | 0.003308023 |
| cg24727290 | 6 | DDR1 | 30850868 | rs3094720 | 6 | 30843170 | A | G | 0.225039 | 0.0617276 | 0.00026675 | 0.265677 | 0.067082 | 7.48E-05 | 5 | 0.315586 | 0.008141891 |
| cg23953820 | 6 | DDR1 | 30851051 | rs3131032 | 6 | 30841631 | G | T | -0.596691 | 0.145242 | 3.99E-05 | -0.596691 | 0.145242 | 3.99E-05 | 1 | 0.0312577 | 0.004917637 |
| cg08469255 | 6 | DDR1 | 30851069 | rs3131032 | 6 | 30841631 | G | T | -0.586515 | 0.142765 | 3.99E-05 | -0.586515 | 0.142765 | 3.99E-05 | 1 | 0.032357 | 0.004917637 |
| cg14279856 | 6 | DDR1 | 30851086 | rs2894059 | 6 | 30828434 | A | G | -1.41816 | 0.309735 | 4.69E-06 | -1.41816 | 0.309735 | 4.69E-06 | 1 | 0.00711055 | 0.000854266 |
| cg12308216 | 6 | DDR1 | 30853255 | rs3130779 | 6 | 30872203 | A | G | 0.533358 | 0.127587 | 2.91E-05 | 0.578191 | 0.119731 | 1.37E-06 | 2 | 0.0552816 | 0.000305847 |
| cg25607383 | 6 | DDR1 | 30853569 | rs3130654 | 6 | 30823075 | G | C | 0.513962 | 0.147011 | 0.000472237 | 0.513962 | 0.147011 | 0.000472237 | 1 | 0.0297522 | 0.035258478 |
| cg09822812 | 6 | DDR1 | 30855729 | rs1264344 | 6 | 30800577 | T | C | 0.834867 | 0.171139 | 1.07E-06 | 0.834867 | 0.171139 | 1.07E-06 | 1 | 0.0154247 | 0.000247466 |
| cg11530564 | 6 | DDR1 | 30856121 | rs3131032 | 6 | 30841631 | G | T | 0.484269 | 0.117877 | 3.99E-05 | 0.484269 | 0.117877 | 3.99E-05 | 1 | 0.0475353 | 0.004917637 |
| cg06200824 | 6 | DDR1 | 30859855 | rs2535338 | 6 | 30804932 | T | C | 0.256248 | 0.0556122 | 4.07E-06 | 0.321626 | 0.0783236 | 4.02E-05 | 4 | 0.398385 | 0.004949287 |
| cg20335906 | 6 | DDR1 | 30859977 | rs1264344 | 6 | 30800577 | T | C | 0.630431 | 0.129232 | 1.07E-06 | 0.610889 | 0.12303 | 6.87E-07 | 2 | 0.0334891 | 0.000166977 |
| cg27593250 | 6 | DDR1 | 30859984 | rs2535338 | 6 | 30804932 | T | C | 0.329484 | 0.0715062 | 4.07E-06 | 0.260318 | 0.0686645 | 0.000149996 | 4 | 0.124823 | 0.014381541 |
| cg09474938 | 6 | GTF2H4 | 30875843 | rs2535337 | 6 | 30810084 | G | A | -0.682581 | 0.177166 | 0.000116826 | -0.682581 | 0.177166 | 0.000116826 | 1 | 0.0157349 | 0.011837165 |
| cg11403689 | 6 | GTF2H4 | 30875854 | rs2517461 | 6 | 30896399 | C | T | -0.256651 | 0.0687353 | 0.000188592 | -0.256651 | 0.0687353 | 0.000188592 | 1 | 0.105432 | 0.017234508 |
| cg23142900 | 6 | GTF2H4 | 30875883 | rs9262294 | 6 | 30887207 | T | C | 0.310751 | 0.0838479 | 0.000210515 | 0.310751 | 0.0838479 | 0.000210515 | 1 | 0.0706449 | 0.018855246 |
| cg19809077 | 6 | GTF2H4 | 30875892 | rs1264342 | 6 | 30802017 | A | C | 1.37836 | 0.358504 | 0.00012072 | 1.37836 | 0.358504 | 0.00012072 | 1 | 0.00380793 | 0.01213054 |
| cg00526088 | 6 | VARS2 | 30882194 | rs1264306 | 6 | 30882203 | T | C | 0.643059 | 0.183028 | 0.00044243 | 0.643059 | 0.183028 | 0.00044243 | 1 | 0.0138258 | 0.03353223 |
| cg19331040 | 6 | VARS2 | 30882208 | rs1264306 | 6 | 30882203 | T | C | 0.199765 | 0.0568573 | 0.00044243 | 0.185401 | 0.0529562 | 0.000463567 | 4 | 0.177287 | 0.034857163 |
| cg27525647 | 6 | VARS2 | 30882358 | rs9262291 | 6 | 30886015 | G | T | -0.473704 | 0.127817 | 0.000210515 | -0.473704 | 0.127817 | 0.000210515 | 1 | 0.0303276 | 0.018855246 |
| cg27185298 | 6 | VARS2 | 30885205 | rs2252760 | 6 | 30892377 | C | G | -0.472354 | 0.13016 | 0.000284571 | -0.472354 | 0.13016 | 0.000284571 | 1 | 0.0294361 | 0.023792547 |
| cg21394121 | 6 | VARS2 | 30885709 | rs1264306 | 6 | 30882203 | T | C | 0.684168 | 0.194729 | 0.00044243 | 0.663818 | 0.159659 | 3.22E-05 | 2 | 0.0197191 | 0.004095768 |
| cg07269567 | 6 | VARS2 | 30886161 | rs2517582 | 6 | 30808762 | T | C | 1.31418 | 0.307939 | 1.98E-05 | 1.31418 | 0.307939 | 1.98E-05 | 1 | 0.00495169 | 0.002717845 |
| cg20584679 | 6 | VARS2 | 30888173 | rs2252760 | 6 | 30892377 | C | G | 0.207531 | 0.0571866 | 0.000284571 | 0.210566 | 0.0519517 | 5.06E-05 | 3 | 0.196436 | 0.005897405 |
| cg10006979 | 6 | SFTA2 | 30900678 | rs1264306 | 6 | 30882203 | T | C | -0.359815 | 0.102411 | 0.00044243 | -0.359815 | 0.102411 | 0.00044243 | 1 | 0.0444048 | 0.03353223 |
| cg10033746 | 6 | DPCR1 | 30920769 | rs2532921 | 6 | 30922570 | G | C | 0.524178 | 0.137989 | 0.000145518 | 0.524178 | 0.137989 | 0.000145518 | 1 | 0.0259178 | 0.014025511 |
| cg02872545 | 6 | - | 30923697 | rs2532920 | 6 | 30923629 | T | C | -0.755231 | 0.203572 | 0.000207398 | -0.755231 | 0.203572 | 0.000207398 | 1 | 0.0119041 | 0.018668911 |
| cg16470319 | 6 | - | 30923724 | rs9262291 | 6 | 30886015 | G | T | -1.11393 | 0.300564 | 0.000210515 | -1.11393 | 0.300564 | 0.000210515 | 1 | 0.00538259 | 0.018855246 |
| cg14531049 | 6 | MUC21 | 30952175 | rs3131932 | 6 | 30940328 | A | G | -1.35 | 0.366922 | 0.000233983 | -1.35 | 0.366922 | 0.000233983 | 1 | 0.00349193 | 0.020437844 |
| cg24008474 | 6 | - | 30961749 | rs6910115 | 6 | 30985504 | T | C | 0.304889 | 0.0882584 | 0.000551395 | 0.28543 | 0.0831459 | 0.000597311 | 2 | 0.156516 | 0.042267263 |
| cg26190386 | 6 | - | 30994978 | rs12175179 | 6 | 31040264 | T | C | 1.91922 | 0.171905 | 6.25E-29 | 1.28186 | 0.193886 | 3.83E-11 | 1 | 0.0228367 | 3.21E-08 |
| cg20984924 | 6 | - | 31005837 | rs2844683 | 6 | 31003436 | C | A | -0.857777 | 0.149128 | 8.85E-09 | -0.857777 | 0.149128 | 8.85E-09 | 1 | 0.0221257 | 4.02E-06 |
| cg03529043 | 6 | HCG22 | 31021134 | rs7745521 | 6 | 31027510 | G | A | -0.993338 | 0.105076 | 3.33E-21 | -0.993338 | 0.105076 | 3.33E-21 | 1 | 0.053667 | 1.13E-17 |
| cg03665259 | 6 | HCG22 | 31021826 | rs2523856 | 6 | 31021630 | C | T | -0.976922 | 0.138768 | 1.94E-12 | -0.976922 | 0.138768 | 1.94E-12 | 1 | 0.0258779 | 1.78E-09 |
| cg18735641 | 6 | HCG22 | 31022278 | rs2523853 | 6 | 31022557 | A | G | -0.294589 | 0.0842754 | 0.000473181 | -0.276178 | 0.0753125 | 0.000245392 | 3 | 0.196525 | 0.021155907 |
| cg12496807 | 6 | HCG22 | 31023763 | rs2517520 | 6 | 31027703 | A | C | -0.86242 | 0.0943097 | 6.08E-20 | -0.86242 | 0.0943097 | 6.08E-20 | 1 | 0.0528491 | 1.86E-16 |
| cg23878318 | 6 | HCG22 | 31023770 | rs9263465 | 6 | 31048619 | A | G | -0.588639 | 0.0621718 | 2.90E-21 | -0.606079 | 0.0626831 | 4.16E-22 | 2 | 0.132277 | 1.53E-18 |
| cg14343414 | 6 | HCG22 | 31025967 | rs2233960 | 6 | 31081052 | G | A | 0.375998 | 0.0433835 | 4.50E-18 | 0.411141 | 0.0806719 | 3.47E-07 | 7 | 0.961208 | 9.18E-05 |
| cg08448622 | 6 | HCG22 | 31026105 | rs9262670 | 6 | 31034990 | T | C | -0.813358 | 0.104127 | 5.72E-15 | -0.813358 | 0.104127 | 5.72E-15 | 1 | 0.0539717 | 8.20E-12 |
| cg26756125 | 6 | PSORS1C1 | 31090270 | rs2517469 | 6 | 31057972 | T | C | -1.80062 | 0.229641 | 4.51E-15 | -1.44457 | 0.238195 | 1.33E-09 | 1 | 0.00869286 | 7.13E-07 |
| cg01287833 | 6 | CCHCR1 | 31113026 | rs3094227 | 6 | 31117378 | A | C | -0.808908 | 0.101094 | 1.24E-15 | -0.808908 | 0.101094 | 1.24E-15 | 1 | 0.0719958 | 2.26E-12 |
| cg01086672 | 6 | CCHCR1 | 31123044 | rs2073719 | 6 | 31112925 | C | T | 1.41592 | 0.174521 | 4.98E-16 | 1.40476 | 0.191661 | 2.33E-13 | 1 | 0.0165872 | 2.55E-10 |
| cg26738916 | 6 | CCHCR1 | 31126003 | rs142242725 | 6 | 31135878 | A | G | 1.45973 | 0.156469 | 1.08E-20 | 1.36283 | 0.178495 | 2.28E-14 | 1 | 0.0364045 | 2.95E-11 |
| cg00160818 | 6 | CCHCR1 | 31126356 | rs1573296 | 6 | 30127805 | G | A | -1.02343 | 0.263627 | 0.000103593 | -1.02343 | 0.263627 | 0.000103593 | 1 | 0.0154975 | 0.010786216 |
| cg01190171 | 6 | CCHCR1 | 31126373 | rs130072 | 6 | 31112484 | T | C | -0.259466 | 0.0277815 | 9.84E-21 | -0.275357 | 0.0630575 | 1.26E-05 | 4 | 1.89017 | 0.001854907 |
| cg18795955 | 6 | CCHCR1 | 31126736 | rs9263787 | 6 | 31128244 | T | A | 0.817073 | 0.150831 | 6.07E-08 | 0.817073 | 0.150831 | 6.07E-08 | 1 | 0.0207036 | 2.03E-05 |
| cg14869527 | 6 | CCHCR1 | 31126823 | rs3094193 | 6 | 31137774 | G | T | 0.673906 | 0.125093 | 7.17E-08 | 0.673906 | 0.125093 | 7.17E-08 | 1 | 0.0301109 | 2.35E-05 |
| cg02909694 | 6 | CCHCR1 | 31126832 | rs3094193 | 6 | 31137774 | G | T | 0.855365 | 0.158777 | 7.17E-08 | 0.855365 | 0.158777 | 7.17E-08 | 1 | 0.0186534 | 2.35E-05 |
| cg24075966 | 6 | CCHCR1 | 31126838 | rs3094193 | 6 | 31137774 | G | T | 0.827923 | 0.153683 | 7.17E-08 | 0.827923 | 0.153683 | 7.17E-08 | 1 | 0.0199169 | 2.35E-05 |
| cg13979602 | 6 | CCHCR1 | 31127004 | rs130072 | 6 | 31112484 | T | C | 0.419195 | 0.044884 | 9.84E-21 | 0.398503 | 0.0976361 | 4.48E-05 | 3 | 0.721161 | 0.00536796 |
| cg16095155 | 6 | TCF19 | 31127863 | rs1108746 | 6 | 31139504 | A | C | 0.973748 | 0.135519 | 6.75E-13 | 0.914998 | 0.172289 | 1.09E-07 | 2 | 0.0621006 | 3.34E-05 |
| cg18050521 | 6 | TCF19 | 31130548 | rs3130498 | 6 | 31117619 | T | C | 1.00061 | 0.123972 | 7.03E-16 | 1.00061 | 0.123972 | 7.03E-16 | 1 | 0.0423281 | 1.41E-12 |
| cg15948871 | 6 | POU5F1 | 31139620 | rs2239524 | 6 | 31125569 | T | G | 0.607312 | 0.111693 | 5.42E-08 | 0.810406 | 0.201584 | 5.82E-05 | 3 | 0.0574384 | 0.006642027 |
| cg18285280 | 6 | PSORS1C3 | 31141797 | rs6457327 | 6 | 31074030 | A | C | 1.95082 | 0.261049 | 7.90E-14 | 1.41336 | 0.267428 | 1.26E-07 | 1 | 0.00627131 | 3.77E-05 |
| cg07907517 | 6 | PSORS1C3 | 31145541 | rs1265078 | 6 | 31112602 | C | G | 0.530374 | 0.149887 | 0.00040252 | 0.530374 | 0.149887 | 0.00040252 | 1 | 0.0224492 | 0.031387879 |
| cg16055410 | 6 | PSORS1C3 | 31146124 | rs2394897 | 6 | 31213502 | A | G | -0.599677 | 0.089341 | 1.93E-11 | -0.606392 | 0.076403 | 2.10E-15 | 3 | 0.125814 | 3.58E-12 |
| cg11524593 | 6 | HCG27 | 31165416 | rs28362342 | 6 | 31165438 | G | T | 0.542156 | 0.111565 | 1.18E-06 | 0.542156 | 0.111565 | 1.18E-06 | 1 | 0.0396595 | 0.00026789 |
| cg08588744 | 6 | HCG27 | 31165492 | rs9263871 | 6 | 31170528 | G | A | -0.566469 | 0.119387 | 2.09E-06 | -0.566469 | 0.119387 | 2.09E-06 | 1 | 0.0342588 | 0.000438245 |
| cg27032957 | 6 | HCG27 | 31165819 | rs9263871 | 6 | 31170528 | G | A | 1.05342 | 0.222015 | 2.09E-06 | 1.05342 | 0.222015 | 2.09E-06 | 1 | 0.00983386 | 0.000438245 |
| cg02773045 | 6 | HCG27 | 31168568 | rs4713447 | 6 | 31162963 | G | A | 0.997987 | 0.168633 | 3.27E-09 | 0.997987 | 0.168633 | 3.27E-09 | 1 | 0.0161386 | 1.59E-06 |
| cg02936944 | 6 | HCG27 | 31168943 | rs28362351 | 6 | 31167760 | T | C | -1.00773 | 0.12578 | 1.14E-15 | -0.981808 | 0.121394 | 6.14E-16 | 2 | 0.0726816 | 1.26E-12 |
| cg14972843 | 6 | HLA-C | 31239402 | rs9266207 | 6 | 31324953 | C | T | 0.69444 | 0.0870631 | 1.52E-15 | 0.702058 | 0.0757263 | 1.87E-20 | 3 | 0.0967895 | 6.08E-17 |
| cg01006124 | 6 | HLA-C | 31239767 | rs9264640 | 6 | 31238372 | C | G | 0.688979 | 0.0916541 | 5.64E-14 | 0.638742 | 0.105521 | 1.42E-09 | 3 | 0.34184 | 7.57E-07 |
| cg18785300 | 6 | HLA-C | 31240047 | rs2844612 | 6 | 31243971 | A | G | 0.365003 | 0.0516768 | 1.64E-12 | 0.2343 | 0.0645124 | 0.000281453 | 4 | 0.980311 | 0.023641589 |
| cg08309069 | 6 | HLA-C | 31240651 | rs6928399 | 6 | 31195218 | T | C | -0.225987 | 0.03046 | 1.19E-13 | -0.271653 | 0.0631886 | 1.72E-05 | 11 | 2.46193 | 0.002419503 |
| cg05030953 | 6 | HLA-C | 31241000 | rs6928399 | 6 | 31195218 | T | C | -0.188231 | 0.0253709 | 1.19E-13 | -0.215175 | 0.0634754 | 0.000699298 | 13 | 2.59314 | 0.047794292 |
| cg23366493 | 6 | - | 31276669 | rs3873387 | 6 | 31275663 | A | C | 0.316918 | 0.0609782 | 2.03E-07 | 0.468535 | 0.13259 | 0.000409836 | 5 | 0.275093 | 0.031866378 |
| cg03990811 | 6 | MICA | 31371318 | rs2534659 | 6 | 31472149 | G | A | 0.48366 | 0.107693 | 7.09E-06 | 0.483905 | 0.135436 | 0.000353085 | 3 | 0.0725377 | 0.028379324 |
| cg26990733 | 6 | MICA | 31371465 | rs2596503 | 6 | 31320810 | A | G | -0.725202 | 0.141203 | 2.81E-07 | -0.725202 | 0.141203 | 2.81E-07 | 1 | 0.0383323 | 7.58E-05 |
| cg13829635 | 6 | MICA | 31371573 | rs3873393 | 6 | 31334265 | C | T | -0.922412 | 0.168029 | 4.04E-08 | -1.09889 | 0.193532 | 1.37E-08 | 2 | 0.0572804 | 5.61E-06 |
| cg19092529 | 6 | MICA | 31380541 | rs6934187 | 6 | 31380974 | G | C | 1.10428 | 0.325463 | 0.000691538 | 1.10428 | 0.325463 | 0.000691538 | 1 | 0.00515676 | 0.047383777 |
| cg18062706 | 6 | - | 31409467 | rs36223710 | 6 | 31369888 | T | G | 0.196284 | 0.0410747 | 1.77E-06 | 0.22166 | 0.0453575 | 1.03E-06 | 5 | 4.11998 | 0.000237179 |
| cg01172310 | 6 | - | 31409505 | rs151036504 | 6 | 31409578 | T | C | 0.207014 | 0.0419337 | 7.96E-07 | 0.218506 | 0.0405117 | 6.92E-08 | 3 | 3.6008 | 2.28E-05 |
| cg19258508 | 6 | - | 31409543 | rs36223710 | 6 | 31369888 | T | G | 0.206041 | 0.0431164 | 1.77E-06 | 0.2291 | 0.0545972 | 2.72E-05 | 6 | 3.7864 | 0.003570754 |
| cg23354933 | 6 | - | 31409572 | rs36223710 | 6 | 31369888 | T | G | 0.20513 | 0.042926 | 1.77E-06 | 0.216905 | 0.0396455 | 4.48E-08 | 7 | 3.72286 | 1.58E-05 |
| cg18892128 | 6 | - | 31409575 | rs2844512 | 6 | 31409566 | C | G | -0.0224741 | 0.0361238 | 0.5338492 | 0.18054 | 0.0483388 | 0.000187852 | 10 | 4.70152 | 0.017176493 |
| cg22809408 | 6 | - | 31409700 | rs151036504 | 6 | 31409578 | T | C | 0.201207 | 0.0407573 | 7.96E-07 | 0.220832 | 0.0518708 | 2.07E-05 | 4 | 3.90809 | 0.002824872 |
| cg08099293 | 6 | HCP5 | 31430860 | rs2516398 | 6 | 31481526 | G | T | -2.79754 | 0.35241 | 2.07E-15 | -1.68816 | 0.35475 | 1.95E-06 | 1 | 0.00347342 | 0.000413345 |
| cg13090671 | 6 | HCP5 | 31431002 | rs2524092 | 6 | 31240216 | A | C | -0.948362 | 0.125713 | 4.60E-14 | -0.948362 | 0.125713 | 4.60E-14 | 1 | 0.0326754 | 5.74E-11 |
| cg08859411 | 6 | HCG26 | 31438205 | rs9267136 | 6 | 31438152 | A | G | 0.985798 | 0.149168 | 3.90E-11 | 0.985798 | 0.149168 | 3.90E-11 | 1 | 0.0843094 | 3.26E-08 |
| cg07078789 | 6 | MICB | 31465720 | rs3828903 | 6 | 31464739 | A | G | 0.374566 | 0.128243 | 0.003491922 | 0.406519 | 0.11626 | 0.000471236 | 2 | 0.0382943 | 0.035221432 |
| cg23660197 | 6 | MICB | 31477952 | rs28732141 | 6 | 31519365 | T | C | -0.752415 | 0.184414 | 4.51E-05 | -0.747336 | 0.163655 | 4.96E-06 | 2 | 0.107978 | 0.000894113 |
| cg06434490 | 6 | - | 31494261 | rs3020582 | 6 | 31351522 | A | C | -1.2278 | 0.172648 | 1.15E-12 | -1.2278 | 0.172648 | 1.15E-12 | 1 | 0.0176607 | 1.09E-09 |
| cg17439097 | 6 | BAT1 | 31502915 | rs3115537 | 6 | 31497835 | G | C | 0.471783 | 0.0685034 | 5.73E-12 | 0.471783 | 0.0685034 | 5.73E-12 | 1 | 0.169901 | 5.08E-09 |
| cg15647614 | 6 | BAT1 | 31507433 | rs3134893 | 6 | 31476514 | C | A | -1.01769 | 0.163278 | 4.60E-10 | -1.01769 | 0.163278 | 4.60E-10 | 1 | 0.0229447 | 2.76E-07 |
| cg16981259 | 6 | BAT1 | 31509434 | rs2516390 | 6 | 31529883 | C | T | 1.54286 | 0.208399 | 1.34E-13 | 0.837613 | 0.221683 | 0.000157878 | 1 | 0.0120947 | 0.014889319 |
| cg04431990 | 6 | BAT1 | 31509496 | rs2523507 | 6 | 31509355 | G | A | 0.747825 | 0.198011 | 0.000158985 | 0.747825 | 0.198011 | 0.000158985 | 1 | 0.015175 | 0.014967589 |
| cg26764200 | 6 | SNORD84 | 31510407 | rs933208 | 6 | 31506648 | G | T | 1.72192 | 0.431199 | 6.52E-05 | 1.72192 | 0.431199 | 6.52E-05 | 1 | 0.00313269 | 0.007193163 |
| cg10218472 | 6 | NFKBIL1 | 31513867 | rs2071593 | 6 | 31512799 | A | G | -0.716751 | 0.19821 | 0.00029912 | -0.716751 | 0.19821 | 0.00029912 | 1 | 0.0434899 | 0.024753685 |
| cg15649774 | 6 | NFKBIL1 | 31515286 | rs3219184 | 6 | 31515140 | G | A | -0.556962 | 0.157763 | 0.000415051 | -0.556962 | 0.157763 | 0.000415051 | 1 | 0.0700742 | 0.032101046 |
| cg02030913 | 6 | NFKBIL1 | 31515391 | rs9380261 | 6 | 31505784 | C | G | 1.08124 | 0.282062 | 0.000126465 | 1.08124 | 0.282062 | 0.000126465 | 1 | 0.0102661 | 0.012562558 |
| cg10271061 | 6 | ATP6V1G2 | 31516015 | rs3093542 | 6 | 31540693 | C | G | 1.12816 | 0.221368 | 3.47E-07 | 1.12816 | 0.221368 | 3.47E-07 | 1 | 0.079125 | 9.18E-05 |
| cg22369037 | 6 | ATP6V1G2 | 31516024 | rs116282626 | 6 | 31515619 | A | G | 0.947446 | 0.18917 | 5.50E-07 | 0.931291 | 0.175096 | 1.05E-07 | 2 | 0.112128 | 3.23E-05 |
| cg21587837 | 6 | NFKBIL1 | 31525894 | rs3130062 | 6 | 31525912 | C | T | -0.313498 | 0.0396862 | 2.83E-15 | -0.303768 | 0.0552676 | 3.89E-08 | 4 | 1.49114 | 1.39E-05 |
| cg09037630 | 6 | - | 31528239 | rs2857602 | 6 | 31533378 | G | A | -1.86005 | 0.251665 | 1.47E-13 | -1.36727 | 0.326789 | 2.87E-05 | 2 | 0.00785325 | 0.003741808 |
| cg06632549 | 6 | - | 31529993 | rs138240887 | 6 | 31530873 | A | G | -0.409338 | 0.0560482 | 2.83E-13 | -0.413428 | 0.0544006 | 2.99E-14 | 2 | 1.39637 | 3.85E-11 |
| cg20330447 | 6 | LTA | 31539539 | rs2251824 | 6 | 31511857 | A | G | 0.800355 | 0.170859 | 2.81E-06 | 0.800355 | 0.170859 | 2.81E-06 | 1 | 0.0269528 | 0.000559391 |
| cg10995925 | 6 | LTA | 31539601 | rs2229094 | 6 | 31540556 | C | T | 0.525959 | 0.0942108 | 2.37E-08 | 0.706929 | 0.186559 | 0.000151118 | 3 | 0.0904309 | 0.014453548 |
| cg14441276 | 6 | LTA | 31539735 | rs2229094 | 6 | 31540556 | C | T | 0.544614 | 0.0975523 | 2.37E-08 | 0.467826 | 0.1101 | 2.15E-05 | 2 | 0.100946 | 0.002918372 |
| cg16280132 | 6 | LTA | 31540459 | rs2844484 | 6 | 31536224 | A | G | 0.278481 | 0.0375482 | 1.21E-13 | 0.337555 | 0.0957591 | 0.000423502 | 5 | 0.403482 | 0.03249262 |
| cg03599224 | 6 | LTA | 31541349 | rs1121800 | 6 | 31535074 | A | T | 0.618793 | 0.0833642 | 1.16E-13 | 0.641812 | 0.0788467 | 4.00E-16 | 3 | 0.0775426 | 8.64E-13 |
| cg21370522 | 6 | TNF | 31543219 | rs3093991 | 6 | 31491467 | C | A | 0.99911 | 0.140847 | 1.32E-12 | 0.874418 | 0.163016 | 8.16E-08 | 2 | 0.0501692 | 2.60E-05 |
| cg01569083 | 6 | TNF | 31543289 | rs3093991 | 6 | 31491467 | C | A | 1.00507 | 0.141687 | 1.32E-12 | 1.09728 | 0.181845 | 1.60E-09 | 2 | 0.0392822 | 8.39E-07 |
| cg12681001 | 6 | TNF | 31543540 | rs2844484 | 6 | 31536224 | A | G | 0.7602 | 0.102499 | 1.21E-13 | 0.794922 | 0.109232 | 3.43E-13 | 4 | 0.283175 | 3.66E-10 |
| cg21222743 | 6 | TNF | 31543545 | rs2844484 | 6 | 31536224 | A | G | 0.683055 | 0.0920976 | 1.21E-13 | 0.625049 | 0.0942934 | 3.40E-11 | 6 | 0.855919 | 2.87E-08 |
| cg10717214 | 6 | TNF | 31543557 | rs1121800 | 6 | 31535074 | A | T | 0.660433 | 0.088974 | 1.16E-13 | 0.875158 | 0.0974123 | 2.65E-19 | 6 | 0.285614 | 7.80E-16 |
| cg04425624 | 6 | TNF | 31543565 | rs2844484 | 6 | 31536224 | A | G | 0.744957 | 0.100444 | 1.21E-13 | 0.688985 | 0.099143 | 3.69E-12 | 4 | 0.680715 | 3.32E-09 |
| cg10650821 | 6 | TNF | 31543686 | rs1121800 | 6 | 31535074 | A | T | 0.74994 | 0.101032 | 1.16E-13 | 0.950163 | 0.157985 | 1.81E-09 | 2 | 0.174533 | 9.42E-07 |
| cg09637172 | 6 | TNF | 31545252 | rs2844484 | 6 | 31536224 | A | G | 0.918831 | 0.123888 | 1.21E-13 | 0.918831 | 0.123888 | 1.21E-13 | 1 | 0.0313065 | 1.41E-10 |
| cg05952498 | 6 | TNF | 31545257 | rs2844484 | 6 | 31536224 | A | G | 1.10331 | 0.148761 | 1.21E-13 | 1.10331 | 0.148761 | 1.21E-13 | 1 | 0.021684 | 1.41E-10 |
| cg15989608 | 6 | TNF | 31545321 | rs2844484 | 6 | 31536224 | A | G | 0.751876 | 0.101377 | 1.21E-13 | 0.751876 | 0.101377 | 1.21E-13 | 1 | 0.0468068 | 1.41E-10 |
| cg26736341 | 6 | TNF | 31545342 | rs2844484 | 6 | 31536224 | A | G | 0.730745 | 0.0985277 | 1.21E-13 | 0.730745 | 0.0985277 | 1.21E-13 | 1 | 0.049558 | 1.41E-10 |
| cg04472685 | 6 | TNF | 31545473 | rs3135042 | 6 | 31532254 | G | A | 0.756892 | 0.102199 | 1.31E-13 | 0.756892 | 0.102199 | 1.31E-13 | 1 | 0.0460427 | 1.51E-10 |
| cg02137984 | 6 | TNF | 31545898 | rs2844484 | 6 | 31536224 | A | G | 0.697227 | 0.0940084 | 1.21E-13 | 0.697227 | 0.0940084 | 1.21E-13 | 1 | 0.054446 | 1.41E-10 |
| cg06825478 | 6 | TNF | 31546067 | rs2857710 | 6 | 31532553 | C | T | 0.998314 | 0.134755 | 1.29E-13 | 0.998314 | 0.134755 | 1.29E-13 | 1 | 0.0264462 | 1.49E-10 |
| cg17755321 | 6 | TNF | 31546085 | rs1121800 | 6 | 31535074 | A | T | 0.972928 | 0.131074 | 1.16E-13 | 0.972928 | 0.131074 | 1.16E-13 | 1 | 0.0279617 | 1.41E-10 |
| cg02581828 | 6 | - | 31546769 | rs2516391 | 6 | 31529335 | T | G | 1.87315 | 0.253013 | 1.34E-13 | 1.72358 | 0.393711 | 1.20E-05 | 1 | 0.00299695 | 0.001792766 |
| cg24540603 | 6 | - | 31547917 | rs2523500 | 6 | 31518354 | G | A | 0.986188 | 0.129068 | 2.18E-14 | 0.986188 | 0.129068 | 2.18E-14 | 1 | 0.0303925 | 2.85E-11 |
| cg23204396 | 6 | - | 31548107 | rs2523500 | 6 | 31518354 | G | A | 0.5579 | 0.0730156 | 2.18E-14 | 0.435327 | 0.0906399 | 1.57E-06 | 5 | 0.220258 | 0.000340966 |
| cg26311932 | 6 | LTB | 31549563 | rs2523500 | 6 | 31518354 | G | A | 1.12411 | 0.14712 | 2.18E-14 | 1.12411 | 0.14712 | 2.18E-14 | 1 | 0.0233799 | 2.85E-11 |
| cg26724726 | 6 | LTB | 31549853 | rs2844484 | 6 | 31536224 | A | G | 0.883792 | 0.119163 | 1.21E-13 | 0.828082 | 0.109627 | 4.27E-14 | 2 | 0.0608163 | 5.36E-11 |
| cg06526741 | 6 | LTB | 31549929 | rs2857602 | 6 | 31533378 | G | A | 1.20257 | 0.162709 | 1.47E-13 | 1.20257 | 0.162709 | 1.47E-13 | 1 | 0.0181162 | 1.67E-10 |
| cg19279042 | 6 | LTB | 31550090 | rs2256965 | 6 | 31555130 | A | G | 0.643077 | 0.164086 | 8.89E-05 | 0.643077 | 0.164086 | 8.89E-05 | 1 | 0.0169456 | 0.009419692 |
| cg02249390 | 6 | LTB | 31550612 | rs2844484 | 6 | 31536224 | A | G | 1.16151 | 0.156608 | 1.21E-13 | 1.16151 | 0.156608 | 1.21E-13 | 1 | 0.0195561 | 1.41E-10 |
| cg06887580 | 6 | LTB | 31550699 | rs2516479 | 6 | 31528326 | G | C | 1.02429 | 0.139332 | 1.98E-13 | 1.4149 | 0.290448 | 1.11E-06 | 2 | 0.0686239 | 0.000255112 |
| cg16795830 | 6 | LST1 | 31554199 | rs148280868 | 6 | 31362214 | A | G | 0.793262 | 0.16342 | 1.21E-06 | 0.798323 | 0.15109 | 1.27E-07 | 2 | 0.238705 | 3.78E-05 |
| cg09531959 | 6 | LST1 | 31554558 | rs2523500 | 6 | 31518354 | G | A | 2.00589 | 0.262522 | 2.18E-14 | 1.1152 | 0.284551 | 8.89E-05 | 1 | 0.00557719 | 0.009419692 |
| cg15343510 | 6 | AIF1 | 31582285 | rs9267551 | 6 | 31697957 | C | G | 0.309835 | 0.0264113 | 9.08E-32 | 0.32343 | 0.0738666 | 1.20E-05 | 9 | 2.93352 | 0.001789644 |
| cg14694191 | 6 | AIF1 | 31582340 | rs45593732 | 6 | 31583725 | T | C | 0.416834 | 0.0598864 | 3.41E-12 | 0.419085 | 0.0563733 | 1.06E-13 | 2 | 1.2881 | 1.30E-10 |
| cg01674119 | 6 | AIF1 | 31583231 | rs45593732 | 6 | 31583725 | T | C | 1.53987 | 0.221233 | 3.41E-12 | 1.42978 | 0.229685 | 4.84E-10 | 1 | 0.0985061 | 2.89E-07 |
| cg21440587 | 6 | AIF1 | 31583458 | rs45593732 | 6 | 31583725 | T | C | 0.42052 | 0.0604158 | 3.41E-12 | 0.425915 | 0.0670364 | 2.11E-10 | 3 | 1.26401 | 1.41E-07 |
| cg17478749 | 6 | SNORA38 | 31589365 | rs2763981 | 6 | 31840021 | T | A | 1.35414 | 0.134191 | 6.17E-24 | 1.00655 | 0.100734 | 1.68E-23 | 3 | 0.0914313 | 9.40E-20 |
| cg02054431 | 6 | SNORA38 | 31589593 | rs77874906 | 6 | 32054884 | C | G | 1.12229 | 0.225038 | 6.14E-07 | 1.12229 | 0.225038 | 6.14E-07 | 1 | 0.0378436 | 0.000152418 |
| cg16932560 | 6 | SNORA38 | 31589994 | rs45593732 | 6 | 31583725 | T | C | 1.28282 | 0.184302 | 3.41E-12 | 1.24252 | 0.178325 | 3.24E-12 | 2 | 0.140708 | 2.94E-09 |
| cg11643442 | 6 | SNORA38 | 31590513 | rs45593732 | 6 | 31583725 | T | C | 1.05995 | 0.152282 | 3.41E-12 | 1.05052 | 0.143106 | 2.14E-13 | 2 | 0.199603 | 2.36E-10 |
| cg16291917 | 6 | SNORA38 | 31590576 | rs204991 | 6 | 32161366 | C | T | 0.897644 | 0.242503 | 0.000214321 | 0.897644 | 0.242503 | 0.000214321 | 1 | 0.0120794 | 0.019059303 |
| cg25626453 | 6 | BAT2 | 31599526 | rs56229298 | 6 | 31751517 | A | C | 0.565752 | 0.102362 | 3.27E-08 | 0.565752 | 0.102362 | 3.27E-08 | 1 | 0.903819 | 1.19E-05 |
| cg11154666 | 6 | BAT2 | 31599532 | rs56229298 | 6 | 31751517 | A | C | 0.496765 | 0.0898805 | 3.27E-08 | 0.496765 | 0.0898805 | 3.27E-08 | 1 | 1.17415 | 1.19E-05 |
| cg03691635 | 6 | BAT2 | 31599537 | rs139010734 | 6 | 31974014 | T | C | 0.515184 | 0.103757 | 6.87E-07 | 0.515184 | 0.103757 | 6.87E-07 | 1 | 0.929524 | 0.000166977 |
| cg15685889 | 6 | BAT2 | 31599613 | rs56229298 | 6 | 31751517 | A | C | 0.430384 | 0.0778702 | 3.27E-08 | 0.430384 | 0.0778702 | 3.27E-08 | 1 | 1.56624 | 1.19E-05 |
| cg22954787 | 6 | BAT2 | 31599631 | rs56229298 | 6 | 31751517 | A | C | 0.650449 | 0.117687 | 3.27E-08 | 0.650449 | 0.117687 | 3.27E-08 | 1 | 0.682217 | 1.19E-05 |
| cg00180097 | 6 | BAT2 | 31601157 | rs805257 | 6 | 31634193 | G | A | -0.705134 | 0.0755993 | 1.10E-20 | -0.707032 | 0.0732778 | 5.07E-22 | 2 | 0.087704 | 1.79E-18 |
| cg11234172 | 6 | BAT2 | 31601179 | rs805257 | 6 | 31634193 | G | A | 1.35097 | 0.144841 | 1.10E-20 | 1.13929 | 0.185288 | 7.84E-10 | 1 | 0.0139337 | 4.37E-07 |
| cg07827717 | 6 | BAT2 | 31602599 | rs805257 | 6 | 31634193 | G | A | -1.63491 | 0.175283 | 1.10E-20 | -1.38089 | 0.219849 | 3.38E-10 | 1 | 0.0101859 | 2.12E-07 |
| cg16793622 | 6 | BAT2 | 31602975 | rs2844465 | 6 | 31601022 | C | T | -1.74558 | 0.191288 | 7.26E-20 | -1.4068 | 0.227146 | 5.91E-10 | 1 | 0.00929508 | 3.40E-07 |
| cg17006042 | 6 | BAT3 | 31620002 | rs805303 | 6 | 31616366 | A | G | 0.633931 | 0.0697207 | 9.83E-20 | 0.786958 | 0.167997 | 2.81E-06 | 4 | 0.126412 | 0.000559391 |
| cg08885659 | 6 | BAT3 | 31620042 | rs707939 | 6 | 31726688 | A | C | 1.10541 | 0.256636 | 1.65E-05 | 1.10541 | 0.256636 | 1.65E-05 | 1 | 0.00736599 | 0.002347782 |
| cg11075148 | 6 | APOM | 31625404 | rs805269 | 6 | 31644282 | G | A | 0.543289 | 0.137595 | 7.87E-05 | 0.543289 | 0.137595 | 7.87E-05 | 1 | 0.167054 | 0.008509867 |
| cg22423207 | 6 | APOM | 31625421 | rs805269 | 6 | 31644282 | G | A | 0.434303 | 0.109993 | 7.87E-05 | 0.434303 | 0.109993 | 7.87E-05 | 1 | 0.261892 | 0.008509867 |
| cg00812578 | 6 | APOM | 31625701 | rs805269 | 6 | 31644282 | G | A | 0.5459 | 0.138256 | 7.87E-05 | 0.5459 | 0.138256 | 7.87E-05 | 1 | 0.165451 | 0.008509867 |
| cg03228773 | 6 | C6orf47 | 31627511 | rs2507957 | 6 | 31580245 | A | G | -0.0208845 | 0.0981381 | 0.8314771 | -0.410228 | 0.103588 | 7.49E-05 | 3 | 0.359167 | 0.008146238 |
| cg03597243 | 6 | C6orf47 | 31628156 | rs805263 | 6 | 31628113 | C | A | -0.645651 | 0.16869 | 0.000129529 | -0.602335 | 0.143142 | 2.58E-05 | 2 | 0.178281 | 0.003420975 |
| cg16197684 | 6 | BAT4 | 31630819 | rs14365 | 6 | 31635710 | C | T | 0.622713 | 0.0520153 | 5.15E-33 | 0.612618 | 0.0581781 | 6.42E-26 | 3 | 0.262708 | 4.01E-22 |
| cg10813233 | 6 | BAT4 | 31633135 | rs12529661 | 6 | 31663785 | T | A | 0.386356 | 0.0321649 | 3.18E-33 | 0.295638 | 0.072901 | 5.01E-05 | 7 | 1.20813 | 0.00585463 |
| cg21112943 | 6 | BAT4 | 31633196 | rs2077102 | 6 | 31611840 | A | C | -1.24004 | 0.103385 | 3.92E-33 | -1.19937 | 0.110265 | 1.52E-27 | 1 | 0.0656509 | 9.83E-24 |
| cg27137280 | 6 | BAT4 | 31634141 | rs805257 | 6 | 31634193 | G | A | -1.78183 | 0.191035 | 1.10E-20 | -1.22977 | 0.200004 | 7.84E-10 | 1 | 0.0119534 | 4.37E-07 |
| cg04465120 | 6 | CSNK2B | 31635200 | rs35149168 | 6 | 31635198 | C | T | -1.48003 | 0.131647 | 2.59E-29 | -1.3743 | 0.171727 | 1.23E-15 | 1 | 0.114725 | 2.26E-12 |
| cg12032533 | 6 | CSNK2B | 31635781 | rs14365 | 6 | 31635710 | C | T | 0.894457 | 0.074714 | 5.15E-33 | 0.782393 | 0.205485 | 0.000140401 | 3 | 0.166044 | 0.013647417 |
| cg20281729 | 6 | CSNK2B | 31635914 | rs14365 | 6 | 31635710 | C | T | 0.591512 | 0.049409 | 5.15E-33 | 0.576241 | 0.08008 | 6.25E-13 | 5 | 0.30497 | 6.30E-10 |
| cg07732471 | 6 | CSNK2B | 31635946 | rs14365 | 6 | 31635710 | C | T | 0.43142 | 0.0360366 | 5.15E-33 | 0.4304 | 0.0536645 | 1.07E-15 | 6 | 0.670604 | 2.01E-12 |
| cg23817343 | 6 | CSNK2B | 31636140 | rs3130487 | 6 | 31723389 | C | T | -2.65942 | 0.226865 | 1.01E-31 | -1.27563 | 0.261722 | 1.10E-06 | 1 | 0.00984126 | 0.000252197 |
| cg03337084 | 6 | LY6G5C | 31646061 | rs14365 | 6 | 31635710 | C | T | -1.074 | 0.0897113 | 5.15E-33 | -0.996786 | 0.217794 | 4.73E-06 | 2 | 0.095815 | 0.000860158 |
| cg24768187 | 6 | LY6G5C | 31646077 | rs7029 | 6 | 31629953 | G | A | -0.871562 | 0.0778741 | 4.58E-29 | -0.834954 | 0.0980398 | 1.67E-17 | 3 | 0.126038 | 4.43E-14 |
| cg00621943 | 6 | LY6G5C | 31646236 | rs14365 | 6 | 31635710 | C | T | -1.55667 | 0.130029 | 5.15E-33 | -1.25682 | 0.157318 | 1.37E-15 | 1 | 0.0240095 | 2.47E-12 |
| cg27334499 | 6 | LY6G5C | 31646366 | rs59345959 | 6 | 31630665 | A | G | 0.680683 | 0.0567032 | 3.48E-33 | 0.688853 | 0.0556822 | 3.87E-35 | 2 | 0.282325 | 6.27E-31 |
| cg17187990 | 6 | LY6G5C | 31646377 | rs59345959 | 6 | 31630665 | A | G | 1.5592 | 0.129886 | 3.48E-33 | 1.32336 | 0.169158 | 5.20E-15 | 1 | 0.0344604 | 7.59E-12 |
| cg20543183 | 6 | LY6G5C | 31648146 | rs707918 | 6 | 31654732 | A | T | 1.06727 | 0.0949738 | 2.74E-29 | 0.974282 | 0.179021 | 5.27E-08 | 2 | 0.0787923 | 1.83E-05 |
| cg09993780 | 6 | LY6G5C | 31648544 | rs7029 | 6 | 31629953 | G | A | 0.719545 | 0.0642914 | 4.58E-29 | 0.694594 | 0.130694 | 1.07E-07 | 2 | 0.140399 | 3.28E-05 |
| cg03588325 | 6 | LY6G5C | 31648948 | rs4569 | 6 | 31637807 | T | C | 1.8131 | 0.161324 | 2.70E-29 | 1.41003 | 0.209519 | 1.71E-11 | 1 | 0.0148794 | 1.47E-08 |
| cg02683578 | 6 | LY6G5C | 31649432 | rs7992 | 6 | 31630241 | T | C | -2.07426 | 0.185276 | 4.40E-29 | -1.34921 | 0.217846 | 5.91E-10 | 1 | 0.0101135 | 3.40E-07 |
| cg26450717 | 6 | - | 31650835 | rs7992 | 6 | 31630241 | T | C | -0.256581 | 0.0229182 | 4.40E-29 | -0.265221 | 0.0781214 | 0.000686428 | 13 | 3.11087 | 0.047113314 |
| cg01297670 | 6 | - | 31651070 | rs7992 | 6 | 31630241 | T | C | -0.24268 | 0.0216765 | 4.40E-29 | -0.265235 | 0.0745831 | 0.000376293 | 14 | 3.56728 | 0.029843457 |
| cg13740929 | 6 | - | 31651291 | rs7992 | 6 | 31630241 | T | C | -0.248607 | 0.0222059 | 4.40E-29 | -0.250584 | 0.0691657 | 0.000291334 | 12 | 2.72954 | 0.024257941 |
| cg02446869 | 6 | - | 31654389 | rs14365 | 6 | 31635710 | C | T | -2.07458 | 0.173289 | 5.15E-33 | -1.19648 | 0.296465 | 5.44E-05 | 1 | 0.0158016 | 0.006285763 |
| cg06151074 | 6 | BAT5 | 31669888 | rs7029 | 6 | 31629953 | G | A | 1.98152 | 0.177049 | 4.58E-29 | 1.43404 | 0.218369 | 5.16E-11 | 1 | 0.0138115 | 4.18E-08 |
| cg14986464 | 6 | BAT5 | 31669902 | rs7029 | 6 | 31629953 | G | A | 1.6926 | 0.151234 | 4.58E-29 | 1.38101 | 0.205208 | 1.71E-11 | 1 | 0.0155171 | 1.47E-08 |
| cg27198696 | 6 | LY6G6E | 31680112 | rs6905572 | 6 | 31731881 | T | C | -1.0583 | 0.135276 | 5.20E-15 | -1.02968 | 0.124511 | 1.36E-16 | 2 | 0.0595939 | 3.02E-13 |
| cg14258501 | 6 | LY6G6E | 31680228 | rs2763979 | 6 | 31794592 | T | C | -0.777957 | 0.106669 | 3.05E-13 | -0.777957 | 0.106669 | 3.05E-13 | 1 | 0.0429886 | 3.27E-10 |
| cg14437986 | 6 | C6orf25 | 31691035 | rs9267551 | 6 | 31697957 | C | G | -2.01846 | 0.172059 | 9.08E-32 | -1.05545 | 0.230997 | 4.90E-06 | 3 | 0.029967 | 0.000887217 |
| cg15973098 | 6 | C6orf25 | 31691252 | rs9267551 | 6 | 31697957 | C | G | -1.8086 | 0.154171 | 9.08E-32 | -1.16857 | 0.116226 | 8.98E-24 | 3 | 0.0370571 | 5.20E-20 |
| cg13318914 | 6 | DDAH2 | 31695061 | rs2524112 | 6 | 31231780 | G | A | -1.22404 | 0.275893 | 9.14E-06 | -1.22404 | 0.275893 | 9.14E-06 | 1 | 0.00625351 | 0.001442072 |
| cg25953692 | 6 | DDAH2 | 31695415 | rs9267551 | 6 | 31697957 | C | G | -1.94916 | 0.166153 | 9.08E-32 | -0.896879 | 0.183922 | 1.08E-06 | 2 | 0.0283506 | 0.000249488 |
| cg03900314 | 6 | DDAH2 | 31695552 | rs9267576 | 6 | 31812038 | T | G | -2.21385 | 0.189752 | 1.93E-31 | -1.25936 | 0.222641 | 1.55E-08 | 1 | 0.0138815 | 6.24E-06 |
| cg13597051 | 6 | DDAH2 | 31695599 | rs9267551 | 6 | 31697957 | C | G | -2.4243 | 0.206655 | 9.08E-32 | -1.15727 | 0.246743 | 2.73E-06 | 1 | 0.013527 | 0.000553063 |
| cg08021615 | 6 | DDAH2 | 31696161 | rs3115669 | 6 | 31619024 | T | G | -2.58002 | 0.21702 | 1.40E-32 | -1.51185 | 0.193948 | 6.49E-15 | 2 | 0.0150193 | 9.22E-12 |
| cg21286967 | 6 | DDAH2 | 31696710 | rs521977 | 6 | 31836827 | T | G | 0.888256 | 0.0810153 | 5.83E-28 | 0.744894 | 0.186079 | 6.25E-05 | 6 | 0.170549 | 0.006980906 |
| cg19334030 | 6 | DDAH2 | 31697106 | rs805826 | 6 | 31724219 | C | G | 1.57162 | 0.196721 | 1.37E-15 | 1.2585 | 0.203201 | 5.91E-10 | 1 | 0.0116376 | 3.40E-07 |
| cg24108149 | 6 | DDAH2 | 31697559 | rs1144708 | 6 | 31710020 | T | C | -0.389455 | 0.0628825 | 5.91E-10 | -0.370904 | 0.0741303 | 5.64E-07 | 2 | 0.129972 | 0.000141362 |
| cg11261908 | 6 | DDAH2 | 31697955 | rs3130487 | 6 | 31723389 | C | T | -1.4884 | 0.12697 | 1.01E-31 | -1.01939 | 0.14837 | 6.43E-12 | 1 | 0.0396166 | 5.67E-09 |
| cg15264752 | 6 | DDAH2 | 31697973 | rs3130071 | 6 | 31594628 | T | A | 0.814826 | 0.0704289 | 6.05E-31 | 0.763828 | 0.160856 | 2.05E-06 | 4 | 0.258114 | 0.000431957 |
| cg09684381 | 6 | DDAH2 | 31697988 | rs3130487 | 6 | 31723389 | C | T | -1.00513 | 0.0857439 | 1.01E-31 | -0.986407 | 0.0898441 | 4.94E-28 | 2 | 0.167496 | 3.81E-24 |
| cg02257681 | 6 | DDAH2 | 31698002 | rs3130487 | 6 | 31723389 | C | T | 0.744679 | 0.0635257 | 1.01E-31 | 0.702974 | 0.201081 | 0.000472423 | 2 | 0.305275 | 0.035258478 |
| cg00608605 | 6 | DDAH2 | 31698109 | rs805294 | 6 | 31688217 | G | A | -1.17545 | 0.191168 | 7.84E-10 | -1.17545 | 0.191168 | 7.84E-10 | 1 | 0.0130942 | 4.37E-07 |
| cg00124375 | 6 | DDAH2 | 31698218 | rs805826 | 6 | 31724219 | C | G | 0.729305 | 0.091288 | 1.37E-15 | 0.949467 | 0.184725 | 2.75E-07 | 4 | 0.109487 | 7.47E-05 |
| cg17983217 | 6 | DDAH2 | 31698223 | rs805826 | 6 | 31724219 | C | G | 1.0536 | 0.131881 | 1.37E-15 | 0.94106 | 0.257319 | 0.000255075 | 2 | 0.0406632 | 0.0217986 |
| cg18055007 | 6 | DDAH2 | 31698226 | rs805826 | 6 | 31724219 | C | G | 0.9964 | 0.124721 | 1.37E-15 | 1.05852 | 0.125144 | 2.75E-17 | 2 | 0.0476044 | 6.95E-14 |
| cg12506597 | 6 | CLIC1 | 31699709 | rs3130486 | 6 | 31722780 | T | C | -0.781613 | 0.181227 | 1.61E-05 | -0.937897 | 0.266982 | 0.000443225 | 2 | 0.0229428 | 0.033576809 |
| cg16460356 | 6 | MSH5 | 31707744 | rs3131382 | 6 | 31707730 | T | C | 0.73245 | 0.0912945 | 1.04E-15 | 0.73245 | 0.0912945 | 1.04E-15 | 1 | 0.252812 | 1.99E-12 |
| cg03605661 | 6 | MSH5 | 31707750 | rs3131382 | 6 | 31707730 | T | C | 0.556718 | 0.0693908 | 1.04E-15 | 0.556718 | 0.0693908 | 1.04E-15 | 1 | 0.437856 | 1.99E-12 |
| cg11431101 | 6 | C6orf26 | 31731874 | rs6905572 | 6 | 31731881 | T | C | -1.59102 | 0.203371 | 5.20E-15 | -1.47298 | 0.219163 | 1.82E-11 | 1 | 0.0178071 | 1.56E-08 |
| cg18997124 | 6 | C6orf27 | 31740268 | rs2596503 | 6 | 31320810 | A | G | -1.37559 | 0.267838 | 2.81E-07 | -1.37559 | 0.267838 | 2.81E-07 | 1 | 0.0105586 | 7.58E-05 |
| cg12988118 | 6 | C6orf27 | 31744524 | rs707929 | 6 | 31742067 | G | A | 0.829989 | 0.132141 | 3.38E-10 | 0.845153 | 0.10907 | 9.37E-15 | 2 | 0.0491188 | 1.29E-11 |
| cg23916646 | 6 | C6orf27 | 31744545 | rs707929 | 6 | 31742067 | G | A | 0.706632 | 0.112502 | 3.38E-10 | 0.804933 | 0.172173 | 2.94E-06 | 2 | 0.051817 | 0.000581425 |
| cg12383352 | 6 | C6orf27 | 31744612 | rs707928 | 6 | 31742590 | G | A | 0.652516 | 0.105386 | 5.98E-10 | 0.754212 | 0.191327 | 8.08E-05 | 2 | 0.0570355 | 0.008690751 |
| cg11228624 | 6 | VARS | 31748762 | rs494718 | 6 | 31772516 | A | G | -1.02431 | 0.129913 | 3.19E-15 | -1.02431 | 0.129913 | 3.19E-15 | 1 | 0.0464639 | 5.11E-12 |
| cg00649734 | 6 | VARS | 31750470 | rs9469060 | 6 | 31804715 | A | T | 0.648295 | 0.162106 | 6.36E-05 | 0.648295 | 0.162106 | 6.36E-05 | 1 | 0.164682 | 0.007075347 |
| cg00202479 | 6 | VARS | 31760383 | rs204991 | 6 | 32161366 | C | T | 0.862449 | 0.232995 | 0.000214321 | 0.862449 | 0.232995 | 0.000214321 | 1 | 0.0130975 | 0.019059303 |
| cg26346875 | 6 | VARS | 31762719 | rs7451017 | 6 | 31820659 | T | C | -1.85796 | 0.153222 | 7.94E-34 | -1.04572 | 0.163366 | 1.55E-10 | 1 | 0.0224144 | 1.07E-07 |
| cg13014333 | 6 | VARS | 31762776 | rs1043618 | 6 | 31783507 | C | G | -0.705912 | 0.105996 | 2.76E-11 | -0.705912 | 0.105996 | 2.76E-11 | 1 | 0.0421496 | 2.35E-08 |
| cg15665090 | 6 | HSPA1L | 31778371 | rs2227956 | 6 | 31778272 | G | A | 3.5877 | 0.299014 | 3.73E-33 | 1.65773 | 0.31382 | 1.28E-07 | 1 | 0.00760268 | 3.80E-05 |
| cg26170066 | 6 | HSPA1B | 31794759 | rs707928 | 6 | 31742590 | G | A | 1.18694 | 0.1917 | 5.98E-10 | 1.18694 | 0.1917 | 5.98E-10 | 1 | 0.013408 | 3.42E-07 |
| cg21080034 | 6 | HSPA1B | 31797874 | rs3115673 | 6 | 31810085 | T | G | 0.655705 | 0.076373 | 9.16E-18 | 0.421363 | 0.109994 | 0.000127772 | 6 | 0.870052 | 0.012661338 |
| cg17354785 | 6 | - | 31798069 | rs2261033 | 6 | 31603591 | A | G | -1.88841 | 0.207834 | 1.04E-19 | -1.44214 | 0.220743 | 6.47E-11 | 2 | 0.0174568 | 5.02E-08 |
| cg06804823 | 6 | - | 31798635 | rs2261033 | 6 | 31603591 | A | G | -0.374208 | 0.0411844 | 1.04E-19 | -0.278027 | 0.0816464 | 0.000661109 | 12 | 2.49849 | 0.045758525 |
| cg16656520 | 6 | - | 31800885 | rs1265944 | 6 | 31816497 | C | T | -0.571042 | 0.0664251 | 8.30E-18 | -0.340702 | 0.093712 | 0.000277376 | 7 | 0.596954 | 0.023396157 |
| cg06482498 | 6 | C6orf48 | 31802029 | rs614549 | 6 | 31840625 | G | A | -1.10007 | 0.218294 | 4.68E-07 | -1.10007 | 0.218294 | 4.68E-07 | 1 | 0.0101452 | 0.000119418 |
| cg03446203 | 6 | C6orf48 | 31802173 | rs3130486 | 6 | 31722780 | T | C | 1.07452 | 0.249141 | 1.61E-05 | 1.07452 | 0.249141 | 1.61E-05 | 1 | 0.00901299 | 0.002295117 |
| cg02522311 | 6 | C6orf48 | 31802286 | rs6905572 | 6 | 31731881 | T | C | 1.03105 | 0.131792 | 5.20E-15 | 1.03105 | 0.131792 | 5.20E-15 | 1 | 0.0568862 | 7.59E-12 |
| cg27349795 | 6 | C6orf48 | 31802397 | rs6905572 | 6 | 31731881 | T | C | 0.558853 | 0.0714349 | 5.20E-15 | 0.5877 | 0.120718 | 1.13E-06 | 4 | 0.261017 | 0.000258024 |
| cg12678191 | 6 | C6orf48 | 31802415 | rs6905572 | 6 | 31731881 | T | C | 1.22337 | 0.156377 | 5.20E-15 | 1.22337 | 0.156377 | 5.20E-15 | 1 | 0.0403544 | 7.59E-12 |
| cg26943082 | 6 | C6orf48 | 31802422 | rs6905572 | 6 | 31731881 | T | C | 0.754832 | 0.0964856 | 5.20E-15 | 0.754832 | 0.0964856 | 5.20E-15 | 1 | 0.106305 | 7.59E-12 |
| cg19404977 | 6 | C6orf48 | 31802507 | rs6905572 | 6 | 31731881 | T | C | 0.911396 | 0.116498 | 5.20E-15 | 0.867412 | 0.147095 | 3.72E-09 | 3 | 0.0842745 | 1.80E-06 |
| cg08566044 | 6 | C6orf48 | 31802711 | rs3749953 | 6 | 31713124 | G | A | 1.45256 | 0.185916 | 5.64E-15 | 1.22756 | 0.197543 | 5.18E-10 | 1 | 0.0319414 | 3.08E-07 |
| cg20109054 | 6 | C6orf48 | 31804109 | rs4947253 | 6 | 31820159 | T | C | 0.896703 | 0.116148 | 1.17E-14 | 0.835614 | 0.209765 | 6.79E-05 | 2 | 0.0815442 | 0.007464928 |
| cg01657995 | 6 | C6orf48 | 31804883 | rs6905572 | 6 | 31731881 | T | C | 0.921802 | 0.117828 | 5.20E-15 | 0.881107 | 0.172877 | 3.46E-07 | 2 | 0.0750487 | 9.18E-05 |
| cg21116447 | 6 | NEU1 | 31831803 | rs182142262 | 6 | 31926690 | T | G | 0.685177 | 0.129481 | 1.21E-07 | 0.685177 | 0.129481 | 1.21E-07 | 1 | 0.567316 | 3.69E-05 |
| cg25560247 | 6 | NEU1 | 31832173 | rs574914 | 6 | 31819376 | A | G | -0.802466 | 0.0951024 | 3.27E-17 | -0.802466 | 0.0951024 | 3.27E-17 | 1 | 0.0889882 | 8.16E-14 |
| cg00031491 | 6 | SLC44A4 | 31837439 | rs2242664 | 6 | 31839331 | C | T | 1.41391 | 0.331572 | 2.01E-05 | 1.41391 | 0.331572 | 2.01E-05 | 1 | 0.00409845 | 0.002747986 |
| cg18445760 | 6 | SLC44A4 | 31837445 | rs660550 | 6 | 31837277 | C | A | 1.16477 | 0.272095 | 1.86E-05 | 1.16477 | 0.272095 | 1.86E-05 | 1 | 0.00612498 | 0.002598529 |
| cg10969178 | 6 | SLC44A4 | 31838402 | rs605203 | 6 | 31847012 | C | A | -1.74138 | 0.218664 | 1.69E-15 | -0.955646 | 0.224106 | 2.01E-05 | 1 | 0.00907532 | 0.002747986 |
| cg25600103 | 6 | SLC44A4 | 31838413 | rs2242664 | 6 | 31839331 | C | T | -0.425601 | 0.0998064 | 2.01E-05 | -0.425601 | 0.0998064 | 2.01E-05 | 1 | 0.0461086 | 0.002747986 |
| cg02252769 | 6 | SLC44A4 | 31838528 | rs2242664 | 6 | 31839331 | C | T | 0.451367 | 0.105849 | 2.01E-05 | 0.451367 | 0.105849 | 2.01E-05 | 1 | 0.0409852 | 0.002747986 |
| cg27587935 | 6 | SLC44A4 | 31838724 | rs494620 | 6 | 31838713 | A | G | -0.442609 | 0.0854619 | 2.23E-07 | -0.442609 | 0.0854619 | 2.23E-07 | 1 | 0.063814 | 6.18E-05 |
| cg05841219 | 6 | SLC44A4 | 31840947 | rs9267653 | 6 | 31840415 | T | C | 1.38628 | 0.216568 | 1.55E-10 | 1.38628 | 0.216568 | 1.55E-10 | 1 | 0.0126972 | 1.07E-07 |
| cg26138846 | 6 | SLC44A4 | 31842729 | rs527254 | 6 | 31841641 | A | G | -0.782135 | 0.176789 | 9.69E-06 | -0.782135 | 0.176789 | 9.69E-06 | 1 | 0.0151923 | 0.001518159 |
| cg11726150 | 6 | SLC44A4 | 31845172 | rs605203 | 6 | 31847012 | C | A | -1.03315 | 0.129731 | 1.69E-15 | -1.03315 | 0.129731 | 1.69E-15 | 1 | 0.031526 | 2.97E-12 |
| cg09298971 | 6 | SLC44A4 | 31846249 | rs9267659 | 6 | 31846234 | A | G | 0.440541 | 0.0501681 | 1.64E-18 | 0.431304 | 0.102553 | 2.60E-05 | 4 | 0.357021 | 0.003447059 |
| cg23798942 | 6 | EHMT2 | 31854251 | rs610265 | 6 | 31853873 | G | A | 0.655931 | 0.171534 | 0.000131397 | 0.655931 | 0.171534 | 0.000131397 | 1 | 0.0619979 | 0.012871081 |
| cg12087303 | 6 | EHMT2 | 31854429 | rs6457457 | 6 | 31878108 | T | C | 1.24575 | 0.34391 | 0.000292047 | 1.24575 | 0.34391 | 0.000292047 | 1 | 0.0154688 | 0.024265244 |
| cg13613346 | 6 | EHMT2 | 31855008 | rs144007819 | 6 | 31855008 | T | C | 0.391305 | 0.0645169 | 1.32E-09 | 0.36807 | 0.106386 | 0.000540726 | 3 | 3.16568 | 0.039029747 |
| cg02917399 | 6 | EHMT2 | 31860203 | rs1265945 | 6 | 31861815 | G | A | 2.26543 | 0.284896 | 1.86E-15 | 1.28137 | 0.257985 | 6.82E-07 | 1 | 0.00756856 | 0.000166169 |
| cg14862260 | 6 | EHMT2 | 31860279 | rs1265945 | 6 | 31861815 | G | A | 1.52677 | 0.192004 | 1.86E-15 | 0.957449 | 0.195788 | 1.01E-06 | 1 | 0.0122302 | 0.000233572 |
| cg09832108 | 6 | EHMT2 | 31862925 | rs148571474 | 6 | 31672712 | T | C | -0.939391 | 0.191198 | 8.97E-07 | -0.939391 | 0.191198 | 8.97E-07 | 1 | 0.116141 | 0.000212705 |
| cg22810281 | 6 | EHMT2 | 31863252 | rs605203 | 6 | 31847012 | C | A | 1.29535 | 0.162656 | 1.69E-15 | 1.29535 | 0.162656 | 1.69E-15 | 1 | 0.020022 | 2.97E-12 |
| cg09578086 | 6 | EHMT2 | 31866778 | rs3132442 | 6 | 31839494 | C | T | -1.06198 | 0.276204 | 0.000120644 | -1.06198 | 0.276204 | 0.000120644 | 1 | 0.00588452 | 0.01213054 |
| cg17177931 | 6 | ZBTB12 | 31870344 | rs3129897 | 6 | 32421469 | A | G | -1.19708 | 0.340136 | 0.000432584 | -1.19708 | 0.340136 | 0.000432584 | 1 | 0.00811339 | 0.033002009 |
| cg07508649 | 6 | - | 31873772 | rs1313996 | 6 | 31876042 | T | A | 1.92219 | 0.240767 | 1.44E-15 | -0.874765 | 0.220088 | 7.05E-05 | 1 | 0.0122773 | 0.007699253 |
| cg04945153 | 6 | CFB | 31914068 | rs12614 | 6 | 31914179 | T | C | 0.564005 | 0.158096 | 0.000360515 | 0.564005 | 0.158096 | 0.000360515 | 1 | 0.054555 | 0.028890524 |
| cg17335741 | 6 | CFB | 31914265 | rs3020644 | 6 | 31894626 | G | A | -1.07089 | 0.203624 | 1.45E-07 | -1.07089 | 0.203624 | 1.45E-07 | 1 | 0.0112865 | 4.24E-05 |
| cg08810053 | 6 | RDBP | 31926072 | rs114408539 | 6 | 31879740 | A | G | -0.580912 | 0.124884 | 3.30E-06 | -0.580912 | 0.124884 | 3.30E-06 | 1 | 0.157005 | 0.000634071 |
| cg13069441 | 6 | STK19 | 31939322 | rs2844514 | 6 | 31380340 | C | T | 1.77417 | 0.321881 | 3.56E-08 | 1.52932 | 0.277625 | 3.63E-08 | 1 | 0.00598986 | 1.30E-05 |
| cg23760574 | 6 | TNXB | 32038097 | rs17207951 | 6 | 32050653 | T | C | 0.447254 | 0.160086 | 0.005208797 | 0.502265 | 0.133037 | 0.000159823 | 2 | 0.0354017 | 0.015037749 |
| cg24884217 | 6 | TNXB | 32038155 | rs2523834 | 6 | 31109946 | A | T | -1.39415 | 0.391799 | 0.000373294 | -1.39415 | 0.391799 | 0.000373294 | 1 | 0.00321635 | 0.029713922 |
| cg22056544 | 6 | TNXB | 32038230 | rs17207951 | 6 | 32050653 | T | C | 0.255096 | 0.0913068 | 0.005208797 | 0.311012 | 0.0889656 | 0.000472601 | 2 | 0.0877111 | 0.035258478 |
| cg23462632 | 6 | TNXB | 32038881 | rs2857009 | 6 | 32019746 | C | G | 0.228409 | 0.0800495 | 0.004326215 | 0.266942 | 0.0694658 | 0.000121692 | 2 | 0.12641 | 0.012178737 |
| cg00617292 | 6 | TNXB | 32038958 | rs28361052 | 6 | 32032205 | C | G | 0.248565 | 0.0900746 | 0.005788234 | 0.296017 | 0.0783041 | 0.000156661 | 2 | 0.0982895 | 0.014889319 |
| cg02927981 | 6 | TNXB | 32042430 | rs3130286 | 6 | 32042322 | T | C | -1.10764 | 0.19582 | 1.55E-08 | -1.10764 | 0.19582 | 1.55E-08 | 1 | 0.0179894 | 6.24E-06 |
| cg23164535 | 6 | TNXB | 32044869 | rs9267798 | 6 | 32044834 | C | G | 0.184411 | 0.0344671 | 8.80E-08 | 0.268058 | 0.0760039 | 0.000420532 | 8 | 1.70729 | 0.032310587 |
| cg07010582 | 6 | TNXB | 32046308 | rs9332730 | 6 | 31912009 | C | G | 1.21062 | 0.272906 | 9.17E-06 | 1.21062 | 0.272906 | 9.17E-06 | 1 | 0.0307433 | 0.001444474 |
| cg14737484 | 6 | TNXB | 32054561 | rs2844452 | 6 | 31882024 | G | A | 0.506776 | 0.0988509 | 2.95E-07 | 0.588121 | 0.121955 | 1.42E-06 | 4 | 0.233686 | 0.000314021 |
| cg02352370 | 6 | TNXB | 32054845 | rs2844452 | 6 | 31882024 | G | A | 0.397147 | 0.0774669 | 2.95E-07 | 0.588854 | 0.129303 | 5.27E-06 | 5 | 0.235074 | 0.000935129 |
| cg26346796 | 6 | TNXB | 32054867 | rs2844452 | 6 | 31882024 | G | A | 0.450589 | 0.0878912 | 2.95E-07 | 0.474074 | 0.130805 | 0.000289835 | 6 | 0.341745 | 0.024145494 |
| cg14161269 | 6 | TNXB | 32054898 | rs79594290 | 6 | 32066320 | T | C | 0.386682 | 0.0795332 | 1.16E-06 | 0.405967 | 0.107761 | 0.000165081 | 5 | 0.583392 | 0.015469635 |
| cg19609334 | 6 | TNXB | 32056249 | rs3134954 | 6 | 32071893 | C | T | 0.435541 | 0.0376793 | 6.82E-31 | 0.38757 | 0.0852512 | 5.47E-06 | 6 | 0.906729 | 0.000962366 |
| cg00169019 | 6 | TNXB | 32056438 | rs2734325 | 6 | 31945646 | T | C | 0.929695 | 0.231002 | 5.71E-05 | 0.929695 | 0.231002 | 5.71E-05 | 1 | 0.0092934 | 0.006536942 |
| cg21189146 | 6 | TNXB | 32069841 | rs3134953 | 6 | 32109165 | G | A | -1.33874 | 0.116104 | 9.52E-31 | -1.22508 | 0.141486 | 4.83E-18 | 1 | 0.0426397 | 1.35E-14 |
| cg14626759 | 6 | TNXB | 32073962 | rs6457457 | 6 | 31878108 | T | C | 1.05856 | 0.292233 | 0.000292047 | 1.05856 | 0.292233 | 0.000292047 | 1 | 0.0214095 | 0.024265244 |
| cg10736208 | 6 | TNXB | 32078398 | rs3807039 | 6 | 32078373 | C | A | 0.464997 | 0.047859 | 2.62E-22 | 0.384186 | 0.111509 | 0.000570457 | 6 | 0.575371 | 0.040601409 |
| cg05619785 | 6 | TNXB | 32078574 | rs61745355 | 6 | 32021414 | T | C | 1.21147 | 0.225509 | 7.80E-08 | 1.21147 | 0.225509 | 7.80E-08 | 1 | 0.0899694 | 2.52E-05 |
| cg19004565 | 6 | ATF6B | 32086893 | rs10947341 | 6 | 32720632 | C | T | 1.15376 | 0.305877 | 0.000162006 | 1.15376 | 0.305877 | 0.000162006 | 1 | 0.00487532 | 0.015225474 |
| cg08386009 | 6 | ATF6B | 32094845 | rs204886 | 6 | 32029415 | T | C | 0.984099 | 0.189045 | 1.94E-07 | 0.984099 | 0.189045 | 1.94E-07 | 1 | 0.0128596 | 5.53E-05 |
| cg02713232 | 6 | ATF6B | 32096331 | rs115521560 | 6 | 32019382 | C | A | 0.705842 | 0.188536 | 0.000181306 | 0.705842 | 0.188536 | 0.000181306 | 1 | 0.100983 | 0.016672671 |
| cg02287105 | 6 | - | 32115284 | rs143384650 | 6 | 32056897 | C | T | 0.469949 | 0.0820827 | 1.04E-08 | 0.458557 | 0.111301 | 3.79E-05 | 2 | 1.59208 | 0.00470954 |
| cg08505243 | 6 | - | 32116112 | rs3131283 | 6 | 32119898 | T | C | -2.20332 | 0.190117 | 4.81E-31 | -1.38918 | 0.217022 | 1.55E-10 | 1 | 0.0126521 | 1.07E-07 |
| cg26849331 | 6 | PRRT1 | 32116216 | rs521977 | 6 | 31836827 | T | G | -2.03718 | 0.185805 | 5.83E-28 | -1.28773 | 0.263327 | 1.01E-06 | 1 | 0.00672232 | 0.000233572 |
| cg07241479 | 6 | PRRT1 | 32116225 | rs521977 | 6 | 31836827 | T | G | -2.4081 | 0.219636 | 5.83E-28 | -1.52037 | 0.231346 | 5.00E-11 | 1 | 0.00870059 | 4.09E-08 |
| cg08376141 | 6 | PRRT1 | 32116591 | rs2227956 | 6 | 31778272 | G | A | -2.3198 | 0.193341 | 3.73E-33 | -1.35959 | 0.212398 | 1.55E-10 | 1 | 0.013208 | 1.07E-07 |
| cg14644001 | 6 | PRRT1 | 32116653 | rs2227956 | 6 | 31778272 | G | A | -2.89494 | 0.241276 | 3.73E-33 | -1.28004 | 0.261754 | 1.01E-06 | 1 | 0.00680437 | 0.000233572 |
| cg04630292 | 6 | PRRT1 | 32116994 | rs521977 | 6 | 31836827 | T | G | -1.48545 | 0.135484 | 5.83E-28 | -1.18012 | 0.141519 | 7.58E-17 | 2 | 0.0261956 | 1.78E-13 |
| cg18501647 | 6 | PRRT1 | 32117379 | rs521977 | 6 | 31836827 | T | G | -1.91591 | 0.174745 | 5.83E-28 | -1.26146 | 0.161215 | 5.14E-15 | 2 | 0.0208634 | 7.59E-12 |
| cg21241317 | 6 | PPT2 | 32122736 | rs3134604 | 6 | 32122386 | C | G | 1.00675 | 0.0937914 | 7.22E-27 | 0.943283 | 0.192148 | 9.16E-07 | 2 | 0.167215 | 0.000216484 |
| cg27070869 | 6 | PPT2 | 32122779 | rs3117181 | 6 | 32071017 | C | G | 1.74207 | 0.150532 | 5.83E-31 | 1.12979 | 0.167217 | 1.42E-11 | 2 | 0.0293827 | 1.25E-08 |
| cg00086577 | 6 | PPT2 | 32122894 | rs3134604 | 6 | 32122386 | C | G | 0.507535 | 0.0472835 | 7.22E-27 | 0.341875 | 0.0993072 | 0.000576251 | 6 | 1.02799 | 0.040955786 |
| cg24509300 | 6 | PPT2 | 32123034 | rs3134604 | 6 | 32122386 | C | G | 0.74211 | 0.0691371 | 7.22E-27 | 0.737518 | 0.0666131 | 1.77E-28 | 2 | 0.28615 | 1.43E-24 |
| cg17188367 | 6 | RNF5P1 | 32145165 | rs553108 | 6 | 31840455 | A | G | -1.61084 | 0.227264 | 1.37E-12 | -1.13118 | 0.231314 | 1.01E-06 | 1 | 0.0087373 | 0.000233572 |
| cg18265845 | 6 | RNF5 | 32147440 | rs204993 | 6 | 32155581 | G | A | 0.473814 | 0.137128 | 0.000549843 | 0.473814 | 0.137128 | 0.000549843 | 1 | 0.0300453 | 0.039546946 |
| cg09615020 | 6 | RNF5 | 32147753 | rs521977 | 6 | 31836827 | T | G | 1.42096 | 0.129601 | 5.83E-28 | 1.24309 | 0.113458 | 6.35E-28 | 1 | 0.0466256 | 4.29E-24 |
| cg20638582 | 6 | AGER | 32151457 | rs17201192 | 6 | 31786365 | T | G | -0.950585 | 0.23159 | 4.05E-05 | -0.950585 | 0.23159 | 4.05E-05 | 1 | 0.0796499 | 0.004980647 |
| cg10017982 | 6 | PBX2 | 32155783 | rs204993 | 6 | 32155581 | G | A | -0.685246 | 0.198319 | 0.000549843 | -0.685246 | 0.198319 | 0.000549843 | 1 | 0.014287 | 0.039546946 |
| cg16513215 | 6 | GPSM3 | 32164588 | rs9267797 | 6 | 32030700 | T | C | 0.425617 | 0.114055 | 0.000190253 | 0.431518 | 0.110695 | 9.69E-05 | 2 | 0.501867 | 0.010170907 |
| cg15919612 | 6 | NOTCH4 | 32172681 | rs3128980 | 6 | 31402837 | A | G | -1.49982 | 0.345425 | 1.41E-05 | -1.49982 | 0.345425 | 1.41E-05 | 1 | 0.00382724 | 0.002036952 |
| cg23089723 | 6 | NOTCH4 | 32178017 | rs28732208 | 6 | 32385119 | T | C | -0.974045 | 0.245914 | 7.47E-05 | -0.974045 | 0.245914 | 7.47E-05 | 1 | 0.0128685 | 0.008132224 |
| cg23585168 | 6 | NOTCH4 | 32178215 | rs6913309 | 6 | 32339840 | A | T | -0.930874 | 0.248644 | 0.000181313 | -0.930874 | 0.248644 | 0.000181313 | 1 | 0.0095825 | 0.016672671 |
| cg18943331 | 6 | NOTCH4 | 32179862 | rs3130285 | 6 | 32026257 | T | C | 1.92355 | 0.164686 | 1.66E-31 | 1.37816 | 0.195392 | 1.76E-12 | 1 | 0.0210802 | 1.64E-09 |
| cg03145486 | 6 | NOTCH4 | 32180187 | rs3132946 | 6 | 32190028 | A | G | 0.783697 | 0.066366 | 3.62E-32 | 0.733766 | 0.125482 | 5.00E-09 | 3 | 0.299894 | 2.37E-06 |
| cg16809040 | 6 | NOTCH4 | 32189610 | rs204990 | 6 | 32161430 | A | C | -0.466156 | 0.126182 | 0.000220551 | -0.466156 | 0.126182 | 0.000220551 | 1 | 0.0450107 | 0.019485059 |
| cg14700707 | 6 | NOTCH4 | 32191840 | rs112496097 | 6 | 32194206 | A | G | 0.534059 | 0.0520275 | 1.04E-24 | 0.534171 | 0.115839 | 4.01E-06 | 5 | 0.913033 | 0.000754996 |
| cg11720950 | 6 | - | 32223114 | rs9268106 | 6 | 32247115 | T | A | -0.429237 | 0.036969 | 3.74E-31 | -0.402442 | 0.106075 | 0.000148318 | 6 | 0.914157 | 0.014261488 |
| cg17990771 | 6 | - | 32223226 | rs9268106 | 6 | 32247115 | T | A | -0.638292 | 0.0549744 | 3.74E-31 | -0.614632 | 0.113333 | 5.87E-08 | 2 | 0.395588 | 1.97E-05 |
| cg19263700 | 6 | - | 32223236 | rs9268106 | 6 | 32247115 | T | A | -0.432073 | 0.0372133 | 3.74E-31 | -0.407911 | 0.0724945 | 1.84E-08 | 6 | 0.949192 | 7.24E-06 |
| cg01860396 | 6 | C6orf10 | 32264336 | rs1265756 | 6 | 32302672 | A | G | 0.756215 | 0.211185 | 0.000342602 | 0.756215 | 0.211185 | 0.000342602 | 1 | 0.0182347 | 0.027605173 |
| cg23245898 | 6 | C6orf10 | 32269215 | rs6457530 | 6 | 32248176 | T | C | -0.535394 | 0.123398 | 1.43E-05 | -0.535394 | 0.123398 | 1.43E-05 | 1 | 0.0409064 | 0.002062777 |
| cg10453756 | 6 | C6orf10 | 32272788 | rs3130331 | 6 | 32231483 | T | C | -0.783731 | 0.177255 | 9.81E-06 | -0.783731 | 0.177255 | 9.81E-06 | 1 | 0.01995 | 0.001532181 |
| cg25809697 | 6 | C6orf10 | 32273347 | rs9268125 | 6 | 32252678 | C | T | -0.591017 | 0.135302 | 1.25E-05 | -0.497551 | 0.128621 | 0.000109619 | 2 | 0.0840683 | 0.011205014 |
| cg06012932 | 6 | C6orf10 | 32274241 | rs3864303 | 6 | 32281621 | G | A | -0.540708 | 0.124511 | 1.41E-05 | -0.540708 | 0.124511 | 1.41E-05 | 1 | 0.039781 | 0.002035354 |
| cg22499572 | 6 | C6orf10 | 32283840 | rs3096684 | 6 | 32234345 | T | C | 0.647663 | 0.146373 | 9.66E-06 | 0.647663 | 0.146373 | 9.66E-06 | 1 | 0.0292598 | 0.0015151 |
| cg19721802 | 6 | C6orf10 | 32301389 | rs6913664 | 6 | 32295874 | C | T | -0.872432 | 0.110686 | 3.25E-15 | -0.872432 | 0.110686 | 3.25E-15 | 1 | 0.0368907 | 5.17E-12 |
| cg13279700 | 6 | C6orf10 | 32313583 | rs3117132 | 6 | 32314483 | T | C | -0.689902 | 0.0895402 | 1.32E-14 | -0.689902 | 0.0895402 | 1.32E-14 | 1 | 0.0827106 | 1.77E-11 |
| cg05198093 | 6 | C6orf10 | 32315772 | rs9268081 | 6 | 32234412 | G | A | -0.789947 | 0.137659 | 9.58E-09 | -0.789947 | 0.137659 | 9.58E-09 | 1 | 0.0278765 | 4.29E-06 |
| cg25145195 | 6 | C6orf10 | 32340955 | rs9268406 | 6 | 32342129 | T | C | 1.51187 | 0.253158 | 2.35E-09 | 1.51187 | 0.253158 | 2.35E-09 | 1 | 0.00844612 | 1.19E-06 |
| cg16487292 | 6 | BTNL2 | 32362551 | rs17202372 | 6 | 32361255 | G | A | -0.648058 | 0.156003 | 3.27E-05 | -0.648058 | 0.156003 | 3.27E-05 | 1 | 0.0357723 | 0.004154028 |
| cg06557067 | 6 | BTNL2 | 32362593 | rs72847907 | 6 | 32359611 | G | A | 0.702497 | 0.191509 | 0.000244321 | 0.702497 | 0.191509 | 0.000244321 | 1 | 0.0228757 | 0.021102054 |
| cg15585183 | 6 | BTNL2 | 32363325 | rs3817981 | 6 | 32360945 | C | T | -0.647666 | 0.155117 | 2.98E-05 | -0.647666 | 0.155117 | 2.98E-05 | 1 | 0.0362981 | 0.003859775 |
| cg03371894 | 6 | BTNL2 | 32363875 | rs9268491 | 6 | 32374131 | G | C | -0.636219 | 0.0979846 | 8.45E-11 | -0.636219 | 0.0979846 | 8.45E-11 | 1 | 0.0552531 | 6.29E-08 |
| cg12486993 | 6 | BTNL2 | 32364862 | rs3817963 | 6 | 32368087 | C | T | 0.578375 | 0.0917894 | 2.97E-10 | 0.578375 | 0.0917894 | 2.97E-10 | 1 | 0.0621643 | 1.92E-07 |
| cg17232583 | 6 | BTNL2 | 32369227 | rs6457592 | 6 | 32425983 | T | C | -1.39335 | 0.144444 | 5.19E-22 | -0.591605 | 0.135846 | 1.33E-05 | 2 | 0.0534133 | 0.001931415 |
| cg18104646 | 6 | BTNL2 | 32371235 | rs9268482 | 6 | 32367777 | T | A | 1.24651 | 0.191728 | 8.00E-11 | 1.24651 | 0.191728 | 8.00E-11 | 1 | 0.0143035 | 6.00E-08 |
| cg15319032 | 6 | BTNL2 | 32371506 | rs3763313 | 6 | 32376471 | C | A | 1.38161 | 0.105026 | 1.65E-39 | 0.526208 | 0.120194 | 1.20E-05 | 2 | 0.0963968 | 0.001792743 |
| cg21171279 | 6 | BTNL2 | 32372943 | rs73400865 | 6 | 32372032 | G | A | -0.929173 | 0.0714268 | 1.13E-38 | -0.929173 | 0.0714268 | 1.13E-38 | 1 | 0.291052 | 4.59E-34 |
| cg16615014 | 6 | - | 32381420 | rs9268521 | 6 | 32381374 | C | G | 0.322992 | 0.0479203 | 1.59E-11 | 0.299657 | 0.0876599 | 0.000630005 | 4 | 0.350462 | 0.044004519 |
| cg18670258 | 6 | - | 32383424 | rs3135358 | 6 | 32390748 | T | C | 0.583139 | 0.123722 | 2.44E-06 | 0.583139 | 0.123722 | 2.44E-06 | 1 | 0.0563478 | 0.000503971 |
| cg26928531 | 6 | HLA-DRA | 32407714 | rs9268543 | 6 | 32384801 | T | A | -2.32956 | 0.322627 | 5.21E-13 | -1.71644 | 0.36281 | 2.24E-06 | 1 | 0.00632045 | 0.000466194 |
| cg15591384 | 6 | HLA-DRB6 | 32525960 | rs477515 | 6 | 32569691 | A | G | 0.387521 | 0.0467296 | 1.12E-16 | 0.387521 | 0.0467296 | 1.12E-16 | 1 | 0.226217 | 2.52E-13 |
| cg15982117 | 6 | HLA-DRB1 | 32552106 | rs3129865 | 6 | 32404048 | G | C | 0.343366 | 0.0290212 | 2.76E-32 | 0.275033 | 0.072428 | 0.000146311 | 11 | 3.20878 | 0.014093622 |
| cg01745539 | 6 | HLA-DQB1 | 32632331 | rs3129720 | 6 | 32663631 | T | C | -0.379256 | 0.0269233 | 4.80E-45 | -0.276021 | 0.0792924 | 0.000499549 | 9 | 2.38181 | 0.037013438 |
| cg10180404 | 6 | HLA-DQB1 | 32632334 | rs3129720 | 6 | 32663631 | T | C | -0.389724 | 0.0276665 | 4.80E-45 | -0.268875 | 0.0793976 | 0.000708152 | 9 | 2.45495 | 0.048277338 |
| cg05341252 | 6 | HLA-DQB1 | 32632715 | rs3134968 | 6 | 32674059 | A | G | 0.367365 | 0.0274627 | 8.58E-41 | 0.366151 | 0.063666 | 8.89E-09 | 11 | 2.55058 | 4.03E-06 |
| cg03202060 | 6 | HLA-DQB1 | 32633015 | rs3129720 | 6 | 32663631 | T | C | 0.3474 | 0.0246619 | 4.80E-45 | 0.339016 | 0.0946079 | 0.00033925 | 10 | 2.3147 | 0.027389562 |
| cg08964730 | 6 | HLA-DQB1 | 32634009 | rs3129720 | 6 | 32663631 | T | C | -0.56277 | 0.039951 | 4.80E-45 | -0.476553 | 0.114527 | 3.17E-05 | 7 | 0.958048 | 0.004040835 |
| cg13353717 | 6 | HLA-DQB1 | 32634276 | rs3129720 | 6 | 32663631 | T | C | 0.356801 | 0.0253293 | 4.80E-45 | 0.302416 | 0.0847301 | 0.000358195 | 12 | 2.85217 | 0.028747245 |
| cg05724777 | 6 | HLA-DQB1 | 32634362 | rs3129720 | 6 | 32663631 | T | C | 0.518155 | 0.0367838 | 4.80E-45 | 0.434705 | 0.124856 | 0.000498428 | 11 | 1.56136 | 0.03694725 |
| cg02786267 | 6 | HLA-DQA2 | 32708524 | rs9276407 | 6 | 32710307 | A | G | 0.819126 | 0.235484 | 0.000504366 | 0.819126 | 0.235484 | 0.000504366 | 1 | 0.01415 | 0.03728951 |
| cg22282941 | 6 | HLA-DQA2 | 32709511 | rs17219918 | 6 | 32734536 | A | G | -0.599783 | 0.122567 | 9.92E-07 | -0.6377 | 0.112169 | 1.31E-08 | 2 | 0.154811 | 5.43E-06 |
| cg02293354 | 6 | HLA-DQA2 | 32711008 | rs2395261 | 6 | 32729335 | T | C | -0.237699 | 0.0639373 | 0.000201116 | -0.456598 | 0.0897503 | 3.64E-07 | 5 | 0.380131 | 9.52E-05 |
| cg07739876 | 6 | HLA-DQB2 | 32725377 | rs2856676 | 6 | 32656833 | G | A | 1.02804 | 0.167538 | 8.49E-10 | 1.02804 | 0.167538 | 8.49E-10 | 1 | 0.0163903 | 4.71E-07 |
| cg04418355 | 6 | HLA-DQB2 | 32729174 | rs204999 | 6 | 32109979 | G | A | 0.0370546 | 0.0279952 | 0.1856344 | -0.26973 | 0.0772402 | 0.000479342 | 13 | 2.89529 | 0.03567925 |
| cg20645912 | 6 | HLA-DQB2 | 32729274 | rs2395224 | 6 | 32590482 | G | C | 2.598 | 0.251825 | 6.05E-25 | 1.31482 | 0.336297 | 9.24E-05 | 1 | 0.00391558 | 0.009744892 |
| cg10714510 | 6 | HLA-DQB2 | 32729465 | rs2395224 | 6 | 32590482 | G | C | 1.01409 | 0.0982964 | 6.05E-25 | 0.527176 | 0.101088 | 1.84E-07 | 7 | 1.66165 | 5.30E-05 |
| cg21139325 | 6 | HLA-DQB2 | 32729470 | rs477515 | 6 | 32569691 | A | G | 0.783197 | 0.0944425 | 1.12E-16 | 0.477865 | 0.112245 | 2.07E-05 | 6 | 0.606555 | 0.002824872 |
| cg14441480 | 6 | HLA-DQB2 | 32729500 | rs2395224 | 6 | 32590482 | G | C | 0.989428 | 0.0959054 | 6.05E-25 | 0.579063 | 0.117127 | 7.67E-07 | 6 | 1.33316 | 0.000183906 |
| cg02964065 | 6 | HLA-DQB2 | 32729545 | rs2395224 | 6 | 32590482 | G | C | 0.821809 | 0.0796581 | 6.05E-25 | 0.532956 | 0.104816 | 3.69E-07 | 5 | 1.60159 | 9.65E-05 |
| cg15255946 | 6 | HLA-DQB2 | 32729563 | rs2395224 | 6 | 32590482 | G | C | 0.866738 | 0.084013 | 6.05E-25 | 0.472936 | 0.122487 | 0.000112914 | 6 | 1.81125 | 0.011498311 |
| cg18026055 | 6 | HLA-DQB2 | 32729596 | rs2395224 | 6 | 32590482 | G | C | 0.930932 | 0.0902354 | 6.05E-25 | 0.396946 | 0.0902671 | 1.10E-05 | 7 | 2.37148 | 0.001660308 |
| cg03638120 | 6 | HLA-DQB2 | 32729720 | rs2395224 | 6 | 32590482 | G | C | 1.14849 | 0.111323 | 6.05E-25 | 0.739378 | 0.185549 | 6.76E-05 | 4 | 0.668112 | 0.007441037 |
| cg17475271 | 6 | HLA-DQB2 | 32729741 | rs9276583 | 6 | 32729880 | G | A | -0.256919 | 0.0688483 | 0.000190278 | 0.514874 | 0.15079 | 0.000639063 | 5 | 1.1375 | 0.044530887 |
| cg23418102 | 6 | HLA-DQB2 | 32729847 | rs7768538 | 6 | 32729821 | C | A | -0.206455 | 0.0553252 | 0.000190278 | 0.423246 | 0.107288 | 7.99E-05 | 6 | 1.72984 | 0.008619066 |
| cg19939773 | 6 | HLA-DQB2 | 32729876 | rs2395224 | 6 | 32590482 | G | C | 1.04797 | 0.101579 | 6.05E-25 | 0.670785 | 0.150007 | 7.77E-06 | 4 | 0.823129 | 0.001272998 |
| cg15615586 | 6 | HLA-DQB2 | 32730040 | rs9276432 | 6 | 32712384 | T | C | 0.401405 | 0.108155 | 0.000206178 | 0.399099 | 0.090306 | 9.91E-06 | 2 | 0.0664218 | 0.001539641 |
| cg10298215 | 6 | HLA-DQB2 | 32730046 | rs2395224 | 6 | 32590482 | G | C | 2.30324 | 0.223254 | 6.05E-25 | 1.26073 | 0.281522 | 7.53E-06 | 2 | 0.197274 | 0.001246056 |
| cg07056079 | 6 | - | 32765314 | rs2857117 | 6 | 32778026 | T | C | 0.631155 | 0.063048 | 1.39E-23 | 0.663181 | 0.155581 | 2.02E-05 | 4 | 0.198555 | 0.002766285 |
| cg01423251 | 6 | - | 32765322 | rs2621332 | 6 | 32780317 | G | A | 0.32313 | 0.0807446 | 6.29E-05 | 0.32313 | 0.0807446 | 6.29E-05 | 1 | 0.0753499 | 0.007005331 |
| cg03639929 | 6 | - | 32765402 | rs2621332 | 6 | 32780317 | G | A | 0.173067 | 0.0432464 | 6.29E-05 | 0.191894 | 0.049867 | 0.000119076 | 3 | 0.350903 | 0.011997645 |
| cg03530983 | 6 | HLA-DOB | 32781171 | rs2157077 | 6 | 32785904 | T | G | -1.8234 | 0.273622 | 2.68E-11 | -1.21713 | 0.276107 | 1.04E-05 | 1 | 0.00640936 | 0.001601504 |
| cg03083146 | 6 | HLA-DOB | 32781235 | rs17213728 | 6 | 32781954 | G | A | -1.20281 | 0.154319 | 6.54E-15 | -1.20281 | 0.154319 | 6.54E-15 | 1 | 0.136823 | 9.22E-12 |
| cg22016094 | 6 | HLA-DOB | 32781261 | rs2199874 | 6 | 32769926 | G | A | -0.808569 | 0.0849344 | 1.76E-21 | -0.721594 | 0.118388 | 1.10E-09 | 2 | 0.130635 | 6.03E-07 |
| cg09889987 | 6 | HLA-DOB | 32782136 | rs4148876 | 6 | 32796793 | A | G | 0.846122 | 0.144089 | 4.31E-09 | 0.906342 | 0.143687 | 2.84E-10 | 3 | 0.100717 | 1.85E-07 |
| cg10294956 | 6 | HLA-DOB | 32782845 | rs241443 | 6 | 32797115 | G | T | -1.43795 | 0.173168 | 1.02E-16 | -0.653925 | 0.170956 | 0.000130764 | 1 | 0.0192841 | 0.012816839 |
| cg00409309 | 6 | HLA-DOB | 32783551 | rs17034 | 6 | 32796521 | T | C | -0.805049 | 0.20422 | 8.08E-05 | -0.805049 | 0.20422 | 8.08E-05 | 1 | 0.0135209 | 0.008690751 |
| cg04576021 | 6 | HLA-DOB | 32784255 | rs5024431 | 6 | 32684344 | A | G | 1.33809 | 0.203873 | 5.29E-11 | 1.33809 | 0.203873 | 5.29E-11 | 1 | 0.0139025 | 4.27E-08 |
| cg01530082 | 6 | HLA-DOB | 32784327 | rs2621364 | 6 | 32769204 | A | G | -1.92474 | 0.192323 | 1.44E-23 | -0.785475 | 0.204092 | 0.000118822 | 1 | 0.0136748 | 0.011979478 |
| cg21021279 | 6 | TAP2 | 32789916 | rs2621323 | 6 | 32788707 | G | A | -1.17906 | 0.141979 | 1.01E-16 | -1.17906 | 0.141979 | 1.01E-16 | 1 | 0.0248845 | 2.32E-13 |
| cg25798341 | 6 | TAP2 | 32790506 | rs73410775 | 6 | 32789742 | C | T | -0.875668 | 0.0946541 | 2.25E-20 | -0.875668 | 0.0946541 | 2.25E-20 | 1 | 0.201115 | 7.17E-17 |
| cg22619784 | 6 | TAP2 | 32793355 | rs2621323 | 6 | 32788707 | G | A | -1.0988 | 0.132315 | 1.01E-16 | -1.0988 | 0.132315 | 1.01E-16 | 1 | 0.0286647 | 2.32E-13 |
| cg25823314 | 6 | TAP2 | 32794492 | rs241453 | 6 | 32796226 | A | G | -0.278948 | 0.0738464 | 0.000158516 | -0.278948 | 0.0738464 | 0.000158516 | 1 | 0.10564 | 0.014932134 |
| cg18243910 | 6 | TAP2 | 32795153 | rs17034 | 6 | 32796521 | T | C | -0.90739 | 0.230181 | 8.08E-05 | -0.90739 | 0.230181 | 8.08E-05 | 1 | 0.0106203 | 0.008690751 |
| cg13991568 | 6 | TAP2 | 32795282 | rs241453 | 6 | 32796226 | A | G | -0.694416 | 0.183834 | 0.000158516 | -0.694416 | 0.183834 | 0.000158516 | 1 | 0.0169521 | 0.014932134 |
| cg27533873 | 6 | TAP2 | 32795388 | rs2857101 | 6 | 32794676 | C | T | -0.521081 | 0.136227 | 0.000130764 | -0.521081 | 0.136227 | 0.000130764 | 1 | 0.0304313 | 0.012816839 |
| cg26187287 | 6 | TAP2 | 32795393 | rs241447 | 6 | 32796751 | C | T | -0.348042 | 0.089267 | 9.67E-05 | -0.291144 | 0.0862649 | 0.000738259 | 2 | 0.132752 | 0.049723412 |
| cg06121167 | 6 | TAP2 | 32796547 | rs2071545 | 6 | 32796058 | T | C | 0.962158 | 0.249072 | 0.000112061 | 0.962158 | 0.249072 | 0.000112061 | 1 | 0.00911396 | 0.011433013 |
| cg11752829 | 6 | TAP2 | 32797232 | rs241441 | 6 | 32797297 | C | T | 0.684856 | 0.178191 | 0.000121393 | 0.684856 | 0.178191 | 0.000121393 | 1 | 0.0179866 | 0.012178737 |
| cg20366633 | 6 | TAP2 | 32797234 | rs241441 | 6 | 32797297 | C | T | 0.632881 | 0.164668 | 0.000121393 | 0.727431 | 0.187593 | 0.000105486 | 2 | 0.026364 | 0.010934139 |
| cg26070383 | 6 | TAP2 | 32797241 | rs241453 | 6 | 32796226 | A | G | 0.477379 | 0.126377 | 0.000158516 | 0.458236 | 0.118957 | 0.000117144 | 2 | 0.0400867 | 0.011858035 |
| cg14812313 | 6 | TAP2 | 32797268 | rs241440 | 6 | 32797361 | T | C | 0.48458 | 0.125742 | 0.000116362 | 0.605955 | 0.154284 | 8.59E-05 | 2 | 0.0661928 | 0.009150586 |
| cg09187413 | 6 | TAP2 | 32800591 | rs75301392 | 6 | 32904051 | T | C | -1.45818 | 0.388019 | 0.000171328 | -1.45818 | 0.388019 | 0.000171328 | 1 | 0.0098521 | 0.015912132 |
| cg25139471 | 6 | TAP2 | 32802924 | rs241427 | 6 | 32804414 | A | G | 1.10302 | 0.29779 | 0.000212271 | 1.10302 | 0.29779 | 0.000212271 | 1 | 0.0059169 | 0.018949184 |
| cg10627913 | 6 | TAP2 | 32804435 | rs3819716 | 6 | 32804284 | G | A | -1.15371 | 0.233596 | 7.87E-07 | -1.15371 | 0.233596 | 7.87E-07 | 1 | 0.00843627 | 0.000188116 |
| cg27618777 | 6 | TAP2 | 32804628 | rs241427 | 6 | 32804414 | A | G | -0.673549 | 0.181843 | 0.000212271 | -0.673549 | 0.181843 | 0.000212271 | 1 | 0.0160213 | 0.018949184 |
| cg04255770 | 6 | TAP2 | 32804677 | rs17583244 | 6 | 32804687 | C | T | 1.06919 | 0.202364 | 1.27E-07 | 1.06919 | 0.202364 | 1.27E-07 | 1 | 0.0563155 | 3.78E-05 |
| cg22798247 | 6 | TAP2 | 32807372 | rs4959098 | 6 | 32383256 | A | C | 1.56204 | 0.37271 | 2.78E-05 | 1.56204 | 0.37271 | 2.78E-05 | 1 | 0.00342674 | 0.003641545 |
| cg14493899 | 6 | TAP2 | 32807374 | rs9276821 | 6 | 32829304 | G | A | 0.556664 | 0.153175 | 0.000278943 | 0.556664 | 0.153175 | 0.000278943 | 1 | 0.0200742 | 0.023467264 |
| cg24031377 | 6 | PSMB8 | 32810026 | rs2071540 | 6 | 32812916 | T | C | -0.393179 | 0.112479 | 0.000473105 | -0.393179 | 0.112479 | 0.000473105 | 1 | 0.0371454 | 0.035279821 |
| cg06833431 | 6 | PSMB8 | 32810224 | rs72860338 | 6 | 32819854 | G | A | -1.06476 | 0.227262 | 2.80E-06 | -1.06476 | 0.227262 | 2.80E-06 | 1 | 0.0633933 | 0.000559391 |
| cg21593554 | 6 | PSMB8 | 32810258 | rs2127676 | 6 | 32849841 | C | G | 0.755912 | 0.21741 | 0.000507353 | 0.755912 | 0.21741 | 0.000507353 | 1 | 0.0100415 | 0.037454704 |
| cg00777968 | 6 | PSMB8 | 32811647 | rs2071542 | 6 | 32811645 | G | A | 0.818175 | 0.207621 | 8.13E-05 | 0.818175 | 0.207621 | 8.13E-05 | 1 | 0.0599422 | 0.008702903 |
| cg01702338 | 6 | PSMB8 | 32812571 | rs2071463 | 6 | 32812528 | T | C | 0.78827 | 0.209069 | 0.000163051 | 0.78827 | 0.209069 | 0.000163051 | 1 | 0.0203396 | 0.015305901 |
| cg16890093 | 6 | PSMB8 | 32813084 | rs113215190 | 6 | 32812801 | A | G | 1.16915 | 0.259374 | 6.56E-06 | 1.16915 | 0.259374 | 6.56E-06 | 1 | 0.0285439 | 0.00111884 |
| cg09154880 | 6 | TAP1 | 32813715 | rs113215190 | 6 | 32812801 | A | G | 0.35448 | 0.0786409 | 6.56E-06 | 0.35034 | 0.0601621 | 5.79E-09 | 3 | 0.485211 | 2.73E-06 |
| cg05480623 | 6 | TAP1 | 32815009 | rs11257 | 6 | 32813864 | A | C | -0.211722 | 0.0459536 | 4.08E-06 | -0.211722 | 0.0459536 | 4.08E-06 | 1 | 0.958965 | 0.000767107 |
| cg08351785 | 6 | TAP1 | 32815831 | rs9276821 | 6 | 32829304 | G | A | -0.537999 | 0.148039 | 0.000278943 | -0.537999 | 0.148039 | 0.000278943 | 1 | 0.0214966 | 0.023467264 |
| cg00240875 | 6 | TAP1 | 32817673 | rs12527715 | 6 | 32816998 | C | T | -0.517155 | 0.104351 | 7.21E-07 | -0.517155 | 0.104351 | 7.21E-07 | 1 | 0.0723771 | 0.000174199 |
| cg20357228 | 6 | TAP1 | 32817977 | rs1057141 | 6 | 32818774 | C | T | 1.34678 | 0.270841 | 6.62E-07 | 1.34678 | 0.270841 | 6.62E-07 | 1 | 0.010657 | 0.000161792 |
| cg17973694 | 6 | TAP1 | 32818212 | rs72854938 | 6 | 32811224 | T | A | 0.560412 | 0.125756 | 8.34E-06 | 0.560412 | 0.125756 | 8.34E-06 | 1 | 0.197062 | 0.001351433 |
| cg01673307 | 6 | TAP1 | 32819911 | rs2395269 | 6 | 32817774 | G | T | -0.31601 | 0.0676719 | 3.02E-06 | -0.297684 | 0.0816833 | 0.000268121 | 2 | 0.206904 | 0.022799513 |
| cg02181920 | 6 | TAP1 | 32820029 | rs2395269 | 6 | 32817774 | G | T | -0.492756 | 0.105521 | 3.02E-06 | -0.52083 | 0.101378 | 2.79E-07 | 2 | 0.0873114 | 7.55E-05 |
| cg06473288 | 6 | TAP1 | 32820102 | rs2395269 | 6 | 32817774 | G | T | -0.837073 | 0.179255 | 3.02E-06 | -0.837073 | 0.179255 | 3.02E-06 | 1 | 0.0279522 | 0.000588966 |
| cg17626301 | 6 | TAP1 | 32820201 | rs2395269 | 6 | 32817774 | G | T | -0.715273 | 0.153172 | 3.02E-06 | -0.715273 | 0.153172 | 3.02E-06 | 1 | 0.0383281 | 0.000588966 |
| cg10666909 | 6 | TAP1 | 32820249 | rs2395269 | 6 | 32817774 | G | T | -0.771633 | 0.165241 | 3.02E-06 | -0.771633 | 0.165241 | 3.02E-06 | 1 | 0.0329226 | 0.000588966 |
| cg08818207 | 6 | TAP1 | 32820355 | rs41561219 | 6 | 32816443 | T | C | 0.42731 | 0.0917475 | 3.20E-06 | 0.399923 | 0.0846335 | 2.30E-06 | 3 | 0.496346 | 0.000478026 |
| cg04773990 | 6 | TAP1 | 32820410 | rs36229526 | 6 | 32820656 | T | G | 0.818204 | 0.230083 | 0.000376456 | 0.818204 | 0.230083 | 0.000376456 | 1 | 0.0344489 | 0.029843457 |
| cg24154161 | 6 | TAP1 | 32820421 | rs55967815 | 6 | 32820799 | A | C | 0.967611 | 0.206544 | 2.81E-06 | 0.967611 | 0.206544 | 2.81E-06 | 1 | 0.0772902 | 0.000559391 |
| cg23880953 | 6 | PSMB9 | 32820546 | rs72860338 | 6 | 32819854 | G | A | 0.425044 | 0.0907208 | 2.80E-06 | 0.425044 | 0.0907208 | 2.80E-06 | 1 | 0.401474 | 0.000559391 |
| cg26700949 | 6 | PSMB9 | 32820553 | rs72860340 | 6 | 32820137 | T | C | 0.787082 | 0.164567 | 1.73E-06 | 0.787082 | 0.164567 | 1.73E-06 | 1 | 0.119911 | 0.000371773 |
| cg15926590 | 6 | PSMB9 | 32820577 | rs36229526 | 6 | 32820656 | T | G | 0.564261 | 0.158673 | 0.000376456 | 0.564261 | 0.158673 | 0.000376456 | 1 | 0.0727892 | 0.029843457 |
| cg18436324 | 6 | PSMB9 | 32820583 | rs72860329 | 6 | 32818505 | C | G | 1.2162 | 0.252754 | 1.50E-06 | 1.2162 | 0.252754 | 1.50E-06 | 1 | 0.0503447 | 0.00032819 |
| cg05412930 | 6 | PSMB9 | 32820586 | rs72860329 | 6 | 32818505 | C | G | 0.567746 | 0.117991 | 1.50E-06 | 0.567746 | 0.117991 | 1.50E-06 | 1 | 0.233301 | 0.00032819 |
| cg06634056 | 6 | PSMB9 | 32820608 | rs36229526 | 6 | 32820656 | T | G | 1.28997 | 0.362746 | 0.000376456 | 1.28997 | 0.362746 | 0.000376456 | 1 | 0.0136668 | 0.029843457 |
| cg13403689 | 6 | PSMB9 | 32820641 | rs72860329 | 6 | 32818505 | C | G | 0.288442 | 0.0599449 | 1.50E-06 | 0.269975 | 0.0560931 | 1.49E-06 | 3 | 1.03511 | 0.000327501 |
| cg22696542 | 6 | PSMB9 | 32820804 | rs184538763 | 6 | 32846213 | C | G | -0.985291 | 0.209136 | 2.47E-06 | -0.985291 | 0.209136 | 2.47E-06 | 1 | 0.0765077 | 0.000506144 |
| cg09968749 | 6 | PSMB9 | 32820966 | rs55967815 | 6 | 32820799 | A | C | -0.329807 | 0.0703997 | 2.81E-06 | -0.329807 | 0.0703997 | 2.81E-06 | 1 | 0.670057 | 0.000559391 |
| cg01170201 | 6 | PSMB9 | 32820976 | rs2071542 | 6 | 32811645 | G | A | -1.12531 | 0.285561 | 8.13E-05 | -1.12531 | 0.285561 | 8.13E-05 | 1 | 0.0314431 | 0.008702903 |
| cg14530528 | 6 | TAP1 | 32821814 | rs1871667 | 6 | 32834229 | G | A | -0.993447 | 0.279929 | 0.000386885 | -0.993447 | 0.279929 | 0.000386885 | 1 | 0.00564109 | 0.030402658 |
| cg16229954 | 6 | PSMB9 | 32825045 | rs9276832 | 6 | 32832400 | T | C | -0.701593 | 0.184312 | 0.000140971 | -0.701593 | 0.184312 | 0.000140971 | 1 | 0.0145252 | 0.013647417 |
| cg08209711 | 6 | PSMB9 | 32825499 | rs9276832 | 6 | 32832400 | T | C | -0.353666 | 0.0929099 | 0.000140971 | -0.353666 | 0.0929099 | 0.000140971 | 1 | 0.0574357 | 0.013647417 |
| cg02878284 | 6 | PSMB9 | 32825701 | rs9276832 | 6 | 32832400 | T | C | -0.957764 | 0.25161 | 0.000140971 | -0.957764 | 0.25161 | 0.000140971 | 1 | 0.00775097 | 0.013647417 |
| cg19994157 | 6 | PSMB9 | 32825852 | rs9276832 | 6 | 32832400 | T | C | -0.453127 | 0.119039 | 0.000140971 | -0.453127 | 0.119039 | 0.000140971 | 1 | 0.034952 | 0.013647417 |
| cg00045690 | 6 | PSMB9 | 32825897 | rs9276909 | 6 | 32850839 | T | C | -1.4827 | 0.269376 | 3.72E-08 | -1.4827 | 0.269376 | 3.72E-08 | 1 | 0.00766382 | 1.33E-05 |
| cg06812795 | 6 | - | 32829025 | rs1351383 | 6 | 32822269 | C | A | -0.378311 | 0.107598 | 0.000438232 | -0.378311 | 0.107598 | 0.000438232 | 1 | 0.0387177 | 0.033323134 |
| cg21712377 | 6 | - | 32829062 | rs2071477 | 6 | 32825348 | C | T | -0.567788 | 0.158379 | 0.000337165 | -0.567788 | 0.158379 | 0.000337165 | 1 | 0.0178457 | 0.027248376 |
| cg01948226 | 6 | - | 32829208 | rs9276821 | 6 | 32829304 | G | A | -0.840433 | 0.231258 | 0.000278943 | -0.840433 | 0.231258 | 0.000278943 | 1 | 0.00875881 | 0.023467264 |
| cg07950855 | 6 | PPP1R2P1 | 32845816 | rs9276903 | 6 | 32848998 | T | C | -0.495928 | 0.140427 | 0.000413173 | -0.495928 | 0.140427 | 0.000413173 | 1 | 0.024569 | 0.032079678 |
| cg22454474 | 6 | PPP1R2P1 | 32846947 | rs2018501 | 6 | 32856208 | T | C | -1.1653 | 0.31561 | 0.000222359 | -1.1653 | 0.31561 | 0.000222359 | 1 | 0.00456967 | 0.019623054 |
| cg14597281 | 6 | - | 32861863 | rs10046115 | 6 | 32855174 | G | A | -1.14547 | 0.330148 | 0.000521405 | -1.14547 | 0.330148 | 0.000521405 | 1 | 0.0110461 | 0.038132833 |
| cg09600925 | 6 | - | 32862317 | rs11969002 | 6 | 32859748 | A | G | 1.17993 | 0.34302 | 0.000582165 | 1.17993 | 0.34302 | 0.000582165 | 1 | 0.0102626 | 0.041303623 |
| cg21994357 | 6 | - | 32862319 | rs16871100 | 6 | 32862270 | C | A | 0.488156 | 0.139679 | 0.000474428 | 0.488156 | 0.139679 | 0.000474428 | 1 | 0.0628939 | 0.035345946 |
| cg19653946 | 6 | - | 32862620 | rs16871100 | 6 | 32862270 | C | A | -0.40224 | 0.115095 | 0.000474428 | -0.40224 | 0.115095 | 0.000474428 | 1 | 0.0927875 | 0.035345946 |
| cg13314222 | 6 | - | 32862734 | rs241409 | 6 | 32861920 | G | A | -1.14434 | 0.146309 | 5.27E-15 | -1.14434 | 0.146309 | 5.27E-15 | 1 | 0.0531736 | 7.63E-12 |
| cg23581252 | 6 | - | 32897912 | rs9501236 | 6 | 32892716 | G | C | 0.897667 | 0.200836 | 7.84E-06 | 0.897667 | 0.200836 | 7.84E-06 | 1 | 0.0581393 | 0.001278909 |
| cg01026383 | 6 | HLA-DMB | 32905012 | rs2395296 | 6 | 32911814 | A | G | -1.20154 | 0.307666 | 9.41E-05 | -1.20154 | 0.307666 | 9.41E-05 | 1 | 0.00541565 | 0.009915796 |
| cg04903089 | 6 | HLA-DMB | 32905190 | rs73409626 | 6 | 32943407 | T | A | -1.01298 | 0.267993 | 0.000156949 | -1.01298 | 0.267993 | 0.000156949 | 1 | 0.0213319 | 0.014889319 |
| cg10310595 | 6 | HLA-DMB | 32908567 | rs3918154 | 6 | 32943752 | G | A | -0.842008 | 0.238815 | 0.000422326 | -0.842008 | 0.238815 | 0.000422326 | 1 | 0.110946 | 0.032433107 |
| cg16236263 | 6 | HLA-DMB | 32908605 | rs73396800 | 6 | 32914726 | C | G | -0.425956 | 0.113519 | 0.000175275 | -0.520207 | 0.102522 | 3.90E-07 | 2 | 0.291849 | 0.000101807 |
| cg00575744 | 6 | HLA-DMB | 32908642 | rs75301392 | 6 | 32904051 | T | C | -0.400617 | 0.106604 | 0.000171328 | -0.548023 | 0.13387 | 4.25E-05 | 2 | 0.318418 | 0.005135127 |
| cg25247351 | 6 | HLA-DMB | 32908794 | rs59576053 | 6 | 32936120 | T | C | -0.527668 | 0.139298 | 0.00015189 | -0.527668 | 0.139298 | 0.00015189 | 1 | 0.081607 | 0.01451883 |
| cg15418419 | 6 | HLA-DMA | 32916606 | rs73409626 | 6 | 32943407 | T | A | -1.14552 | 0.303057 | 0.000156949 | -1.14552 | 0.303057 | 0.000156949 | 1 | 0.0166191 | 0.014889319 |
| cg22961241 | 6 | HLA-DMA | 32917502 | rs73396802 | 6 | 32915797 | T | C | -0.328686 | 0.087596 | 0.000175275 | -0.328686 | 0.087596 | 0.000175275 | 1 | 0.201517 | 0.016227902 |
| cg18031239 | 6 | HLA-DMA | 32918419 | rs73409626 | 6 | 32943407 | T | A | -0.855114 | 0.226227 | 0.000156949 | -0.855114 | 0.226227 | 0.000156949 | 1 | 0.0300509 | 0.014889319 |
| cg14851271 | 6 | HLA-DMA | 32919431 | rs204991 | 6 | 32161366 | C | T | -1.22001 | 0.329591 | 0.000214321 | -1.22001 | 0.329591 | 0.000214321 | 1 | 0.00647177 | 0.019059303 |
| cg14475758 | 6 | HLA-DMA | 32920880 | rs75301392 | 6 | 32904051 | T | C | -0.777312 | 0.206842 | 0.000171328 | -0.777312 | 0.206842 | 0.000171328 | 1 | 0.0353304 | 0.015912132 |
| cg17940902 | 6 | HLA-DMA | 32921233 | rs57651384 | 6 | 32923849 | A | G | -0.533069 | 0.141248 | 0.000160702 | -0.533069 | 0.141248 | 0.000160702 | 1 | 0.0772538 | 0.015111702 |
| cg00047147 | 6 | HLA-DMA | 32922346 | rs206775 | 6 | 32954634 | C | A | 1.82325 | 0.291689 | 4.10E-10 | 1.43682 | 0.328931 | 1.25E-05 | 1 | 0.00410437 | 0.001844874 |
| cg12033125 | 6 | - | 32933013 | rs73409626 | 6 | 32943407 | T | A | 0.511578 | 0.135342 | 0.000156949 | 0.511578 | 0.135342 | 0.000156949 | 1 | 0.0844728 | 0.014889319 |
| cg16517114 | 6 | BRD2 | 32937355 | rs7764491 | 6 | 33060840 | G | C | 1.19615 | 0.297754 | 5.89E-05 | 1.19615 | 0.297754 | 5.89E-05 | 1 | 0.0273427 | 0.006711238 |
| cg27237087 | 6 | BRD2 | 32938185 | rs142488396 | 6 | 32958703 | A | G | -1.50617 | 0.302607 | 6.46E-07 | -1.50617 | 0.302607 | 6.46E-07 | 1 | 0.032216 | 0.000158743 |
| cg21755381 | 6 | BRD2 | 32938280 | rs151719 | 6 | 32903900 | C | T | -0.123677 | 0.0339942 | 0.000274649 | -0.271374 | 0.0766223 | 0.000397625 | 11 | 1.1812 | 0.031110863 |
| cg04138346 | 6 | BRD2 | 32938946 | rs79643712 | 6 | 32938911 | T | C | -0.658315 | 0.139729 | 2.46E-06 | -0.658315 | 0.139729 | 2.46E-06 | 1 | 0.0840275 | 0.000506144 |
| cg25749212 | 6 | BRD2 | 32938950 | rs79643712 | 6 | 32938911 | T | C | -0.814802 | 0.172944 | 2.46E-06 | -0.814802 | 0.172944 | 2.46E-06 | 1 | 0.0547221 | 0.000506144 |
| cg01105943 | 6 | BRD2 | 32940865 | rs2855432 | 6 | 33140983 | A | G | -0.949842 | 0.180652 | 1.46E-07 | -0.949842 | 0.180652 | 1.46E-07 | 1 | 0.0174789 | 4.27E-05 |
| cg25158622 | 6 | BRD2 | 32942429 | rs516535 | 6 | 32942302 | G | A | -0.67044 | 0.102593 | 6.39E-11 | -0.67044 | 0.102593 | 6.39E-11 | 1 | 0.0450227 | 4.98E-08 |
| cg26953232 | 6 | BRD2 | 32942494 | rs516535 | 6 | 32942302 | G | A | -0.49697 | 0.0760479 | 6.39E-11 | -0.518906 | 0.0720204 | 5.85E-13 | 2 | 0.168278 | 5.92E-10 |
| cg27395200 | 6 | BRD2 | 32942710 | rs516535 | 6 | 32942302 | G | A | -0.837692 | 0.128186 | 6.39E-11 | -0.837692 | 0.128186 | 6.39E-11 | 1 | 0.0288088 | 4.98E-08 |
| cg07275218 | 6 | BRD2 | 32942714 | rs516535 | 6 | 32942302 | G | A | -0.987024 | 0.151038 | 6.39E-11 | -0.987024 | 0.151038 | 6.39E-11 | 1 | 0.0207273 | 4.98E-08 |
| cg02471378 | 6 | BRD2 | 32943025 | rs496160 | 6 | 32956787 | T | C | -0.331863 | 0.0545957 | 1.22E-09 | -0.281056 | 0.0742691 | 0.000154195 | 6 | 0.49037 | 0.014704508 |
| cg01961387 | 6 | BRD2 | 32944195 | rs184054 | 6 | 32949962 | T | G | -1.30404 | 0.205542 | 2.24E-10 | -1.30404 | 0.205542 | 2.24E-10 | 1 | 0.0113576 | 1.48E-07 |
| cg11936639 | 6 | BRD2 | 32944495 | rs206775 | 6 | 32954634 | C | A | -1.0393 | 0.166269 | 4.10E-10 | -1.0393 | 0.166269 | 4.10E-10 | 1 | 0.0172569 | 2.51E-07 |
| cg26246342 | 6 | BRD2 | 32945423 | rs206776 | 6 | 32953711 | T | C | -1.0149 | 0.22991 | 1.01E-05 | -1.0149 | 0.22991 | 1.01E-05 | 1 | 0.00999191 | 0.001565644 |
| cg18888137 | 6 | BRD2 | 32945759 | rs188245 | 6 | 32955976 | G | A | -0.799167 | 0.182954 | 1.25E-05 | -0.799167 | 0.182954 | 1.25E-05 | 1 | 0.0135234 | 0.001844874 |
| cg02707277 | 6 | BRD2 | 32945906 | rs206775 | 6 | 32954634 | C | A | -0.947648 | 0.151607 | 4.10E-10 | -0.947648 | 0.151607 | 4.10E-10 | 1 | 0.020777 | 2.51E-07 |
| cg06898831 | 6 | BRD2 | 32946062 | rs206775 | 6 | 32954634 | C | A | -0.57217 | 0.0915371 | 4.10E-10 | -0.57217 | 0.0915371 | 4.10E-10 | 1 | 0.0571695 | 2.51E-07 |
| cg09566131 | 6 | BRD2 | 32947792 | rs635688 | 6 | 32943151 | T | C | 1.4554 | 0.22271 | 6.39E-11 | 1.4554 | 0.22271 | 6.39E-11 | 1 | 0.00948268 | 4.98E-08 |
| cg04878644 | 6 | BRD2 | 32947885 | rs1431393 | 6 | 32923988 | A | G | 0.717688 | 0.188028 | 0.000135174 | 0.717688 | 0.188028 | 0.000135174 | 1 | 0.0405593 | 0.013193249 |
| cg02462443 | 6 | BRD2 | 32947897 | rs2071876 | 6 | 32948426 | T | C | 1.07798 | 0.28115 | 0.000126031 | 1.07798 | 0.28115 | 0.000126031 | 1 | 0.0176874 | 0.012542482 |
| cg01716683 | 6 | BRD2 | 32947913 | rs497058 | 6 | 32956720 | T | C | 1.25368 | 0.204569 | 8.91E-10 | 1.25368 | 0.204569 | 8.91E-10 | 1 | 0.0111432 | 4.93E-07 |
| cg15279832 | 6 | - | 32952243 | rs516535 | 6 | 32942302 | G | A | 0.746458 | 0.114225 | 6.39E-11 | 0.746458 | 0.114225 | 6.39E-11 | 1 | 0.0363031 | 4.98E-08 |
| cg20713893 | 6 | - | 32952784 | rs206775 | 6 | 32954634 | C | A | 1.66575 | 0.266491 | 4.10E-10 | 1.52849 | 0.294513 | 2.11E-07 | 1 | 0.00517105 | 5.88E-05 |
| cg18030265 | 6 | HLA-DOA | 32975083 | rs408036 | 6 | 32974268 | C | T | -0.60922 | 0.113797 | 8.64E-08 | -0.630586 | 0.109443 | 8.35E-09 | 2 | 0.0375618 | 3.85E-06 |
| cg27193345 | 6 | HLA-DOA | 32975250 | rs453779 | 6 | 32975381 | A | G | 0.529251 | 0.0977832 | 6.23E-08 | 0.529251 | 0.0977832 | 6.23E-08 | 1 | 0.047406 | 2.08E-05 |
| cg16673446 | 6 | HLA-DOA | 32975925 | rs404557 | 6 | 32976927 | G | A | 0.443797 | 0.111034 | 6.42E-05 | 0.443797 | 0.111034 | 6.42E-05 | 1 | 0.280008 | 0.007118272 |
| cg07294785 | 6 | HLA-DOA | 32976018 | rs404557 | 6 | 32976927 | G | A | 1.09387 | 0.273675 | 6.42E-05 | 1.09387 | 0.273675 | 6.42E-05 | 1 | 0.0453897 | 0.007118272 |
| cg23220637 | 6 | HLA-DOA | 32976805 | rs3130603 | 6 | 32980608 | A | C | 0.388677 | 0.0650616 | 2.32E-09 | 0.392544 | 0.107892 | 0.00027449 | 3 | 0.495551 | 0.023200946 |
| cg16914277 | 6 | HLA-DOA | 32978053 | rs369150 | 6 | 32975720 | A | G | -1.03614 | 0.23404 | 9.55E-06 | -1.03614 | 0.23404 | 9.55E-06 | 1 | 0.0103991 | 0.00149942 |
| cg24476363 | 6 | HLA-DOA | 32978718 | rs447088 | 6 | 32979980 | C | A | 0.486947 | 0.112866 | 1.60E-05 | 0.486947 | 0.112866 | 1.60E-05 | 1 | 0.0467185 | 0.002283712 |
| cg05683739 | 6 | HLA-DOA | 32978775 | rs447088 | 6 | 32979980 | C | A | -0.38089 | 0.0882839 | 1.60E-05 | -0.38089 | 0.0882839 | 1.60E-05 | 1 | 0.0764774 | 0.002283712 |
| cg20069765 | 6 | HLA-DPA1 | 33036464 | rs111648287 | 6 | 33031414 | A | G | -1.32943 | 0.163991 | 5.26E-16 | -1.32943 | 0.163991 | 5.26E-16 | 1 | 0.0405025 | 1.09E-12 |
| cg08760402 | 6 | HLA-DPA1 | 33036486 | rs72879616 | 6 | 33037957 | A | G | -1.20901 | 0.159208 | 3.13E-14 | -1.20901 | 0.159208 | 3.13E-14 | 1 | 0.0323782 | 4.00E-11 |
| cg12168509 | 6 | HLA-DPA1 | 33036934 | rs34218937 | 6 | 33031689 | C | T | 0.817248 | 0.121432 | 1.71E-11 | 0.817248 | 0.121432 | 1.71E-11 | 1 | 0.0575929 | 1.47E-08 |
| cg22941409 | 6 | HLA-DPA1 | 33037496 | rs73739631 | 6 | 33034473 | G | A | -0.607627 | 0.085386 | 1.12E-12 | -0.607627 | 0.085386 | 1.12E-12 | 1 | 0.122128 | 1.06E-09 |
| cg02904996 | 6 | HLA-DPA1 | 33039412 | rs3129203 | 6 | 33127757 | T | C | -3.1473 | 0.193736 | 2.55E-59 | -1.26165 | 0.297378 | 2.21E-05 | 3 | 0.045444 | 0.002989589 |
| cg10921592 | 6 | HLA-DPA1 | 33039414 | rs3129278 | 6 | 33092412 | A | G | -2.46744 | 0.155117 | 5.99E-57 | -0.842475 | 0.162117 | 2.03E-07 | 3 | 0.0275775 | 5.69E-05 |
| cg00798281 | 6 | HLA-DPA1 | 33041697 | rs2567279 | 6 | 33046662 | C | T | -0.968123 | 0.201138 | 1.49E-06 | -0.968123 | 0.201138 | 1.49E-06 | 1 | 0.0164244 | 0.000327501 |
| cg15734436 | 6 | HLA-DPB1 | 33047185 | rs9277465 | 6 | 33053396 | G | A | -0.618687 | 0.0336648 | 2.11E-75 | -0.422003 | 0.12164 | 0.000521949 | 9 | 0.813307 | 0.038132833 |
| cg19404567 | 6 | HLA-DPB1 | 33049494 | rs2567289 | 6 | 33049565 | G | C | -0.54424 | 0.133845 | 4.78E-05 | -0.54424 | 0.133845 | 4.78E-05 | 1 | 0.0564562 | 0.005657383 |
| cg20100408 | 6 | HLA-DPB1 | 33050888 | rs2295118 | 6 | 33060892 | T | C | 0.811915 | 0.0504904 | 3.69E-58 | 0.912662 | 0.138897 | 5.03E-11 | 3 | 0.253137 | 4.10E-08 |
| cg04717959 | 6 | HLA-DPB1 | 33052111 | rs9277438 | 6 | 33052303 | T | C | -0.85403 | 0.0535805 | 3.57E-57 | -0.865081 | 0.052962 | 5.98E-60 | 2 | 0.184107 | 4.85E-55 |
| cg13921245 | 6 | HLA-DPB1 | 33053791 | rs3128968 | 6 | 33056253 | A | T | 0.590152 | 0.0320609 | 1.23E-75 | 0.52772 | 0.098643 | 8.82E-08 | 8 | 0.686677 | 2.79E-05 |
| cg24583871 | 6 | HLA-DPB1 | 33054001 | rs3129302 | 6 | 32974343 | T | C | 0.840171 | 0.194018 | 1.49E-05 | 0.835085 | 0.157063 | 1.06E-07 | 2 | 0.183471 | 3.25E-05 |
| cg09676013 | 6 | HLA-DPB2 | 33080500 | rs9277911 | 6 | 33124395 | C | G | 0.152093 | 0.040368 | 0.000164838 | 0.289715 | 0.0559157 | 2.21E-07 | 5 | 1.52716 | 6.14E-05 |
| cg25119261 | 6 | HLA-DPB2 | 33081351 | rs3129210 | 6 | 33122876 | A | G | 0.414 | 0.100984 | 4.14E-05 | 0.414 | 0.100984 | 4.14E-05 | 1 | 0.0443303 | 0.005053459 |
| cg03943025 | 6 | HLA-DPB2 | 33084549 | rs9277657 | 6 | 33084357 | C | T | -0.0987841 | 0.024791 | 6.76E-05 | -0.230897 | 0.045024 | 2.93E-07 | 12 | 3.29063 | 7.87E-05 |
| cg13524302 | 6 | HLA-DPB2 | 33084798 | rs9277828 | 6 | 33102547 | A | G | -0.129774 | 0.0349206 | 0.000202261 | -0.281919 | 0.0793477 | 0.000380996 | 9 | 1.7813 | 0.030129682 |
| cg27494597 | 6 | HLA-DPB2 | 33088820 | rs3117033 | 6 | 33088046 | T | C | -0.863451 | 0.0895606 | 5.46E-22 | -0.863451 | 0.0895606 | 5.46E-22 | 1 | 0.0571845 | 1.88E-18 |
| cg24938100 | 6 | HLA-DPB2 | 33091407 | rs3130224 | 6 | 33090509 | G | C | -1.06491 | 0.131966 | 7.13E-16 | -1.06491 | 0.131966 | 7.13E-16 | 1 | 0.0358384 | 1.41E-12 |
| cg08313040 | 6 | HLA-DPB2 | 33092243 | rs3129207 | 6 | 33125312 | C | G | 2.09422 | 0.229712 | 7.86E-20 | 1.3463 | 0.342811 | 8.60E-05 | 1 | 0.00395779 | 0.009150586 |
| cg13557804 | 6 | - | 33117976 | rs62405743 | 6 | 33191495 | C | T | 1.59845 | 0.342913 | 3.14E-06 | 1.59845 | 0.342913 | 3.14E-06 | 1 | 0.0103815 | 0.000609028 |
| cg26290219 | 6 | - | 33128906 | rs115161131 | 6 | 33127774 | A | C | -0.396337 | 0.0662662 | 2.23E-09 | -0.396337 | 0.0662662 | 2.23E-09 | 1 | 0.296473 | 1.13E-06 |
| cg16604233 | 6 | - | 33128923 | rs115161131 | 6 | 33127774 | A | C | -0.154199 | 0.0257816 | 2.23E-09 | -0.180813 | 0.0429347 | 2.54E-05 | 7 | 2.28049 | 0.003380933 |
| cg09347430 | 6 | - | 33129017 | rs2294477 | 6 | 33098988 | C | G | -0.651656 | 0.063154 | 5.94E-25 | -0.49866 | 0.138629 | 0.000321878 | 4 | 0.198063 | 0.026288109 |
| cg04804814 | 6 | - | 33129024 | rs115161131 | 6 | 33127774 | A | C | -0.449429 | 0.0751429 | 2.23E-09 | -0.449429 | 0.0751429 | 2.23E-09 | 1 | 0.230512 | 1.13E-06 |
| cg03731828 | 6 | - | 33129106 | rs115161131 | 6 | 33127774 | A | C | 0.368866 | 0.0616731 | 2.23E-09 | 0.378471 | 0.0608246 | 4.92E-10 | 2 | 0.351276 | 2.93E-07 |
| cg19935922 | 6 | - | 33129251 | rs115161131 | 6 | 33127774 | A | C | 0.862503 | 0.144207 | 2.23E-09 | 0.862503 | 0.144207 | 2.23E-09 | 1 | 0.0623915 | 1.13E-06 |
| cg08989818 | 6 | - | 33129317 | rs115161131 | 6 | 33127774 | A | C | 0.798544 | 0.133514 | 2.23E-09 | 0.798544 | 0.133514 | 2.23E-09 | 1 | 0.072831 | 1.13E-06 |
| cg12881453 | 6 | COL11A2 | 33131745 | rs9405002 | 6 | 33131893 | T | C | -0.905931 | 0.219981 | 3.82E-05 | -0.905931 | 0.219981 | 3.82E-05 | 1 | 0.0156471 | 0.004742219 |
| cg04464727 | 6 | COL11A2 | 33131769 | rs3129206 | 6 | 33125462 | C | T | -0.872012 | 0.0949751 | 4.32E-20 | -0.872012 | 0.0949751 | 4.32E-20 | 1 | 0.0515865 | 1.35E-16 |
| cg08077736 | 6 | COL11A2 | 33131831 | rs3130158 | 6 | 33119640 | T | C | -0.997387 | 0.155725 | 1.51E-10 | -0.997387 | 0.155725 | 1.51E-10 | 1 | 0.021857 | 1.07E-07 |
| cg14147420 | 6 | COL11A2 | 33132192 | rs17221541 | 6 | 33149379 | A | G | -1.18075 | 0.274965 | 1.75E-05 | -1.18075 | 0.274965 | 1.75E-05 | 1 | 0.0124159 | 0.002460727 |
| cg12945707 | 6 | COL11A2 | 33132241 | rs2855425 | 6 | 33144373 | G | A | -0.486621 | 0.0923601 | 1.38E-07 | -0.457764 | 0.0871665 | 1.51E-07 | 2 | 0.0817981 | 4.40E-05 |
| cg20506659 | 6 | COL11A2 | 33132943 | rs9277895 | 6 | 33115606 | G | A | 1.29873 | 0.202535 | 1.44E-10 | 1.29873 | 0.202535 | 1.44E-10 | 1 | 0.0130059 | 1.02E-07 |
| cg15047502 | 6 | COL11A2 | 33132996 | rs2855448 | 6 | 33136575 | C | T | -0.41797 | 0.069801 | 2.13E-09 | -0.41797 | 0.069801 | 2.13E-09 | 1 | 0.109052 | 1.10E-06 |
| cg17790159 | 6 | COL11A2 | 33133083 | rs9277841 | 6 | 33104672 | A | G | 0.64196 | 0.164991 | 9.99E-05 | 0.64196 | 0.164991 | 9.99E-05 | 1 | 0.0161931 | 0.010437092 |
| cg15081128 | 6 | COL11A2 | 33133752 | rs2855425 | 6 | 33144373 | G | A | -1.0233 | 0.194221 | 1.38E-07 | -1.0233 | 0.194221 | 1.38E-07 | 1 | 0.0151067 | 4.06E-05 |
| cg23945333 | 6 | COL11A2 | 33134078 | rs2855448 | 6 | 33136575 | C | T | -0.82801 | 0.138278 | 2.13E-09 | -0.82801 | 0.138278 | 2.13E-09 | 1 | 0.027721 | 1.10E-06 |
| cg11761176 | 6 | COL11A2 | 33135298 | rs2855450 | 6 | 33135391 | C | T | 1.54582 | 0.246809 | 3.79E-10 | 1.01805 | 0.261651 | 9.99E-05 | 1 | 0.00637939 | 0.010437092 |
| cg00933415 | 6 | COL11A2 | 33135453 | rs3129217 | 6 | 33116993 | C | T | 0.487201 | 0.0890495 | 4.48E-08 | 0.487201 | 0.0890495 | 4.48E-08 | 1 | 0.0741271 | 1.58E-05 |
| cg25482983 | 6 | COL11A2 | 33135756 | rs3129229 | 6 | 33112576 | T | C | -1.17351 | 0.148199 | 2.43E-15 | -1.17351 | 0.148199 | 2.43E-15 | 1 | 0.0284441 | 4.06E-12 |
| cg09344631 | 6 | COL11A2 | 33135763 | rs1799910 | 6 | 33139328 | T | C | -1.19959 | 0.30879 | 0.000102457 | -1.19959 | 0.30879 | 0.000102457 | 1 | 0.00472056 | 0.010674842 |
| cg14043298 | 6 | COL11A2 | 33136297 | rs73741546 | 6 | 33180655 | C | T | -0.369561 | 0.0729166 | 4.02E-07 | -0.369561 | 0.0729166 | 4.02E-07 | 1 | 0.656128 | 0.000104645 |
| cg02095334 | 6 | COL11A2 | 33138108 | rs73741524 | 6 | 33139184 | C | G | -0.598011 | 0.114899 | 1.95E-07 | -0.541014 | 0.153755 | 0.00043379 | 2 | 0.286541 | 0.033062889 |
| cg05636843 | 6 | COL11A2 | 33138669 | rs1799911 | 6 | 33138677 | A | G | 0.219143 | 0.033184 | 4.03E-11 | 0.265246 | 0.0745344 | 0.000372762 | 5 | 0.694393 | 0.029697405 |
| cg13189434 | 6 | COL11A2 | 33139083 | rs2855425 | 6 | 33144373 | G | A | -0.969812 | 0.184069 | 1.38E-07 | -0.969812 | 0.184069 | 1.38E-07 | 1 | 0.0168305 | 4.06E-05 |
| cg08241373 | 6 | COL11A2 | 33139529 | rs487652 | 6 | 33193701 | G | C | 0.927877 | 0.20489 | 5.94E-06 | 0.927877 | 0.20489 | 5.94E-06 | 1 | 0.0138952 | 0.001026909 |
| cg12300123 | 6 | COL11A2 | 33139539 | rs2855425 | 6 | 33144373 | G | A | 1.08535 | 0.205997 | 1.38E-07 | 1.08535 | 0.205997 | 1.38E-07 | 1 | 0.0134178 | 4.06E-05 |
| cg01320908 | 6 | COL11A2 | 33139810 | rs2229785 | 6 | 33141161 | A | G | -0.462751 | 0.0887814 | 1.87E-07 | -0.462751 | 0.0887814 | 1.87E-07 | 1 | 0.0739168 | 5.35E-05 |
| cg21696987 | 6 | COL11A2 | 33140459 | rs1799908 | 6 | 33144243 | A | T | 1.342 | 0.109232 | 1.12E-34 | 1.16364 | 0.102782 | 1.06E-29 | 2 | 0.0908342 | 9.51E-26 |
| cg21974506 | 6 | COL11A2 | 33141291 | rs2855430 | 6 | 33141280 | A | G | -0.365106 | 0.0248063 | 5.16E-49 | -0.476085 | 0.0966916 | 8.50E-07 | 10 | 1.8118 | 0.000202417 |
| cg00115458 | 6 | COL11A2 | 33141305 | rs2076312 | 6 | 33142162 | A | C | -0.436079 | 0.026838 | 2.42E-59 | -0.431167 | 0.057508 | 6.56E-14 | 9 | 1.32771 | 8.12E-11 |
| cg10211891 | 6 | COL11A2 | 33141687 | rs2855426 | 6 | 33143136 | A | G | -0.787464 | 0.0488229 | 1.69E-58 | -0.762205 | 0.106412 | 7.96E-13 | 3 | 0.340836 | 7.73E-10 |
| cg00866054 | 6 | COL11A2 | 33142284 | rs2855425 | 6 | 33144373 | G | A | -0.186613 | 0.035419 | 1.38E-07 | -0.194093 | 0.0408186 | 1.99E-06 | 2 | 0.472379 | 0.000419951 |
| cg20427378 | 6 | COL11A2 | 33143129 | rs2855426 | 6 | 33143136 | A | G | -0.779418 | 0.0483241 | 1.69E-58 | -0.802365 | 0.0778141 | 6.40E-25 | 4 | 0.340731 | 3.84E-21 |
| cg20980653 | 6 | COL11A2 | 33143760 | rs2076310 | 6 | 33166034 | G | A | 0.95854 | 0.0584352 | 1.91E-60 | 0.958319 | 0.0557874 | 4.12E-66 | 3 | 0.176873 | 6.68E-61 |
| cg27590742 | 6 | COL11A2 | 33144071 | rs1799907 | 6 | 33152835 | T | A | 1.49489 | 0.184695 | 5.84E-16 | 1.4269 | 0.216071 | 4.03E-11 | 1 | 0.0129346 | 3.33E-08 |
| cg27531878 | 6 | COL11A2 | 33144795 | rs2076311 | 6 | 33145369 | A | C | 0.85581 | 0.105477 | 4.96E-16 | 0.85581 | 0.105477 | 4.96E-16 | 1 | 0.0493876 | 1.05E-12 |
| cg14573803 | 6 | COL11A2 | 33144993 | rs2076311 | 6 | 33145369 | A | C | 0.640136 | 0.078896 | 4.96E-16 | 0.640136 | 0.078896 | 4.96E-16 | 1 | 0.0883391 | 1.05E-12 |
| cg14374923 | 6 | COL11A2 | 33145955 | rs2744507 | 6 | 33148878 | T | C | -0.945797 | 0.0642998 | 5.90E-49 | -0.958034 | 0.0831322 | 1.02E-30 | 2 | 0.201322 | 9.77E-27 |
| cg14683730 | 6 | COL11A2 | 33146120 | rs1799910 | 6 | 33139328 | T | C | -0.67036 | 0.17256 | 0.000102457 | -0.67036 | 0.17256 | 0.000102457 | 1 | 0.0152967 | 0.010674842 |
| cg04022112 | 6 | COL11A2 | 33146323 | rs2744507 | 6 | 33148878 | T | C | -0.885413 | 0.0601947 | 5.90E-49 | -0.88501 | 0.0580735 | 2.03E-52 | 3 | 0.249789 | 1.10E-47 |
| cg18375610 | 6 | COL11A2 | 33147188 | rs1799908 | 6 | 33144243 | A | T | 2.15733 | 0.175596 | 1.12E-34 | -0.909127 | 0.211712 | 1.75E-05 | 1 | 0.0210518 | 0.002460727 |
| cg21240420 | 6 | COL11A2 | 33148096 | rs2744507 | 6 | 33148878 | T | C | -1.62867 | 0.110725 | 5.90E-49 | -0.949417 | 0.117511 | 6.58E-16 | 1 | 0.045184 | 1.33E-12 |
| cg14466923 | 6 | COL11A2 | 33150736 | rs61742525 | 6 | 33072522 | A | G | -0.217236 | 0.0433875 | 5.54E-07 | -0.24753 | 0.0593055 | 3.00E-05 | 4 | 4.33281 | 0.003875157 |
| cg20631997 | 6 | COL11A2 | 33151512 | rs17221541 | 6 | 33149379 | A | G | 0.183328 | 0.0426923 | 1.75E-05 | 0.290002 | 0.0509608 | 1.27E-08 | 6 | 1.20411 | 5.29E-06 |
| cg13617209 | 6 | COL11A2 | 33151849 | rs17221541 | 6 | 33149379 | A | G | 0.343523 | 0.0799974 | 1.75E-05 | 0.343523 | 0.0799974 | 1.75E-05 | 1 | 0.148393 | 0.002460727 |
| cg03260211 | 6 | COL11A2 | 33151921 | rs17221541 | 6 | 33149379 | A | G | 0.414852 | 0.0966079 | 1.75E-05 | 0.414852 | 0.0966079 | 1.75E-05 | 1 | 0.101701 | 0.002460727 |
| cg09502339 | 6 | COL11A2 | 33152642 | rs116626305 | 6 | 33151672 | A | T | 0.830812 | 0.198298 | 2.79E-05 | 0.830812 | 0.198298 | 2.79E-05 | 1 | 0.0244354 | 0.003657514 |
| cg04692301 | 6 | COL11A2 | 33152695 | rs3129205 | 6 | 33125859 | T | G | -1.8249 | 0.213064 | 1.09E-17 | -1.05814 | 0.255177 | 3.37E-05 | 1 | 0.00686641 | 0.004261175 |
| cg17596257 | 6 | COL11A2 | 33153263 | rs17221541 | 6 | 33149379 | A | G | -0.752683 | 0.17528 | 1.75E-05 | -0.752683 | 0.17528 | 1.75E-05 | 1 | 0.0307825 | 0.002460727 |
| cg17556389 | 6 | COL11A2 | 33154621 | rs2744505 | 6 | 33153122 | G | C | -1.66602 | 0.113182 | 5.03E-49 | -1.29388 | 0.322161 | 5.92E-05 | 1 | 0.00425244 | 0.006734798 |
| cg23704085 | 6 | COL11A2 | 33156779 | rs3130213 | 6 | 33074707 | A | G | -0.337372 | 0.020945 | 2.39E-58 | -0.450634 | 0.105892 | 2.09E-05 | 9 | 1.84508 | 0.002844716 |
| cg04137133 | 6 | COL11A2 | 33157147 | rs114894582 | 6 | 33158020 | T | C | -0.756597 | 0.162461 | 3.21E-06 | -0.756597 | 0.162461 | 3.21E-06 | 1 | 0.0449098 | 0.00062034 |
| cg09708959 | 6 | COL11A2 | 33161107 | rs213214 | 6 | 33181997 | T | C | -1.0849 | 0.223659 | 1.23E-06 | -1.0849 | 0.223659 | 1.23E-06 | 1 | 0.0110677 | 0.000279351 |
| cg22320183 | 6 | COL11A2 | 33161577 | rs9277911 | 6 | 33124395 | C | G | 0.366966 | 0.097399 | 0.000164838 | 0.390832 | 0.0899283 | 1.39E-05 | 2 | 0.103332 | 0.002007978 |
| cg17560929 | 6 | COL11A2 | 33161589 | rs9277905 | 6 | 33121408 | A | C | 0.369724 | 0.09632 | 0.000123836 | 0.369724 | 0.09632 | 0.000123836 | 1 | 0.0955744 | 0.012369677 |
| cg11930353 | 6 | RXRB | 33162218 | rs114652844 | 6 | 33181321 | C | T | -0.658906 | 0.14133 | 3.13E-06 | -0.658906 | 0.14133 | 3.13E-06 | 1 | 0.060943 | 0.000608117 |
| cg06215670 | 6 | RXRB | 33162506 | rs2076311 | 6 | 33145369 | A | C | 0.977104 | 0.120427 | 4.96E-16 | 0.929167 | 0.112503 | 1.49E-16 | 2 | 0.0803891 | 3.25E-13 |
| cg23456739 | 6 | RXRB | 33163286 | rs1546877 | 6 | 33161262 | C | T | -1.39624 | 0.270558 | 2.47E-07 | -1.39624 | 0.270558 | 2.47E-07 | 1 | 0.00727329 | 6.75E-05 |
| cg02915381 | 6 | RXRB | 33163333 | rs2229785 | 6 | 33141161 | A | G | 1.57462 | 0.302099 | 1.87E-07 | 1.57462 | 0.302099 | 1.87E-07 | 1 | 0.00629189 | 5.35E-05 |
| cg26987634 | 6 | RXRB | 33163396 | rs1546877 | 6 | 33161262 | C | T | -1.43293 | 0.277667 | 2.47E-07 | -1.43293 | 0.277667 | 2.47E-07 | 1 | 0.0068993 | 6.75E-05 |
| cg20984170 | 6 | RXRB | 33164798 | rs2744511 | 6 | 33142990 | C | T | -1.3742 | 0.260829 | 1.38E-07 | -1.3742 | 0.260829 | 1.38E-07 | 1 | 0.00832927 | 4.06E-05 |
| cg16425713 | 6 | RXRB | 33165404 | rs114894582 | 6 | 33158020 | T | C | 1.00622 | 0.216062 | 3.21E-06 | 1.00622 | 0.216062 | 3.21E-06 | 1 | 0.0253061 | 0.00062034 |
| cg10302472 | 6 | RXRB | 33165899 | rs1977090 | 6 | 33185578 | T | C | 0.918849 | 0.20549 | 7.77E-06 | 0.918849 | 0.20549 | 7.77E-06 | 1 | 0.0290182 | 0.001272998 |
| cg14348706 | 6 | SLC39A7 | 33170405 | rs12197724 | 6 | 33519419 | G | A | -1.43403 | 0.354004 | 5.10E-05 | -1.43403 | 0.354004 | 5.10E-05 | 1 | 0.0450502 | 0.005936834 |
| cg11445939 | 6 | HSD17B8 | 33172028 | rs1977090 | 6 | 33185578 | T | C | 0.706815 | 0.158071 | 7.77E-06 | 0.706815 | 0.158071 | 7.77E-06 | 1 | 0.0491698 | 0.001272998 |
| cg11335171 | 6 | HSD17B8 | 33173333 | rs9277770 | 6 | 33098678 | T | G | -1.29491 | 0.199175 | 8.00E-11 | -1.29491 | 0.199175 | 8.00E-11 | 1 | 0.0126607 | 6.00E-08 |
| cg04262934 | 6 | HSD17B8 | 33173581 | rs9277828 | 6 | 33102547 | A | G | -0.692854 | 0.186439 | 0.000202261 | -0.692854 | 0.186439 | 0.000202261 | 1 | 0.0210935 | 0.018267416 |
| cg00640376 | 6 | HSD17B8 | 33173927 | rs2076310 | 6 | 33166034 | G | A | -0.834599 | 0.0508794 | 1.91E-60 | -0.706331 | 0.209358 | 0.000741498 | 3 | 0.265019 | 0.049838046 |
| cg26106778 | 6 | RING1 | 33175147 | rs439205 | 6 | 33173842 | A | G | -0.860697 | 0.0524853 | 2.06E-60 | -0.671042 | 0.144332 | 3.33E-06 | 7 | 0.280145 | 0.000640461 |
| cg16857104 | 6 | RING1 | 33179659 | rs9277936 | 6 | 33183248 | A | T | -0.937902 | 0.132932 | 1.73E-12 | -0.937902 | 0.132932 | 1.73E-12 | 1 | 0.036579 | 1.62E-09 |
| cg09332664 | 6 | RING1 | 33179755 | rs1799911 | 6 | 33138677 | A | G | -1.16282 | 0.176082 | 4.03E-11 | -1.16282 | 0.176082 | 4.03E-11 | 1 | 0.0195311 | 3.33E-08 |
| cg12721695 | 6 | RING1 | 33180415 | rs1977090 | 6 | 33185578 | T | C | 0.712502 | 0.159343 | 7.77E-06 | 0.712502 | 0.159343 | 7.77E-06 | 1 | 0.0483934 | 0.001272998 |
| cg04895387 | 6 | - | 33180930 | rs12526336 | 6 | 33154049 | A | G | 0.851275 | 0.181878 | 2.87E-06 | 0.851275 | 0.181878 | 2.87E-06 | 1 | 0.0356265 | 0.000567878 |
| cg07090273 | 6 | - | 33181011 | rs5030979 | 6 | 33162228 | T | A | 0.840004 | 0.182698 | 4.27E-06 | 0.840004 | 0.182698 | 4.27E-06 | 1 | 0.0355574 | 0.000795665 |
| cg27112525 | 6 | - | 33181014 | rs115879584 | 6 | 33152966 | C | A | 1.12042 | 0.244544 | 4.62E-06 | 1.12042 | 0.244544 | 4.62E-06 | 1 | 0.0197302 | 0.000846799 |
| cg10041635 | 6 | - | 33181021 | rs1567464 | 6 | 33182870 | A | G | 0.895106 | 0.1964 | 5.18E-06 | 0.895106 | 0.1964 | 5.18E-06 | 1 | 0.0315291 | 0.000926865 |
| cg02775469 | 6 | - | 33181031 | rs5030979 | 6 | 33162228 | T | A | 0.625864 | 0.136124 | 4.27E-06 | 0.625864 | 0.136124 | 4.27E-06 | 1 | 0.0642147 | 0.000795665 |
| cg14105835 | 6 | - | 33205458 | rs7759963 | 6 | 33406556 | G | A | -0.537824 | 0.117395 | 4.63E-06 | -0.537824 | 0.117395 | 4.63E-06 | 1 | 0.339564 | 0.00084725 |
| cg08014182 | 6 | RPS18 | 33241594 | rs415748 | 6 | 33238824 | G | A | 0.450564 | 0.155567 | 0.003776448 | 0.470052 | 0.130147 | 0.000304278 | 2 | 0.0463085 | 0.025142017 |
| cg04263436 | 6 | B3GALT4 | 33245467 | rs2239842 | 6 | 33261871 | G | A | 1.12673 | 0.196518 | 9.87E-09 | 1.12673 | 0.196518 | 9.87E-09 | 1 | 0.0127408 | 4.34E-06 |
| cg26270195 | 6 | B3GALT4 | 33245553 | rs2239842 | 6 | 33261871 | G | A | 1.00173 | 0.174716 | 9.87E-09 | 1.00173 | 0.174716 | 9.87E-09 | 1 | 0.0161382 | 4.34E-06 |
| cg00087898 | 6 | WDR46 | 33253643 | rs2239842 | 6 | 33261871 | G | A | 0.635087 | 0.110768 | 9.87E-09 | 0.635087 | 0.110768 | 9.87E-09 | 1 | 0.0402928 | 4.34E-06 |
| cg17227127 | 6 | WDR46 | 33254571 | rs1014779 | 6 | 33276466 | A | G | 0.356155 | 0.0920409 | 0.000109089 | 0.356155 | 0.0920409 | 0.000109089 | 1 | 0.0542017 | 0.011164918 |
| cg13054323 | 6 | WDR46 | 33254599 | rs1014779 | 6 | 33276466 | A | G | 0.745863 | 0.192753 | 0.000109089 | 0.745863 | 0.192753 | 0.000109089 | 1 | 0.0122899 | 0.011164918 |
| cg10629123 | 6 | WDR46 | 33254611 | rs2239842 | 6 | 33261871 | G | A | 1.04266 | 0.181854 | 9.87E-09 | 1.04266 | 0.181854 | 9.87E-09 | 1 | 0.014889 | 4.34E-06 |
| cg03426762 | 6 | WDR46 | 33255172 | rs1059288 | 6 | 33267672 | A | G | -0.344125 | 0.0772529 | 8.42E-06 | -0.344125 | 0.0772529 | 8.42E-06 | 1 | 0.0765646 | 0.001357464 |
| cg11958269 | 6 | WDR46 | 33255190 | rs2855426 | 6 | 33143136 | A | G | -0.676422 | 0.0419383 | 1.69E-58 | -0.663692 | 0.0783945 | 2.57E-17 | 5 | 0.517479 | 6.61E-14 |
| cg14578807 | 6 | WDR46 | 33255193 | rs1059288 | 6 | 33267672 | A | G | -0.446431 | 0.10022 | 8.42E-06 | -0.423347 | 0.0967947 | 1.22E-05 | 2 | 0.0594961 | 0.001813695 |
| cg12952190 | 6 | PFDN6 | 33256441 | rs211466 | 6 | 33326139 | A | G | 0.575532 | 0.122613 | 2.68E-06 | 0.575532 | 0.122613 | 2.68E-06 | 1 | 0.0788349 | 0.00054584 |
| cg16435820 | 6 | WDR46 | 33256958 | rs469064 | 6 | 33250476 | C | A | -0.731379 | 0.199667 | 0.000249346 | -0.731379 | 0.199667 | 0.000249346 | 1 | 0.0113911 | 0.021387916 |
| cg00578240 | 6 | WDR46 | 33257112 | rs211469 | 6 | 33323257 | A | G | 1.39915 | 0.29635 | 2.35E-06 | 1.39915 | 0.29635 | 2.35E-06 | 1 | 0.0131913 | 0.000485178 |
| cg23805884 | 6 | WDR46 | 33257135 | rs3106190 | 6 | 33280629 | G | C | -0.837882 | 0.22895 | 0.000252596 | -0.837882 | 0.22895 | 0.000252596 | 1 | 0.00853401 | 0.021609529 |
| cg21782712 | 6 | WDR46 | 33257137 | rs463260 | 6 | 33256984 | C | T | -0.735684 | 0.159243 | 3.84E-06 | -0.735684 | 0.159243 | 3.84E-06 | 1 | 0.0179329 | 0.000727529 |
| cg23120848 | 6 | WDR46 | 33257141 | rs2013891 | 6 | 33275872 | A | G | -0.544014 | 0.118486 | 4.41E-06 | -0.544014 | 0.118486 | 4.41E-06 | 1 | 0.0327838 | 0.000815732 |
| cg02845534 | 6 | PFDN6 | 33258581 | rs3135409 | 6 | 33274520 | A | C | 0.722327 | 0.157462 | 4.49E-06 | 0.722327 | 0.157462 | 4.49E-06 | 1 | 0.0185291 | 0.000827109 |
| cg15559584 | 6 | TAPBP | 33267644 | rs9277968 | 6 | 33270680 | A | G | -0.227589 | 0.0487218 | 3.00E-06 | -0.25628 | 0.0749124 | 0.000623857 | 3 | 0.248999 | 0.04368801 |
| cg04181556 | 6 | TAPBP | 33267702 | rs3106189 | 6 | 33282002 | T | C | 1.04296 | 0.283157 | 0.000230279 | 1.04296 | 0.283157 | 0.000230279 | 1 | 0.00554384 | 0.020190414 |
| cg00478442 | 6 | TAPBP | 33267761 | rs9277968 | 6 | 33270680 | A | G | -0.566703 | 0.121319 | 3.00E-06 | -0.566703 | 0.121319 | 3.00E-06 | 1 | 0.0311255 | 0.000588966 |
| cg27635422 | 6 | TAPBP | 33267886 | rs1059288 | 6 | 33267672 | A | G | -0.418051 | 0.0938487 | 8.42E-06 | -0.418051 | 0.0938487 | 8.42E-06 | 1 | 0.0518516 | 0.001357464 |
| cg16095772 | 6 | TAPBP | 33268176 | rs3130102 | 6 | 33292934 | G | A | -0.976399 | 0.224018 | 1.31E-05 | -0.976399 | 0.224018 | 1.31E-05 | 1 | 0.00916126 | 0.001904974 |
| cg03768171 | 6 | TAPBP | 33272880 | rs1014779 | 6 | 33276466 | A | G | 0.660449 | 0.17068 | 0.000109089 | 0.660449 | 0.17068 | 0.000109089 | 1 | 0.0156998 | 0.011164918 |
| cg15705563 | 6 | TAPBP | 33273014 | rs1014779 | 6 | 33276466 | A | G | -0.900383 | 0.232686 | 0.000109089 | -0.900383 | 0.232686 | 0.000109089 | 1 | 0.00840671 | 0.011164918 |
| cg02191909 | 6 | TAPBP | 33273716 | rs3117324 | 6 | 33324527 | G | T | 1.24248 | 0.327802 | 0.000150499 | 1.24248 | 0.327802 | 0.000150499 | 1 | 0.00418691 | 0.014411349 |
| cg08770771 | 6 | TAPBP | 33276448 | rs1014779 | 6 | 33276466 | A | G | -0.483921 | 0.125059 | 0.000109089 | -0.483921 | 0.125059 | 0.000109089 | 1 | 0.0293114 | 0.011164918 |
| cg20973878 | 6 | TAPBP | 33280713 | rs3106190 | 6 | 33280629 | G | C | 0.542485 | 0.148233 | 0.000252596 | 0.542485 | 0.148233 | 0.000252596 | 1 | 0.0204787 | 0.021609529 |
| cg07160118 | 6 | TAPBP | 33282418 | rs1059288 | 6 | 33267672 | A | G | 0.638688 | 0.14338 | 8.42E-06 | 0.638688 | 0.14338 | 8.42E-06 | 1 | 0.0221641 | 0.001357464 |
| cg14309283 | 6 | ZBTB22 | 33282890 | rs3106195 | 6 | 33301676 | A | T | 0.149935 | 0.0324634 | 3.87E-06 | 0.352893 | 0.0858113 | 3.92E-05 | 8 | 1.06329 | 0.004844183 |
| cg27168291 | 6 | ZBTB22 | 33282997 | rs3106195 | 6 | 33301676 | A | T | 0.139934 | 0.030298 | 3.87E-06 | 0.290067 | 0.0637047 | 5.29E-06 | 8 | 1.31519 | 0.000935129 |
| cg26646118 | 6 | ZBTB22 | 33283000 | rs3106195 | 6 | 33301676 | A | T | 0.151586 | 0.0328208 | 3.87E-06 | 0.271194 | 0.0727121 | 0.000191773 | 6 | 0.927846 | 0.017426978 |
| cg10134527 | 6 | ZBTB22 | 33283015 | rs3106195 | 6 | 33301676 | A | T | 0.14759 | 0.0319555 | 3.87E-06 | 0.312465 | 0.0816099 | 0.000128835 | 6 | 1.1111 | 0.012735615 |
| cg08771019 | 6 | ZBTB22 | 33283145 | rs3106195 | 6 | 33301676 | A | T | 0.152075 | 0.0329267 | 3.87E-06 | 0.252957 | 0.066582 | 0.000145226 | 6 | 0.765163 | 0.014005703 |
| cg04678230 | 6 | ZBTB22 | 33283189 | rs1061783 | 6 | 33282628 | C | T | 0.394592 | 0.088909 | 9.08E-06 | 0.394592 | 0.088909 | 9.08E-06 | 1 | 0.0575897 | 0.001434732 |
| cg14258935 | 6 | ZBTB22 | 33283286 | rs3130271 | 6 | 33310979 | G | A | 0.612507 | 0.130709 | 2.79E-06 | 0.612507 | 0.130709 | 2.79E-06 | 1 | 0.0270007 | 0.000559391 |
| cg01199618 | 6 | ZBTB22 | 33283293 | rs1061783 | 6 | 33282628 | C | T | 0.498691 | 0.112364 | 9.08E-06 | 0.498691 | 0.112364 | 9.08E-06 | 1 | 0.0360221 | 0.001434732 |
| cg24221373 | 6 | ZBTB22 | 33283314 | rs1061783 | 6 | 33282628 | C | T | 0.312776 | 0.0704742 | 9.08E-06 | 0.312776 | 0.0704742 | 9.08E-06 | 1 | 0.0917122 | 0.001434732 |
| cg20185718 | 6 | ZBTB22 | 33283317 | rs3106195 | 6 | 33301676 | A | T | 0.46903 | 0.101553 | 3.87E-06 | 0.458874 | 0.098377 | 3.10E-06 | 2 | 0.0475705 | 0.000602193 |
| cg27368379 | 6 | ZBTB22 | 33283328 | rs1061783 | 6 | 33282628 | C | T | 0.357032 | 0.080446 | 9.08E-06 | 0.357032 | 0.080446 | 9.08E-06 | 1 | 0.0703595 | 0.001434732 |
| cg24718275 | 6 | ZBTB22 | 33283770 | rs3130100 | 6 | 33283766 | T | C | -1.3595 | 0.2248 | 1.48E-09 | -1.3595 | 0.2248 | 1.48E-09 | 1 | 0.00899445 | 7.79E-07 |
| cg08421271 | 6 | ZBTB22 | 33284646 | rs3130018 | 6 | 33290402 | A | G | -0.658559 | 0.184822 | 0.000366442 | -0.658559 | 0.184822 | 0.000366442 | 1 | 0.0134044 | 0.029278682 |
| cg04319462 | 6 | ZBTB22 | 33284965 | rs9277908 | 6 | 33123245 | T | C | 1.5686 | 0.410852 | 0.000134624 | 1.5686 | 0.410852 | 0.000134624 | 1 | 0.0050939 | 0.013155389 |
| cg06477487 | 6 | ZBTB22 | 33286558 | rs1014779 | 6 | 33276466 | A | G | -0.675246 | 0.174504 | 0.000109089 | -0.675246 | 0.174504 | 0.000109089 | 1 | 0.0150155 | 0.011164918 |
| cg20618109 | 6 | DAXX | 33287199 | rs2051625 | 6 | 33287183 | C | T | 0.302023 | 0.0871698 | 0.00053079 | 0.302023 | 0.0871698 | 0.00053079 | 1 | 0.922683 | 0.038570207 |
| cg15583349 | 6 | DAXX | 33287809 | rs2894334 | 6 | 33298344 | A | C | 0.82587 | 0.18203 | 5.71E-06 | 0.82587 | 0.18203 | 5.71E-06 | 1 | 0.0139207 | 0.000992479 |
| cg07905975 | 6 | DAXX | 33288366 | rs464865 | 6 | 33257186 | A | G | 1.01233 | 0.219544 | 4.01E-06 | 1.01233 | 0.219544 | 4.01E-06 | 1 | 0.00939077 | 0.000755068 |
| cg24498636 | 6 | DAXX | 33288372 | rs3130101 | 6 | 33292888 | G | A | 0.569327 | 0.157384 | 0.000297602 | 0.569327 | 0.157384 | 0.000297602 | 1 | 0.0186327 | 0.024691025 |
| cg09864211 | 6 | DAXX | 33288800 | rs3135409 | 6 | 33274520 | A | C | 1.28631 | 0.280407 | 4.49E-06 | 1.28631 | 0.280407 | 4.49E-06 | 1 | 0.00578631 | 0.000827109 |
| cg07607074 | 6 | DAXX | 33289544 | rs2071889 | 6 | 33272712 | C | A | 0.901069 | 0.193644 | 3.27E-06 | 0.901069 | 0.193644 | 3.27E-06 | 1 | 0.0121489 | 0.000629896 |
| cg20552903 | 6 | DAXX | 33289678 | rs3135408 | 6 | 33275013 | T | C | 0.529661 | 0.115575 | 4.59E-06 | 0.529661 | 0.115575 | 4.59E-06 | 1 | 0.0344606 | 0.000843121 |
| cg00187059 | 6 | DAXX | 33289693 | rs3106195 | 6 | 33301676 | A | T | 0.322395 | 0.0698037 | 3.87E-06 | 0.322395 | 0.0698037 | 3.87E-06 | 1 | 0.0952508 | 0.000730783 |
| cg10285420 | 6 | DAXX | 33289719 | rs2071889 | 6 | 33272712 | C | A | 0.752585 | 0.161734 | 3.27E-06 | 0.752585 | 0.161734 | 3.27E-06 | 1 | 0.0174619 | 0.000629896 |
| cg09992055 | 6 | DAXX | 33290281 | rs469064 | 6 | 33250476 | C | A | 0.667301 | 0.182173 | 0.000249346 | 0.667301 | 0.182173 | 0.000249346 | 1 | 0.0136984 | 0.021387916 |
| cg27052777 | 6 | DAXX | 33290408 | rs469064 | 6 | 33250476 | C | A | 0.392676 | 0.107201 | 0.000249346 | 0.392676 | 0.107201 | 0.000249346 | 1 | 0.039765 | 0.021387916 |
| cg14910283 | 6 | DAXX | 33290421 | rs469064 | 6 | 33250476 | C | A | 0.465816 | 0.127168 | 0.000249346 | 0.465816 | 0.127168 | 0.000249346 | 1 | 0.0282181 | 0.021387916 |
| cg17403520 | 6 | KIFC1 | 33359638 | rs12664430 | 6 | 33272677 | T | C | 1.35683 | 0.378266 | 0.000334606 | 1.35683 | 0.378266 | 0.000334606 | 1 | 0.0139125 | 0.027110418 |
| cg04757012 | 6 | KIFC1 | 33359817 | rs406009 | 6 | 33353090 | A | G | 0.714928 | 0.144211 | 7.15E-07 | 0.714928 | 0.144211 | 7.15E-07 | 1 | 0.0576259 | 0.000173548 |
| cg19916922 | 6 | KIFC1 | 33359833 | rs211469 | 6 | 33323257 | A | G | 0.381237 | 0.0807485 | 2.35E-06 | 0.381237 | 0.0807485 | 2.35E-06 | 1 | 0.180573 | 0.000485178 |
| cg05578398 | 6 | KIFC1 | 33359842 | rs211472 | 6 | 33321909 | C | T | -1.17236 | 0.248093 | 2.30E-06 | -1.17236 | 0.248093 | 2.30E-06 | 1 | 0.0191497 | 0.000478026 |
| cg09040034 | 6 | KIFC1 | 33362567 | rs76851963 | 6 | 33483043 | T | C | -0.502002 | 0.112224 | 7.71E-06 | -0.502002 | 0.112224 | 7.71E-06 | 1 | 0.48692 | 0.001269361 |
| cg12052754 | 6 | KIFC1 | 33376867 | rs2855426 | 6 | 33143136 | A | G | -1.43228 | 0.0888014 | 1.69E-58 | -1.13917 | 0.143863 | 2.43E-15 | 1 | 0.0301847 | 4.06E-12 |
| cg07857404 | 6 | PHF1 | 33378502 | rs211469 | 6 | 33323257 | A | G | 0.705646 | 0.149461 | 2.35E-06 | 0.705646 | 0.149461 | 2.35E-06 | 1 | 0.0525403 | 0.000485178 |
| cg03876174 | 6 | PHF1 | 33378508 | rs211466 | 6 | 33326139 | A | G | 0.897288 | 0.19116 | 2.68E-06 | 0.897288 | 0.19116 | 2.68E-06 | 1 | 0.0323131 | 0.00054584 |
| cg09459982 | 6 | CUTA | 33386556 | rs6942045 | 6 | 33351696 | T | C | -0.86748 | 0.242154 | 0.000340593 | -0.86748 | 0.242154 | 0.000340593 | 1 | 0.0100871 | 0.02747058 |
| cg25767433 | 6 | CUTA | 33386985 | rs9394145 | 6 | 33399778 | T | C | -0.511379 | 0.133599 | 0.000129382 | -0.511379 | 0.133599 | 0.000129382 | 1 | 0.0327831 | 0.012766285 |
| cg01320573 | 6 | CUTA | 33387003 | rs10807124 | 6 | 33404064 | A | G | -0.655323 | 0.171279 | 0.000130258 | -0.655323 | 0.171279 | 0.000130258 | 1 | 0.0199531 | 0.01278268 |
| cg18352916 | 6 | CUTA | 33387089 | rs9278029 | 6 | 33341424 | C | A | -1.05751 | 0.295806 | 0.000350315 | -1.05751 | 0.295806 | 0.000350315 | 1 | 0.0067048 | 0.028184656 |
| cg15587013 | 6 | SYNGAP1 | 33394838 | rs10807124 | 6 | 33404064 | A | G | -0.558837 | 0.146061 | 0.000130258 | -0.558837 | 0.146061 | 0.000130258 | 1 | 0.0274751 | 0.01278268 |
| cg14425347 | 6 | SYNGAP1 | 33395005 | rs10807124 | 6 | 33404064 | A | G | -0.499904 | 0.130658 | 0.000130258 | -0.499904 | 0.130658 | 0.000130258 | 1 | 0.0343597 | 0.01278268 |
| cg10144493 | 6 | SYNGAP1 | 33395133 | rs10807124 | 6 | 33404064 | A | G | -0.306346 | 0.0800683 | 0.000130258 | -0.326437 | 0.0764292 | 1.95E-05 | 2 | 0.0990556 | 0.00268325 |
| cg04802302 | 6 | SYNGAP1 | 33395290 | rs9368760 | 6 | 33356985 | T | C | -0.915649 | 0.253131 | 0.000297777 | -0.915649 | 0.253131 | 0.000297777 | 1 | 0.0090509 | 0.024692981 |
| cg24852032 | 6 | SYNGAP1 | 33396223 | rs3119025 | 6 | 33422976 | T | G | -0.3433 | 0.0819744 | 2.82E-05 | -0.360163 | 0.0734119 | 9.31E-07 | 2 | 0.289271 | 0.000219286 |
| cg18466911 | 6 | SYNGAP1 | 33396263 | rs449978 | 6 | 33496060 | G | A | -0.868382 | 0.201985 | 1.72E-05 | -0.868382 | 0.201985 | 1.72E-05 | 1 | 0.0419224 | 0.002419503 |
| cg06681810 | 6 | SYNGAP1 | 33396295 | rs1755040 | 6 | 33495175 | A | C | -0.22184 | 0.0514812 | 1.64E-05 | -0.218257 | 0.0510706 | 1.92E-05 | 2 | 0.65485 | 0.002675656 |
| cg21790305 | 6 | SYNGAP1 | 33396387 | rs4713634 | 6 | 33514708 | T | C | -0.829978 | 0.196689 | 2.45E-05 | -0.829978 | 0.196689 | 2.45E-05 | 1 | 0.0436273 | 0.003281776 |
| cg25813235 | 6 | SYNGAP1 | 33397883 | rs9394145 | 6 | 33399778 | T | C | -0.74903 | 0.195686 | 0.000129382 | -0.74903 | 0.195686 | 0.000129382 | 1 | 0.0152248 | 0.012766285 |
| cg26888941 | 6 | SYNGAP1 | 33398522 | rs10807124 | 6 | 33404064 | A | G | -0.429828 | 0.112342 | 0.000130258 | -0.429828 | 0.112342 | 0.000130258 | 1 | 0.0465112 | 0.01278268 |
| cg20201143 | 6 | SYNGAP1 | 33398533 | rs9394145 | 6 | 33399778 | T | C | -0.283608 | 0.0740933 | 0.000129382 | -0.224777 | 0.0648053 | 0.000523474 | 3 | 0.179194 | 0.038227072 |
| cg20445774 | 6 | SYNGAP1 | 33400021 | rs391500 | 6 | 33367133 | A | C | 1.03978 | 0.288503 | 0.000313371 | 1.03978 | 0.288503 | 0.000313371 | 1 | 0.00691883 | 0.025683939 |
| cg09572125 | 6 | SYNGAP1 | 33400477 | rs9394145 | 6 | 33399778 | T | C | -0.611826 | 0.159841 | 0.000129382 | -0.611826 | 0.159841 | 0.000129382 | 1 | 0.0228764 | 0.012766285 |
| cg20118717 | 6 | SYNGAP1 | 33400505 | rs10807124 | 6 | 33404064 | A | G | -0.514065 | 0.134359 | 0.000130258 | -0.514065 | 0.134359 | 0.000130258 | 1 | 0.0324874 | 0.01278268 |
| cg24571227 | 6 | SYNGAP1 | 33419573 | rs10807124 | 6 | 33404064 | A | G | -1.07843 | 0.281864 | 0.000130258 | -1.07843 | 0.281864 | 0.000130258 | 1 | 0.00728918 | 0.01278268 |
| cg06580074 | 6 | SYNGAP1 | 33420208 | rs10807124 | 6 | 33404064 | A | G | -0.482582 | 0.12613 | 0.000130258 | -0.482582 | 0.12613 | 0.000130258 | 1 | 0.0368827 | 0.01278268 |
| cg11586890 | 6 | SYNGAP1 | 33420227 | rs10807124 | 6 | 33404064 | A | G | -0.453155 | 0.118439 | 0.000130258 | -0.453155 | 0.118439 | 0.000130258 | 1 | 0.041841 | 0.01278268 |
| cg03945003 | 6 | ZBTB9 | 33423747 | rs114993678 | 6 | 33388894 | G | C | -1.05202 | 0.263337 | 6.47E-05 | -1.05202 | 0.263337 | 6.47E-05 | 1 | 0.0288734 | 0.007148563 |
| cg00700324 | 6 | BAK1 | 33548127 | rs210142 | 6 | 33546837 | T | C | 0.651865 | 0.162506 | 6.04E-05 | 0.651865 | 0.162506 | 6.04E-05 | 1 | 0.020693 | 0.006836126 |
| cg01035815 | 6 | ITPR3 | 33600828 | rs59929559 | 6 | 33588351 | A | G | -0.113137 | 0.0403109 | 0.005006606 | -0.131228 | 0.0335508 | 9.18E-05 | 8 | 1.27464 | 0.00970399 |
| cg05235151 | 6 | TCP11 | 35108114 | rs34500566 | 6 | 35067106 | T | G | -0.362092 | 0.102798 | 0.000427799 | -0.362092 | 0.102798 | 0.000427799 | 1 | 0.0775295 | 0.032775713 |
| cg24623244 | 6 | TCP11 | 35109398 | rs3756856 | 6 | 35110705 | G | A | 0.967217 | 0.281558 | 0.000592139 | 0.967217 | 0.281558 | 0.000592139 | 1 | 0.0101484 | 0.041937904 |
| cg12090052 | 6 | TCP11 | 35109435 | rs3756856 | 6 | 35110705 | G | A | 0.509408 | 0.148289 | 0.000592139 | 0.509408 | 0.148289 | 0.000592139 | 1 | 0.0369711 | 0.041937904 |
| cg20598034 | 6 | - | 36592246 | rs10807172 | 6 | 36667883 | C | G | -1.5402 | 0.417161 | 0.000222476 | -1.5402 | 0.417161 | 0.000222476 | 1 | 0.00259765 | 0.019623054 |
| cg18964319 | 6 | - | 36665554 | rs6928344 | 6 | 36667365 | C | T | 0.659673 | 0.180006 | 0.000247661 | 0.659673 | 0.180006 | 0.000247661 | 1 | 0.0144072 | 0.021311063 |
| cg12926693 | 6 | - | 36665611 | rs6928344 | 6 | 36667365 | C | T | 0.537566 | 0.146686 | 0.000247661 | 0.537566 | 0.146686 | 0.000247661 | 1 | 0.0217346 | 0.021311063 |
| cg08956463 | 6 | TREML2 | 41168911 | rs742493 | 6 | 40998167 | C | T | -0.973864 | 0.260918 | 0.000189684 | -0.882122 | 0.227236 | 0.00010366 | 2 | 0.0263256 | 0.010786254 |
| cg19005210 | 6 | TREML2 | 41168960 | rs2395754 | 6 | 41027520 | T | C | -0.581221 | 0.216675 | 0.007308404 | -0.595959 | 0.168715 | 0.000411972 | 2 | 0.0678267 | 0.032001787 |
| cg15658306 | 6 | TREML2 | 41168972 | rs79123612 | 6 | 41036111 | T | C | -0.910819 | 0.255688 | 0.000367795 | -0.745607 | 0.207905 | 0.000335494 | 2 | 0.035003 | 0.027167457 |
| cg25190634 | 6 | IRAK1BP1 | 79576994 | rs3902856 | 6 | 79699837 | T | C | -1.08531 | 0.290884 | 0.000190709 | -1.08531 | 0.290884 | 0.000190709 | 1 | 0.00579181 | 0.017378942 |
| cg01414830 | 6 | IRAK1BP1 | 79577007 | rs9343861 | 6 | 79744868 | A | C | -0.542184 | 0.142523 | 0.000142327 | -0.542184 | 0.142523 | 0.000142327 | 1 | 0.024325 | 0.013750662 |
| cg01428071 | 6 | PHIP | 79785773 | rs2063123 | 6 | 79658535 | C | T | -0.742089 | 0.191639 | 0.000107844 | -0.742089 | 0.191639 | 0.000107844 | 1 | 0.0133293 | 0.01111462 |
| cg24881834 | 6 | ME1 | 84140997 | rs7770178 | 6 | 84137722 | T | C | -0.188555 | 0.0845662 | 0.02576945 | -0.268711 | 0.0793674 | 0.000710161 | 2 | 0.547105 | 0.048373826 |
| cg16155724 | 6 | FYN | 112102807 | rs1887315 | 6 | 112151444 | G | C | -0.464722 | 0.12759 | 0.000270274 | -0.464722 | 0.12759 | 0.000270274 | 1 | 0.0632455 | 0.022892343 |
| cg24824472 | 6 | FYN | 112111043 | rs1887315 | 6 | 112151444 | G | C | -0.286581 | 0.0786811 | 0.000270274 | -0.286581 | 0.0786811 | 0.000270274 | 1 | 0.166578 | 0.022892343 |
| cg17076443 | 6 | FYN | 112115190 | rs1887315 | 6 | 112151444 | G | C | -0.491909 | 0.135054 | 0.000270274 | -0.491909 | 0.135054 | 0.000270274 | 1 | 0.05643 | 0.022892343 |
| cg04657000 | 6 | FYN | 112115430 | rs1887315 | 6 | 112151444 | G | C | -0.383706 | 0.105347 | 0.000270274 | -0.383706 | 0.105347 | 0.000270274 | 1 | 0.0928398 | 0.022892343 |
| cg04637264 | 6 | - | 112359355 | rs1887315 | 6 | 112151444 | G | C | -0.481242 | 0.132126 | 0.000270274 | -0.481242 | 0.132126 | 0.000270274 | 1 | 0.0589664 | 0.022892343 |
| cg01838965 | 6 | - | 127396950 | rs7741021 | 6 | 127468274 | C | A | -1.04473 | 0.302285 | 0.000548166 | -1.04473 | 0.302285 | 0.000548166 | 1 | 0.00527878 | 0.039478889 |
| cg01694400 | 6 | RSPO3 | 127484100 | rs7741021 | 6 | 127468274 | C | A | -0.283981 | 0.0821684 | 0.000548166 | -0.283981 | 0.0821684 | 0.000548166 | 1 | 0.0724141 | 0.039478889 |
| cg25671837 | 6 | RSPO3 | 127513912 | rs9482773 | 6 | 127459552 | C | G | 0.407356 | 0.117249 | 0.000512347 | 0.407356 | 0.117249 | 0.000512347 | 1 | 0.0346602 | 0.037688901 |
| cg10242496 | 6 | SLC35D3 | 137242316 | rs9483967 | 6 | 137253882 | A | G | -1.24522 | 0.361759 | 0.00057727 | -1.24522 | 0.361759 | 0.00057727 | 1 | 0.0411206 | 0.041010202 |
| cg05124190 | 6 | - | 137952733 | rs12210705 | 6 | 137953165 | C | A | 0.367978 | 0.0932496 | 7.94E-05 | 0.367978 | 0.0932496 | 7.94E-05 | 1 | 0.122202 | 0.008583041 |
| cg26849637 | 6 | PPP1R14C | 150530249 | rs17079471 | 6 | 150553152 | C | T | 0.682434 | 0.234193 | 0.003568685 | 0.681766 | 0.201368 | 0.000710164 | 2 | 0.0478451 | 0.048373826 |
| cg24873280 | 6 | IPCEF1 | 154651158 | rs2696360 | 6 | 154642748 | T | C | 0.230703 | 0.0734914 | 0.001694312 | 0.393672 | 0.109969 | 0.000343866 | 2 | 0.428504 | 0.027693232 |
| cg02287007 | 6 | RPS6KA2 | 166877038 | rs4709116 | 6 | 166886922 | C | T | -0.215183 | 0.131693 | 0.1022642 | -0.304573 | 0.0832996 | 0.000255899 | 4 | 0.15632 | 0.021857489 |
| cg06454157 | 6 | - | 167490870 | rs2239826 | 6 | 167504880 | C | T | -0.28752 | 0.0751374 | 0.000129976 | -0.28752 | 0.0751374 | 0.000129976 | 1 | 0.0885884 | 0.01278268 |
| cg06323479 | 6 | - | 167507729 | rs150115 | 6 | 167507658 | G | A | -0.419778 | 0.111323 | 0.000162762 | -0.419778 | 0.111323 | 0.000162762 | 1 | 0.210285 | 0.01528768 |
| cg01027553 | 7 | SDK1 | 4037843 | rs998635 | 7 | 4029984 | T | C | 0.263286 | 0.0868561 | 0.002435248 | 0.28818 | 0.08119 | 0.000386119 | 2 | 0.110806 | 0.030357163 |
| cg07230486 | 7 | PHF14 | 11012873 | rs117359527 | 7 | 11013107 | G | A | 0.444098 | 0.116615 | 0.000139999 | 0.444098 | 0.116615 | 0.000139999 | 1 | 0.39442 | 0.01362319 |
| cg27578754 | 7 | PHF14 | 11012967 | rs117491489 | 7 | 11043330 | G | C | 0.453804 | 0.130228 | 0.000492829 | 0.453804 | 0.130228 | 0.000492829 | 1 | 0.331142 | 0.036614414 |
| cg12192582 | 7 | ELMO1 | 37392880 | rs75819806 | 7 | 37389444 | T | C | 0.913344 | 0.158021 | 7.50E-09 | 0.913344 | 0.158021 | 7.50E-09 | 1 | 0.0321929 | 3.47E-06 |
| cg02311378 | 7 | ZNF680 | 64023522 | rs112261938 | 7 | 64037541 | C | G | 0.68034 | 0.201628 | 0.000740296 | 0.68034 | 0.201628 | 0.000740296 | 1 | 0.0166769 | 0.04981922 |
| cg12629796 | 7 | - | 74050146 | rs6964833 | 7 | 74101909 | C | T | -0.491482 | 0.115358 | 2.04E-05 | -0.491482 | 0.115358 | 2.04E-05 | 1 | 0.0451323 | 0.002789991 |
| cg22641542 | 7 | - | 74068697 | rs2527367 | 7 | 74099138 | C | T | 0.735412 | 0.165787 | 9.18E-06 | 0.735412 | 0.165787 | 9.18E-06 | 1 | 0.0186944 | 0.001444474 |
| cg21983531 | 7 | GTF2I | 74075317 | rs2527374 | 7 | 74095687 | T | A | 0.523976 | 0.118633 | 1.00E-05 | 0.523976 | 0.118633 | 1.00E-05 | 1 | 0.0368286 | 0.001554068 |
| cg23667916 | 7 | GTF2I | 74098293 | rs13227433 | 7 | 74094721 | G | T | -0.950299 | 0.216831 | 1.17E-05 | -0.950299 | 0.216831 | 1.17E-05 | 1 | 0.0129847 | 0.001759494 |
| cg24977276 | 7 | GTF2I | 74105270 | rs6967152 | 7 | 74099317 | T | C | -0.354876 | 0.0813082 | 1.27E-05 | -0.354876 | 0.0813082 | 1.27E-05 | 1 | 0.0914763 | 0.001870206 |
| cg08742095 | 7 | CALU | 128383253 | rs1006024 | 7 | 128389559 | C | T | 0.273362 | 0.0753263 | 0.000284554 | 0.260679 | 0.0719616 | 0.000291873 | 2 | 0.114319 | 0.024265244 |
| cg02354431 | 7 | - | 128423266 | rs339086 | 7 | 128423617 | C | T | 0.491613 | 0.144387 | 0.000662173 | 0.491613 | 0.144387 | 0.000662173 | 1 | 0.0242847 | 0.045758525 |
| cg26616347 | 7 | IRF5 | 128577752 | rs3823536 | 7 | 128579666 | A | G | -0.757568 | 0.0631416 | 3.76E-33 | -0.757568 | 0.0631416 | 3.76E-33 | 1 | 0.11846 | 4.06E-29 |
| cg06630958 | 7 | IRF5 | 128577819 | rs3757387 | 7 | 128576086 | C | T | -0.616661 | 0.0507413 | 5.70E-34 | -0.629007 | 0.0892359 | 1.82E-12 | 2 | 0.18583 | 1.68E-09 |
| cg22630713 | 7 | IRF5 | 128577824 | rs3757387 | 7 | 128576086 | C | T | -0.850079 | 0.0699479 | 5.70E-34 | -0.850079 | 0.0699479 | 5.70E-34 | 1 | 0.0959452 | 8.41E-30 |
| cg00140447 | 7 | IRF5 | 128580709 | rs3823536 | 7 | 128579666 | A | G | -0.623518 | 0.0519688 | 3.76E-33 | -0.623518 | 0.0519688 | 3.76E-33 | 1 | 0.174908 | 4.06E-29 |
| cg04086097 | 7 | IRF5 | 128580792 | rs4731532 | 7 | 128572766 | G | A | 1.43605 | 0.127437 | 1.92E-29 | 0.94466 | 0.148784 | 2.17E-10 | 1 | 0.0239873 | 1.44E-07 |
| cg19972273 | 7 | - | 128594194 | rs2070197 | 7 | 128589000 | C | T | 2.61525 | 0.19836 | 1.12E-39 | 1.37743 | 0.358607 | 0.000122557 | 1 | 0.00540042 | 0.012249429 |
| cg07303308 | 7 | LOC286016 | 128695042 | rs2242028 | 7 | 128694976 | C | T | -0.820665 | 0.21875 | 0.000175759 | -0.820665 | 0.21875 | 0.000175759 | 1 | 0.0152684 | 0.016263463 |
| cg11209892 | 7 | LOC286016 | 128695548 | rs11976775 | 7 | 128691990 | A | G | -0.462068 | 0.119151 | 0.00010535 | -0.462068 | 0.119151 | 0.00010535 | 1 | 0.0509508 | 0.010927121 |
| cg03892815 | 7 | - | 138708877 | rs11768697 | 7 | 138714888 | C | T | 0.141838 | 0.0293904 | 1.39E-06 | 0.141838 | 0.0293904 | 1.39E-06 | 1 | 0.542994 | 0.00031018 |
| cg02433509 | 7 | ZC3HAV1L | 138719131 | rs7785411 | 7 | 138717762 | C | T | 0.635318 | 0.127889 | 6.78E-07 | 0.635318 | 0.127889 | 6.78E-07 | 1 | 0.0289102 | 0.000165628 |
| cg05576245 | 7 | ZC3HAV1L | 138719784 | rs10279634 | 7 | 138701633 | A | G | 0.930615 | 0.186253 | 5.85E-07 | 0.930615 | 0.186253 | 5.85E-07 | 1 | 0.0132682 | 0.000145824 |
| cg19734163 | 7 | ZC3HAV1L | 138720989 | rs10279658 | 7 | 138701707 | A | T | 0.68009 | 0.138995 | 9.95E-07 | 0.68009 | 0.138995 | 9.95E-07 | 1 | 0.0239427 | 0.000232106 |
| cg24251035 | 7 | ZC3HAV1L | 138721065 | rs10252810 | 7 | 138704135 | T | C | 0.312685 | 0.0650884 | 1.56E-06 | 0.312685 | 0.0650884 | 1.56E-06 | 1 | 0.108993 | 0.000340246 |
| cg01154622 | 7 | - | 138723354 | rs10225558 | 7 | 138725878 | C | T | -1.14906 | 0.211374 | 5.46E-08 | -1.14906 | 0.211374 | 5.46E-08 | 1 | 0.0109914 | 1.86E-05 |
| cg23834013 | 7 | ZC3HAV1 | 138729073 | rs10273974 | 7 | 138735512 | C | A | 0.4063 | 0.078138 | 2.00E-07 | 0.4063 | 0.078138 | 2.00E-07 | 1 | 0.074487 | 5.68E-05 |
| cg00303210 | 7 | ZC3HAV1 | 138745709 | rs10273974 | 7 | 138735512 | C | A | 0.689257 | 0.132555 | 2.00E-07 | 0.689257 | 0.132555 | 2.00E-07 | 1 | 0.0258391 | 5.68E-05 |
| cg16700935 | 7 | ESYT2 | 158531694 | rs58784790 | 7 | 158531500 | A | G | -0.449431 | 0.129747 | 0.000532475 | -0.449431 | 0.129747 | 0.000532475 | 1 | 0.0529754 | 0.038672782 |
| cg10317790 | 7 | ESYT2 | 158531733 | rs6960146 | 7 | 158529263 | A | G | -1.29362 | 0.372358 | 0.000512618 | -1.29362 | 0.372358 | 0.000512618 | 1 | 0.00636524 | 0.037688901 |
| cg01069256 | 8 | FAM164A | 79577942 | rs1026920 | 8 | 79632010 | G | A | 0.674705 | 0.163266 | 3.59E-05 | 0.674705 | 0.163266 | 3.59E-05 | 1 | 0.020788 | 0.00448697 |
| cg08519575 | 8 | FAM164A | 79578124 | rs13265322 | 8 | 79615251 | C | A | 0.806951 | 0.204198 | 7.76E-05 | 0.806951 | 0.204198 | 7.76E-05 | 1 | 0.0132069 | 0.008408695 |
| cg01810186 | 8 | - | 120058222 | rs13264791 | 8 | 120013090 | T | C | -0.190584 | 0.0669497 | 0.004417951 | -0.185275 | 0.0548541 | 0.000731319 | 2 | 0.810798 | 0.049440892 |
| cg00444740 | 8 | MIR1208 | 129162178 | rs2720691 | 8 | 129163348 | T | A | -0.633268 | 0.176114 | 0.000323491 | -0.633268 | 0.176114 | 0.000323491 | 1 | 0.0455755 | 0.026406549 |
| cg27509867 | 8 | - | 129165585 | rs2720699 | 8 | 129177351 | A | G | 0.236699 | 0.0690318 | 0.000606257 | 0.236699 | 0.0690318 | 0.000606257 | 1 | 0.293973 | 0.042751036 |
| cg00618309 | 8 | - | 129263509 | rs7826937 | 8 | 129264171 | C | T | 0.463163 | 0.114769 | 5.45E-05 | 0.463163 | 0.114769 | 5.45E-05 | 1 | 0.0392622 | 0.006287247 |
| cg20999934 | 9 | SUGT1P1 | 33290511 | rs830576 | 9 | 33290532 | A | G | 0.173715 | 0.0485564 | 0.000346845 | 0.173715 | 0.0485564 | 0.000346845 | 1 | 0.351869 | 0.027919324 |
| cg27443224 | 9 | CCL21 | 34710135 | rs11574915 | 9 | 34710084 | C | A | 0.189599 | 0.0443294 | 1.90E-05 | 0.176394 | 0.0422748 | 3.01E-05 | 4 | 0.676268 | 0.003893425 |
| cg13675835 | 9 | PAX5 | 37030825 | rs62533709 | 9 | 37003704 | T | C | 0.547227 | 0.162124 | 0.000737318 | 0.547227 | 0.162124 | 0.000737318 | 1 | 0.0503016 | 0.049680721 |
| cg14009912 | 9 | SHC3 | 91636851 | rs78733107 | 9 | 91625073 | G | A | -0.567235 | 0.207748 | 0.006325917 | -0.566878 | 0.163145 | 0.000511536 | 2 | 0.24847 | 0.037660604 |
| cg13940029 | 9 | CENPP | 95239186 | rs7029879 | 9 | 95114053 | T | C | 0.406022 | 0.119261 | 0.000662988 | 0.406022 | 0.119261 | 0.000662988 | 1 | 0.0873635 | 0.045795345 |
| cg13719746 | 9 | ANP32B | 100747559 | rs4742711 | 9 | 100780790 | A | G | -0.970001 | 0.178704 | 5.71E-08 | -0.970001 | 0.178704 | 5.71E-08 | 1 | 0.023689 | 1.92E-05 |
| cg03588007 | 9 | TRIM14 | 100849274 | rs2281732 | 9 | 100845007 | G | A | -1.08012 | 0.204297 | 1.25E-07 | -1.08012 | 0.204297 | 1.25E-07 | 1 | 0.0182638 | 3.73E-05 |
| cg14133557 | 9 | - | 113802005 | rs4576485 | 9 | 113815164 | G | A | 0.087652 | 0.0393567 | 0.0259394 | 0.111619 | 0.0329465 | 0.000704463 | 6 | 1.91857 | 0.048066237 |
| cg11809085 | 9 | TNFSF15 | 117567756 | rs6478109 | 9 | 117568766 | A | G | 0.459598 | 0.0980877 | 2.79E-06 | 0.459598 | 0.0980877 | 2.79E-06 | 1 | 0.0548112 | 0.000559391 |
| cg24015249 | 9 | DAB2IP | 124498633 | rs10818605 | 9 | 124614496 | C | T | 0.404737 | 0.115162 | 0.00044068 | 0.404737 | 0.115162 | 0.00044068 | 1 | 0.0353489 | 0.033462194 |
| cg13928417 | 9 | DAB2IP | 124498782 | rs7864184 | 9 | 124617259 | T | G | 0.441985 | 0.12844 | 0.000579282 | 0.441985 | 0.12844 | 0.000579282 | 1 | 0.0291112 | 0.041117087 |
| cg14594187 | 9 | DAB2IP | 124498961 | rs10818605 | 9 | 124614496 | C | T | 0.498095 | 0.141726 | 0.00044068 | 0.498095 | 0.141726 | 0.00044068 | 1 | 0.023315 | 0.033462194 |
| cg14136214 | 9 | DAB2IP | 124545901 | rs7864184 | 9 | 124617259 | T | G | 0.481154 | 0.139822 | 0.000579282 | 0.481154 | 0.139822 | 0.000579282 | 1 | 0.0245532 | 0.041117087 |
| cg00629585 | 9 | GFI1B | 135853992 | rs3011270 | 9 | 135883604 | G | A | -1.43542 | 0.306764 | 2.88E-06 | -1.43542 | 0.306764 | 2.88E-06 | 1 | 0.0072337 | 0.000570637 |
| cg13836412 | 9 | VAV2 | 136628684 | rs664026 | 9 | 136824023 | T | C | 0.628404 | 0.131279 | 1.70E-06 | 0.628404 | 0.131279 | 1.70E-06 | 1 | 0.0347349 | 0.00036532 |
| cg21223341 | 9 | VAV2 | 136653337 | rs694505 | 9 | 136821074 | T | C | 1.0687 | 0.229919 | 3.35E-06 | 1.0687 | 0.229919 | 3.35E-06 | 1 | 0.0125883 | 0.000643258 |
| cg14074652 | 9 | VAV2 | 136662289 | rs636667 | 9 | 136822518 | A | G | 0.742358 | 0.153205 | 1.26E-06 | 0.742358 | 0.153205 | 1.26E-06 | 1 | 0.0259482 | 0.000284699 |
| cg14125800 | 9 | VAV2 | 136675160 | rs664026 | 9 | 136824023 | T | C | 0.620138 | 0.129552 | 1.70E-06 | 0.620138 | 0.129552 | 1.70E-06 | 1 | 0.0356698 | 0.00036532 |
| cg13535718 | 9 | VAV2 | 136679985 | rs664026 | 9 | 136824023 | T | C | 0.66706 | 0.139354 | 1.70E-06 | 0.505685 | 0.119571 | 2.35E-05 | 3 | 0.0588984 | 0.003160707 |
| cg13947528 | 9 | VAV2 | 136727132 | rs636667 | 9 | 136822518 | A | G | 0.840008 | 0.173357 | 1.26E-06 | 0.840008 | 0.173357 | 1.26E-06 | 1 | 0.0202439 | 0.000284699 |
| cg14521777 | 9 | VAV2 | 136758765 | rs636667 | 9 | 136822518 | A | G | 1.31838 | 0.272081 | 1.26E-06 | 1.31838 | 0.272081 | 1.26E-06 | 1 | 0.00815812 | 0.000284699 |
| cg14012599 | 9 | VAV2 | 136805113 | rs2519805 | 9 | 136804675 | C | G | -0.537726 | 0.15418 | 0.00048736 | -0.537726 | 0.15418 | 0.00048736 | 1 | 0.028204 | 0.036259427 |
| cg01845476 | 9 | VAV2 | 136833401 | rs664026 | 9 | 136824023 | T | C | 0.544948 | 0.113844 | 1.70E-06 | 0.521717 | 0.107635 | 1.25E-06 | 2 | 0.16544 | 0.000283644 |
| cg02940555 | 10 | - | 1019026 | rs7905827 | 10 | 1012832 | T | G | -0.122235 | 0.0406258 | 0.002622846 | -0.156868 | 0.0441933 | 0.000385912 | 3 | 0.654365 | 0.030357163 |
| cg26870438 | 10 | PFKFB3 | 6186015 | rs3920615 | 10 | 6176780 | C | T | 0.203677 | 0.0641164 | 0.001489894 | 0.208714 | 0.0611026 | 0.000636056 | 2 | 0.125855 | 0.04438894 |
| cg03051116 | 10 | - | 30720703 | rs303435 | 10 | 30731491 | T | C | 0.431365 | 0.102361 | 2.51E-05 | 0.431365 | 0.102361 | 2.51E-05 | 1 | 0.0543171 | 0.003353114 |
| cg26579601 | 10 | MAP3K8 | 30724020 | rs59143367 | 10 | 30811853 | A | T | 1.29455 | 0.304606 | 2.14E-05 | 1.29455 | 0.304606 | 2.14E-05 | 1 | 0.00655066 | 0.00291052 |
| cg19596273 | 10 | MAP3K8 | 30724086 | rs72808078 | 10 | 30814860 | G | T | 0.890208 | 0.192078 | 3.58E-06 | 0.890208 | 0.192078 | 3.58E-06 | 1 | 0.0154789 | 0.000681996 |
| cg03611868 | 10 | - | 43818603 | rs2503875 | 10 | 43814049 | A | G | -0.211651 | 0.0823249 | 0.01014292 | -0.235795 | 0.0688039 | 0.000610274 | 2 | 0.129156 | 0.042866453 |
| cg00404025 | 10 | WDFY4 | 49892741 | rs3747874 | 10 | 50038800 | A | G | 0.933077 | 0.207535 | 6.93E-06 | 0.933077 | 0.207535 | 6.93E-06 | 1 | 0.0105445 | 0.001167965 |
| cg04749316 | 10 | WDFY4 | 49893346 | rs3747874 | 10 | 50038800 | A | G | 0.656059 | 0.14592 | 6.93E-06 | 0.656059 | 0.14592 | 6.93E-06 | 1 | 0.0214026 | 0.001167965 |
| cg20434666 | 10 | WDFY4 | 49893406 | rs11101529 | 10 | 50037974 | G | A | 0.964875 | 0.214458 | 6.83E-06 | 0.964875 | 0.214458 | 6.83E-06 | 1 | 0.0098834 | 0.001158103 |
| cg17967780 | 10 | WDFY4 | 49893445 | rs3747874 | 10 | 50038800 | A | G | 0.72517 | 0.161292 | 6.93E-06 | 0.72517 | 0.161292 | 6.93E-06 | 1 | 0.0174967 | 0.001167965 |
| cg07345108 | 10 | WDFY4 | 49893463 | rs3747874 | 10 | 50038800 | A | G | 0.843663 | 0.187647 | 6.93E-06 | 0.843663 | 0.187647 | 6.93E-06 | 1 | 0.012914 | 0.001167965 |
| cg13513804 | 10 | LRRC18 | 50121894 | rs2671694 | 10 | 50116075 | T | G | 1.29476 | 0.316688 | 4.34E-05 | 1.29476 | 0.316688 | 4.34E-05 | 1 | 0.004691 | 0.005213871 |
| cg01357233 | 10 | LRRC18 | 50123030 | rs41283291 | 10 | 50121760 | A | G | -0.992829 | 0.275506 | 0.000313843 | -0.992829 | 0.275506 | 0.000313843 | 1 | 0.0143366 | 0.025709602 |
| cg19880751 | 10 | PRF1 | 72362618 | rs10999445 | 10 | 72399632 | C | T | -0.1409 | 0.0705032 | 0.0456636 | -0.216282 | 0.0621822 | 0.000504885 | 3 | 0.429198 | 0.03728951 |
| cg19215199 | 10 | ZMIZ1 | 81005284 | rs1250537 | 10 | 81038069 | C | T | -0.31894 | 0.0965663 | 0.000957329 | -0.311651 | 0.0874051 | 0.000363112 | 2 | 0.0636513 | 0.029055575 |
| cg06162030 | 10 | ZMIZ1 | 81053187 | rs1250539 | 10 | 81037229 | A | G | -0.934753 | 0.272479 | 0.000602461 | -0.934753 | 0.272479 | 0.000602461 | 1 | 0.00574753 | 0.042538844 |
| cg18949056 | 10 | SORBS1 | 97317243 | rs10882613 | 10 | 97299171 | A | C | -0.773547 | 0.223864 | 0.000549499 | -0.773547 | 0.223864 | 0.000549499 | 1 | 0.00938919 | 0.039546946 |
| cg08252887 | 10 | CWF19L1 | 102027486 | rs7898075 | 10 | 101973097 | T | C | -0.73272 | 0.206997 | 0.000400567 | -0.73272 | 0.206997 | 0.000400567 | 1 | 0.0110054 | 0.031295745 |
| cg04876582 | 10 | ADAM12 | 127864751 | rs1710278 | 10 | 127738918 | A | G | 0.115422 | 0.0535295 | 0.03106593 | 0.166211 | 0.0429315 | 0.00010819 | 6 | 0.38865 | 0.011143257 |
| cg23266598 | 10 | C10orf90 | 128152247 | rs1710278 | 10 | 127738918 | A | G | -0.181934 | 0.0843761 | 0.03106593 | -0.216292 | 0.0603623 | 0.000339457 | 4 | 0.15973 | 0.027392641 |
| cg25317157 | 10 | C10orf90 | 128165040 | rs1710278 | 10 | 127738918 | A | G | 0.204075 | 0.0946444 | 0.03106593 | 0.207734 | 0.0560958 | 0.000212958 | 4 | 0.182363 | 0.018990143 |
| cg19528419 | 11 | ANO9 | 420266 | rs6421975 | 11 | 443731 | G | A | -0.14171 | 0.0449705 | 0.001626258 | -0.152373 | 0.0439714 | 0.000529782 | 2 | 0.360238 | 0.038531465 |
| cg25227936 | 11 | PTDSS2 | 469636 | rs11821341 | 11 | 460303 | C | T | 0.997601 | 0.245869 | 4.96E-05 | 0.997601 | 0.245869 | 4.96E-05 | 1 | 0.00928489 | 0.005817008 |
| cg22993527 | 11 | PTDSS2 | 473003 | rs7121599 | 11 | 464667 | C | T | 0.306451 | 0.0752205 | 4.62E-05 | 0.306451 | 0.0752205 | 4.62E-05 | 1 | 0.0995187 | 0.005510822 |
| cg10716524 | 11 | PTDSS2 | 474509 | rs7118621 | 11 | 481603 | A | G | -1.1295 | 0.277995 | 4.85E-05 | -1.1295 | 0.277995 | 4.85E-05 | 1 | 0.00726461 | 0.005726816 |
| cg15790184 | 11 | RNH1 | 494944 | rs6598017 | 11 | 464291 | T | C | -0.154234 | 0.0384574 | 6.06E-05 | -0.154234 | 0.0384574 | 6.06E-05 | 1 | 0.381359 | 0.006836126 |
| cg06678137 | 11 | RNH1 | 495007 | rs7935013 | 11 | 467339 | G | A | 1.01851 | 0.250442 | 4.77E-05 | 1.01851 | 0.250442 | 4.77E-05 | 1 | 0.00889894 | 0.005646207 |
| cg11382794 | 11 | RNH1 | 497754 | rs7935013 | 11 | 467339 | G | A | 0.154018 | 0.0378715 | 4.77E-05 | 0.139571 | 0.0354982 | 8.44E-05 | 3 | 0.450268 | 0.009004419 |
| cg19223782 | 11 | RNH1 | 503807 | rs6598017 | 11 | 464291 | T | C | -0.284486 | 0.0709351 | 6.06E-05 | -0.284486 | 0.0709351 | 6.06E-05 | 1 | 0.112032 | 0.006836126 |
| cg17541483 | 11 | - | 521046 | rs6598017 | 11 | 464291 | T | C | -0.213861 | 0.0533253 | 6.06E-05 | -0.213861 | 0.0533253 | 6.06E-05 | 1 | 0.198314 | 0.006836126 |
| cg25504868 | 11 | - | 567480 | rs4963128 | 11 | 589564 | T | C | 0.786903 | 0.192418 | 4.32E-05 | 0.786903 | 0.192418 | 4.32E-05 | 1 | 0.0143977 | 0.005196748 |
| cg08200293 | 11 | MIR210 | 569357 | rs4963128 | 11 | 589564 | T | C | 0.300117 | 0.0733861 | 4.32E-05 | 0.300117 | 0.0733861 | 4.32E-05 | 1 | 0.0995064 | 0.005196748 |
| cg06063517 | 11 | LOC143666 | 575810 | rs12272314 | 11 | 590648 | G | A | 0.610233 | 0.133285 | 4.69E-06 | 0.610233 | 0.133285 | 4.69E-06 | 1 | 0.0354865 | 0.000854266 |
| cg02283811 | 11 | LOC143666 | 576060 | rs7943546 | 11 | 612148 | C | T | -1.06892 | 0.239096 | 7.81E-06 | -1.06892 | 0.239096 | 7.81E-06 | 1 | 0.0117886 | 0.001274293 |
| cg12469954 | 11 | LOC143666 | 576084 | rs1055382 | 11 | 612182 | C | T | -0.351742 | 0.0806791 | 1.30E-05 | -0.351742 | 0.0806791 | 1.30E-05 | 1 | 0.098055 | 0.001896277 |
| cg25535316 | 11 | PHRF1 | 579198 | rs7941547 | 11 | 611503 | A | G | 0.255975 | 0.0570784 | 7.31E-06 | 0.255975 | 0.0570784 | 7.31E-06 | 1 | 0.198035 | 0.001216902 |
| cg24052417 | 11 | PHRF1 | 598551 | rs12801890 | 11 | 621795 | A | G | -1.51855 | 0.385306 | 8.11E-05 | -1.51855 | 0.385306 | 8.11E-05 | 1 | 0.00475905 | 0.008698278 |
| cg02461776 | 11 | PHRF1 | 598696 | rs1124816 | 11 | 619671 | T | C | -0.322849 | 0.0788445 | 4.23E-05 | -0.322849 | 0.0788445 | 4.23E-05 | 1 | 0.108812 | 0.0051195 |
| cg07615816 | 11 | PHRF1 | 599036 | rs61877829 | 11 | 582727 | T | C | -1.23162 | 0.269909 | 5.05E-06 | -1.23162 | 0.269909 | 5.05E-06 | 1 | 0.00997887 | 0.000905783 |
| cg08368638 | 11 | PHRF1 | 601753 | rs1124816 | 11 | 619671 | T | C | -0.542771 | 0.132553 | 4.23E-05 | -0.542771 | 0.132553 | 4.23E-05 | 1 | 0.0384268 | 0.0051195 |
| cg11791770 | 11 | PHRF1 | 611791 | rs7122021 | 11 | 595810 | G | A | 0.463673 | 0.105057 | 1.02E-05 | 0.463673 | 0.105057 | 1.02E-05 | 1 | 0.0626582 | 0.001568471 |
| cg27271532 | 11 | IRF7 | 612762 | rs1055382 | 11 | 612182 | C | T | 0.388836 | 0.0891875 | 1.30E-05 | 0.388836 | 0.0891875 | 1.30E-05 | 1 | 0.0802256 | 0.001896277 |
| cg05309505 | 11 | IRF7 | 612837 | rs4963128 | 11 | 589564 | T | C | -1.68065 | 0.410962 | 4.32E-05 | -1.68065 | 0.410962 | 4.32E-05 | 1 | 0.00308686 | 0.005196748 |
| cg08926253 | 11 | IRF7 | 614761 | rs7941547 | 11 | 611503 | A | G | 0.421999 | 0.0940993 | 7.31E-06 | 0.421999 | 0.0940993 | 7.31E-06 | 1 | 0.0727997 | 0.001216902 |
| cg22016995 | 11 | IRF7 | 614787 | rs1051390 | 11 | 613165 | C | G | 0.582333 | 0.133204 | 1.23E-05 | 0.582333 | 0.133204 | 1.23E-05 | 1 | 0.0359022 | 0.001827897 |
| cg01842473 | 11 | IRF7 | 617407 | rs702966 | 11 | 611919 | G | C | 0.143509 | 0.0329117 | 1.30E-05 | 0.143509 | 0.0329117 | 1.30E-05 | 1 | 0.589628 | 0.001895635 |
| cg01714160 | 11 | IRF7 | 617467 | rs1124816 | 11 | 619671 | T | C | 1.20864 | 0.295167 | 4.23E-05 | 1.20864 | 0.295167 | 4.23E-05 | 1 | 0.00766136 | 0.0051195 |
| cg15780465 | 11 | IRF7 | 617476 | rs4963128 | 11 | 589564 | T | C | -1.30415 | 0.318898 | 4.32E-05 | -1.30415 | 0.318898 | 4.32E-05 | 1 | 0.00518525 | 0.005196748 |
| cg23724016 | 11 | MUPCDH | 617708 | rs1124816 | 11 | 619671 | T | C | 0.346961 | 0.0847331 | 4.23E-05 | 0.346961 | 0.0847331 | 4.23E-05 | 1 | 0.0941968 | 0.0051195 |
| cg09218773 | 11 | MUPCDH | 619014 | rs4963128 | 11 | 589564 | T | C | 0.310356 | 0.0758898 | 4.32E-05 | 0.264034 | 0.0764783 | 0.000555698 | 2 | 0.130764 | 0.039897281 |
| cg11464053 | 11 | MUPCDH | 619080 | rs1124816 | 11 | 619671 | T | C | 0.551599 | 0.134709 | 4.23E-05 | 0.551599 | 0.134709 | 4.23E-05 | 1 | 0.0372032 | 0.0051195 |
| cg08129366 | 11 | MUPCDH | 621297 | rs12419618 | 11 | 611531 | A | G | 0.948908 | 0.21842 | 1.40E-05 | 0.948908 | 0.21842 | 1.40E-05 | 1 | 0.0141941 | 0.002021032 |
| cg14255177 | 11 | MUPCDH | 621688 | rs7941547 | 11 | 611503 | A | G | 1.1025 | 0.24584 | 7.31E-06 | 1.1025 | 0.24584 | 7.31E-06 | 1 | 0.0105778 | 0.001216902 |
| cg06616055 | 11 | MUPCDH | 623756 | rs1055382 | 11 | 612182 | C | T | -0.234468 | 0.0537801 | 1.30E-05 | -0.234468 | 0.0537801 | 1.30E-05 | 1 | 0.220812 | 0.001896277 |
| cg14149701 | 11 | MUPCDH | 624995 | rs12272314 | 11 | 590648 | G | A | -0.481987 | 0.105274 | 4.69E-06 | -0.481987 | 0.105274 | 4.69E-06 | 1 | 0.05694 | 0.000854266 |
| cg05198900 | 11 | MUPCDH | 625023 | rs12272314 | 11 | 590648 | G | A | -0.979193 | 0.213871 | 4.69E-06 | -0.979193 | 0.213871 | 4.69E-06 | 1 | 0.0137186 | 0.000854266 |
| cg22289115 | 11 | MUPCDH | 625796 | rs1124816 | 11 | 619671 | T | C | 0.712527 | 0.17401 | 4.23E-05 | 0.712527 | 0.17401 | 4.23E-05 | 1 | 0.0222513 | 0.0051195 |
| cg08057038 | 11 | MUPCDH | 626128 | rs4963128 | 11 | 589564 | T | C | 0.387195 | 0.094679 | 4.32E-05 | 0.394467 | 0.0882289 | 7.79E-06 | 2 | 0.0766948 | 0.001274102 |
| cg10730078 | 11 | SCT | 627968 | rs1124816 | 11 | 619671 | T | C | 0.270042 | 0.0659483 | 4.23E-05 | 0.257003 | 0.0630979 | 4.64E-05 | 2 | 0.170246 | 0.005517082 |
| cg05782292 | 11 | SCT | 628318 | rs1124816 | 11 | 619671 | T | C | 0.946137 | 0.231061 | 4.23E-05 | 0.946137 | 0.231061 | 4.23E-05 | 1 | 0.0125719 | 0.0051195 |
| cg23231692 | 11 | DRD4 | 636167 | rs1131665 | 11 | 613208 | C | T | 1.19387 | 0.272324 | 1.17E-05 | 1.19387 | 0.272324 | 1.17E-05 | 1 | 0.00851168 | 0.001750575 |
| cg08726248 | 11 | DRD4 | 637032 | rs7941547 | 11 | 611503 | A | G | 0.50608 | 0.112848 | 7.31E-06 | 0.50608 | 0.112848 | 7.31E-06 | 1 | 0.0505887 | 0.001216902 |
| cg15861585 | 11 | DRD4 | 637038 | rs702966 | 11 | 611919 | G | C | 0.374771 | 0.0859481 | 1.30E-05 | 0.374771 | 0.0859481 | 1.30E-05 | 1 | 0.0863726 | 0.001895635 |
| cg06825142 | 11 | DRD4 | 637170 | rs11246227 | 11 | 641548 | T | C | 1.6165 | 0.309341 | 1.74E-07 | 1.6165 | 0.309341 | 1.74E-07 | 1 | 0.00526102 | 5.02E-05 |
| cg02762115 | 11 | DRD4 | 640446 | rs1124816 | 11 | 619671 | T | C | 0.20257 | 0.0494705 | 4.23E-05 | 0.150182 | 0.0428776 | 0.000460895 | 4 | 0.643242 | 0.034692428 |
| cg21531416 | 11 | DEAF1 | 646580 | rs7117022 | 11 | 583787 | C | T | -0.794671 | 0.175998 | 6.33E-06 | -0.794671 | 0.175998 | 6.33E-06 | 1 | 0.0235183 | 0.001086102 |
| cg21849770 | 11 | DEAF1 | 686682 | rs28392994 | 11 | 679915 | A | G | -0.980127 | 0.215474 | 5.40E-06 | -0.980127 | 0.215474 | 5.40E-06 | 1 | 0.0101473 | 0.000952076 |
| cg26272260 | 11 | TMEM80 | 702252 | rs11246262 | 11 | 680647 | C | A | -0.42889 | 0.0941363 | 5.22E-06 | -0.42889 | 0.0941363 | 5.22E-06 | 1 | 0.0532893 | 0.000930701 |
| cg01963374 | 11 | EPS8L2 | 704987 | rs12291981 | 11 | 681502 | G | C | 0.336059 | 0.0744624 | 6.39E-06 | 0.336059 | 0.0744624 | 6.39E-06 | 1 | 0.0856863 | 0.001095691 |
| cg13582001 | 11 | EPS8L2 | 706533 | rs6597995 | 11 | 677200 | A | G | 0.332545 | 0.0730336 | 5.29E-06 | 0.332545 | 0.0730336 | 5.29E-06 | 1 | 0.0884443 | 0.000935129 |
| cg19246862 | 11 | EPS8L2 | 706635 | rs11246262 | 11 | 680647 | C | A | 0.267811 | 0.0587812 | 5.22E-06 | 0.239983 | 0.0571928 | 2.72E-05 | 2 | 0.309839 | 0.003570754 |
| cg11228197 | 11 | EPS8L2 | 708640 | rs7112962 | 11 | 654091 | A | G | 0.846762 | 0.186137 | 5.39E-06 | 0.846762 | 0.186137 | 5.39E-06 | 1 | 0.0146539 | 0.000951217 |
| cg02390725 | 11 | SLC22A18 | 2925768 | rs4758501 | 11 | 2990693 | G | T | 1.13858 | 0.243833 | 3.02E-06 | 1.13858 | 0.243833 | 3.02E-06 | 1 | 0.0104249 | 0.000588966 |
| cg25555424 | 11 | PHLDA2 | 2950735 | rs4758501 | 11 | 2990693 | G | T | 1.7038 | 0.364877 | 3.02E-06 | 1.7038 | 0.364877 | 3.02E-06 | 1 | 0.004596 | 0.000588966 |
| cg02011054 | 11 | PHLDA2 | 2950754 | rs4758501 | 11 | 2990693 | G | T | 0.418017 | 0.0895207 | 3.02E-06 | 0.418017 | 0.0895207 | 3.02E-06 | 1 | 0.0780391 | 0.000588966 |
| cg26013357 | 11 | PHLDA2 | 2951060 | rs4758501 | 11 | 2990693 | G | T | 0.834067 | 0.17862 | 3.02E-06 | 0.834067 | 0.17862 | 3.02E-06 | 1 | 0.0195204 | 0.000588966 |
| cg16549085 | 11 | PHLDA2 | 2951981 | rs4758501 | 11 | 2990693 | G | T | -0.335642 | 0.0718795 | 3.02E-06 | -0.335642 | 0.0718795 | 3.02E-06 | 1 | 0.121105 | 0.000588966 |
| cg03864215 | 11 | KCNJ11 | 17408437 | rs5215 | 11 | 17408630 | C | T | -0.16637 | 0.0533484 | 0.001817486 | -0.183892 | 0.0507308 | 0.000289191 | 3 | 0.222044 | 0.024104231 |
| cg13507563 | 11 | SERGEF | 17952483 | rs916975 | 11 | 17975264 | T | A | 0.179765 | 0.059484 | 0.002510665 | 0.199618 | 0.0588302 | 0.000691127 | 2 | 0.192825 | 0.047375667 |
| cg21584495 | 11 | SERGEF | 17973565 | rs916975 | 11 | 17975264 | T | A | 0.166458 | 0.0550809 | 0.002510665 | 0.189017 | 0.05461 | 0.000537821 | 2 | 0.210704 | 0.038906684 |
| cg12449325 | 11 | - | 34814081 | rs11032879 | 11 | 34817940 | T | C | 0.363511 | 0.102894 | 0.000411186 | 0.363511 | 0.102894 | 0.000411186 | 1 | 0.043911 | 0.03195602 |
| cg08991910 | 11 | - | 34858035 | rs1891291 | 11 | 34813620 | C | T | -0.864072 | 0.234892 | 0.000234585 | -0.864072 | 0.234892 | 0.000234585 | 1 | 0.00829973 | 0.020479384 |
| cg14378420 | 11 | - | 35086165 | rs2732546 | 11 | 35089085 | T | C | 0.656501 | 0.160197 | 4.17E-05 | 0.656501 | 0.160197 | 4.17E-05 | 1 | 0.0189427 | 0.005084423 |
| cg04171808 | 11 | CD44 | 35188437 | rs353634 | 11 | 35185056 | A | G | 1.08767 | 0.277978 | 9.13E-05 | 1.08767 | 0.277978 | 9.13E-05 | 1 | 0.00797384 | 0.00965201 |
| cg01258949 | 11 | C11orf49 | 47092992 | rs11039074 | 11 | 47081732 | C | T | 0.314052 | 0.0930179 | 0.000734911 | 0.314052 | 0.0930179 | 0.000734911 | 1 | 0.0667903 | 0.049621664 |
| cg04915425 | 11 | DDB2 | 47236385 | rs2029298 | 11 | 47234718 | C | T | 0.690455 | 0.198497 | 0.000504483 | 0.690455 | 0.198497 | 0.000504483 | 1 | 0.0151785 | 0.03728951 |
| cg01667133 | 11 | DDB2 | 47236414 | rs11039119 | 11 | 47201924 | A | G | 0.989235 | 0.278328 | 0.000379204 | 0.989235 | 0.278328 | 0.000379204 | 1 | 0.00757866 | 0.030031917 |
| cg24909660 | 11 | NR1H3 | 47276469 | rs141389574 | 11 | 47301209 | G | C | 0.371071 | 0.102448 | 0.00029237 | 0.371071 | 0.102448 | 0.00029237 | 1 | 0.116395 | 0.024269413 |
| cg00536939 | 11 | NR1H3 | 47279352 | rs10838681 | 11 | 47275064 | A | G | -0.568305 | 0.132133 | 1.70E-05 | -0.568305 | 0.132133 | 1.70E-05 | 1 | 0.039825 | 0.0024028 |
| cg21203569 | 11 | NR1H3 | 47279365 | rs59663860 | 11 | 47276350 | C | G | -1.07548 | 0.289505 | 0.000203348 | -1.07548 | 0.289505 | 0.000203348 | 1 | 0.00759298 | 0.018355336 |
| cg08690459 | 11 | NR1H3 | 47279586 | rs10838681 | 11 | 47275064 | A | G | -0.732908 | 0.170404 | 1.70E-05 | -0.732908 | 0.170404 | 1.70E-05 | 1 | 0.0239092 | 0.0024028 |
| cg09548275 | 11 | NR1H3 | 47282999 | rs2279239 | 11 | 47281780 | C | T | -0.389558 | 0.10477 | 0.000200683 | -0.389558 | 0.10477 | 0.000200683 | 1 | 0.0583719 | 0.018134973 |
| cg00347584 | 11 | NR1H3 | 47283025 | rs10838681 | 11 | 47275064 | A | G | -0.668021 | 0.155317 | 1.70E-05 | -0.668021 | 0.155317 | 1.70E-05 | 1 | 0.0287971 | 0.0024028 |
| cg25783544 | 11 | MADD | 47291846 | rs61896050 | 11 | 47309063 | C | T | 0.502918 | 0.130257 | 0.000112986 | 0.502918 | 0.130257 | 0.000112986 | 1 | 0.038667 | 0.01149838 |
| cg26139080 | 11 | MADD | 47293733 | rs1055510 | 11 | 47292237 | G | A | -0.479816 | 0.123505 | 0.000102374 | -0.479816 | 0.123505 | 0.000102374 | 1 | 0.0435483 | 0.010674842 |
| cg16317516 | 11 | MADD | 47294196 | rs4752822 | 11 | 47277652 | C | T | 0.832162 | 0.224269 | 0.000206864 | 0.832162 | 0.224269 | 0.000206864 | 1 | 0.0127227 | 0.018631197 |
| cg04000940 | 11 | MADD | 47351460 | rs4752825 | 11 | 47352409 | A | G | 1.01059 | 0.261836 | 0.000113592 | 1.01059 | 0.261836 | 0.000113592 | 1 | 0.00960746 | 0.011545617 |
| cg09778713 | 11 | MYBPC3 | 47356670 | rs3758669 | 11 | 47272579 | G | A | -1.34239 | 0.356884 | 0.000169 | -1.34239 | 0.356884 | 0.000169 | 1 | 0.00496043 | 0.015718727 |
| cg06147863 | 11 | SPI1 | 47400113 | rs61897432 | 11 | 47431703 | G | A | 0.414325 | 0.110265 | 0.00017165 | 0.411316 | 0.100481 | 4.25E-05 | 2 | 0.0875898 | 0.005136234 |
| cg16517172 | 11 | SPI1 | 47400156 | rs11039322 | 11 | 47662589 | T | C | 0.875237 | 0.258268 | 0.000701901 | 0.875237 | 0.258268 | 0.000701901 | 1 | 0.0148886 | 0.047931817 |
| cg03301240 | 11 | SPI1 | 47400330 | rs61897430 | 11 | 47427621 | A | G | 0.2611 | 0.0660386 | 7.70E-05 | 0.2611 | 0.0660386 | 7.70E-05 | 1 | 0.223284 | 0.00835199 |
| cg09739398 | 11 | - | 47416886 | rs17726706 | 11 | 47476377 | C | A | -1.36462 | 0.367757 | 0.000206782 | -1.36462 | 0.367757 | 0.000206782 | 1 | 0.0083443 | 0.018631197 |
| cg08922808 | 11 | PSMC3 | 47448170 | rs9919526 | 11 | 47451623 | T | C | -1.09196 | 0.247068 | 9.89E-06 | -1.09196 | 0.247068 | 9.89E-06 | 1 | 0.012103 | 0.001539313 |
| cg08722104 | 11 | PSMC3 | 47448306 | rs7119556 | 11 | 47461480 | T | C | -1.57379 | 0.361366 | 1.33E-05 | -1.57379 | 0.361366 | 1.33E-05 | 1 | 0.00566307 | 0.001931415 |
| cg14709817 | 11 | CUGBP1 | 47539488 | rs61897424 | 11 | 47406065 | T | C | -1.15855 | 0.287167 | 5.48E-05 | -1.15855 | 0.287167 | 5.48E-05 | 1 | 0.0123572 | 0.006310397 |
| cg01256440 | 11 | FLRT1 | 63886459 | rs2186572 | 11 | 63895887 | G | A | -0.814586 | 0.195496 | 3.09E-05 | -0.814586 | 0.195496 | 3.09E-05 | 1 | 0.0240254 | 0.003974199 |
| cg02914667 | 11 | MACROD1 | 63894453 | rs2096706 | 11 | 63924446 | G | T | 0.756349 | 0.189296 | 6.46E-05 | 0.756349 | 0.189296 | 6.46E-05 | 1 | 0.0254187 | 0.007139804 |
| cg24687543 | 11 | MACROD1 | 63912206 | rs60394481 | 11 | 63909035 | A | G | -0.229951 | 0.057057 | 5.58E-05 | -0.224724 | 0.0561056 | 6.19E-05 | 2 | 0.290926 | 0.006954926 |
| cg24865495 | 11 | MACROD1 | 63912769 | rs12419038 | 11 | 63912736 | G | A | -0.635798 | 0.158144 | 5.81E-05 | -0.635798 | 0.158144 | 5.81E-05 | 1 | 0.0322795 | 0.00664158 |
| cg27390701 | 11 | - | 63936088 | rs11231726 | 11 | 63987339 | T | C | -1.30578 | 0.311523 | 2.77E-05 | -1.30578 | 0.311523 | 2.77E-05 | 1 | 0.00933867 | 0.003635209 |
| cg14654385 | 11 | FERMT3 | 63973006 | rs57021319 | 11 | 63956102 | A | G | 0.972271 | 0.248978 | 9.42E-05 | 0.972271 | 0.248978 | 9.42E-05 | 1 | 0.0143398 | 0.009921228 |
| cg22056218 | 11 | FERMT3 | 63973536 | rs78038516 | 11 | 63978067 | G | C | 0.520153 | 0.127118 | 4.28E-05 | 0.520153 | 0.127118 | 4.28E-05 | 1 | 0.0558062 | 0.005159656 |
| cg20162599 | 11 | FERMT3 | 63990138 | rs2701530 | 11 | 63923377 | A | T | 1.01192 | 0.416996 | 0.01523698 | 1.02881 | 0.30492 | 0.000740835 | 2 | 0.0135531 | 0.049834813 |
| cg20160996 | 11 | FERMT3 | 63990575 | rs78038516 | 11 | 63978067 | G | C | -1.37883 | 0.336966 | 4.28E-05 | -1.37883 | 0.336966 | 4.28E-05 | 1 | 0.00782969 | 0.005159656 |
| cg04369964 | 11 | DNAJC4 | 63997586 | rs61886886 | 11 | 64104488 | T | C | 0.804162 | 0.127382 | 2.75E-10 | 0.804162 | 0.127382 | 2.75E-10 | 1 | 0.0317148 | 1.80E-07 |
| cg23796481 | 11 | BAD | 64053134 | rs627425 | 11 | 64087642 | T | C | -0.201459 | 0.0317476 | 2.22E-10 | -0.237847 | 0.0429679 | 3.11E-08 | 4 | 0.688824 | 1.15E-05 |
| cg20975835 | 11 | CCDC88B | 64107374 | rs479777 | 11 | 64107477 | C | T | 0.310318 | 0.0513946 | 1.57E-09 | 0.294414 | 0.0734795 | 6.16E-05 | 3 | 0.233692 | 0.00691933 |
| cg18085627 | 11 | CCDC88B | 64107672 | rs479777 | 11 | 64107477 | C | T | 1.51544 | 0.250986 | 1.57E-09 | 1.51544 | 0.250986 | 1.57E-09 | 1 | 0.00891797 | 8.25E-07 |
| cg22916017 | 11 | CCDC88B | 64110731 | rs566128 | 11 | 64118267 | A | G | -0.711679 | 0.127614 | 2.46E-08 | -0.711679 | 0.127614 | 2.46E-08 | 1 | 0.0323439 | 9.28E-06 |
| cg24438178 | 11 | CCDC88B | 64120354 | rs3759057 | 11 | 64125680 | A | G | -0.427682 | 0.123189 | 0.000517155 | -0.427682 | 0.123189 | 0.000517155 | 1 | 0.0505861 | 0.037953615 |
| cg03153608 | 11 | RPS6KA4 | 64126457 | rs10792431 | 11 | 64158950 | T | C | 1.2702 | 0.289608 | 1.16E-05 | 1.2702 | 0.289608 | 1.16E-05 | 1 | 0.00625145 | 0.001741495 |
| cg04618331 | 11 | RPS6KA4 | 64136263 | rs1199045 | 11 | 64117878 | T | C | -1.35688 | 0.24377 | 2.61E-08 | -1.35688 | 0.24377 | 2.61E-08 | 1 | 0.00880769 | 9.79E-06 |
| cg27022558 | 11 | - | 64141041 | rs10897487 | 11 | 64140704 | T | C | 0.437671 | 0.075782 | 7.70E-09 | 0.437671 | 0.075782 | 7.70E-09 | 1 | 0.0882682 | 3.56E-06 |
| cg14008686 | 11 | - | 64183154 | rs10792431 | 11 | 64158950 | T | C | -1.95453 | 0.445636 | 1.16E-05 | -1.95453 | 0.445636 | 1.16E-05 | 1 | 0.00258945 | 0.001741495 |
| cg07273992 | 11 | - | 68925191 | rs10736671 | 11 | 68858907 | G | A | 0.104397 | 0.0333795 | 0.001762764 | 0.108637 | 0.0321932 | 0.000739508 | 4 | 0.448068 | 0.049786912 |
| cg23198815 | 11 | - | 87184120 | rs79744783 | 11 | 87211218 | T | C | 0.0933083 | 0.0497342 | 0.06063602 | 0.135324 | 0.0372532 | 0.000280694 | 7 | 3.27541 | 0.023590083 |
| cg15581365 | 11 | CTSC | 88071006 | rs111820705 | 11 | 88046394 | T | C | 0.862895 | 0.234132 | 0.000228307 | 0.862895 | 0.234132 | 0.000228307 | 1 | 0.0632849 | 0.020071852 |
| cg23591869 | 11 | C11orf93 | 111170648 | rs4529910 | 11 | 111243102 | T | G | -1.54041 | 0.319354 | 1.41E-06 | -1.54041 | 0.319354 | 1.41E-06 | 1 | 0.00604029 | 0.000313669 |
| cg20140034 | 11 | POU2AF1 | 111250355 | rs12282082 | 11 | 111229470 | T | C | 0.119778 | 0.0272338 | 1.09E-05 | 0.119778 | 0.0272338 | 1.09E-05 | 1 | 0.892927 | 0.001657054 |
| cg21923959 | 11 | POU2AF1 | 111250566 | rs12282082 | 11 | 111229470 | T | C | 0.333067 | 0.0757289 | 1.09E-05 | 0.333067 | 0.0757289 | 1.09E-05 | 1 | 0.115387 | 0.001657054 |
| cg08305652 | 11 | - | 111469057 | rs512669 | 11 | 111467893 | G | A | -0.426082 | 0.11187 | 0.000139737 | -0.426082 | 0.11187 | 0.000139737 | 1 | 0.0440286 | 0.013605852 |
| cg22437258 | 11 | SIK2 | 111473054 | rs11213970 | 11 | 111528911 | A | G | -1.59019 | 0.397664 | 6.37E-05 | -1.59019 | 0.397664 | 6.37E-05 | 1 | 0.0036595 | 0.007080987 |
| cg23026420 | 11 | PPP2R1B | 111637186 | rs2850247 | 11 | 111637202 | A | C | 0.283462 | 0.0735962 | 0.000117398 | 0.283462 | 0.0735962 | 0.000117398 | 1 | 0.112988 | 0.011858035 |
| cg15545878 | 11 | CRYAB | 111782607 | rs2850247 | 11 | 111637202 | A | C | -0.50609 | 0.131398 | 0.000117398 | -0.50609 | 0.131398 | 0.000117398 | 1 | 0.0353824 | 0.011858035 |
| cg13084335 | 11 | CRYAB | 111782670 | rs2850247 | 11 | 111637202 | A | C | 0.905284 | 0.235042 | 0.000117398 | 0.905284 | 0.235042 | 0.000117398 | 1 | 0.0109944 | 0.011858035 |
| cg26954138 | 11 | C11orf60 | 118437129 | rs11216846 | 11 | 118163916 | A | G | -0.51268 | 0.156383 | 0.001044262 | -0.485798 | 0.116363 | 2.98E-05 | 2 | 0.350257 | 0.003863678 |
| cg20874052 | 11 | C11orf60 | 118437133 | rs9736327 | 11 | 118447580 | G | T | -0.437532 | 0.182521 | 0.01652264 | -0.598588 | 0.139728 | 1.84E-05 | 2 | 0.184883 | 0.002563364 |
| cg05730269 | 11 | PHLDB1 | 118477055 | rs498872 | 11 | 118477367 | A | G | 0.743251 | 0.168446 | 1.02E-05 | 0.851411 | 0.197562 | 1.64E-05 | 2 | 0.024897 | 0.002325444 |
| cg20510012 | 11 | PHLDB1 | 118477147 | rs498872 | 11 | 118477367 | A | G | 0.76034 | 0.172319 | 1.02E-05 | 0.76034 | 0.172319 | 1.02E-05 | 1 | 0.018335 | 0.001575292 |
| cg04142864 | 11 | PHLDB1 | 118480576 | rs11603023 | 11 | 118486067 | T | C | -0.373135 | 0.0998511 | 0.000186347 | -0.373135 | 0.0998511 | 0.000186347 | 1 | 0.0445944 | 0.017048496 |
| cg04315692 | 11 | TREH | 118530575 | rs2276065 | 11 | 118530611 | C | T | 0.320529 | 0.0443349 | 4.87E-13 | 0.320529 | 0.0443349 | 4.87E-13 | 1 | 0.378293 | 5.03E-10 |
| cg26062581 | 11 | - | 118585993 | rs11216960 | 11 | 118577873 | A | G | 0.614999 | 0.0685304 | 2.90E-19 | 0.614999 | 0.0685304 | 2.90E-19 | 1 | 0.152515 | 8.39E-16 |
| cg27385729 | 11 | DDX6 | 118619582 | rs637563 | 11 | 118575479 | G | A | 0.819807 | 0.189246 | 1.48E-05 | 0.819807 | 0.189246 | 1.48E-05 | 1 | 0.0131519 | 0.002123657 |
| cg19308663 | 11 | - | 118741387 | rs4938573 | 11 | 118741842 | C | T | -0.289727 | 0.0237279 | 2.83E-34 | -0.259774 | 0.0413132 | 3.23E-10 | 6 | 2.19256 | 2.05E-07 |
| cg17382048 | 11 | CXCR5 | 118754386 | rs630923 | 11 | 118754353 | A | C | -1.23284 | 0.230787 | 9.22E-08 | -1.23284 | 0.230787 | 9.22E-08 | 1 | 0.0184585 | 2.90E-05 |
| cg16235962 | 11 | CXCR5 | 118754507 | rs630923 | 11 | 118754353 | A | C | -0.593954 | 0.111188 | 9.22E-08 | -0.593954 | 0.111188 | 9.22E-08 | 1 | 0.0800149 | 2.90E-05 |
| cg06394082 | 11 | BCL9L | 118767238 | rs77841686 | 11 | 118762073 | A | G | -0.904888 | 0.223611 | 5.20E-05 | -0.904888 | 0.223611 | 5.20E-05 | 1 | 0.186428 | 0.006030774 |
| cg01637289 | 11 | BCL9L | 118769157 | rs3922 | 11 | 118765600 | G | A | 0.405538 | 0.0921326 | 1.08E-05 | 0.405538 | 0.0921326 | 1.08E-05 | 1 | 0.0573417 | 0.00163495 |
| cg19246076 | 11 | ETS1 | 128329809 | rs4369416 | 11 | 128326463 | T | C | -0.70364 | 0.196349 | 0.000338951 | -0.70364 | 0.196349 | 0.000338951 | 1 | 0.0140118 | 0.027379025 |
| cg08458745 | 11 | ETS1 | 128422788 | rs4245079 | 11 | 128420926 | A | C | -0.238381 | 0.0811887 | 0.003323459 | -0.268993 | 0.0748337 | 0.000325041 | 2 | 0.122025 | 0.026506342 |
| cg15607358 | 12 | SLC6A13 | 372049 | rs10774150 | 12 | 493443 | A | G | 0.545125 | 0.159897 | 0.000651552 | 0.545125 | 0.159897 | 0.000651552 | 1 | 0.0250091 | 0.045275456 |
| cg12601142 | 12 | KDM5A | 495079 | rs11608938 | 12 | 428693 | T | G | -0.198371 | 0.0531745 | 0.000191112 | -0.198371 | 0.0531745 | 0.000191112 | 1 | 0.271372 | 0.01738632 |
| cg24987648 | 12 | KDM5A | 498827 | rs11608938 | 12 | 428693 | T | G | 0.624535 | 0.16741 | 0.000191112 | 0.624535 | 0.16741 | 0.000191112 | 1 | 0.0272856 | 0.01738632 |
| cg07165616 | 12 | KDM5A | 498868 | rs17800744 | 12 | 400466 | C | A | -0.728114 | 0.215181 | 0.000715212 | -0.728114 | 0.215181 | 0.000715212 | 1 | 0.0150926 | 0.048613143 |
| cg04244494 | 12 | CCDC77 | 510476 | rs11608938 | 12 | 428693 | T | G | -1.2182 | 0.326546 | 0.000191112 | -1.2182 | 0.326546 | 0.000191112 | 1 | 0.00709235 | 0.01738632 |
| cg18569661 | 12 | NINJ2 | 678853 | rs78592292 | 12 | 727620 | A | G | -0.303365 | 0.0842272 | 0.000316152 | -0.303365 | 0.0842272 | 0.000316152 | 1 | 0.12235 | 0.025885672 |
| cg26416981 | 12 | NINJ2 | 731864 | rs2535399 | 12 | 717477 | C | A | -0.206566 | 0.0490008 | 2.49E-05 | -0.22019 | 0.0602371 | 0.000256868 | 3 | 0.2304 | 0.021928744 |
| cg26371957 | 12 | NINJ2 | 739280 | rs2535399 | 12 | 717477 | C | A | -0.138744 | 0.0329124 | 2.49E-05 | -0.152367 | 0.0304526 | 5.64E-07 | 3 | 0.798595 | 0.000141362 |
| cg14911689 | 12 | NINJ2 | 739980 | rs2535399 | 12 | 717477 | C | A | -0.146998 | 0.0348704 | 2.49E-05 | -0.137341 | 0.0321923 | 1.99E-05 | 2 | 0.475275 | 0.002732771 |
| cg26654770 | 12 | NINJ2 | 740100 | rs2535399 | 12 | 717477 | C | A | -0.146426 | 0.0347346 | 2.49E-05 | -0.135761 | 0.0319148 | 2.10E-05 | 2 | 0.484559 | 0.002862251 |
| cg19697239 | 12 | NINJ2 | 752646 | rs2535397 | 12 | 713712 | G | A | -0.397438 | 0.107671 | 0.000223228 | -0.397438 | 0.107671 | 0.000223228 | 1 | 0.0753695 | 0.019646609 |
| cg14760797 | 12 | NINJ2 | 753199 | rs56203073 | 12 | 736116 | C | T | -0.0980467 | 0.0272201 | 0.000315852 | -0.0998319 | 0.026886 | 0.000204752 | 3 | 1.21733 | 0.018461538 |
| cg19708984 | 12 | CACNA2D4 | 1973340 | rs12368779 | 12 | 1982151 | T | C | -0.0948552 | 0.042495 | 0.02560518 | -0.104278 | 0.0305911 | 0.000652694 | 4 | 1.35721 | 0.045300202 |
| cg12977447 | 12 | - | 4224915 | rs759306 | 12 | 4228941 | C | A | -0.588418 | 0.164756 | 0.00035508 | -0.588418 | 0.164756 | 0.00035508 | 1 | 0.0205292 | 0.028525555 |
| cg12403778 | 12 | ETV6 | 11804115 | rs1641725 | 12 | 12189684 | T | G | 1.14167 | 0.295008 | 0.00010889 | 1.14167 | 0.295008 | 0.00010889 | 1 | 0.00673586 | 0.011164918 |
| cg09082441 | 12 | ETV6 | 11805154 | rs1797659 | 12 | 12186453 | C | T | 0.836457 | 0.241343 | 0.000528656 | 0.836457 | 0.241343 | 0.000528656 | 1 | 0.00956024 | 0.03850991 |
| cg27411712 | 12 | - | 30976016 | rs2114904 | 12 | 30968662 | G | A | 0.0909469 | 0.117962 | 0.4407149 | 0.354357 | 0.10338 | 0.000608827 | 4 | 0.356708 | 0.042855942 |
| cg01943504 | 12 | GXYLT1 | 42538901 | rs2198763 | 12 | 42651653 | C | T | 0.376099 | 0.109199 | 0.000572924 | 0.376099 | 0.109199 | 0.000572924 | 1 | 0.0513655 | 0.040737137 |
| cg07962309 | 12 | YAF2 | 42628089 | rs2061191 | 12 | 42675207 | A | G | 0.26976 | 0.0750731 | 0.000326598 | 0.26976 | 0.0750731 | 0.000326598 | 1 | 0.114745 | 0.026593173 |
| cg16720847 | 12 | PRICKLE1 | 42854129 | rs3747562 | 12 | 42854205 | G | A | 0.85783 | 0.223591 | 0.000124791 | 0.85783 | 0.223591 | 0.000124791 | 1 | 0.00682146 | 0.012449688 |
| cg21513385 | 12 | SMAGP | 51663484 | rs56833431 | 12 | 51671443 | A | G | 1.09366 | 0.278473 | 8.59E-05 | 1.09366 | 0.278473 | 8.59E-05 | 1 | 0.177855 | 0.009150586 |
| cg03892356 | 12 | HOXC4 | 54420837 | rs754133 | 12 | 54418920 | A | G | -0.740274 | 0.256767 | 0.003938558 | -0.69783 | 0.192653 | 0.00029217 | 2 | 0.0139939 | 0.024265244 |
| cg01105256 | 12 | SUOX | 56390867 | rs705699 | 12 | 56384804 | A | G | 0.752875 | 0.207393 | 0.000283288 | 0.752875 | 0.207393 | 0.000283288 | 1 | 0.0114719 | 0.023697515 |
| cg07060074 | 12 | SUOX | 56390878 | rs705699 | 12 | 56384804 | A | G | 0.638434 | 0.175868 | 0.000283288 | 0.638434 | 0.175868 | 0.000283288 | 1 | 0.0159827 | 0.023697515 |
| cg16853842 | 12 | SUOX | 56390939 | rs705699 | 12 | 56384804 | A | G | 0.822321 | 0.226523 | 0.000283288 | 0.822321 | 0.226523 | 0.000283288 | 1 | 0.0096039 | 0.023697515 |
| cg09689944 | 12 | SUOX | 56390952 | rs705699 | 12 | 56384804 | A | G | 0.55046 | 0.151634 | 0.000283288 | 0.55046 | 0.151634 | 0.000283288 | 1 | 0.021516 | 0.023697515 |
| cg19627869 | 12 | SUOX | 56391069 | rs705699 | 12 | 56384804 | A | G | 0.649297 | 0.178861 | 0.000283288 | 0.649297 | 0.178861 | 0.000283288 | 1 | 0.0154421 | 0.023697515 |
| cg06495347 | 12 | SUOX | 56391451 | rs705699 | 12 | 56384804 | A | G | 0.539846 | 0.14871 | 0.000283288 | 0.539846 | 0.14871 | 0.000283288 | 1 | 0.0223832 | 0.023697515 |
| cg27066319 | 12 | SUOX | 56392003 | rs705699 | 12 | 56384804 | A | G | 0.989451 | 0.272562 | 0.000283288 | 0.989451 | 0.272562 | 0.000283288 | 1 | 0.00660382 | 0.023697515 |
| cg06416472 | 12 | - | 56401126 | rs10876864 | 12 | 56401085 | G | A | 0.95377 | 0.232556 | 4.11E-05 | 0.95377 | 0.232556 | 4.11E-05 | 1 | 0.00898352 | 0.005026642 |
| cg17331199 | 12 | IKZF4 | 56414882 | rs2456973 | 12 | 56416928 | C | A | -0.637528 | 0.180201 | 0.000403442 | -0.637528 | 0.180201 | 0.000403442 | 1 | 0.0157718 | 0.031429524 |
| cg23363971 | 12 | IKZF4 | 56415271 | rs705700 | 12 | 56389293 | C | T | -0.949593 | 0.256796 | 0.000217498 | -0.949593 | 0.256796 | 0.000217498 | 1 | 0.00750481 | 0.019331172 |
| cg20672549 | 12 | IKZF4 | 56432144 | rs1701704 | 12 | 56412487 | G | T | -0.550545 | 0.155027 | 0.000383435 | -0.550545 | 0.155027 | 0.000383435 | 1 | 0.0213172 | 0.030234071 |
| cg14923295 | 12 | RPS26 | 56435580 | rs7302200 | 12 | 56449435 | A | G | -1.39041 | 0.395601 | 0.000440383 | -1.39041 | 0.395601 | 0.000440383 | 1 | 0.00346143 | 0.033462194 |
| cg08627212 | 12 | RPS26 | 56436440 | rs10876864 | 12 | 56401085 | G | A | 0.375044 | 0.0914463 | 4.11E-05 | 0.375044 | 0.0914463 | 4.11E-05 | 1 | 0.0585769 | 0.005026642 |
| cg19258882 | 12 | ERBB3 | 56472805 | rs10876864 | 12 | 56401085 | G | A | -0.770408 | 0.187847 | 4.11E-05 | -0.770408 | 0.187847 | 4.11E-05 | 1 | 0.0138242 | 0.005026642 |
| cg04794420 | 12 | ERBB3 | 56474392 | rs705704 | 12 | 56435412 | A | G | 0.921806 | 0.251041 | 0.000240791 | 0.921806 | 0.251041 | 0.000240791 | 1 | 0.00834046 | 0.02088616 |
| cg10869879 | 12 | ERBB3 | 56474569 | rs705704 | 12 | 56435412 | A | G | 0.251093 | 0.0683818 | 0.000240791 | 0.251093 | 0.0683818 | 0.000240791 | 1 | 0.113422 | 0.02088616 |
| cg00907267 | 12 | ERBB3 | 56474771 | rs10876866 | 12 | 56445366 | A | G | 0.377525 | 0.10782 | 0.000462817 | 0.377525 | 0.10782 | 0.000462817 | 1 | 0.0461395 | 0.034816969 |
| cg11835619 | 12 | ERBB3 | 56475064 | rs2640564 | 12 | 56455294 | T | C | -0.883196 | 0.249394 | 0.000398133 | -0.883196 | 0.249394 | 0.000398133 | 1 | 0.00864291 | 0.031135606 |
| cg17843101 | 12 | ERBB3 | 56478329 | rs10876864 | 12 | 56401085 | G | A | -0.377458 | 0.0920349 | 4.11E-05 | -0.377458 | 0.0920349 | 4.11E-05 | 1 | 0.057829 | 0.005026642 |
| cg23731805 | 12 | ERBB3 | 56479243 | rs705704 | 12 | 56435412 | A | G | 0.261901 | 0.0713251 | 0.000240791 | 0.261901 | 0.0713251 | 0.000240791 | 1 | 0.104247 | 0.02088616 |
| cg10056728 | 12 | PA2G4 | 56497073 | rs10876864 | 12 | 56401085 | G | A | 0.790689 | 0.192792 | 4.11E-05 | 0.790689 | 0.192792 | 4.11E-05 | 1 | 0.0131202 | 0.005026642 |
| cg12178465 | 12 | TAC3 | 57405251 | rs11172113 | 12 | 57527283 | C | T | 1.01792 | 0.262852 | 0.000107716 | 1.01792 | 0.262852 | 0.000107716 | 1 | 0.00693286 | 0.011108469 |
| cg23550060 | 12 | NAB2 | 57484316 | rs324011 | 12 | 57502182 | T | C | -0.563656 | 0.162882 | 0.000539226 | -0.563656 | 0.162882 | 0.000539226 | 1 | 0.0184796 | 0.038956188 |
| cg03894242 | 12 | - | 57513121 | rs12312693 | 12 | 57511734 | C | T | -0.780807 | 0.228967 | 0.000649409 | -0.780807 | 0.228967 | 0.000649409 | 1 | 0.00946271 | 0.045165254 |
| cg02131399 | 12 | LRP1 | 57521155 | rs12368672 | 12 | 57512470 | G | C | -0.823759 | 0.226513 | 0.00027623 | -0.823759 | 0.226513 | 0.00027623 | 1 | 0.00979098 | 0.023323773 |
| cg16766632 | 12 | LRP1 | 57530100 | rs12309413 | 12 | 57513879 | G | C | 0.847613 | 0.244112 | 0.000516236 | 0.847613 | 0.244112 | 0.000516236 | 1 | 0.00835337 | 0.037903358 |
| cg03309176 | 12 | GEFT | 58003774 | rs73123375 | 12 | 58063664 | T | C | -1.2466 | 0.294968 | 2.38E-05 | -1.2466 | 0.294968 | 2.38E-05 | 1 | 0.0076652 | 0.003196739 |
| cg10605137 | 12 | SLC26A10 | 58016356 | rs10876994 | 12 | 58064737 | C | A | -0.601085 | 0.142966 | 2.62E-05 | -0.601085 | 0.142966 | 2.62E-05 | 1 | 0.032835 | 0.003460992 |
| cg08689322 | 12 | OS9 | 58087830 | rs73123375 | 12 | 58063664 | T | C | -1.80047 | 0.426023 | 2.38E-05 | -1.80047 | 0.426023 | 2.38E-05 | 1 | 0.00362329 | 0.003196739 |
| cg03897244 | 12 | - | 58116898 | rs701008 | 12 | 58117645 | C | T | -0.788503 | 0.1964 | 5.95E-05 | -0.788503 | 0.1964 | 5.95E-05 | 1 | 0.0141379 | 0.006762637 |
| cg08425810 | 12 | AGAP2 | 58132558 | rs7965287 | 12 | 58188696 | C | G | -1.07976 | 0.241407 | 7.73E-06 | -1.07976 | 0.241407 | 7.73E-06 | 1 | 0.00956775 | 0.001270529 |
| cg22490255 | 12 | TSPAN31 | 58138949 | rs73123375 | 12 | 58063664 | T | C | -0.306364 | 0.0724914 | 2.38E-05 | -0.253995 | 0.0691799 | 0.000241181 | 2 | 0.262065 | 0.020897635 |
| cg03829839 | 12 | CDK4 | 58146821 | rs2072052 | 12 | 58146719 | C | A | -0.25222 | 0.060203 | 2.80E-05 | -0.25222 | 0.060203 | 2.80E-05 | 1 | 0.159229 | 0.003657514 |
| cg07060721 | 12 | CYP27B1 | 58158537 | rs4646536 | 12 | 58157988 | G | A | 0.813067 | 0.183043 | 8.92E-06 | 0.813067 | 0.183043 | 8.92E-06 | 1 | 0.0163461 | 0.001422705 |
| cg23101118 | 12 | CYP27B1 | 58158888 | rs11172344 | 12 | 58193448 | C | T | 1.76338 | 0.395545 | 8.28E-06 | 1.76338 | 0.395545 | 8.28E-06 | 1 | 0.00351495 | 0.001343059 |
| cg20372759 | 12 | CYP27B1 | 58162287 | rs4646536 | 12 | 58157988 | G | A | -0.953821 | 0.214731 | 8.92E-06 | -0.953821 | 0.214731 | 8.92E-06 | 1 | 0.0118549 | 0.001422705 |
| cg04478727 | 12 | METTL1 | 58166393 | rs10877018 | 12 | 58171726 | C | T | -0.21475 | 0.0483162 | 8.81E-06 | -0.21475 | 0.0483162 | 8.81E-06 | 1 | 0.235774 | 0.001415463 |
| cg20497026 | 12 | FAM119B | 58170306 | rs11172343 | 12 | 58188157 | C | T | -0.488406 | 0.110618 | 1.01E-05 | -0.488406 | 0.110618 | 1.01E-05 | 1 | 0.0458623 | 0.001560635 |
| cg23970338 | 12 | TSFM | 58176483 | rs1021469 | 12 | 58208164 | A | G | 1.42911 | 0.338939 | 2.48E-05 | 1.42911 | 0.338939 | 2.48E-05 | 1 | 0.00530067 | 0.00332231 |
| cg04631757 | 12 | TSFM | 58176492 | rs10877018 | 12 | 58171726 | C | T | 1.6959 | 0.381556 | 8.81E-06 | 1.6959 | 0.381556 | 8.81E-06 | 1 | 0.00369581 | 0.001415463 |
| cg02399098 | 12 | AVIL | 58209787 | rs2072052 | 12 | 58146719 | C | A | 0.666118 | 0.158997 | 2.80E-05 | 0.666118 | 0.158997 | 2.80E-05 | 1 | 0.0227529 | 0.003657514 |
| cg17332198 | 12 | AVIL | 58209913 | rs7965287 | 12 | 58188696 | C | G | 0.25107 | 0.0561328 | 7.73E-06 | 0.220248 | 0.0543701 | 5.10E-05 | 2 | 0.258511 | 0.005936834 |
| cg04046364 | 12 | AVIL | 58210661 | rs2014886 | 12 | 58177437 | T | C | 1.21098 | 0.273173 | 9.30E-06 | 1.21098 | 0.273173 | 9.30E-06 | 1 | 0.00735538 | 0.0014623 |
| cg06317209 | 12 | AVIL | 58210878 | rs9652011 | 12 | 58170556 | C | T | 0.89138 | 0.199678 | 8.05E-06 | 0.89138 | 0.199678 | 8.05E-06 | 1 | 0.0137238 | 0.001310009 |
| cg07617764 | 12 | CTDSP2 | 58218602 | rs3825079 | 12 | 58203354 | T | C | 0.853081 | 0.189119 | 6.46E-06 | 0.853081 | 0.189119 | 6.46E-06 | 1 | 0.0157889 | 0.001105405 |
| cg02566627 | 12 | CTDSP2 | 58232984 | rs701008 | 12 | 58117645 | C | T | 0.8876 | 0.221082 | 5.95E-05 | 0.8876 | 0.221082 | 5.95E-05 | 1 | 0.0111399 | 0.006762637 |
| cg01644731 | 12 | CTDSP2 | 58236712 | rs10783850 | 12 | 58229377 | C | T | 0.652827 | 0.192303 | 0.000686936 | 0.652827 | 0.192303 | 0.000686936 | 1 | 0.0160109 | 0.047128249 |
| cg00677455 | 12 | CTDSP2 | 58241039 | rs10877028 | 12 | 58241028 | G | T | -0.213367 | 0.0587663 | 0.000282651 | -0.213367 | 0.0587663 | 0.000282651 | 1 | 0.167827 | 0.023697515 |
| cg02732509 | 12 | CTDSP2 | 58241200 | rs1599751 | 12 | 58242849 | C | T | -0.158325 | 0.0430132 | 0.000232512 | -0.158325 | 0.0430132 | 0.000232512 | 1 | 0.314283 | 0.020342201 |
| cg02469916 | 12 | - | 70583810 | rs4761179 | 12 | 70578005 | A | C | -1.25953 | 0.353138 | 0.000361601 | -1.25953 | 0.353138 | 0.000361601 | 1 | 0.00378981 | 0.028949005 |
| cg00029284 | 12 | CUX2 | 111731203 | rs1966303 | 12 | 111724442 | T | C | 0.394477 | 0.140344 | 0.004942067 | 0.482073 | 0.130215 | 0.000213861 | 2 | 0.105547 | 0.019049763 |
| cg14733103 | 12 | CUX2 | 111756534 | rs2009170 | 12 | 111703313 | C | T | -0.284229 | 0.0616437 | 4.01E-06 | -0.31987 | 0.0691037 | 3.68E-06 | 2 | 0.247091 | 0.000699625 |
| cg08608727 | 12 | FAM109A | 111799994 | rs7316698 | 12 | 111790511 | T | C | 0.739214 | 0.150888 | 9.64E-07 | 0.739214 | 0.150888 | 9.64E-07 | 1 | 0.0347295 | 0.000226545 |
| cg17577636 | 12 | FAM109A | 111800628 | rs28877654 | 12 | 111783179 | T | G | -1.12759 | 0.230214 | 9.69E-07 | -1.12759 | 0.230214 | 9.69E-07 | 1 | 0.0148515 | 0.000227118 |
| cg19993006 | 12 | FAM109A | 111807180 | rs7306529 | 12 | 111780644 | C | T | -0.582324 | 0.120789 | 1.43E-06 | -0.582324 | 0.120789 | 1.43E-06 | 1 | 0.0546457 | 0.000315548 |
| cg03799530 | 12 | SH2B3 | 111843215 | rs2301621 | 12 | 111895272 | T | C | -1.16791 | 0.163611 | 9.51E-13 | -1.16791 | 0.163611 | 9.51E-13 | 1 | 0.028436 | 9.12E-10 |
| cg01356824 | 12 | SH2B3 | 111849884 | rs73199895 | 12 | 111866087 | A | G | 0.680323 | 0.0982327 | 4.37E-12 | 0.680323 | 0.0982327 | 4.37E-12 | 1 | 0.0879569 | 3.91E-09 |
| cg20524636 | 12 | SH2B3 | 111854869 | rs7965040 | 12 | 111920295 | C | A | -1.23238 | 0.170962 | 5.70E-13 | -1.23238 | 0.170962 | 5.70E-13 | 1 | 0.0259417 | 5.81E-10 |
| cg26214026 | 12 | ATXN2 | 111926384 | rs73428236 | 12 | 112461405 | G | A | -0.878948 | 0.195137 | 6.67E-06 | -0.878948 | 0.195137 | 6.67E-06 | 1 | 0.0458402 | 0.001134007 |
| cg11578064 | 12 | - | 112074044 | rs847895 | 12 | 112118576 | C | T | -0.519777 | 0.0824967 | 2.98E-10 | -0.522639 | 0.0809973 | 1.11E-10 | 2 | 0.134008 | 8.11E-08 |
| cg12405048 | 12 | - | 112074086 | rs609230 | 12 | 112146911 | T | C | -0.991361 | 0.157843 | 3.39E-10 | -0.991361 | 0.157843 | 3.39E-10 | 1 | 0.0354958 | 2.12E-07 |
| cg20884605 | 12 | ALDH2 | 112205368 | rs12427276 | 12 | 112113508 | A | G | 0.928032 | 0.147161 | 2.87E-10 | 0.928032 | 0.147161 | 2.87E-10 | 1 | 0.0413517 | 1.86E-07 |
| cg07629854 | 12 | C12orf47 | 112280892 | rs57646770 | 12 | 112431212 | C | T | -1.11606 | 0.171548 | 7.76E-11 | -1.11606 | 0.171548 | 7.76E-11 | 1 | 0.0302499 | 5.88E-08 |
| cg00049502 | 12 | C12orf47 | 112280971 | rs11066082 | 12 | 112351348 | C | T | 0.727049 | 0.11133 | 6.58E-11 | 0.727049 | 0.11133 | 6.58E-11 | 1 | 0.0714025 | 5.08E-08 |
| cg19563158 | 12 | MAPKAPK5 | 112284205 | rs12315146 | 12 | 112323016 | T | C | 1.61368 | 0.320722 | 4.88E-07 | 1.61368 | 0.320722 | 4.88E-07 | 1 | 0.0144378 | 0.000124113 |
| cg05489292 | 12 | MAPKAPK5 | 112331187 | rs77211491 | 12 | 112322778 | A | G | 0.907202 | 0.254027 | 0.00035531 | 0.907202 | 0.254027 | 0.00035531 | 1 | 0.0275462 | 0.028529838 |
| cg25724123 | 12 | ERP29 | 112450556 | rs7314232 | 12 | 112444517 | C | G | 0.600653 | 0.137455 | 1.24E-05 | 0.600653 | 0.137455 | 1.24E-05 | 1 | 0.0803304 | 0.001837565 |
| cg27135516 | 12 | ERP29 | 112450780 | rs57785510 | 12 | 112829868 | C | T | -1.16552 | 0.280716 | 3.30E-05 | -1.16552 | 0.280716 | 3.30E-05 | 1 | 0.0232183 | 0.004184121 |
| cg18213653 | 12 | C12orf51 | 112605734 | rs12579799 | 12 | 112397887 | C | T | 0.572131 | 0.16109 | 0.000382958 | 0.572131 | 0.16109 | 0.000382958 | 1 | 0.0690279 | 0.030232422 |
| cg22529546 | 12 | - | 112819040 | rs12302278 | 12 | 112512081 | C | G | 1.147 | 0.258451 | 9.09E-06 | 1.147 | 0.258451 | 9.09E-06 | 1 | 0.0226981 | 0.001434732 |
| cg13845105 | 12 | RPL6 | 112846051 | rs16941759 | 12 | 112367921 | A | G | -0.853145 | 0.130884 | 7.14E-11 | -0.853145 | 0.130884 | 7.14E-11 | 1 | 0.051539 | 5.46E-08 |
| cg03788567 | 12 | RPL6 | 112847769 | rs78866396 | 12 | 112522346 | A | G | 0.781648 | 0.222796 | 0.000450963 | 0.781648 | 0.222796 | 0.000450963 | 1 | 0.0365798 | 0.034051577 |
| cg01655703 | 12 | PTPN11 | 112856138 | rs12579799 | 12 | 112397887 | C | T | 0.453817 | 0.127778 | 0.000382958 | 0.453817 | 0.127778 | 0.000382958 | 1 | 0.109832 | 0.030232422 |
| cg16726706 | 12 | - | 116920139 | rs11068043 | 12 | 116925539 | A | C | -0.260276 | 0.0743138 | 0.000461198 | -0.28077 | 0.0700094 | 6.06E-05 | 3 | 0.212905 | 0.006836126 |
| cg02505015 | 12 | - | 121197625 | rs9431 | 12 | 121202664 | A | C | -0.253135 | 0.0612408 | 3.58E-05 | -0.310273 | 0.0675498 | 4.37E-06 | 3 | 0.187677 | 0.000810289 |
| cg16596859 | 12 | - | 121197729 | rs9431 | 12 | 121202664 | A | C | -0.698978 | 0.169103 | 3.58E-05 | -0.698978 | 0.169103 | 3.58E-05 | 1 | 0.015798 | 0.004476529 |
| cg23884120 | 12 | - | 121198406 | rs11065286 | 12 | 121271734 | T | C | -0.684203 | 0.189195 | 0.000298808 | -0.684203 | 0.189195 | 0.000298808 | 1 | 0.0130858 | 0.024740462 |
| cg19468883 | 12 | - | 121198447 | rs11065286 | 12 | 121271734 | T | C | -0.4743 | 0.131153 | 0.000298808 | -0.4743 | 0.131153 | 0.000298808 | 1 | 0.0273113 | 0.024740462 |
| cg07718303 | 12 | SPPL3 | 121261039 | rs1467283 | 12 | 121210220 | C | G | -0.668962 | 0.178643 | 0.00018067 | -0.668962 | 0.178643 | 0.00018067 | 1 | 0.0143415 | 0.016640256 |
| cg04974751 | 12 | SPPL3 | 121282930 | rs9431 | 12 | 121202664 | A | C | -0.597706 | 0.144603 | 3.58E-05 | -0.597706 | 0.144603 | 3.58E-05 | 1 | 0.0216439 | 0.004476529 |
| cg15656257 | 12 | ABCB9 | 123450216 | rs949142 | 12 | 123634043 | T | C | -0.319375 | 0.0853742 | 0.000183431 | -0.319375 | 0.0853742 | 0.000183431 | 1 | 0.0918264 | 0.016819703 |
| cg23100375 | 12 | ABCB9 | 123450766 | rs1630820 | 12 | 123516917 | C | G | 1.27232 | 0.31373 | 5.01E-05 | 1.27232 | 0.31373 | 5.01E-05 | 1 | 0.00658703 | 0.00585463 |
| cg03297007 | 12 | ABCB9 | 123450869 | rs655293 | 12 | 123528405 | G | A | -0.676004 | 0.170631 | 7.44E-05 | -0.676004 | 0.170631 | 7.44E-05 | 1 | 0.0230678 | 0.008108059 |
| cg22341471 | 12 | ABCB9 | 123451323 | rs7957096 | 12 | 123544878 | A | G | -0.232991 | 0.058206 | 6.26E-05 | -0.232991 | 0.058206 | 6.26E-05 | 1 | 0.163017 | 0.006980906 |
| cg16427983 | 12 | ABCB9 | 123453858 | rs655293 | 12 | 123528405 | G | A | -0.387733 | 0.0978678 | 7.44E-05 | -0.387733 | 0.0978678 | 7.44E-05 | 1 | 0.0703512 | 0.008108059 |
| cg27000386 | 12 | OGFOD2 | 123463006 | rs7957096 | 12 | 123544878 | A | G | 0.717443 | 0.179233 | 6.26E-05 | 0.717443 | 0.179233 | 6.26E-05 | 1 | 0.0171063 | 0.006980906 |
| cg17436506 | 12 | ARL6IP4 | 123463405 | rs7957096 | 12 | 123544878 | A | G | 0.43685 | 0.109134 | 6.26E-05 | 0.43685 | 0.109134 | 6.26E-05 | 1 | 0.0463032 | 0.006980906 |
| cg08934286 | 12 | ARL6IP4 | 123463762 | rs7957096 | 12 | 123544878 | A | G | 1.05748 | 0.264181 | 6.26E-05 | 1.05748 | 0.264181 | 6.26E-05 | 1 | 0.00782328 | 0.006980906 |
| cg02203224 | 12 | ARL6IP4 | 123464087 | rs7957096 | 12 | 123544878 | A | G | 0.202471 | 0.0505815 | 6.26E-05 | 0.202471 | 0.0505815 | 6.26E-05 | 1 | 0.215898 | 0.006980906 |
| cg22237346 | 12 | ARL6IP4 | 123464821 | rs7957096 | 12 | 123544878 | A | G | 1.25239 | 0.312874 | 6.26E-05 | 1.25239 | 0.312874 | 6.26E-05 | 1 | 0.00555055 | 0.006980906 |
| cg26562417 | 12 | ARL6IP4 | 123464823 | rs7957096 | 12 | 123544878 | A | G | 0.503045 | 0.125671 | 6.26E-05 | 0.503045 | 0.125671 | 6.26E-05 | 1 | 0.0348959 | 0.006980906 |
| cg18637761 | 12 | PITPNM2 | 123468780 | rs6488868 | 12 | 123799974 | A | G | 0.938557 | 0.263868 | 0.000375311 | 0.938557 | 0.263868 | 0.000375311 | 1 | 0.00854799 | 0.029811021 |
| cg09931783 | 12 | PITPNM2 | 123469669 | rs1727302 | 12 | 123632930 | G | A | 1.29518 | 0.345396 | 0.000177009 | 1.29518 | 0.345396 | 0.000177009 | 1 | 0.00491286 | 0.01632319 |
| cg05171224 | 12 | PITPNM2 | 123471014 | rs1727313 | 12 | 123640853 | C | G | -0.939143 | 0.234088 | 6.03E-05 | -0.939143 | 0.234088 | 6.03E-05 | 1 | 0.0123994 | 0.006831117 |
| cg05597205 | 12 | PITPNM2 | 123471183 | rs1260294 | 12 | 123560289 | C | T | -0.43556 | 0.120042 | 0.000285242 | -0.43556 | 0.120042 | 0.000285242 | 1 | 0.050262 | 0.023824091 |
| cg14644204 | 12 | PITPNM2 | 123518833 | rs1617156 | 12 | 123590165 | T | C | 0.267256 | 0.0720923 | 0.000209679 | 0.267256 | 0.0720923 | 0.000209679 | 1 | 0.132075 | 0.018811619 |
| cg01816936 | 12 | PITPNM2 | 123518888 | rs937564 | 12 | 123477311 | T | C | 0.759499 | 0.197985 | 0.000125024 | 0.759499 | 0.197985 | 0.000125024 | 1 | 0.0173196 | 0.012465272 |
| cg08176694 | 12 | PITPNM2 | 123519157 | rs1617156 | 12 | 123590165 | T | C | 0.161184 | 0.0434794 | 0.000209679 | 0.163374 | 0.0417724 | 9.19E-05 | 3 | 0.388044 | 0.009709512 |
| cg06415153 | 12 | PITPNM2 | 123519476 | rs1617156 | 12 | 123590165 | T | C | 0.365845 | 0.0986868 | 0.000209679 | 0.365845 | 0.0986868 | 0.000209679 | 1 | 0.0704298 | 0.018811619 |
| cg05132828 | 12 | PITPNM2 | 123560479 | rs4460848 | 12 | 123677810 | A | G | 0.696937 | 0.185256 | 0.000168603 | 0.696937 | 0.185256 | 0.000168603 | 1 | 0.0178352 | 0.015699826 |
| cg01973483 | 12 | PITPNM2 | 123591123 | rs11614406 | 12 | 123682396 | C | T | -0.69772 | 0.188367 | 0.000212244 | -0.69772 | 0.188367 | 0.000212244 | 1 | 0.0174489 | 0.018949184 |
| cg06742321 | 12 | PITPNM2 | 123595122 | rs4148862 | 12 | 123568619 | A | C | -0.294903 | 0.073473 | 5.98E-05 | -0.294903 | 0.073473 | 5.98E-05 | 1 | 0.101567 | 0.006782903 |
| cg19515108 | 12 | - | 123599873 | rs1716174 | 12 | 123660717 | T | C | -0.651383 | 0.174154 | 0.000183874 | -0.651383 | 0.174154 | 0.000183874 | 1 | 0.0233064 | 0.016850811 |
| cg07899411 | 12 | - | 123604434 | rs4148862 | 12 | 123568619 | A | C | -0.312988 | 0.0779787 | 5.98E-05 | -0.312988 | 0.0779787 | 5.98E-05 | 1 | 0.0901563 | 0.006782903 |
| cg15175608 | 12 | - | 123636717 | rs1727318 | 12 | 123621210 | T | C | -0.778983 | 0.20803 | 0.000180755 | -0.778983 | 0.20803 | 0.000180755 | 1 | 0.0155415 | 0.016640256 |
| cg09067021 | 12 | - | 123637556 | rs1727307 | 12 | 123575742 | A | G | 0.846703 | 0.210239 | 5.64E-05 | 0.846703 | 0.210239 | 5.64E-05 | 1 | 0.0122991 | 0.006467854 |
| cg27085265 | 12 | MPHOSPH9 | 123643500 | rs12809602 | 12 | 123768916 | G | T | -1.42286 | 0.363153 | 8.93E-05 | -1.42286 | 0.363153 | 8.93E-05 | 1 | 0.00516884 | 0.009455268 |
| cg11143193 | 12 | - | 123713553 | rs7957096 | 12 | 123544878 | A | G | -1.67404 | 0.41821 | 6.26E-05 | -1.67404 | 0.41821 | 6.26E-05 | 1 | 0.00306486 | 0.006980906 |
| cg16195804 | 12 | C12orf65 | 123717050 | rs9739070 | 12 | 123771032 | A | G | -0.966905 | 0.261858 | 0.000222148 | -0.966905 | 0.261858 | 0.000222148 | 1 | 0.0102816 | 0.019615459 |
| cg22931309 | 12 | C12orf65 | 123718298 | rs4460848 | 12 | 123677810 | A | G | 0.470524 | 0.125072 | 0.000168603 | 0.470524 | 0.125072 | 0.000168603 | 1 | 0.0392489 | 0.015699826 |
| cg10672416 | 12 | C12orf65 | 123718706 | rs2102949 | 12 | 123676763 | G | A | -0.221195 | 0.0589018 | 0.000173174 | -0.221195 | 0.0589018 | 0.000173174 | 1 | 0.177309 | 0.016060935 |
| cg22465824 | 12 | CDK2AP1 | 123746176 | rs4759409 | 12 | 123719585 | G | C | -0.877445 | 0.227959 | 0.00011858 | -0.877445 | 0.227959 | 0.00011858 | 1 | 0.0130464 | 0.01196256 |
| cg13189671 | 12 | CDK2AP1 | 123750782 | rs10772998 | 12 | 123721177 | T | G | -0.707759 | 0.18247 | 0.000105024 | -0.707759 | 0.18247 | 0.000105024 | 1 | 0.0203789 | 0.010900261 |
| cg00585698 | 12 | CDK2AP1 | 123750864 | rs2682426 | 12 | 123653556 | C | T | -0.426346 | 0.112 | 0.000140904 | -0.426346 | 0.112 | 0.000140904 | 1 | 0.0537559 | 0.013647417 |
| cg13421247 | 12 | CDK2AP1 | 123756945 | rs1727319 | 12 | 123701353 | T | C | -0.550441 | 0.146479 | 0.000171449 | -0.550441 | 0.146479 | 0.000171449 | 1 | 0.0287144 | 0.015912132 |
| cg13127506 | 12 | CDK2AP1 | 123757018 | rs4460848 | 12 | 123677810 | A | G | -0.348236 | 0.0925664 | 0.000168603 | -0.348236 | 0.0925664 | 0.000168603 | 1 | 0.0717372 | 0.015699826 |
| cg02338538 | 12 | CDK2AP1 | 123757892 | rs1060105 | 12 | 123806219 | T | C | 0.820382 | 0.214061 | 0.00012691 | 0.820382 | 0.214061 | 0.00012691 | 1 | 0.0149679 | 0.012599042 |
| cg18603577 | 12 | RILPL2 | 123900102 | rs4759409 | 12 | 123719585 | G | C | -0.716055 | 0.18603 | 0.00011858 | -0.716055 | 0.18603 | 0.00011858 | 1 | 0.0196449 | 0.01196256 |
| cg07534892 | 12 | - | 123930117 | rs6488868 | 12 | 123799974 | A | G | -1.08176 | 0.304127 | 0.000375311 | -1.08176 | 0.304127 | 0.000375311 | 1 | 0.00641067 | 0.029811021 |
| cg13984040 | 12 | - | 125258948 | rs838879 | 12 | 125261441 | G | A | -0.490018 | 0.109808 | 8.11E-06 | -0.490018 | 0.109808 | 8.11E-06 | 1 | 0.0431369 | 0.001317049 |
| cg15174393 | 12 | - | 125259081 | rs838879 | 12 | 125261441 | G | A | -0.404348 | 0.0906101 | 8.11E-06 | -0.404348 | 0.0906101 | 8.11E-06 | 1 | 0.0633905 | 0.001317049 |
| cg14849578 | 12 | SCARB1 | 125282480 | rs3782287 | 12 | 125289265 | A | G | -0.19919 | 0.0529688 | 0.000169611 | -0.21688 | 0.0610938 | 0.000385381 | 2 | 0.17205 | 0.030357163 |
| cg25283432 | 12 | SCARB1 | 125282561 | rs3782287 | 12 | 125289265 | A | G | -0.234832 | 0.0624466 | 0.000169611 | -0.255665 | 0.0756793 | 0.000729554 | 2 | 0.122832 | 0.049362746 |
| cg11198639 | 12 | SCARB1 | 125287476 | rs3782287 | 12 | 125289265 | A | G | -0.0987238 | 0.0262527 | 0.000169611 | -0.0914358 | 0.026303 | 0.000508568 | 2 | 0.699225 | 0.037527348 |
| cg11192877 | 12 | SCARB1 | 125287607 | rs3782287 | 12 | 125289265 | A | G | -0.0985549 | 0.0262077 | 0.000169611 | -0.0916824 | 0.0260191 | 0.000425733 | 2 | 0.6985 | 0.032632849 |
| cg01663970 | 12 | SCARB1 | 125299686 | rs838909 | 12 | 125287648 | A | G | -0.61651 | 0.173173 | 0.000370835 | -0.562632 | 0.132796 | 2.27E-05 | 2 | 0.0256978 | 0.003057054 |
| cg03818583 | 13 | ATP5EP2 | 28519319 | rs9579135 | 13 | 28533738 | G | A | -0.256842 | 0.0699509 | 0.000240957 | -0.256842 | 0.0699509 | 0.000240957 | 1 | 0.113818 | 0.020889426 |
| cg09940377 | 13 | - | 28534873 | rs3742110 | 13 | 28539186 | A | G | -0.826568 | 0.238525 | 0.000529665 | -0.826568 | 0.238525 | 0.000529665 | 1 | 0.0101985 | 0.038531465 |
| cg05222982 | 13 | - | 28545214 | rs7332842 | 13 | 28531818 | A | G | 0.559885 | 0.15605 | 0.000333481 | 0.559885 | 0.15605 | 0.000333481 | 1 | 0.022976 | 0.027072037 |
| cg04821933 | 13 | POMP | 29232799 | rs7989738 | 13 | 29236034 | G | A | -0.496249 | 0.138071 | 0.000325522 | -0.496249 | 0.138071 | 0.000325522 | 1 | 0.0513993 | 0.026532252 |
| cg00618312 | 13 | ELF1 | 41556559 | rs2017696 | 13 | 41387065 | T | A | 0.460035 | 0.158026 | 0.003601278 | 0.723189 | 0.19327 | 0.000182716 | 3 | 0.174416 | 0.01677317 |
| cg24867247 | 13 | - | 46964256 | rs1408184 | 13 | 46946157 | T | C | 0.338945 | 0.0946409 | 0.000341861 | 0.338945 | 0.0946409 | 0.000341861 | 1 | 0.0591481 | 0.027559124 |
| cg11805587 | 13 | C13orf1 | 50507883 | rs9596215 | 13 | 50527565 | A | G | -0.728099 | 0.197235 | 0.00022297 | -0.728099 | 0.197235 | 0.00022297 | 1 | 0.0162399 | 0.019634561 |
| cg09145126 | 13 | TRIM13 | 50570018 | rs9596219 | 13 | 50563447 | T | C | 0.717145 | 0.195567 | 0.000245466 | 0.717145 | 0.195567 | 0.000245466 | 1 | 0.0168411 | 0.021155907 |
| cg23213230 | 13 | TRIM13 | 50570091 | rs4942901 | 13 | 50548415 | T | C | 0.52923 | 0.144226 | 0.000243125 | 0.52923 | 0.144226 | 0.000243125 | 1 | 0.0304973 | 0.021021188 |
| cg24030370 | 13 | TRIM13 | 50570142 | rs2740544 | 13 | 50617640 | C | A | 0.540881 | 0.147614 | 0.000248225 | 0.540881 | 0.147614 | 0.000248225 | 1 | 0.0299342 | 0.021336935 |
| cg22243583 | 13 | DLEU1 | 50656529 | rs9596215 | 13 | 50527565 | A | G | -0.513796 | 0.139182 | 0.00022297 | -0.513796 | 0.139182 | 0.00022297 | 1 | 0.0327107 | 0.019634561 |
| cg21548464 | 13 | - | 50707937 | rs2066591 | 13 | 50708904 | C | T | -0.851047 | 0.219365 | 0.000104671 | -0.851047 | 0.219365 | 0.000104671 | 1 | 0.0134217 | 0.010870604 |
| cg02217184 | 13 | GPR18 | 99907419 | rs12877480 | 13 | 100002818 | C | G | -0.871169 | 0.208561 | 2.96E-05 | -0.871169 | 0.208561 | 2.96E-05 | 1 | 0.0167713 | 0.003844394 |
| cg10091709 | 13 | UBAC2 | 100003011 | rs12877480 | 13 | 100002818 | C | G | -0.400517 | 0.0958855 | 2.96E-05 | -0.400517 | 0.0958855 | 2.96E-05 | 1 | 0.0797538 | 0.003844394 |
| cg18560638 | 13 | UBAC2 | 100008200 | rs142654340 | 13 | 99823155 | T | G | 0.784448 | 0.218677 | 0.000334265 | 0.784448 | 0.218677 | 0.000334265 | 1 | 0.0435804 | 0.027108598 |
| cg13561518 | 14 | - | 22336334 | rs12434054 | 14 | 22221211 | G | A | -1.08288 | 0.320622 | 0.000731756 | -1.08288 | 0.320622 | 0.000731756 | 1 | 0.0885485 | 0.049449827 |
| cg10561989 | 14 | C14orf19 | 35408569 | rs12892117 | 14 | 35422503 | T | C | 1.2923 | 0.26869 | 1.51E-06 | 1.2923 | 0.26869 | 1.51E-06 | 1 | 0.011913 | 0.00033126 |
| cg07552068 | 14 | SRP54 | 35452353 | rs12891473 | 14 | 35452257 | T | C | 0.892844 | 0.253539 | 0.00042916 | 0.892844 | 0.253539 | 0.00042916 | 1 | 0.00734457 | 0.032848969 |
| cg26250106 | 14 | SRP54 | 35452420 | rs12891473 | 14 | 35452257 | T | C | 1.08684 | 0.308627 | 0.00042916 | 1.08684 | 0.308627 | 0.00042916 | 1 | 0.00492923 | 0.032848969 |
| cg24733384 | 14 | FAM177A1 | 35516283 | rs79698726 | 14 | 35522350 | C | A | -0.104598 | 0.0369178 | 0.004607744 | -0.141001 | 0.0321574 | 1.16E-05 | 7 | 0.917532 | 0.001747976 |
| cg16556633 | 14 | DAAM1 | 59815883 | rs12878070 | 14 | 59819674 | G | T | 0.229459 | 0.0673255 | 0.000654025 | 0.283927 | 0.0822266 | 0.000554529 | 2 | 0.185329 | 0.039830983 |
| cg16007772 | 14 | C14orf149 | 59950363 | rs12890494 | 14 | 59906030 | T | C | -0.353969 | 0.103561 | 0.000630957 | -0.353969 | 0.103561 | 0.000630957 | 1 | 0.0452299 | 0.044052076 |
| cg18825221 | 14 | RAD51L1 | 68749962 | rs3784099 | 14 | 68749927 | A | G | 0.175411 | 0.021056 | 8.13E-17 | 0.150541 | 0.0242358 | 5.27E-10 | 9 | 1.90442 | 3.12E-07 |
| cg04384914 | 14 | RAD51L1 | 68759670 | rs1810623 | 14 | 68805725 | T | C | 0.749675 | 0.15705 | 1.81E-06 | 0.749675 | 0.15705 | 1.81E-06 | 1 | 0.030954 | 0.000385692 |
| cg13572771 | 14 | RAD51L1 | 68871428 | rs12889770 | 14 | 68871549 | A | G | 0.647125 | 0.148682 | 1.35E-05 | 0.647125 | 0.148682 | 1.35E-05 | 1 | 0.0367347 | 0.001952345 |
| cg23526087 | 14 | RAD51L1 | 68973466 | rs4325481 | 14 | 68900261 | A | C | 0.675399 | 0.1609 | 2.70E-05 | 0.675399 | 0.1609 | 2.70E-05 | 1 | 0.018508 | 0.00355134 |
| cg07574163 | 14 | - | 77498976 | rs17105195 | 14 | 77499279 | A | G | -0.253493 | 0.078424 | 0.001227955 | -0.275858 | 0.0765315 | 0.000312831 | 2 | 0.17147 | 0.025652609 |
| cg04925858 | 14 | - | 77499547 | rs17105195 | 14 | 77499279 | A | G | -0.221076 | 0.0683952 | 0.001227955 | -0.239037 | 0.0666403 | 0.000334622 | 2 | 0.166548 | 0.027110418 |
| cg12789086 | 14 | KIAA1737 | 77565004 | rs57939968 | 14 | 77566675 | T | C | -0.440797 | 0.129449 | 0.000661287 | -0.440797 | 0.129449 | 0.000661287 | 1 | 0.0457101 | 0.045758525 |
| cg09974016 | 14 | - | 77591203 | rs2661830 | 14 | 77574994 | G | A | -0.569267 | 0.167002 | 0.000652746 | -0.569267 | 0.167002 | 0.000652746 | 1 | 0.0257934 | 0.045300202 |
| cg01098812 | 14 | - | 77591726 | rs2661830 | 14 | 77574994 | G | A | -0.595872 | 0.174807 | 0.000652746 | -0.595872 | 0.174807 | 0.000652746 | 1 | 0.023533 | 0.045300202 |
| cg08112724 | 14 | KCNK10 | 88788364 | rs10141646 | 14 | 88799607 | A | C | 0.517889 | 0.181617 | 0.004350911 | 0.508405 | 0.144476 | 0.000433317 | 2 | 0.0452379 | 0.033042335 |
| cg03345232 | 14 | RIN3 | 92981121 | rs67641625 | 14 | 93016079 | T | C | -0.17852 | 0.0388634 | 4.36E-06 | -0.177027 | 0.0387654 | 4.96E-06 | 2 | 0.338441 | 0.000894113 |
| cg12072028 | 14 | RIN3 | 92981227 | rs67641625 | 14 | 93016079 | T | C | -0.179145 | 0.0389994 | 4.36E-06 | -0.201812 | 0.0597853 | 0.000736625 | 3 | 0.364473 | 0.049668362 |
| cg02268192 | 14 | RIN3 | 92981666 | rs7157029 | 14 | 93017566 | A | G | -0.56407 | 0.122937 | 4.47E-06 | -0.56407 | 0.122937 | 4.47E-06 | 1 | 0.0336571 | 0.000826019 |
| cg04718702 | 14 | RIN3 | 93020195 | rs67641625 | 14 | 93016079 | T | C | -0.387644 | 0.084389 | 4.36E-06 | -0.387644 | 0.084389 | 4.36E-06 | 1 | 0.0712091 | 0.000810121 |
| cg25992382 | 14 | RIN3 | 93066811 | rs745381 | 14 | 93014489 | T | C | -0.458044 | 0.0991489 | 3.85E-06 | -0.458044 | 0.0991489 | 3.85E-06 | 1 | 0.0509999 | 0.000727529 |
| cg23625388 | 14 | RIN3 | 93076432 | rs9671271 | 14 | 93071337 | T | C | 0.309797 | 0.0761002 | 4.69E-05 | 0.309797 | 0.0761002 | 4.69E-05 | 1 | 0.0806279 | 0.0055647 |
| ch.14.1488981R | 14 | RIN3 | 93077342 | rs9671271 | 14 | 93071337 | T | C | 0.154397 | 0.037927 | 4.69E-05 | 0.148361 | 0.0372365 | 6.77E-05 | 3 | 0.34998 | 0.007447284 |
| cg20934105 | 14 | RIN3 | 93118717 | rs7157029 | 14 | 93017566 | A | G | 1.13731 | 0.247873 | 4.47E-06 | 1.13731 | 0.247873 | 4.47E-06 | 1 | 0.00821804 | 0.000826019 |
| cg02238526 | 14 | DYNC1H1 | 102516429 | rs146420706 | 14 | 102710139 | T | C | 1.0245 | 0.205976 | 6.57E-07 | 1.0245 | 0.205976 | 6.57E-07 | 1 | 0.161529 | 0.000160955 |
| cg25043643 | 14 | WDR20 | 102609274 | rs146945730 | 14 | 102741260 | T | C | -0.306334 | 0.0634746 | 1.39E-06 | -0.30413 | 0.0600619 | 4.12E-07 | 2 | 1.6747 | 0.000107065 |
| cg06819357 | 14 | TECPR2 | 102928437 | rs145407272 | 14 | 102899169 | T | C | 0.225652 | 0.0535505 | 2.51E-05 | 0.22341 | 0.0491994 | 5.61E-06 | 3 | 1.73421 | 0.000982063 |
| cg04715649 | 14 | CDC42BPB | 103416122 | rs7156191 | 14 | 103297847 | C | G | -1.08305 | 0.255505 | 2.25E-05 | -1.08305 | 0.255505 | 2.25E-05 | 1 | 0.012603 | 0.003034306 |
| cg10422233 | 14 | C14orf73 | 103565915 | rs61462345 | 14 | 103564935 | G | C | -0.797971 | 0.0617518 | 3.50E-38 | -0.797971 | 0.0617518 | 3.50E-38 | 1 | 0.156651 | 6.30E-34 |
| cg01104208 | 14 | C14orf73 | 103566172 | rs59643720 | 14 | 103564807 | C | A | -0.916253 | 0.0708083 | 2.78E-38 | -0.916253 | 0.0708083 | 2.78E-38 | 1 | 0.119153 | 6.30E-34 |
| cg22502625 | 14 | C14orf73 | 103568366 | rs11628185 | 14 | 103563421 | A | G | -0.737307 | 0.0741742 | 2.84E-23 | -0.737307 | 0.0741742 | 2.84E-23 | 1 | 0.085197 | 1.39E-19 |
| cg05763097 | 14 | C14orf73 | 103569340 | rs61462345 | 14 | 103564935 | G | C | 1.18465 | 0.091675 | 3.50E-38 | 1.18465 | 0.091675 | 3.50E-38 | 1 | 0.0710194 | 6.30E-34 |
| cg21143587 | 14 | C14orf73 | 103569397 | rs61462345 | 14 | 103564935 | G | C | 1.0632 | 0.0822769 | 3.50E-38 | 1.0632 | 0.0822769 | 3.50E-38 | 1 | 0.0881961 | 6.30E-34 |
| cg10409043 | 14 | C14orf73 | 103570024 | rs61462345 | 14 | 103564935 | G | C | 0.956858 | 0.0740474 | 3.50E-38 | 0.956858 | 0.0740474 | 3.50E-38 | 1 | 0.108908 | 6.30E-34 |
| cg11842450 | 14 | C14orf73 | 103576463 | rs59643720 | 14 | 103564807 | C | A | -1.27505 | 0.0985365 | 2.78E-38 | -0.471349 | 0.134467 | 0.000456171 | 6 | 0.74986 | 0.034396771 |
| cg13798721 | 14 | ADSSL1 | 105190477 | rs2582533 | 14 | 105398787 | G | C | -0.881788 | 0.221825 | 7.04E-05 | -0.881788 | 0.221825 | 7.04E-05 | 1 | 0.00955463 | 0.007697165 |
| cg26203845 | 14 | - | 105293866 | rs11851053 | 14 | 105407208 | T | C | -0.571544 | 0.150156 | 0.00014109 | -0.571544 | 0.150156 | 0.00014109 | 1 | 0.020575 | 0.013647417 |
| cg16793370 | 14 | - | 105371541 | rs11851053 | 14 | 105407208 | T | C | 0.510965 | 0.134241 | 0.00014109 | 0.510965 | 0.134241 | 0.00014109 | 1 | 0.0257614 | 0.013647417 |
| cg15352829 | 14 | PLD4 | 105391018 | rs10083490 | 14 | 105402418 | C | T | 0.189165 | 0.046806 | 5.31E-05 | 0.186855 | 0.0453863 | 3.84E-05 | 2 | 0.264173 | 0.00476386 |
| cg18875357 | 14 | PLD4 | 105391263 | rs10083490 | 14 | 105402418 | C | T | 0.401459 | 0.099335 | 5.31E-05 | 0.401459 | 0.099335 | 5.31E-05 | 1 | 0.0470696 | 0.006158318 |
| cg27394566 | 14 | PLD4 | 105391635 | rs11623422 | 14 | 105407031 | A | G | 0.135432 | 0.0355807 | 0.00014109 | 0.142129 | 0.0348634 | 4.57E-05 | 2 | 0.42007 | 0.005458795 |
| cg21012737 | 14 | PLD4 | 105393171 | rs11851053 | 14 | 105407208 | T | C | -0.465163 | 0.122208 | 0.00014109 | -0.465163 | 0.122208 | 0.00014109 | 1 | 0.0310997 | 0.013647417 |
| cg08187585 | 14 | PLD4 | 105393182 | rs28600075 | 14 | 105408315 | T | C | -0.725851 | 0.189184 | 0.000124724 | -0.725851 | 0.189184 | 0.000124724 | 1 | 0.0129326 | 0.012449688 |
| cg20145009 | 14 | PLD4 | 105399175 | rs11623422 | 14 | 105407031 | A | G | -0.207831 | 0.0546014 | 0.00014109 | -0.21105 | 0.0526249 | 6.06E-05 | 2 | 0.197009 | 0.006836126 |
| cg20978937 | 14 | PLD4 | 105399321 | rs11623422 | 14 | 105407031 | A | G | -0.202698 | 0.0532528 | 0.00014109 | -0.19803 | 0.0512955 | 0.000113162 | 2 | 0.213132 | 0.011509117 |
| cg21017887 | 14 | - | 105400489 | rs28600075 | 14 | 105408315 | T | C | -0.241163 | 0.0628562 | 0.000124724 | -0.258064 | 0.0621934 | 3.34E-05 | 2 | 0.154636 | 0.004218343 |
| cg16097532 | 14 | AHNAK2 | 105416166 | rs4465542 | 14 | 105407798 | T | C | -0.194674 | 0.051319 | 0.000148637 | -0.202054 | 0.0496014 | 4.63E-05 | 2 | 0.223007 | 0.00551452 |
| cg22796749 | 14 | - | 105512071 | rs35156277 | 14 | 105510475 | C | T | 0.8381 | 0.241821 | 0.000528773 | 0.8381 | 0.241821 | 0.000528773 | 1 | 0.0310091 | 0.03850991 |
| cg00684283 | 14 | CRIP2 | 105943425 | rs11160825 | 14 | 105410411 | C | T | -0.860163 | 0.226045 | 0.000141698 | -0.860163 | 0.226045 | 0.000141698 | 1 | 0.00909617 | 0.013698065 |
| cg06285241 | 14 | CRIP2 | 105944655 | rs11850949 | 14 | 105408827 | A | C | -1.02272 | 0.270241 | 0.000154077 | -1.02272 | 0.270241 | 0.000154077 | 1 | 0.00640287 | 0.014701903 |
| cg15385345 | 15 | - | 40779019 | rs2412534 | 15 | 40836119 | C | T | 0.315989 | 0.0921993 | 0.000609842 | 0.315989 | 0.0921993 | 0.000609842 | 1 | 0.0586399 | 0.042855942 |
| cg26228859 | 15 | - | 40802888 | rs2412534 | 15 | 40836119 | C | T | 0.283198 | 0.0826313 | 0.000609842 | 0.283198 | 0.0826313 | 0.000609842 | 1 | 0.0730283 | 0.042855942 |
| cg20551756 | 15 | - | 40803416 | rs2412534 | 15 | 40836119 | C | T | -0.522796 | 0.152541 | 0.000609842 | -0.522796 | 0.152541 | 0.000609842 | 1 | 0.0213769 | 0.042855942 |
| cg19698348 | 15 | - | 40803733 | rs2412534 | 15 | 40836119 | C | T | -1.00637 | 0.293637 | 0.000609842 | -1.00637 | 0.293637 | 0.000609842 | 1 | 0.00571498 | 0.042855942 |
| cg00211489 | 15 | MRPL42P5 | 40826026 | rs2412525 | 15 | 40867122 | T | A | 0.631535 | 0.153178 | 3.74E-05 | 0.631535 | 0.153178 | 3.74E-05 | 1 | 0.0199173 | 0.00465793 |
| cg13940929 | 15 | - | 40829048 | rs62019876 | 15 | 40869650 | G | A | 0.773277 | 0.190797 | 5.06E-05 | 0.773277 | 0.190797 | 5.06E-05 | 1 | 0.0128365 | 0.005899356 |
| cg17140476 | 15 | C15orf57 | 40846280 | rs11632370 | 15 | 40838109 | G | T | 0.625106 | 0.154597 | 5.27E-05 | 0.625106 | 0.154597 | 5.27E-05 | 1 | 0.0207252 | 0.006110807 |
| cg03605064 | 15 | CASC5 | 40886247 | rs12912635 | 15 | 40923173 | T | G | 0.483936 | 0.129638 | 0.000189282 | 0.483936 | 0.129638 | 0.000189282 | 1 | 0.0292358 | 0.017278057 |
| cg27659014 | 15 | CASC5 | 40886649 | rs12912635 | 15 | 40923173 | T | G | 0.228236 | 0.0611404 | 0.000189282 | 0.228236 | 0.0611404 | 0.000189282 | 1 | 0.131708 | 0.017278057 |
| cg22945957 | 15 | PSTPIP1 | 77323565 | rs16968665 | 15 | 77380717 | C | G | 0.408985 | 0.108583 | 0.000165566 | 0.408985 | 0.108583 | 0.000165566 | 1 | 0.0463665 | 0.015497159 |
| cg20575191 | 15 | PSTPIP1 | 77324607 | rs16968665 | 15 | 77380717 | C | G | 0.193483 | 0.0513685 | 0.000165566 | 0.181053 | 0.0497654 | 0.000274688 | 2 | 0.228035 | 0.023205634 |
| cg17529965 | 15 | PSTPIP1 | 77327887 | rs16968665 | 15 | 77380717 | C | G | 0.147576 | 0.0391807 | 0.000165566 | 0.140344 | 0.0363194 | 0.000111513 | 5 | 0.467632 | 0.011384207 |
| cg20059407 | 15 | CTSH | 79234318 | rs11638844 | 15 | 79231518 | A | G | 0.444426 | 0.0888393 | 5.67E-07 | 0.444426 | 0.0888393 | 5.67E-07 | 1 | 0.0689869 | 0.000141747 |
| cg08619515 | 16 | CLEC16A | 11066157 | rs16958021 | 16 | 11170047 | G | A | -0.997536 | 0.106216 | 6.01E-21 | -1.01497 | 0.0914006 | 1.22E-28 | 2 | 0.137434 | 1.04E-24 |
| cg27227804 | 16 | CLEC16A | 11085972 | rs7403919 | 16 | 11085968 | C | T | -0.790114 | 0.0888703 | 6.16E-19 | -0.790114 | 0.0888703 | 6.16E-19 | 1 | 0.0688697 | 1.75E-15 |
| cg01690625 | 16 | CLEC16A | 11176108 | rs17806056 | 16 | 11192499 | A | T | 1.10593 | 0.285912 | 0.000109736 | 1.10593 | 0.285912 | 0.000109736 | 1 | 0.00882967 | 0.011209844 |
| cg01238858 | 16 | CLEC16A | 11202693 | rs9921287 | 16 | 11209739 | C | T | 0.901092 | 0.130208 | 4.53E-12 | 0.901092 | 0.130208 | 4.53E-12 | 1 | 0.0285667 | 4.04E-09 |
| cg10390979 | 16 | CLEC16A | 11215351 | rs34306440 | 16 | 11215035 | G | A | 0.377379 | 0.0964044 | 9.06E-05 | 0.377379 | 0.0964044 | 9.06E-05 | 1 | 0.0858377 | 0.009588622 |
| cg16457876 | 16 | CLEC16A | 11219446 | rs4322688 | 16 | 11238991 | G | C | -1.48364 | 0.166446 | 5.01E-19 | -1.35323 | 0.192767 | 2.23E-12 | 1 | 0.0128723 | 2.03E-09 |
| cg07486170 | 16 | CLEC16A | 11221455 | rs6498168 | 16 | 11235130 | T | G | -0.794656 | 0.166275 | 1.76E-06 | -0.794656 | 0.166275 | 1.76E-06 | 1 | 0.0193741 | 0.000376936 |
| cg03217729 | 16 | CLEC16A | 11222890 | rs12935657 | 16 | 11219041 | A | G | 0.825279 | 0.219787 | 0.000173467 | 0.825279 | 0.219787 | 0.000173467 | 1 | 0.0147223 | 0.016078911 |
| cg02548199 | 16 | CLEC16A | 11264705 | rs41359 | 16 | 11265121 | A | G | 0.98058 | 0.262315 | 0.000185419 | 0.98058 | 0.262315 | 0.000185419 | 1 | 0.00737535 | 0.016973229 |
| cg06150195 | 16 | CLEC16A | 11275874 | rs77615775 | 16 | 11254578 | C | T | -0.358215 | 0.0781411 | 4.56E-06 | -0.358215 | 0.0781411 | 4.56E-06 | 1 | 0.236418 | 0.000838491 |
| cg08493063 | 16 | - | 11330934 | rs9928526 | 16 | 11437518 | C | T | 0.961028 | 0.228264 | 2.55E-05 | 0.961028 | 0.228264 | 2.55E-05 | 1 | 0.00927332 | 0.00339313 |
| cg08895311 | 16 | - | 11345608 | rs11645592 | 16 | 11371310 | T | C | 0.896426 | 0.236087 | 0.000146494 | 0.896426 | 0.236087 | 0.000146494 | 1 | 0.00989206 | 0.014094452 |
| cg10784813 | 16 | SOCS1 | 11348678 | rs72773819 | 16 | 11406792 | A | C | 1.22304 | 0.17029 | 6.91E-13 | 1.22304 | 0.17029 | 6.91E-13 | 1 | 0.0290072 | 6.88E-10 |
| cg04004558 | 16 | SOCS1 | 11348684 | rs6498184 | 16 | 11435990 | T | C | 1.3328 | 0.189644 | 2.11E-12 | 1.3328 | 0.189644 | 2.11E-12 | 1 | 0.0235245 | 1.93E-09 |
| cg27540841 | 16 | SOCS1 | 11350112 | rs7196694 | 16 | 11355364 | T | C | 0.354112 | 0.102031 | 0.000519305 | 0.354112 | 0.102031 | 0.000519305 | 1 | 0.0513797 | 0.038059729 |
| cg12642006 | 16 | SOCS1 | 11350118 | rs7196694 | 16 | 11355364 | T | C | 0.297579 | 0.0857417 | 0.000519305 | 0.297579 | 0.0857417 | 0.000519305 | 1 | 0.0727932 | 0.038059729 |
| cg05701125 | 16 | SOCS1 | 11351106 | rs9928526 | 16 | 11437518 | C | T | 0.372422 | 0.0884577 | 2.55E-05 | 0.372422 | 0.0884577 | 2.55E-05 | 1 | 0.0621607 | 0.00339313 |
| cg04289163 | 16 | SOCS1 | 11351165 | rs1532303 | 16 | 11409841 | C | T | 1.15209 | 0.273688 | 2.56E-05 | 1.15209 | 0.273688 | 2.56E-05 | 1 | 0.00630615 | 0.003400508 |
| cg04609482 | 16 | SOCS1 | 11351169 | rs56069754 | 16 | 11362640 | A | G | 0.412186 | 0.0763488 | 6.73E-08 | 0.412186 | 0.0763488 | 6.73E-08 | 1 | 0.102407 | 2.23E-05 |
| cg05902273 | 16 | SOCS1 | 11351199 | rs56069754 | 16 | 11362640 | A | G | 0.834823 | 0.154633 | 6.73E-08 | 0.834823 | 0.154633 | 6.73E-08 | 1 | 0.0248919 | 2.23E-05 |
| cg06459913 | 16 | TNP2 | 11361823 | rs171471 | 16 | 11355450 | A | G | 1.37876 | 0.170903 | 7.25E-16 | 1.34904 | 0.172015 | 4.45E-15 | 1 | 0.0159103 | 6.81E-12 |
| cg21458041 | 16 | TNP2 | 11364014 | rs243330 | 16 | 11350991 | T | C | -0.672398 | 0.0857365 | 4.45E-15 | -0.727771 | 0.173889 | 2.85E-05 | 2 | 0.0706846 | 0.003723364 |
| cg01456572 | 16 | PRM3 | 11367459 | rs12923756 | 16 | 11359675 | C | T | 1.27462 | 0.160273 | 1.84E-15 | 1.27462 | 0.160273 | 1.84E-15 | 1 | 0.0181833 | 3.18E-12 |
| cg01381613 | 16 | PRM3 | 11367491 | rs12923756 | 16 | 11359675 | C | T | 0.808213 | 0.101626 | 1.84E-15 | 0.808213 | 0.101626 | 1.84E-15 | 1 | 0.0453331 | 3.18E-12 |
| cg01046376 | 16 | PRM3 | 11367509 | rs243330 | 16 | 11350991 | T | C | 1.12535 | 0.143492 | 4.45E-15 | 1.12535 | 0.143492 | 4.45E-15 | 1 | 0.0228968 | 6.81E-12 |
| cg27106950 | 16 | PRM3 | 11367916 | rs2301365 | 16 | 11375286 | T | G | -0.792558 | 0.206053 | 0.000119916 | -0.792558 | 0.206053 | 0.000119916 | 1 | 0.0129214 | 0.012069465 |
| cg01281993 | 16 | - | 11374090 | rs1646026 | 16 | 11382695 | T | C | -1.14724 | 0.183244 | 3.85E-10 | -1.14724 | 0.183244 | 3.85E-10 | 1 | 0.0221475 | 2.38E-07 |
| cg03200631 | 16 | PRM1 | 11375333 | rs11645592 | 16 | 11371310 | T | C | 0.426356 | 0.112287 | 0.000146494 | 0.426356 | 0.112287 | 0.000146494 | 1 | 0.0441289 | 0.014094452 |
| cg05385299 | 16 | PRM1 | 11376309 | rs430966 | 16 | 11389482 | T | C | -1.19965 | 0.193807 | 6.04E-10 | -1.19965 | 0.193807 | 6.04E-10 | 1 | 0.0199259 | 3.45E-07 |
| cg07312240 | 16 | - | 11406995 | rs28502009 | 16 | 11426541 | A | G | 0.839378 | 0.153125 | 4.22E-08 | 0.839378 | 0.153125 | 4.22E-08 | 1 | 0.0228582 | 1.50E-05 |
| cg02021288 | 16 | - | 11435867 | rs6498184 | 16 | 11435990 | T | C | 0.513858 | 0.0731169 | 2.11E-12 | 0.476884 | 0.0794087 | 1.92E-09 | 2 | 0.194896 | 9.92E-07 |
| cg00044050 | 16 | C16orf75 | 11439710 | rs171470 | 16 | 11385964 | C | A | -0.169222 | 0.023521 | 6.31E-13 | -0.200674 | 0.0472565 | 2.17E-05 | 4 | 1.11352 | 0.002942883 |
| cg04635642 | 16 | SNX29 | 12183938 | rs350279 | 16 | 12232235 | G | T | 0.144137 | 0.0601443 | 0.01655184 | 0.23155 | 0.0674484 | 0.000597046 | 4 | 0.37881 | 0.042266974 |
| cg19423311 | 16 | IL21R | 27413904 | rs7190377 | 16 | 27410130 | T | A | -0.233843 | 0.0551407 | 2.23E-05 | -0.267664 | 0.0669701 | 6.42E-05 | 2 | 0.231743 | 0.007118702 |
| cg16454902 | 16 | IL21R | 27414272 | rs7190377 | 16 | 27410130 | T | A | -0.356711 | 0.0841131 | 2.23E-05 | -0.356711 | 0.0841131 | 2.23E-05 | 1 | 0.0753684 | 0.003010263 |
| cg02513379 | 16 | IL21R | 27414281 | rs1119132 | 16 | 27403469 | A | G | -1.05926 | 0.171516 | 6.61E-10 | -1.05926 | 0.171516 | 6.61E-10 | 1 | 0.0364388 | 3.76E-07 |
| cg00050618 | 16 | IL21R | 27414418 | rs1859308 | 16 | 27397998 | A | G | 0.634793 | 0.108997 | 5.76E-09 | 0.634793 | 0.108997 | 5.76E-09 | 1 | 0.08619 | 2.72E-06 |
| cg02787852 | 16 | IL21R | 27414536 | rs1116973 | 16 | 27405916 | A | T | -1.19803 | 0.30142 | 7.05E-05 | -1.19803 | 0.30142 | 7.05E-05 | 1 | 0.00536568 | 0.007699253 |
| cg08282819 | 16 | IL21R | 27437900 | rs9933895 | 16 | 27403673 | C | T | -1.37628 | 0.227362 | 1.42E-09 | -1.37628 | 0.227362 | 1.42E-09 | 1 | 0.0209572 | 7.57E-07 |
| cg02621030 | 16 | - | 29151700 | rs252308 | 16 | 29221318 | T | G | -0.340402 | 0.0796924 | 1.94E-05 | -0.340402 | 0.0796924 | 1.94E-05 | 1 | 0.0730166 | 0.002681342 |
| cg09602020 | 16 | - | 29188796 | rs252308 | 16 | 29221318 | T | G | -0.645131 | 0.151033 | 1.94E-05 | -0.645131 | 0.151033 | 1.94E-05 | 1 | 0.0202762 | 0.002681342 |
| cg00416710 | 16 | - | 29196027 | rs252308 | 16 | 29221318 | T | G | -1.35554 | 0.31735 | 1.94E-05 | -1.35554 | 0.31735 | 1.94E-05 | 1 | 0.00452989 | 0.002681342 |
| cg02329193 | 16 | - | 29196472 | rs252308 | 16 | 29221318 | T | G | -0.271624 | 0.0635906 | 1.94E-05 | -0.271624 | 0.0635906 | 1.94E-05 | 1 | 0.114736 | 0.002681342 |
| cg08330132 | 16 | - | 29232139 | rs252308 | 16 | 29221318 | T | G | 0.263765 | 0.0617507 | 1.94E-05 | 0.263765 | 0.0617507 | 1.94E-05 | 1 | 0.121681 | 0.002681342 |
| cg06509391 | 16 | - | 29266713 | rs252308 | 16 | 29221318 | T | G | 0.600506 | 0.140586 | 1.94E-05 | 0.600506 | 0.140586 | 1.94E-05 | 1 | 0.0234142 | 0.002681342 |
| cg08916477 | 16 | SEPT1 | 30391350 | rs12446288 | 16 | 30388709 | A | G | 0.325469 | 0.0936446 | 0.000509851 | 0.342482 | 0.0902874 | 0.000148744 | 2 | 0.163004 | 0.014293982 |
| cg19289461 | 16 | SEPT1 | 30394812 | rs12446288 | 16 | 30388709 | A | G | 0.461639 | 0.132824 | 0.000509851 | 0.461639 | 0.132824 | 0.000509851 | 1 | 0.0289483 | 0.037553626 |
| cg01392867 | 16 | ZNF48 | 30410429 | rs12446288 | 16 | 30388709 | A | G | -0.767892 | 0.22094 | 0.000509851 | -0.767892 | 0.22094 | 0.000509851 | 1 | 0.0104115 | 0.037553626 |
| cg01355753 | 16 | SEPHS2 | 30457524 | rs8046445 | 16 | 30386262 | C | T | -0.752896 | 0.212254 | 0.000389508 | -0.752896 | 0.212254 | 0.000389508 | 1 | 0.0114501 | 0.030549494 |
| cg00152175 | 16 | AMFR | 56459720 | rs7189122 | 16 | 56471410 | C | T | 0.741354 | 0.274419 | 0.006902008 | 0.704754 | 0.197911 | 0.000369568 | 2 | 0.0186543 | 0.029499387 |
| cg08293777 | 16 | RSPRY1 | 57218991 | rs7197204 | 16 | 57221865 | T | G | 0.312798 | 0.0982762 | 0.001458468 | 0.355262 | 0.0918342 | 0.000109541 | 2 | 0.104006 | 0.011204064 |
| cg05481929 | 16 | POLR2C | 57505058 | rs223855 | 16 | 57477934 | C | T | -0.442557 | 0.128391 | 0.000567067 | -0.442557 | 0.128391 | 0.000567067 | 1 | 0.0387776 | 0.040516168 |
| cg09730500 | 16 | GPR56 | 57662690 | rs7196304 | 16 | 57647543 | C | T | 0.624542 | 0.199066 | 0.001704923 | 0.624517 | 0.180849 | 0.000553972 | 2 | 0.0317756 | 0.039808649 |
| cg27404181 | 16 | - | 58270281 | rs6416773 | 16 | 58250459 | C | T | 0.390624 | 0.0854982 | 4.91E-06 | 0.390624 | 0.0854982 | 4.91E-06 | 1 | 0.120879 | 0.000887416 |
| cg00785042 | 16 | NDRG4 | 58538323 | rs12445198 | 16 | 58613808 | T | C | -0.814263 | 0.229449 | 0.000387114 | -0.814263 | 0.229449 | 0.000387114 | 1 | 0.0267784 | 0.030405907 |
| cg20984188 | 16 | B3GNT9 | 67185059 | rs2271294 | 16 | 67902326 | T | A | -1.85462 | 0.383345 | 1.31E-06 | -1.65402 | 0.392229 | 2.48E-05 | 1 | 0.00552338 | 0.003316848 |
| cg09899220 | 16 | ELMO3 | 67232281 | rs7185308 | 16 | 67767060 | G | A | 0.534017 | 0.117622 | 5.63E-06 | 0.534017 | 0.117622 | 5.63E-06 | 1 | 0.0627529 | 0.000982063 |
| cg07545640 | 16 | HSD11B2 | 67464829 | rs8056893 | 16 | 68304392 | C | A | 1.58872 | 0.406884 | 9.44E-05 | 1.58872 | 0.406884 | 9.44E-05 | 1 | 0.0035616 | 0.009933252 |
| cg02851730 | 16 | FAM65A | 67577275 | rs6499145 | 16 | 67929601 | C | T | 1.11747 | 0.218292 | 3.07E-07 | 1.11747 | 0.218292 | 3.07E-07 | 1 | 0.0159315 | 8.23E-05 |
| cg24536529 | 16 | RLTPR | 67683016 | rs4474673 | 16 | 67758778 | T | C | 1.59575 | 0.275382 | 6.87E-09 | 1.59652 | 0.277355 | 8.63E-09 | 1 | 0.0161798 | 3.95E-06 |
| cg05764001 | 16 | RLTPR | 67685403 | rs7193537 | 16 | 67755808 | G | A | -1.31108 | 0.287169 | 4.99E-06 | -1.31108 | 0.287169 | 4.99E-06 | 1 | 0.0103095 | 0.000896311 |
| cg01573194 | 16 | PARD6A | 67695217 | rs7198357 | 16 | 67884619 | T | C | 0.857169 | 0.177155 | 1.31E-06 | 0.857169 | 0.177155 | 1.31E-06 | 1 | 0.0248275 | 0.000293297 |
| cg01287707 | 16 | PARD6A | 67695257 | rs7193537 | 16 | 67755808 | G | A | 0.537241 | 0.117673 | 4.99E-06 | 0.537241 | 0.117673 | 4.99E-06 | 1 | 0.0621848 | 0.000896311 |
| cg16794070 | 16 | PARD6A | 67695265 | rs112192397 | 16 | 67730618 | T | C | 0.755735 | 0.136699 | 3.24E-08 | 0.755735 | 0.136699 | 3.24E-08 | 1 | 0.076979 | 1.19E-05 |
| cg15426734 | 16 | PARD6A | 67695272 | rs9923003 | 16 | 67780121 | A | G | 0.661649 | 0.15012 | 1.05E-05 | 0.661649 | 0.15012 | 1.05E-05 | 1 | 0.0385217 | 0.001603823 |
| cg11698099 | 16 | PARD6A | 67695462 | rs7185308 | 16 | 67767060 | G | A | 0.532482 | 0.117284 | 5.63E-06 | 0.532482 | 0.117284 | 5.63E-06 | 1 | 0.0631383 | 0.000982063 |
| cg26919100 | 16 | PARD6A | 67695516 | rs7198357 | 16 | 67884619 | T | C | 0.540307 | 0.111668 | 1.31E-06 | 0.540307 | 0.111668 | 1.31E-06 | 1 | 0.0626759 | 0.000293297 |
| cg09321029 | 16 | PARD6A | 67695670 | rs7196789 | 16 | 67927124 | T | C | 0.839459 | 0.166505 | 4.62E-07 | 0.839459 | 0.166505 | 4.62E-07 | 1 | 0.0274529 | 0.000118212 |
| cg26335299 | 16 | C16orf86 | 67700143 | rs7185308 | 16 | 67767060 | G | A | -0.591891 | 0.130369 | 5.63E-06 | -0.591891 | 0.130369 | 5.63E-06 | 1 | 0.051071 | 0.000982063 |
| cg04033732 | 16 | - | 67707096 | rs2271294 | 16 | 67902326 | T | A | -0.517413 | 0.106948 | 1.31E-06 | -0.517413 | 0.106948 | 1.31E-06 | 1 | 0.0680867 | 0.00029367 |
| cg00318322 | 16 | GFOD2 | 67708822 | rs7185308 | 16 | 67767060 | G | A | 0.406776 | 0.0895958 | 5.63E-06 | 0.406776 | 0.0895958 | 5.63E-06 | 1 | 0.1083 | 0.000982063 |
| cg03849279 | 16 | GFOD2 | 67751821 | rs7185308 | 16 | 67767060 | G | A | 0.917347 | 0.202053 | 5.63E-06 | 0.917347 | 0.202053 | 5.63E-06 | 1 | 0.021173 | 0.000982063 |
| cg04155026 | 16 | TSNAXIP1 | 67841269 | rs6499143 | 16 | 67874264 | C | T | -0.858546 | 0.179215 | 1.66E-06 | -0.858546 | 0.179215 | 1.66E-06 | 1 | 0.0244171 | 0.000359877 |
| cg00750307 | 16 | NUTF2 | 67882075 | rs58542611 | 16 | 68350219 | T | C | -1.15895 | 0.249539 | 3.42E-06 | -1.15895 | 0.249539 | 3.42E-06 | 1 | 0.0165204 | 0.000652881 |
| cg01669540 | 16 | NUTF2 | 67884473 | rs8060686 | 16 | 67911517 | C | T | -1.2428 | 0.244147 | 3.58E-07 | -1.2428 | 0.244147 | 3.58E-07 | 1 | 0.0126681 | 9.39E-05 |
| cg05986853 | 16 | NRN1L | 67920209 | rs73593810 | 16 | 67866783 | T | C | -1.32584 | 0.231754 | 1.06E-08 | -1.32584 | 0.231754 | 1.06E-08 | 1 | 0.0201314 | 4.60E-06 |
| cg09958192 | 16 | PSKH1 | 67926607 | rs16942887 | 16 | 67928042 | A | G | 1.03436 | 0.167591 | 6.77E-10 | 1.03436 | 0.167591 | 6.77E-10 | 1 | 0.0354734 | 3.84E-07 |
| cg10544611 | 16 | SLC12A4 | 67998164 | rs112434994 | 16 | 67954398 | C | G | -0.254658 | 0.0399276 | 1.80E-10 | -0.252575 | 0.0397182 | 2.04E-10 | 2 | 0.647004 | 1.37E-07 |
| cg06378129 | 16 | SLC12A4 | 67998246 | rs112434994 | 16 | 67954398 | C | G | -0.379342 | 0.0594767 | 1.80E-10 | -0.379342 | 0.0594767 | 1.80E-10 | 1 | 0.289968 | 1.22E-07 |
| cg06803257 | 16 | SLC12A4 | 67999044 | rs8059305 | 16 | 68036666 | C | A | -2.54548 | 0.382047 | 2.70E-11 | -1.73004 | 0.37572 | 4.14E-06 | 1 | 0.00586274 | 0.00077532 |
| cg09086087 | 16 | SLC12A4 | 68000763 | rs111430913 | 16 | 68051225 | T | C | -1.4092 | 0.216339 | 7.36E-11 | -1.4092 | 0.216339 | 7.36E-11 | 1 | 0.0201707 | 5.60E-08 |
| cg26912222 | 16 | SLC12A4 | 68000829 | rs3785100 | 16 | 67997920 | C | T | -0.917376 | 0.144317 | 2.07E-10 | -0.917376 | 0.144317 | 2.07E-10 | 1 | 0.0493442 | 1.39E-07 |
| cg08958168 | 16 | SLC12A4 | 68001415 | rs255056 | 16 | 68016185 | C | G | -0.298216 | 0.04606 | 9.56E-11 | -0.289818 | 0.058673 | 7.84E-07 | 2 | 0.415072 | 0.000187789 |
| cg08571821 | 16 | SLC12A4 | 68003649 | rs2418737 | 16 | 68122726 | C | T | 1.33242 | 0.224888 | 3.14E-09 | 1.33242 | 0.224888 | 3.14E-09 | 1 | 0.0190707 | 1.53E-06 |
| cg10512278 | 16 | DPEP2 | 68027839 | rs12447119 | 16 | 68297928 | A | G | 1.07066 | 0.205935 | 2.01E-07 | 1.07066 | 0.205935 | 2.01E-07 | 1 | 0.0309769 | 5.68E-05 |
| cg02959006 | 16 | DPEP2 | 68033589 | rs55682260 | 16 | 68057880 | A | G | 0.617193 | 0.0945369 | 6.67E-11 | 0.617193 | 0.0945369 | 6.67E-11 | 1 | 0.10492 | 5.13E-08 |
| cg10922280 | 16 | DPEP2 | 68034227 | rs13816 | 16 | 68055495 | C | G | -0.918201 | 0.139372 | 4.48E-11 | -0.918201 | 0.139372 | 4.48E-11 | 1 | 0.0475951 | 3.68E-08 |
| cg06234201 | 16 | - | 68050984 | rs35432211 | 16 | 68095449 | C | T | 1.02613 | 0.159531 | 1.26E-10 | 1.02613 | 0.159531 | 1.26E-10 | 1 | 0.0367541 | 9.04E-08 |
| cg06575692 | 16 | DUS2L | 68112968 | rs7201742 | 16 | 68099821 | G | T | -0.707425 | 0.110677 | 1.65E-10 | -0.707425 | 0.110677 | 1.65E-10 | 1 | 0.0745487 | 1.12E-07 |
| cg08281590 | 16 | - | 68117460 | rs1476306 | 16 | 67973171 | T | C | 1.88884 | 0.353802 | 9.38E-08 | 1.68846 | 0.383496 | 1.07E-05 | 1 | 0.00560814 | 0.001628026 |
| cg04202511 | 16 | NFATC3 | 68117991 | rs2418739 | 16 | 68092850 | C | G | 0.198106 | 0.0376911 | 1.47E-07 | 0.198106 | 0.0376911 | 1.47E-07 | 1 | 0.52385 | 4.30E-05 |
| cg17948846 | 16 | NFATC3 | 68119548 | rs112099181 | 16 | 68154230 | C | T | -0.34071 | 0.0563585 | 1.50E-09 | -0.339531 | 0.0558398 | 1.20E-09 | 2 | 0.339755 | 6.48E-07 |
| cg02570644 | 16 | NFATC3 | 68123248 | rs2418737 | 16 | 68122726 | C | T | -0.640533 | 0.10811 | 3.14E-09 | -0.640533 | 0.10811 | 3.14E-09 | 1 | 0.0830227 | 1.53E-06 |
| cg27607843 | 16 | NFATC3 | 68125182 | rs7201742 | 16 | 68099821 | G | T | -0.413909 | 0.0647561 | 1.65E-10 | -0.413909 | 0.0647561 | 1.65E-10 | 1 | 0.218039 | 1.12E-07 |
| cg16562724 | 16 | ESRP2 | 68270631 | rs9888986 | 16 | 68297228 | A | G | -1.09452 | 0.208065 | 1.44E-07 | -1.09452 | 0.208065 | 1.44E-07 | 1 | 0.0289452 | 4.22E-05 |
| cg00268744 | 16 | PLA2G15 | 68281186 | rs8046975 | 16 | 68061171 | C | T | 1.49651 | 0.279232 | 8.37E-08 | 1.49651 | 0.279232 | 8.37E-08 | 1 | 0.0095586 | 2.66E-05 |
| cg04023204 | 16 | PLA2G15 | 68281979 | rs8058690 | 16 | 68136622 | G | T | 0.888891 | 0.149708 | 2.90E-09 | 0.888891 | 0.149708 | 2.90E-09 | 1 | 0.0444704 | 1.44E-06 |
| cg09835421 | 16 | PRMT7 | 68378352 | rs61593058 | 16 | 68384496 | C | T | -0.266925 | 0.0689776 | 0.000108994 | -0.238985 | 0.0690412 | 0.000537285 | 2 | 0.201848 | 0.03889823 |
| cg05110241 | 16 | PRMT7 | 68378359 | rs61593058 | 16 | 68384496 | C | T | -0.21805 | 0.0563476 | 0.000108994 | -0.214093 | 0.055881 | 0.000127552 | 2 | 0.261712 | 0.012647268 |
| cg03983715 | 16 | PRMT7 | 68378420 | rs56220628 | 16 | 68384837 | A | G | -0.349321 | 0.0755939 | 3.82E-06 | -0.349321 | 0.0755939 | 3.82E-06 | 1 | 0.182558 | 0.000724811 |
| cg05392527 | 16 | SMPD3 | 68394825 | rs1465470 | 16 | 68397909 | A | G | 0.285629 | 0.0823733 | 0.000525418 | 0.285629 | 0.0823733 | 0.000525418 | 1 | 0.0848496 | 0.038351744 |
| cg02226672 | 16 | SMPD3 | 68398533 | rs1465468 | 16 | 68398290 | A | G | 0.116139 | 0.0329089 | 0.000417075 | 0.121551 | 0.0328268 | 0.000213295 | 2 | 0.558279 | 0.019009765 |
| cg16658734 | 16 | SMPD3 | 68401882 | rs2307022 | 16 | 68381978 | A | G | -0.656062 | 0.187311 | 0.000460948 | -0.656062 | 0.187311 | 0.000460948 | 1 | 0.01524 | 0.034692428 |
| cg01372811 | 16 | - | 85970529 | rs11117420 | 16 | 85971922 | C | G | -0.88687 | 0.221098 | 6.04E-05 | -0.88687 | 0.221098 | 6.04E-05 | 1 | 0.0141935 | 0.006836126 |
| cg05622569 | 16 | - | 86006196 | rs2049083 | 16 | 86007706 | A | G | 0.636592 | 0.144235 | 1.02E-05 | 0.636592 | 0.144235 | 1.02E-05 | 1 | 0.0239089 | 0.001568471 |
| cg06321213 | 16 | - | 86009621 | rs72807046 | 16 | 86001621 | T | C | -0.344469 | 0.0943141 | 0.000259904 | -0.370115 | 0.0912125 | 4.96E-05 | 2 | 0.392534 | 0.005817008 |
| cg05829375 | 16 | - | 86012085 | rs4843880 | 16 | 86008641 | C | T | 0.995416 | 0.210111 | 2.17E-06 | 0.995416 | 0.210111 | 2.17E-06 | 1 | 0.0102505 | 0.000453573 |
| cg10520672 | 16 | - | 86018680 | rs12445476 | 16 | 85991269 | G | T | -1.71411 | 0.222327 | 1.27E-14 | -0.808477 | 0.209806 | 0.000116508 | 1 | 0.021074 | 0.011812368 |
| cg12046723 | 16 | MTHFSD | 86589512 | rs79171950 | 16 | 86574435 | G | C | 0.411095 | 0.164949 | 0.0126934 | 0.399649 | 0.115998 | 0.000570517 | 2 | 0.447919 | 0.040601409 |
| cg07529955 | 17 | - | 2663165 | rs1124040 | 17 | 2692321 | A | G | -0.401126 | 0.189057 | 0.03386096 | -0.506662 | 0.144265 | 0.000444809 | 2 | 0.0250871 | 0.033681067 |
| cg07307484 | 17 | MINK1 | 4743324 | rs238242 | 17 | 4849774 | G | A | -0.451053 | 0.128984 | 0.000470639 | -0.451053 | 0.128984 | 0.000470639 | 1 | 0.0294913 | 0.035193073 |
| cg17901582 | 17 | MINK1 | 4751426 | rs238242 | 17 | 4849774 | G | A | -0.908461 | 0.259784 | 0.000470639 | -0.908461 | 0.259784 | 0.000470639 | 1 | 0.00720941 | 0.035193073 |
| cg06444025 | 17 | CHRNE | 4804104 | rs9893197 | 17 | 4757598 | C | T | 0.252372 | 0.0716647 | 0.000429092 | 0.279323 | 0.0668997 | 2.98E-05 | 2 | 0.142734 | 0.003859775 |
| cg09770475 | 17 | - | 4812443 | rs238242 | 17 | 4849774 | G | A | -0.306979 | 0.0877839 | 0.000470639 | -0.306979 | 0.0877839 | 0.000470639 | 1 | 0.0637628 | 0.035193073 |
| cg11340260 | 17 | GP1BA | 4835476 | rs238242 | 17 | 4849774 | G | A | -0.271275 | 0.0775741 | 0.000470639 | -0.271275 | 0.0775741 | 0.000470639 | 1 | 0.0816734 | 0.035193073 |
| cg07892449 | 17 | GP1BA | 4835627 | rs238242 | 17 | 4849774 | G | A | -0.325031 | 0.0929461 | 0.000470639 | -0.325031 | 0.0929461 | 0.000470639 | 1 | 0.0568656 | 0.035193073 |
| cg12810701 | 17 | GPR172B | 4939040 | rs238238 | 17 | 4856376 | A | G | 0.469423 | 0.162052 | 0.003770619 | 0.538011 | 0.146828 | 0.000248141 | 2 | 0.0422312 | 0.021336935 |
| cg07925670 | 17 | ACAP1 | 7253489 | rs35871815 | 17 | 7208373 | C | A | -0.158202 | 0.083446 | 0.0579783 | -0.286516 | 0.0848587 | 0.000734532 | 7 | 1.12105 | 0.049616718 |
| cg02676175 | 17 | KCTD11 | 7253720 | rs35871815 | 17 | 7208373 | C | A | -0.152623 | 0.0805034 | 0.0579783 | -0.279268 | 0.0797728 | 0.000463963 | 7 | 1.21529 | 0.034870795 |
| cg12045829 | 17 | TNFSF12 | 7452926 | rs12941509 | 17 | 7448288 | G | C | -0.281816 | 0.0911873 | 0.001998174 | -0.338223 | 0.0877251 | 0.000115539 | 2 | 0.147918 | 0.011728764 |
| cg10693616 | 17 | ALOX12B | 7982670 | rs2072685 | 17 | 7949434 | A | G | 0.817098 | 0.216878 | 0.000164912 | 0.817098 | 0.216878 | 0.000164912 | 1 | 0.0342638 | 0.015462671 |
| cg24480120 | 17 | ALOX12B | 7982693 | rs2072685 | 17 | 7949434 | A | G | 0.709745 | 0.188384 | 0.000164912 | 0.709745 | 0.188384 | 0.000164912 | 1 | 0.0455457 | 0.015462671 |
| cg18584905 | 17 | SLC6A4 | 28563300 | rs7214014 | 17 | 28611394 | A | G | -1.35794 | 0.350823 | 0.000108559 | -1.35794 | 0.350823 | 0.000108559 | 1 | 0.00395999 | 0.011164918 |
| cg06841846 | 17 | SLC6A4 | 28564094 | rs8073378 | 17 | 28629763 | A | G | -0.676202 | 0.178849 | 0.000156341 | -0.676202 | 0.178849 | 0.000156341 | 1 | 0.0154341 | 0.014882883 |
| cg22113926 | 17 | - | 28566331 | rs7214014 | 17 | 28611394 | A | G | -0.436477 | 0.112764 | 0.000108559 | -0.436477 | 0.112764 | 0.000108559 | 1 | 0.0390213 | 0.011164918 |
| cg10781870 | 17 | TMIGD1 | 28648320 | rs76947460 | 17 | 28652947 | G | A | -0.881595 | 0.254693 | 0.000537464 | -0.881595 | 0.254693 | 0.000537464 | 1 | 0.0077288 | 0.03889823 |
| cg07437263 | 17 | CDK5R1 | 30817129 | rs11656631 | 17 | 30841962 | T | C | 0.0895647 | 0.0280447 | 0.001405019 | 0.103033 | 0.0277047 | 0.00020008 | 3 | 0.679409 | 0.018090584 |
| cg21855910 | 17 | CDK5R1 | 30817397 | rs11656631 | 17 | 30841962 | T | C | 0.14235 | 0.0445729 | 0.001405019 | 0.142103 | 0.0420285 | 0.000722044 | 2 | 0.249383 | 0.04893627 |
| cg21839984 | 17 | MYO1D | 30846986 | rs11656631 | 17 | 30841962 | T | C | -0.124159 | 0.038877 | 0.001405019 | -0.136435 | 0.0380042 | 0.000330757 | 2 | 0.409601 | 0.026891373 |
| cg03218931 | 17 | - | 34835076 | rs11657469 | 17 | 34876195 | T | A | -0.654367 | 0.143634 | 5.22E-06 | -0.654367 | 0.143634 | 5.22E-06 | 1 | 0.0224853 | 0.000930701 |
| cg20934520 | 17 | - | 34838488 | rs12941866 | 17 | 34900120 | G | A | -0.111438 | 0.0243551 | 4.75E-06 | -0.11148 | 0.0243003 | 4.49E-06 | 2 | 0.779105 | 0.000827109 |
| cg05553348 | 17 | - | 34838590 | rs12941866 | 17 | 34900120 | G | A | -0.12259 | 0.0267925 | 4.75E-06 | -0.12259 | 0.0267925 | 4.75E-06 | 1 | 0.63936 | 0.000861294 |
| cg25975805 | 17 | - | 34838641 | rs12941866 | 17 | 34900120 | G | A | -0.190179 | 0.0415644 | 4.75E-06 | -0.190179 | 0.0415644 | 4.75E-06 | 1 | 0.265618 | 0.000861294 |
| cg22460710 | 17 | - | 34838831 | rs12941866 | 17 | 34900120 | G | A | -0.682691 | 0.149205 | 4.75E-06 | -0.682691 | 0.149205 | 4.75E-06 | 1 | 0.0205451 | 0.000861294 |
| cg06162375 | 17 | - | 34839162 | rs11657469 | 17 | 34876195 | T | A | -0.887327 | 0.194769 | 5.22E-06 | -0.887327 | 0.194769 | 5.22E-06 | 1 | 0.0121869 | 0.000930701 |
| cg01764713 | 17 | - | 34839287 | rs7222903 | 17 | 34850623 | T | G | -0.396342 | 0.0942322 | 2.60E-05 | -0.396342 | 0.0942322 | 2.60E-05 | 1 | 0.0502808 | 0.003444643 |
| cg04635138 | 17 | ZNHIT3 | 34841950 | rs1005552 | 17 | 34949598 | C | T | 1.24233 | 0.27398 | 5.78E-06 | 1.24233 | 0.27398 | 5.78E-06 | 1 | 0.00607047 | 0.001001529 |
| cg15670620 | 17 | ZNHIT3 | 34843101 | rs1109442 | 17 | 34862220 | C | T | 0.91916 | 0.215108 | 1.93E-05 | 0.91916 | 0.215108 | 1.93E-05 | 1 | 0.00981924 | 0.002680757 |
| cg11010140 | 17 | GGNBP2 | 34900632 | rs28573110 | 17 | 34914365 | G | A | -0.243356 | 0.0539947 | 6.58E-06 | -0.243356 | 0.0539947 | 6.58E-06 | 1 | 0.159503 | 0.001120522 |
| cg06726747 | 17 | GGNBP2 | 34900645 | rs12941866 | 17 | 34900120 | G | A | 0.254915 | 0.0557127 | 4.75E-06 | 0.254915 | 0.0557127 | 4.75E-06 | 1 | 0.147809 | 0.000861294 |
| cg23086243 | 17 | DHRS11 | 34954931 | rs12949068 | 17 | 34938437 | A | G | 0.803503 | 0.174597 | 4.19E-06 | 0.803503 | 0.174597 | 4.19E-06 | 1 | 0.0151608 | 0.000783979 |
| cg00964751 | 17 | C17orf96 | 36828900 | rs71384258 | 17 | 36838024 | G | A | -0.258913 | 0.0736378 | 0.000438126 | -0.258913 | 0.0736378 | 0.000438126 | 1 | 0.155723 | 0.033323134 |
| cg26027170 | 17 | - | 37394705 | rs8067511 | 17 | 37611352 | C | T | -1.63514 | 0.281238 | 6.12E-09 | -1.56351 | 0.274999 | 1.31E-08 | 1 | 0.0120858 | 5.43E-06 |
| cg00747351 | 17 | - | 37401057 | rs4795367 | 17 | 37608843 | G | C | -0.874009 | 0.157125 | 2.67E-08 | -0.874009 | 0.157125 | 2.67E-08 | 1 | 0.0375449 | 9.98E-06 |
| cg11632150 | 17 | - | 37611403 | rs28799952 | 17 | 37533056 | T | C | -0.916945 | 0.157821 | 6.27E-09 | -0.916945 | 0.157821 | 6.27E-09 | 1 | 0.0375698 | 2.93E-06 |
| ch.17.1009718F | 17 | CDK12 | 37656220 | rs11651089 | 17 | 37589061 | T | G | -1.51955 | 0.262117 | 6.76E-09 | -1.51955 | 0.262117 | 6.76E-09 | 1 | 0.00942997 | 3.15E-06 |
| cg19439043 | 17 | - | 37719913 | rs7218074 | 17 | 37542342 | C | A | 0.491716 | 0.0809964 | 1.28E-09 | 0.445776 | 0.0718969 | 5.66E-10 | 2 | 0.324248 | 3.33E-07 |
| cg17288560 | 17 | - | 37720009 | rs7218074 | 17 | 37542342 | C | A | 0.504902 | 0.0831685 | 1.28E-09 | 0.477838 | 0.0747399 | 1.63E-10 | 2 | 0.282965 | 1.12E-07 |
| cg03321784 | 17 | - | 37729644 | rs7208487 | 17 | 37543449 | G | T | 0.263294 | 0.0463313 | 1.33E-08 | 0.263294 | 0.0463313 | 1.33E-08 | 1 | 0.431411 | 5.48E-06 |
| cg03709307 | 17 | NEUROD2 | 37760652 | rs7208487 | 17 | 37543449 | G | T | 0.960454 | 0.169009 | 1.33E-08 | 0.960454 | 0.169009 | 1.33E-08 | 1 | 0.0322858 | 5.48E-06 |
| cg06081306 | 17 | NEUROD2 | 37760830 | rs12938099 | 17 | 37612910 | T | G | 0.817694 | 0.139302 | 4.37E-09 | 0.728579 | 0.123939 | 4.15E-09 | 2 | 0.172608 | 1.99E-06 |
| cg15070513 | 17 | PPP1R1B | 37782685 | rs9972882 | 17 | 37807698 | A | C | 0.568752 | 0.0769303 | 1.45E-13 | 0.519575 | 0.0716818 | 4.25E-13 | 2 | 0.269876 | 4.44E-10 |
| cg11164145 | 17 | PPP1R1B | 37783689 | rs9972882 | 17 | 37807698 | A | C | -0.596881 | 0.080735 | 1.45E-13 | -0.533611 | 0.0747324 | 9.38E-13 | 2 | 0.260559 | 9.05E-10 |
| cg09762778 | 17 | PPP1R1B | 37783879 | rs9972882 | 17 | 37807698 | A | C | -0.654641 | 0.0885477 | 1.45E-13 | -0.654641 | 0.0885477 | 1.45E-13 | 1 | 0.0824388 | 1.65E-10 |
| cg01799856 | 17 | STARD3 | 37794335 | rs9972882 | 17 | 37807698 | A | C | 0.247043 | 0.0334154 | 1.45E-13 | 0.159089 | 0.0464352 | 0.000612539 | 6 | 3.86489 | 0.042988291 |
| cg03572260 | 17 | STARD3 | 37808339 | rs2271308 | 17 | 37817482 | T | C | 1.32976 | 0.1691 | 3.76E-15 | 1.32976 | 0.1691 | 3.76E-15 | 1 | 0.0214785 | 5.87E-12 |
| cg04429812 | 17 | STARD3 | 37814043 | rs3764351 | 17 | 37824339 | G | A | 0.676653 | 0.0942738 | 7.15E-13 | 0.676653 | 0.0942738 | 7.15E-13 | 1 | 0.0626301 | 7.02E-10 |
| cg19586165 | 17 | STARD3 | 37814072 | rs3764351 | 17 | 37824339 | G | A | -0.666393 | 0.0928444 | 7.15E-13 | -0.666393 | 0.0928444 | 7.15E-13 | 1 | 0.0645844 | 7.02E-10 |
| cg23550016 | 17 | TCAP | 37821447 | rs1053651 | 17 | 37822311 | A | C | 1.17259 | 0.146355 | 1.14E-15 | 1.17259 | 0.146355 | 1.14E-15 | 1 | 0.0289218 | 2.13E-12 |
| cg04895975 | 17 | TCAP | 37821478 | rs2271308 | 17 | 37817482 | T | C | 0.529714 | 0.0673616 | 3.76E-15 | 0.529714 | 0.0673616 | 3.76E-15 | 1 | 0.135931 | 5.87E-12 |
| cg11896923 | 17 | PNMT | 37825027 | rs2313171 | 17 | 37833842 | T | C | 1.25125 | 0.171546 | 3.03E-13 | 1.25125 | 0.171546 | 3.03E-13 | 1 | 0.0186901 | 3.27E-10 |
| cg02944084 | 17 | - | 37827057 | rs2941506 | 17 | 37833035 | A | G | -0.547258 | 0.0679572 | 8.16E-16 | -0.547258 | 0.0679572 | 8.16E-16 | 1 | 0.12327 | 1.59E-12 |
| cg15227682 | 17 | ERBB2 | 37843264 | rs9675194 | 17 | 37833805 | T | C | 1.19743 | 0.165458 | 4.62E-13 | 1.19743 | 0.165458 | 4.62E-13 | 1 | 0.0199996 | 4.80E-10 |
| cg03386751 | 17 | ERBB2 | 37843793 | rs1476278 | 17 | 37836243 | C | T | 0.754635 | 0.102463 | 1.79E-13 | 0.585718 | 0.12856 | 5.22E-06 | 2 | 0.160984 | 0.000930701 |
| cg05512684 | 17 | ERBB2 | 37879858 | rs2517959 | 17 | 37846512 | A | T | -1.03025 | 0.139898 | 1.79E-13 | -1.03025 | 0.139898 | 1.79E-13 | 1 | 0.0285868 | 2.01E-10 |
| cg07967228 | 17 | GRB7 | 37893638 | rs2934953 | 17 | 37832315 | T | A | -1.06234 | 0.138621 | 1.82E-14 | -1.06234 | 0.138621 | 1.82E-14 | 1 | 0.0307456 | 2.42E-11 |
| cg00697095 | 17 | GRB7 | 37897076 | rs1476278 | 17 | 37836243 | C | T | -0.969668 | 0.13166 | 1.79E-13 | -0.969668 | 0.13166 | 1.79E-13 | 1 | 0.0313239 | 2.01E-10 |
| cg19468946 | 17 | IKZF3 | 37922297 | rs12946510 | 17 | 37912377 | T | C | -0.372949 | 0.0373212 | 1.67E-23 | -0.435007 | 0.119408 | 0.00026952 | 3 | 0.428341 | 0.022888313 |
| cg05330360 | 17 | ZPBP2 | 38023993 | rs12949100 | 17 | 38057189 | A | G | -1.50588 | 0.137398 | 6.10E-28 | -1.38773 | 0.193138 | 6.76E-13 | 1 | 0.0126983 | 6.77E-10 |
| cg16810031 | 17 | ZPBP2 | 38024146 | rs12949100 | 17 | 38057189 | A | G | -0.883793 | 0.0806381 | 6.10E-28 | -0.883793 | 0.0806381 | 6.10E-28 | 1 | 0.0711692 | 4.29E-24 |
| cg09639931 | 17 | ZPBP2 | 38024394 | rs12949100 | 17 | 38057189 | A | G | -0.643026 | 0.0586703 | 6.10E-28 | -0.643026 | 0.0586703 | 6.10E-28 | 1 | 0.134524 | 4.29E-24 |
| cg26612727 | 17 | ZPBP2 | 38024636 | rs12936231 | 17 | 38029120 | C | G | -1.1209 | 0.0934247 | 3.76E-33 | -1.1209 | 0.0934247 | 3.76E-33 | 1 | 0.0531338 | 4.06E-29 |
| cg11212589 | 17 | ZPBP2 | 38028394 | rs12936231 | 17 | 38029120 | C | G | 1.1466 | 0.0955664 | 3.76E-33 | 1.1466 | 0.0955664 | 3.76E-33 | 1 | 0.0507736 | 4.06E-29 |
| cg27435903 | 17 | GSDMB | 38065264 | rs62067034 | 17 | 38063738 | C | T | -0.623232 | 0.0532543 | 1.27E-31 | -0.623232 | 0.0532543 | 1.27E-31 | 1 | 0.162382 | 1.28E-27 |
| cg12655416 | 17 | ORMDL3 | 38077870 | rs2305480 | 17 | 38062196 | A | G | 0.407528 | 0.0375831 | 2.20E-27 | 0.37439 | 0.0781987 | 1.69E-06 | 3 | 0.35482 | 0.000364687 |
| cg22144450 | 17 | ORMDL3 | 38080378 | rs8069176 | 17 | 38057197 | A | G | 0.510701 | 0.0465273 | 5.09E-28 | 0.440647 | 0.0930472 | 2.19E-06 | 3 | 0.276387 | 0.000457113 |
| cg18711369 | 17 | ORMDL3 | 38081186 | rs12603332 | 17 | 38082807 | C | T | 0.363095 | 0.0326378 | 9.73E-29 | 0.343895 | 0.0569877 | 1.60E-09 | 3 | 0.477209 | 8.39E-07 |
| cg26971420 | 17 | ORMDL3 | 38085230 | rs7224908 | 17 | 38086854 | A | G | 1.29569 | 0.298627 | 1.43E-05 | 1.29569 | 0.298627 | 1.43E-05 | 1 | 0.00710959 | 0.002062777 |
| cg22833065 | 17 | - | 38095691 | rs11655198 | 17 | 38026169 | C | T | 1.99223 | 0.167827 | 1.73E-32 | 0.965708 | 0.212021 | 5.25E-06 | 2 | 0.0186385 | 0.000934157 |
| cg02965290 | 17 | - | 38108850 | rs9895948 | 17 | 38108363 | T | C | -0.73551 | 0.100015 | 1.94E-13 | -0.73551 | 0.100015 | 1.94E-13 | 1 | 0.0475713 | 2.15E-10 |
| cg08995595 | 17 | GSDMA | 38119330 | rs35123741 | 17 | 38092930 | G | A | 1.29435 | 0.151252 | 1.17E-17 | 1.29435 | 0.151252 | 1.17E-17 | 1 | 0.020457 | 3.15E-14 |
| cg10794714 | 17 | GSDMA | 38133172 | rs60137005 | 17 | 38129996 | T | A | 0.931987 | 0.158135 | 3.79E-09 | 0.931987 | 0.158135 | 3.79E-09 | 1 | 0.0183747 | 1.83E-06 |
| cg21790570 | 17 | GSDMA | 38133323 | rs3859191 | 17 | 38128714 | A | G | 0.420991 | 0.0707534 | 2.69E-09 | 0.420991 | 0.0707534 | 2.69E-09 | 1 | 0.0917423 | 1.34E-06 |
| cg27119415 | 17 | PSMD3 | 38137936 | rs12941811 | 17 | 38159335 | T | C | 1.69792 | 0.365894 | 3.48E-06 | 1.69792 | 0.365894 | 3.48E-06 | 1 | 0.00373804 | 0.000664519 |
| cg04193923 | 17 | CSF3 | 38170900 | rs55736351 | 17 | 38165297 | A | C | 0.706852 | 0.146069 | 1.31E-06 | 0.706852 | 0.146069 | 1.31E-06 | 1 | 0.0229755 | 0.000293184 |
| cg23207054 | 17 | CSF3 | 38171530 | rs12453334 | 17 | 38153473 | T | C | 0.514804 | 0.106744 | 1.42E-06 | 0.514804 | 0.106744 | 1.42E-06 | 1 | 0.0452237 | 0.000313929 |
| cg09161579 | 17 | CSF3 | 38173542 | rs8067817 | 17 | 38163936 | C | T | 0.682761 | 0.127694 | 8.97E-08 | 0.682761 | 0.127694 | 8.97E-08 | 1 | 0.0287159 | 2.83E-05 |
| cg24704510 | 17 | MED24 | 38182512 | rs2227319 | 17 | 38170845 | A | G | 0.821905 | 0.183719 | 7.69E-06 | 0.821905 | 0.183719 | 7.69E-06 | 1 | 0.0151589 | 0.00126764 |
| cg20935841 | 17 | MED24 | 38183170 | rs35272691 | 17 | 38157841 | C | T | -1.01971 | 0.214306 | 1.96E-06 | -1.01971 | 0.214306 | 1.96E-06 | 1 | 0.0109878 | 0.000413881 |
| cg03671276 | 17 | MED24 | 38183370 | rs12453334 | 17 | 38153473 | T | C | 1.62422 | 0.33678 | 1.42E-06 | 1.62422 | 0.33678 | 1.42E-06 | 1 | 0.00447142 | 0.000313929 |
| cg10374813 | 17 | MED24 | 38183790 | rs2270401 | 17 | 38176256 | T | A | -0.279935 | 0.0622586 | 6.92E-06 | -0.279935 | 0.0622586 | 6.92E-06 | 1 | 0.133849 | 0.001167965 |
| cg26628907 | 17 | MED24 | 38195238 | rs11078931 | 17 | 38147294 | T | C | 1.21158 | 0.236882 | 3.15E-07 | 1.21158 | 0.236882 | 3.15E-07 | 1 | 0.00887632 | 8.38E-05 |
| cg16632636 | 17 | - | 38213364 | rs12950335 | 17 | 38215314 | A | G | 0.720355 | 0.146419 | 8.68E-07 | 0.720355 | 0.146419 | 8.68E-07 | 1 | 0.0222674 | 0.00020592 |
| cg07313155 | 17 | THRA | 38218601 | rs2270401 | 17 | 38176256 | T | A | -0.25413 | 0.0565193 | 6.92E-06 | -0.25413 | 0.0565193 | 6.92E-06 | 1 | 0.16243 | 0.001167965 |
| cg08324801 | 17 | - | 38263416 | rs77444159 | 17 | 38333134 | A | G | -0.23226 | 0.285911 | 0.416591 | -0.3567 | 0.104078 | 0.00060986 | 5 | 0.867491 | 0.042855942 |
| cg05729588 | 17 | DCAKD | 43101525 | rs55933307 | 17 | 43103905 | G | A | -0.222338 | 0.0715807 | 0.001895787 | -0.238693 | 0.068705 | 0.000512524 | 2 | 0.165494 | 0.037688901 |
| cg11028313 | 17 | PLCD3 | 43209292 | rs916661 | 17 | 43158902 | A | G | 0.319745 | 0.103399 | 0.001985902 | 0.287382 | 0.0814726 | 0.000419836 | 2 | 0.0962101 | 0.032272444 |
| cg23659289 | 17 | ARHGAP27 | 43472725 | rs1560310 | 17 | 43978534 | A | G | -0.265813 | 0.0421238 | 2.80E-10 | -0.266277 | 0.0412783 | 1.12E-10 | 2 | 0.396589 | 8.16E-08 |
| cg00715050 | 17 | ARHGAP27 | 43472920 | rs113161176 | 17 | 43974354 | A | G | -0.961722 | 0.152739 | 3.06E-10 | -0.961722 | 0.152739 | 3.06E-10 | 1 | 0.0290375 | 1.96E-07 |
| cg24349819 | 17 | ARHGAP27 | 43476547 | rs1230098 | 17 | 43478193 | A | C | -0.365944 | 0.0990196 | 0.000219368 | -0.365944 | 0.0990196 | 0.000219368 | 1 | 0.0567888 | 0.019465389 |
| cg19943578 | 17 | ARHGAP27 | 43483527 | rs62065385 | 17 | 43534694 | T | C | 0.474971 | 0.0826496 | 9.12E-09 | 0.474971 | 0.0826496 | 9.12E-09 | 1 | 0.116985 | 4.12E-06 |
| cg24477401 | 17 | ARHGAP27 | 43484506 | rs34286926 | 17 | 43495852 | G | A | 0.169532 | 0.0302917 | 2.19E-08 | 0.177416 | 0.029284 | 1.38E-09 | 4 | 0.970073 | 7.38E-07 |
| cg16734549 | 17 | ARHGAP27 | 43488551 | rs34063617 | 17 | 43491003 | A | G | -0.999419 | 0.180684 | 3.19E-08 | -0.999419 | 0.180684 | 3.19E-08 | 1 | 0.024352 | 1.17E-05 |
| cg07067577 | 17 | SH3D20 | 43506829 | rs2077606 | 17 | 43529293 | A | G | 0.375152 | 0.0649026 | 7.48E-09 | 0.375152 | 0.0649026 | 7.48E-09 | 1 | 0.189286 | 3.47E-06 |
| cg08333931 | 17 | SH3D20 | 43507875 | rs12947718 | 17 | 43493101 | A | G | -1.21157 | 0.21869 | 3.03E-08 | -1.21157 | 0.21869 | 3.03E-08 | 1 | 0.0165743 | 1.13E-05 |
| cg08113562 | 17 | SH3D20 | 43508428 | rs34465449 | 17 | 43511435 | A | C | -0.140125 | 0.0244755 | 1.04E-08 | -0.147159 | 0.0235006 | 3.82E-10 | 5 | 1.43358 | 2.37E-07 |
| cg12297030 | 17 | - | 43662878 | rs371996525 | 17 | 44183317 | A | C | -1.20985 | 0.198189 | 1.04E-09 | -1.20985 | 0.198189 | 1.04E-09 | 1 | 0.0190827 | 5.71E-07 |
| cg03954353 | 17 | C17orf69 | 43715162 | rs62055491 | 17 | 43951120 | C | T | -0.28479 | 0.0454342 | 3.67E-10 | -0.288 | 0.0446765 | 1.15E-10 | 2 | 0.339781 | 8.34E-08 |
| cg10159607 | 17 | C17orf69 | 43716515 | rs62056839 | 17 | 43989221 | C | T | 1.54747 | 0.244972 | 2.68E-10 | 1.49416 | 0.239629 | 4.53E-10 | 1 | 0.0117761 | 2.73E-07 |
| cg01882395 | 17 | C17orf69 | 43717810 | rs56280222 | 17 | 43803788 | C | T | -0.280403 | 0.044719 | 3.62E-10 | -0.282115 | 0.0438612 | 1.27E-10 | 2 | 0.353136 | 9.04E-08 |
| cg16228356 | 17 | - | 43848958 | rs169201 | 17 | 44790203 | G | A | 0.173853 | 0.0303981 | 1.07E-08 | 0.146183 | 0.0369879 | 7.75E-05 | 7 | 1.15041 | 0.008401343 |
| cg08929103 | 17 | CRHR1 | 43860355 | rs199528 | 17 | 44843136 | T | C | 1.20913 | 0.215415 | 1.99E-08 | 1.20913 | 0.215415 | 1.99E-08 | 1 | 0.015548 | 7.69E-06 |
| cg12577105 | 17 | CRHR1 | 43860685 | rs199445 | 17 | 44817408 | T | C | -1.63769 | 0.290811 | 1.79E-08 | -1.62985 | 0.303087 | 7.57E-08 | 1 | 0.00765496 | 2.46E-05 |
| cg08473090 | 17 | CRHR1 | 43861104 | rs199533 | 17 | 44828931 | A | G | -0.903347 | 0.159353 | 1.44E-08 | -0.903347 | 0.159353 | 1.44E-08 | 1 | 0.0278712 | 5.87E-06 |
| cg27551605 | 17 | CRHR1 | 43862910 | rs199451 | 17 | 44801784 | A | G | 0.816736 | 0.145318 | 1.91E-08 | 0.816736 | 0.145318 | 1.91E-08 | 1 | 0.033855 | 7.39E-06 |
| cg07778819 | 17 | CRHR1 | 43862927 | rs169201 | 17 | 44790203 | G | A | 0.975304 | 0.170531 | 1.07E-08 | 0.975304 | 0.170531 | 1.07E-08 | 1 | 0.0242044 | 4.60E-06 |
| cg24063856 | 17 | CRHR1 | 43863303 | rs62054384 | 17 | 43804306 | C | T | 0.434119 | 0.0694404 | 4.08E-10 | 0.440607 | 0.0682787 | 1.10E-10 | 2 | 0.145454 | 8.11E-08 |
| cg13947929 | 17 | CRHR1 | 43863356 | rs12944712 | 17 | 43871147 | A | G | 0.415214 | 0.0952238 | 1.30E-05 | 0.421836 | 0.0886185 | 1.94E-06 | 2 | 0.0707257 | 0.00041104 |
| cg00022871 | 17 | CRHR1 | 43884358 | rs17690703 | 17 | 43925297 | T | C | 1.07268 | 0.188248 | 1.21E-08 | 1.07268 | 0.188248 | 1.21E-08 | 1 | 0.0185766 | 5.14E-06 |
| cg27503360 | 17 | CRHR1 | 43890749 | rs199451 | 17 | 44801784 | A | G | 0.385986 | 0.0686767 | 1.91E-08 | 0.329536 | 0.0661933 | 6.42E-07 | 3 | 0.229267 | 0.000158211 |
| cg15679139 | 17 | LOC100128977 | 43921485 | rs1358071 | 17 | 43803189 | C | A | 1.65428 | 0.299913 | 3.48E-08 | 1.65428 | 0.299913 | 3.48E-08 | 1 | 0.00664822 | 1.26E-05 |
| cg11434527 | 17 | LOC100128977 | 43921565 | rs62056789 | 17 | 43975415 | C | A | 0.282582 | 0.0448792 | 3.06E-10 | 0.286504 | 0.0445253 | 1.24E-10 | 2 | 0.342281 | 8.96E-08 |
| cg03723148 | 17 | LOC100128977 | 43921863 | rs7207373 | 17 | 43770712 | T | C | 1.18277 | 0.206122 | 9.60E-09 | 1.18277 | 0.206122 | 9.60E-09 | 1 | 0.0147992 | 4.29E-06 |
| cg03882071 | 17 | LOC100128977 | 43922210 | rs12373139 | 17 | 43924130 | A | G | 1.74481 | 0.277724 | 3.35E-10 | 1.36293 | 0.237341 | 9.36E-09 | 1 | 0.0139075 | 4.20E-06 |
| cg15072306 | 17 | LOC100128977 | 43922875 | rs199439 | 17 | 44793503 | G | A | 0.778381 | 0.136624 | 1.22E-08 | 0.778381 | 0.136624 | 1.22E-08 | 1 | 0.0377846 | 5.14E-06 |
| cg27589368 | 17 | LOC100128977 | 43923255 | rs199439 | 17 | 44793503 | G | A | 0.434921 | 0.0763388 | 1.22E-08 | 0.434921 | 0.0763388 | 1.22E-08 | 1 | 0.121275 | 5.14E-06 |
| cg05301556 | 17 | MAPT | 43971177 | rs199447 | 17 | 44812188 | T | C | 0.464228 | 0.0823701 | 1.75E-08 | 0.464228 | 0.0823701 | 1.75E-08 | 1 | 0.105772 | 6.89E-06 |
| cg11117266 | 17 | MAPT | 43971461 | rs62055516 | 17 | 43956390 | C | T | 0.406674 | 0.0651442 | 4.32E-10 | 0.392628 | 0.072896 | 7.22E-08 | 2 | 0.166499 | 2.36E-05 |
| cg16520312 | 17 | MAPT | 43971471 | rs1864325 | 17 | 43977827 | T | C | 0.244179 | 0.0387105 | 2.84E-10 | 0.246375 | 0.0381545 | 1.07E-10 | 2 | 0.465235 | 7.93E-08 |
| cg07163735 | 17 | MAPT | 43971906 | rs62062271 | 17 | 44091988 | C | T | -0.983684 | 0.165314 | 2.68E-09 | -0.983684 | 0.165314 | 2.68E-09 | 1 | 0.0255424 | 1.34E-06 |
| cg23202277 | 17 | MAPT | 43971911 | rs62056779 | 17 | 43971937 | A | C | -0.224885 | 0.0357031 | 3.01E-10 | -0.232412 | 0.0384167 | 1.46E-09 | 3 | 0.551145 | 7.71E-07 |
| cg20099416 | 17 | MAPT | 43971919 | rs74457229 | 17 | 43972581 | T | C | -0.21674 | 0.0344098 | 3.01E-10 | -0.220454 | 0.0339401 | 8.32E-11 | 3 | 0.58604 | 6.22E-08 |
| cg21327887 | 17 | MAPT | 43971928 | rs74457229 | 17 | 43972581 | T | C | -0.18212 | 0.0289136 | 3.01E-10 | -0.180626 | 0.0316997 | 1.22E-08 | 4 | 0.895671 | 5.14E-06 |
| cg00891649 | 17 | MAPT | 43972573 | rs199457 | 17 | 44795469 | T | C | 0.242139 | 0.042258 | 1.01E-08 | 0.219665 | 0.0485158 | 5.97E-06 | 3 | 0.466038 | 0.001029335 |
| cg11489262 | 17 | MAPT | 43973426 | rs76669427 | 17 | 43836051 | A | T | -0.351317 | 0.0558292 | 3.13E-10 | -0.349195 | 0.0552321 | 2.59E-10 | 2 | 0.222093 | 1.70E-07 |
| cg19156875 | 17 | MAPT | 43974446 | rs199533 | 17 | 44828931 | A | G | -1.06999 | 0.18875 | 1.44E-08 | -1.06999 | 0.18875 | 1.44E-08 | 1 | 0.0198333 | 5.87E-06 |
| cg14202850 | 17 | MAPT | 43974869 | rs199439 | 17 | 44793503 | G | A | -0.415075 | 0.0728554 | 1.22E-08 | -0.415075 | 0.0728554 | 1.22E-08 | 1 | 0.133172 | 5.14E-06 |
| cg11909912 | 17 | MAPT | 43974919 | rs75676226 | 17 | 43947171 | A | G | -0.893563 | 0.142164 | 3.28E-10 | -0.893563 | 0.142164 | 3.28E-10 | 1 | 0.0335992 | 2.08E-07 |
| cg04382470 | 17 | MAPT | 43974975 | rs56042957 | 17 | 43992244 | A | G | -0.862858 | 0.13647 | 2.58E-10 | -0.862858 | 0.13647 | 2.58E-10 | 1 | 0.0364189 | 1.70E-07 |
| cg10224600 | 17 | MAPT | 43975063 | rs199448 | 17 | 44809001 | G | A | -0.5396 | 0.0959942 | 1.90E-08 | -0.5396 | 0.0959942 | 1.90E-08 | 1 | 0.0777638 | 7.39E-06 |
| cg10955972 | 17 | MAPT | 43976002 | rs199447 | 17 | 44812188 | T | C | -0.643019 | 0.114094 | 1.75E-08 | -0.643019 | 0.114094 | 1.75E-08 | 1 | 0.0550653 | 6.89E-06 |
| cg19108736 | 17 | MAPT | 43977403 | rs62055515 | 17 | 43956370 | T | G | -1.57848 | 0.252853 | 4.32E-10 | -1.53918 | 0.252932 | 1.17E-09 | 1 | 0.0109995 | 6.30E-07 |
| cg20888521 | 17 | MAPT | 43977917 | rs62055515 | 17 | 43956370 | T | G | -1.25546 | 0.20111 | 4.32E-10 | -1.25546 | 0.20111 | 4.32E-10 | 1 | 0.0167354 | 2.62E-07 |
| cg12633764 | 17 | MAPT | 43978756 | rs62056789 | 17 | 43975415 | C | A | -0.682098 | 0.108329 | 3.06E-10 | -0.682098 | 0.108329 | 3.06E-10 | 1 | 0.0578633 | 1.96E-07 |
| cg26413900 | 17 | MAPT | 43985654 | rs7210728 | 17 | 43968415 | A | G | 0.474898 | 0.0928279 | 3.13E-07 | 0.474898 | 0.0928279 | 3.13E-07 | 1 | 0.0608889 | 8.35E-05 |
| cg16573346 | 17 | MAPT | 44020278 | rs2074404 | 17 | 44865439 | G | T | -1.18928 | 0.265316 | 7.38E-06 | -1.18928 | 0.265316 | 7.38E-06 | 1 | 0.00874052 | 0.001222865 |
| cg00699617 | 17 | MAPT | 44026428 | rs199454 | 17 | 44800110 | G | A | 1.08979 | 0.227995 | 1.76E-06 | 1.08979 | 0.227995 | 1.76E-06 | 1 | 0.0123921 | 0.000376633 |
| cg05772917 | 17 | MAPT | 44027251 | rs199439 | 17 | 44793503 | G | A | -0.417955 | 0.0733609 | 1.22E-08 | -0.417955 | 0.0733609 | 1.22E-08 | 1 | 0.131338 | 5.14E-06 |
| cg03836283 | 17 | MAPT | 44058856 | rs142955985 | 17 | 43933790 | T | G | -1.32119 | 0.214274 | 7.04E-10 | -1.32119 | 0.214274 | 7.04E-10 | 1 | 0.0148746 | 3.97E-07 |
| cg19276540 | 17 | MAPT | 44060353 | rs17564223 | 17 | 43997520 | T | C | -1.76755 | 0.281729 | 3.54E-10 | -1.66337 | 0.311505 | 9.33E-08 | 1 | 0.00609689 | 2.92E-05 |
| cg01934064 | 17 | MAPT | 44064242 | rs169201 | 17 | 44790203 | G | A | -0.280606 | 0.0490639 | 1.07E-08 | -0.280606 | 0.0490639 | 1.07E-08 | 1 | 0.293657 | 4.60E-06 |
| cg16656794 | 17 | MAPT | 44068842 | rs17563986 | 17 | 43991272 | G | A | -1.80273 | 0.285211 | 2.62E-10 | -1.82928 | 0.395607 | 3.77E-06 | 1 | 0.00545093 | 0.000715357 |
| cg00480298 | 17 | MAPT | 44068857 | rs199451 | 17 | 44801784 | A | G | -0.458984 | 0.0816649 | 1.91E-08 | -0.458984 | 0.0816649 | 1.91E-08 | 1 | 0.107442 | 7.39E-06 |
| cg05721485 | 17 | MAPT | 44071124 | rs2019822 | 17 | 43959918 | A | T | -0.406106 | 0.0650403 | 4.29E-10 | -0.406106 | 0.0650403 | 4.29E-10 | 1 | 0.161126 | 2.61E-07 |
| cg12604352 | 17 | MAPT | 44073915 | rs199533 | 17 | 44828931 | A | G | 0.608824 | 0.107398 | 1.44E-08 | 0.608824 | 0.107398 | 1.44E-08 | 1 | 0.0614823 | 5.87E-06 |
| cg24677220 | 17 | MAPT | 44075684 | rs2316772 | 17 | 43946423 | C | A | -1.11994 | 0.17959 | 4.51E-10 | -1.11994 | 0.17959 | 4.51E-10 | 1 | 0.0210492 | 2.73E-07 |
| cg20840174 | 17 | MAPT | 44087784 | rs113796169 | 17 | 44005254 | A | T | 0.688538 | 0.109564 | 3.31E-10 | 0.688538 | 0.109564 | 3.31E-10 | 1 | 0.0566808 | 2.09E-07 |
| cg07368061 | 17 | MAPT | 44090862 | rs199457 | 17 | 44795469 | T | C | 0.178266 | 0.031111 | 1.01E-08 | 0.180287 | 0.0302564 | 2.55E-09 | 3 | 0.789012 | 1.28E-06 |
| cg05533539 | 17 | MAPT | 44104521 | rs169201 | 17 | 44790203 | G | A | 0.273447 | 0.0478122 | 1.07E-08 | 0.275117 | 0.0467101 | 3.88E-09 | 2 | 0.321042 | 1.87E-06 |
| cg09764761 | 17 | MAPT | 44105544 | rs199457 | 17 | 44795469 | T | C | 0.190558 | 0.033256 | 1.01E-08 | 0.191596 | 0.0323546 | 3.20E-09 | 3 | 0.696317 | 1.56E-06 |
| cg08318660 | 17 | KIAA1267 | 44122580 | rs169201 | 17 | 44790203 | G | A | -0.574357 | 0.100426 | 1.07E-08 | -0.574357 | 0.100426 | 1.07E-08 | 1 | 0.0700087 | 4.60E-06 |
| cg22192454 | 17 | KIAA1267 | 44135007 | rs28439143 | 17 | 43987723 | A | G | -0.540277 | 0.0857511 | 2.98E-10 | -0.440589 | 0.124499 | 0.000401876 | 2 | 0.192147 | 0.031382876 |
| cg21214508 | 17 | KIAA1267 | 44248233 | rs169201 | 17 | 44790203 | G | A | 0.415714 | 0.0726874 | 1.07E-08 | 0.333628 | 0.0938451 | 0.000377926 | 3 | 0.197308 | 0.029945379 |
| cg26855231 | 17 | KIAA1267 | 44249543 | rs169201 | 17 | 44790203 | G | A | -0.27504 | 0.0480906 | 1.07E-08 | -0.27504 | 0.0480906 | 1.07E-08 | 1 | 0.305667 | 4.60E-06 |
| cg19832721 | 17 | KIAA1267 | 44249866 | rs199457 | 17 | 44795469 | T | C | -0.130215 | 0.0227251 | 1.01E-08 | -0.126268 | 0.02268 | 2.59E-08 | 4 | 1.46808 | 9.75E-06 |
| cg14334911 | 17 | - | 44271018 | rs1378358 | 17 | 44787312 | T | C | 1.32374 | 0.233545 | 1.45E-08 | 1.32374 | 0.233545 | 1.45E-08 | 1 | 0.0128375 | 5.89E-06 |
| cg09250749 | 17 | - | 44271316 | rs199447 | 17 | 44812188 | T | C | -1.30947 | 0.232345 | 1.75E-08 | -1.30947 | 0.232345 | 1.75E-08 | 1 | 0.013194 | 6.89E-06 |
| cg08862499 | 17 | - | 44271469 | rs169201 | 17 | 44790203 | G | A | 0.686888 | 0.120102 | 1.07E-08 | 0.686888 | 0.120102 | 1.07E-08 | 1 | 0.0489136 | 4.60E-06 |
| cg17554502 | 17 | - | 44271559 | rs199513 | 17 | 44856932 | A | G | -1.33852 | 0.253173 | 1.25E-07 | -1.33852 | 0.253173 | 1.25E-07 | 1 | 0.0110256 | 3.73E-05 |
| cg17911788 | 17 | - | 44343683 | rs199457 | 17 | 44795469 | T | C | 0.14642 | 0.0255532 | 1.01E-08 | 0.128578 | 0.0273515 | 2.59E-06 | 4 | 1.33889 | 0.000530646 |
| cg03575189 | 17 | - | 44344142 | rs538628 | 17 | 44787313 | C | G | 0.589137 | 0.103243 | 1.16E-08 | 0.589137 | 0.103243 | 1.16E-08 | 1 | 0.0662479 | 4.95E-06 |
| cg03216596 | 17 | NSF | 44812378 | rs169201 | 17 | 44790203 | G | A | 2.11226 | 0.369328 | 1.07E-08 | 1.74301 | 0.388849 | 7.38E-06 | 1 | 0.00401734 | 0.001222865 |
| cg09320190 | 17 | WNT3 | 44847220 | rs2074404 | 17 | 44865439 | G | T | -0.891775 | 0.198947 | 7.38E-06 | -0.891775 | 0.198947 | 7.38E-06 | 1 | 0.0156442 | 0.001222865 |
| cg16677019 | 17 | WNT3 | 44847268 | rs2074404 | 17 | 44865439 | G | T | -0.644236 | 0.143723 | 7.38E-06 | -0.644236 | 0.143723 | 7.38E-06 | 1 | 0.0300724 | 0.001222865 |
| cg19711530 | 17 | WNT3 | 44847427 | rs2074404 | 17 | 44865439 | G | T | -0.574171 | 0.128092 | 7.38E-06 | -0.574171 | 0.128092 | 7.38E-06 | 1 | 0.037887 | 0.001222865 |
| cg06491244 | 17 | WNT3 | 44851046 | rs199455 | 17 | 44799216 | C | T | -0.569584 | 0.121951 | 3.01E-06 | -0.569584 | 0.121951 | 3.01E-06 | 1 | 0.0436667 | 0.000588966 |
| cg00140914 | 17 | WNT3 | 44859215 | rs415430 | 17 | 44859144 | C | T | -1.11389 | 0.204554 | 5.18E-08 | -1.11389 | 0.204554 | 5.18E-08 | 1 | 0.016892 | 1.81E-05 |
| cg25342861 | 17 | - | 45177598 | rs9896243 | 17 | 44826056 | G | C | -1.29632 | 0.241064 | 7.57E-08 | -1.29632 | 0.241064 | 7.57E-08 | 1 | 0.0121694 | 2.46E-05 |
| cg19079546 | 17 | C17orf57 | 45401148 | rs7221196 | 17 | 45374994 | G | A | 1.23674 | 0.347577 | 0.000373539 | 1.23674 | 0.347577 | 0.000373539 | 1 | 0.00385582 | 0.029713922 |
| cg07515367 | 17 | C17orf57 | 45401150 | rs7221196 | 17 | 45374994 | G | A | 0.71828 | 0.201868 | 0.000373539 | 0.71828 | 0.201868 | 0.000373539 | 1 | 0.0115827 | 0.029713922 |
| cg07432352 | 17 | C17orf57 | 45403706 | rs7220606 | 17 | 45374795 | A | G | -0.393966 | 0.110535 | 0.00036508 | -0.393966 | 0.110535 | 0.00036508 | 1 | 0.0388791 | 0.029198679 |
| cg01070694 | 17 | KPNB1 | 45727082 | rs148442642 | 17 | 45719755 | T | C | -1.72728 | 0.428565 | 5.57E-05 | -1.72728 | 0.428565 | 5.57E-05 | 1 | 0.0142362 | 0.006405783 |
| cg01626401 | 17 | KPNB1 | 45727086 | rs116980297 | 17 | 45480167 | A | T | -1.19017 | 0.263418 | 6.24E-06 | -1.19017 | 0.263418 | 6.24E-06 | 1 | 0.0293551 | 0.00107331 |
| cg13416381 | 17 | - | 46090231 | rs2256020 | 17 | 46050635 | C | T | 0.0785859 | 0.029113 | 0.006947872 | 0.133375 | 0.0390633 | 0.000639464 | 9 | 2.74597 | 0.044530887 |
| cg19139618 | 17 | SKAP1 | 46504791 | rs8079809 | 17 | 46449402 | G | C | 0.326215 | 0.110521 | 0.00316141 | 0.361708 | 0.100762 | 0.000331094 | 2 | 0.0786845 | 0.026905246 |
| cg14179401 | 17 | - | 46550107 | rs3826397 | 17 | 46509447 | C | T | 0.513608 | 0.125609 | 4.34E-05 | 0.513608 | 0.125609 | 4.34E-05 | 1 | 0.0343814 | 0.005206608 |
| cg04881814 | 17 | CA10 | 50236572 | rs2931364 | 17 | 50255488 | A | G | -0.279469 | 0.067692 | 3.65E-05 | -0.279469 | 0.067692 | 3.65E-05 | 1 | 0.113011 | 0.004562196 |
| cg07398767 | 17 | CA10 | 50237205 | rs2970047 | 17 | 50254327 | A | G | 1.35604 | 0.330437 | 4.07E-05 | 1.35604 | 0.330437 | 4.07E-05 | 1 | 0.00457105 | 0.004990553 |
| cg08605326 | 17 | CA10 | 50237401 | rs2970047 | 17 | 50254327 | A | G | 1.13101 | 0.275602 | 4.07E-05 | 1.13101 | 0.275602 | 4.07E-05 | 1 | 0.00660619 | 0.004990553 |
| cg20552747 | 17 | CA10 | 50237576 | rs1503046 | 17 | 50231739 | A | G | 1.07283 | 0.312725 | 0.000602345 | 1.07283 | 0.312725 | 0.000602345 | 1 | 0.00545219 | 0.042538844 |
| cg14013659 | 17 | RNFT1 | 58038899 | rs1292055 | 17 | 57959068 | G | A | 0.113636 | 0.0319159 | 0.00037024 | 0.113636 | 0.0319159 | 0.00037024 | 1 | 0.474257 | 0.029538483 |
| cg10510337 | 17 | - | 76666264 | rs7211645 | 17 | 76803956 | T | C | -1.4027 | 0.417847 | 0.000788122 | -1.21485 | 0.317053 | 0.000127309 | 2 | 0.0126992 | 0.012630928 |
| cg21255657 | 17 | CANT1 | 77006304 | rs3744173 | 17 | 76994493 | T | G | 0.067931 | 0.0326003 | 0.03718231 | 0.117359 | 0.0303856 | 0.000112348 | 7 | 2.34002 | 0.011455055 |
| cg16779839 | 17 | BAHCC1 | 79374327 | rs11654454 | 17 | 79491186 | C | T | -0.547845 | 0.155224 | 0.000416616 | -0.547845 | 0.155224 | 0.000416616 | 1 | 0.0211857 | 0.032101046 |
| cg06636541 | 17 | BAHCC1 | 79374515 | rs11654454 | 17 | 79491186 | C | T | -0.545931 | 0.154682 | 0.000416616 | -0.545931 | 0.154682 | 0.000416616 | 1 | 0.0213353 | 0.032101046 |
| cg04591732 | 17 | BAHCC1 | 79419108 | rs28365891 | 17 | 79480302 | C | T | -0.735624 | 0.194685 | 0.000157802 | -0.735624 | 0.194685 | 0.000157802 | 1 | 0.0126339 | 0.014889319 |
| cg21373806 | 17 | BAHCC1 | 79419834 | rs11654454 | 17 | 79491186 | C | T | -0.51842 | 0.146887 | 0.000416616 | -0.51842 | 0.146887 | 0.000416616 | 1 | 0.0236703 | 0.032101046 |
| cg18050634 | 17 | BAHCC1 | 79420145 | rs11654454 | 17 | 79491186 | C | T | -0.174173 | 0.0493494 | 0.000416616 | -0.174173 | 0.0493494 | 0.000416616 | 1 | 0.210457 | 0.032101046 |
| cg24550880 | 17 | BAHCC1 | 79420279 | rs11654454 | 17 | 79491186 | C | T | -0.186788 | 0.0529236 | 0.000416616 | -0.178425 | 0.0519887 | 0.000599242 | 2 | 0.190088 | 0.042385405 |
| cg04665204 | 17 | BAHCC1 | 79420424 | rs7342974 | 17 | 79483999 | C | T | -0.627174 | 0.161782 | 0.00010594 | -0.627174 | 0.161782 | 0.00010594 | 1 | 0.0182632 | 0.010953226 |
| cg17102495 | 17 | BAHCC1 | 79421644 | rs7342974 | 17 | 79483999 | C | T | -0.548472 | 0.14148 | 0.00010594 | -0.548472 | 0.14148 | 0.00010594 | 1 | 0.023908 | 0.010953226 |
| cg06663615 | 17 | BAHCC1 | 79423959 | rs11654454 | 17 | 79491186 | C | T | 0.41011 | 0.116199 | 0.000416616 | 0.41011 | 0.116199 | 0.000416616 | 1 | 0.0378628 | 0.032101046 |
| cg22515589 | 17 | BAHCC1 | 79426432 | rs28365891 | 17 | 79480302 | C | T | 0.717198 | 0.189808 | 0.000157802 | 0.717198 | 0.189808 | 0.000157802 | 1 | 0.0132959 | 0.014889319 |
| cg15419378 | 17 | - | 79435967 | rs28365891 | 17 | 79480302 | C | T | 0.512704 | 0.135688 | 0.000157802 | 0.512704 | 0.135688 | 0.000157802 | 1 | 0.0261028 | 0.014889319 |
| cg04847386 | 17 | - | 79445297 | rs11652637 | 17 | 79486992 | G | C | -0.965602 | 0.251155 | 0.000120769 | -0.965602 | 0.251155 | 0.000120769 | 1 | 0.00758445 | 0.01213054 |
| cg16296754 | 17 | - | 79448940 | rs11654454 | 17 | 79491186 | C | T | -0.534669 | 0.151491 | 0.000416616 | -0.534669 | 0.151491 | 0.000416616 | 1 | 0.0222476 | 0.032101046 |
| cg05373251 | 17 | - | 79451985 | rs28365891 | 17 | 79480302 | C | T | -0.504939 | 0.133633 | 0.000157802 | -0.504939 | 0.133633 | 0.000157802 | 1 | 0.0269133 | 0.014889319 |
| cg18048655 | 17 | - | 79453575 | rs11654454 | 17 | 79491186 | C | T | 0.28544 | 0.0808753 | 0.000416616 | 0.28544 | 0.0808753 | 0.000416616 | 1 | 0.0782918 | 0.032101046 |
| cg19478079 | 17 | - | 79453653 | rs7342974 | 17 | 79483999 | C | T | -0.452401 | 0.116699 | 0.00010594 | -0.452401 | 0.116699 | 0.00010594 | 1 | 0.0351824 | 0.010953226 |
| cg04778793 | 17 | - | 79454924 | rs28365891 | 17 | 79480302 | C | T | 0.257387 | 0.068118 | 0.000157802 | 0.257387 | 0.068118 | 0.000157802 | 1 | 0.103842 | 0.014889319 |
| cg10247585 | 17 | - | 79455356 | rs28365891 | 17 | 79480302 | C | T | 0.573998 | 0.15191 | 0.000157802 | 0.573998 | 0.15191 | 0.000157802 | 1 | 0.0208076 | 0.014889319 |
| cg04763450 | 17 | - | 79455576 | rs28365891 | 17 | 79480302 | C | T | -0.143339 | 0.0379349 | 0.000157802 | -0.138479 | 0.0400562 | 0.000546056 | 3 | 0.442486 | 0.039379445 |
| cg09841001 | 17 | - | 79455736 | rs28365891 | 17 | 79480302 | C | T | -0.124326 | 0.0329031 | 0.000157802 | -0.123639 | 0.0338972 | 0.000264891 | 3 | 0.563458 | 0.022577989 |
| cg01881939 | 17 | ACTG1 | 79480981 | rs28365891 | 17 | 79480302 | C | T | -0.209754 | 0.0555118 | 0.000157802 | -0.209754 | 0.0555118 | 0.000157802 | 1 | 0.156402 | 0.014889319 |
| cg02010342 | 17 | - | 79485934 | rs7342974 | 17 | 79483999 | C | T | -0.356759 | 0.0920274 | 0.00010594 | -0.356759 | 0.0920274 | 0.00010594 | 1 | 0.0566292 | 0.010953226 |
| cg20932150 | 17 | FSCN2 | 79495268 | rs28365891 | 17 | 79480302 | C | T | 0.550426 | 0.145672 | 0.000157802 | 0.550426 | 0.145672 | 0.000157802 | 1 | 0.0226356 | 0.014889319 |
| cg15774065 | 17 | FSCN2 | 79495320 | rs11654454 | 17 | 79491186 | C | T | 0.447157 | 0.126696 | 0.000416616 | 0.447157 | 0.126696 | 0.000416616 | 1 | 0.031849 | 0.032101046 |
| cg13700073 | 17 | FSCN2 | 79495324 | rs11654454 | 17 | 79491186 | C | T | 0.420085 | 0.119025 | 0.000416616 | 0.420085 | 0.119025 | 0.000416616 | 1 | 0.036099 | 0.032101046 |
| cg18919720 | 17 | FSCN2 | 79495335 | rs11654454 | 17 | 79491186 | C | T | 0.4556 | 0.129088 | 0.000416616 | 0.4556 | 0.129088 | 0.000416616 | 1 | 0.0306759 | 0.032101046 |
| cg23164850 | 17 | FSCN2 | 79495348 | rs11654454 | 17 | 79491186 | C | T | 0.405286 | 0.114832 | 0.000416616 | 0.405286 | 0.114832 | 0.000416616 | 1 | 0.0387797 | 0.032101046 |
| cg00221012 | 17 | FSCN2 | 79495664 | rs28365891 | 17 | 79480302 | C | T | 0.525723 | 0.139134 | 0.000157802 | 0.525723 | 0.139134 | 0.000157802 | 1 | 0.0248216 | 0.014889319 |
| cg23598886 | 18 | - | 12777645 | rs34920518 | 18 | 12783086 | G | A | -0.0898363 | 0.0303497 | 0.003076103 | -0.116063 | 0.0328721 | 0.000414456 | 7 | 1.25602 | 0.032101046 |
| cg02776148 | 19 | ICAM1 | 10395489 | rs2569693 | 19 | 10399904 | T | C | 0.449887 | 0.110887 | 4.97E-05 | 0.449887 | 0.110887 | 4.97E-05 | 1 | 0.0385641 | 0.005817008 |
| cg05890620 | 19 | ICAM4 | 10397612 | rs2569693 | 19 | 10399904 | T | C | -0.995695 | 0.245416 | 4.97E-05 | -0.995695 | 0.245416 | 4.97E-05 | 1 | 0.00781166 | 0.005817008 |
| cg19298774 | 19 | ICAM4 | 10398798 | rs192560669 | 19 | 10408439 | C | A | -0.604326 | 0.174515 | 0.000534515 | -0.604326 | 0.174515 | 0.000534515 | 1 | 0.0770231 | 0.03877135 |
| cg14016200 | 19 | ICAM5 | 10399157 | rs192560669 | 19 | 10408439 | C | A | -0.329721 | 0.0952159 | 0.000534515 | -0.329721 | 0.0952159 | 0.000534515 | 1 | 0.259636 | 0.03877135 |
| cg00193490 | 19 | ICAM5 | 10402525 | rs2569693 | 19 | 10399904 | T | C | -0.705932 | 0.173996 | 4.97E-05 | -0.705932 | 0.173996 | 4.97E-05 | 1 | 0.0156161 | 0.005817008 |
| cg08963419 | 19 | ICAM5 | 10402829 | rs2569693 | 19 | 10399904 | T | C | -0.381157 | 0.0939465 | 4.97E-05 | -0.381157 | 0.0939465 | 4.97E-05 | 1 | 0.053757 | 0.005817008 |
| cg08845333 | 19 | ICAM5 | 10403403 | rs2569693 | 19 | 10399904 | T | C | 0.182168 | 0.0449002 | 4.97E-05 | 0.182168 | 0.0449002 | 4.97E-05 | 1 | 0.235604 | 0.005817008 |
| cg21994045 | 19 | ICAM5 | 10403936 | rs2569693 | 19 | 10399904 | T | C | 0.199933 | 0.0492789 | 4.97E-05 | 0.201026 | 0.0488395 | 3.86E-05 | 2 | 0.199939 | 0.004779548 |
| cg15011409 | 19 | ICAM5 | 10405226 | rs2075741 | 19 | 10401098 | C | G | 0.304696 | 0.0676711 | 6.72E-06 | 0.301737 | 0.0664543 | 5.62E-06 | 2 | 0.105881 | 0.000982063 |
| cg16911349 | 19 | ICAM5 | 10406935 | rs2569693 | 19 | 10399904 | T | C | 0.41492 | 0.102268 | 4.97E-05 | 0.41492 | 0.102268 | 4.97E-05 | 1 | 0.0453527 | 0.005817008 |
| cg11242791 | 19 | ICAM5 | 10406958 | rs2569693 | 19 | 10399904 | T | C | 0.387013 | 0.0953899 | 4.97E-05 | 0.387013 | 0.0953899 | 4.97E-05 | 1 | 0.0521404 | 0.005817008 |
| cg04295144 | 19 | ICAM5 | 10407184 | rs2075741 | 19 | 10401098 | C | G | 0.220845 | 0.0490483 | 6.72E-06 | 0.220845 | 0.0490483 | 6.72E-06 | 1 | 0.192614 | 0.001141761 |
| cg26316885 | 19 | ICAM5 | 10407317 | rs2569693 | 19 | 10399904 | T | C | 0.241744 | 0.0595843 | 4.97E-05 | 0.241744 | 0.0595843 | 4.97E-05 | 1 | 0.133745 | 0.005817008 |
| cg21448471 | 19 | - | 10407538 | rs2569693 | 19 | 10399904 | T | C | 0.732643 | 0.18058 | 4.97E-05 | 0.732643 | 0.18058 | 4.97E-05 | 1 | 0.0144935 | 0.005817008 |
| cg15538607 | 19 | ZGLP1 | 10416150 | rs75231016 | 19 | 10420982 | C | G | 0.233574 | 0.0572579 | 4.52E-05 | 0.233574 | 0.0572579 | 4.52E-05 | 1 | 0.587857 | 0.005410745 |
| cg27259408 | 19 | FDX1L | 10427154 | rs3176766 | 19 | 10449778 | A | G | 0.32552 | 0.0727018 | 7.56E-06 | 0.32552 | 0.0727018 | 7.56E-06 | 1 | 0.125332 | 0.001249346 |
| cg05323251 | 19 | ICAM3 | 10449942 | rs7249914 | 19 | 10449009 | T | G | -0.705471 | 0.155807 | 5.96E-06 | -0.705471 | 0.155807 | 5.96E-06 | 1 | 0.0274105 | 0.001029335 |
| cg17271145 | 19 | - | 10526715 | rs35164067 | 19 | 10525181 | A | G | 0.474468 | 0.083603 | 1.39E-08 | 0.463891 | 0.0928141 | 5.80E-07 | 3 | 0.142892 | 0.00014488 |
| cg01294028 | 19 | - | 10529124 | rs35615354 | 19 | 10523875 | A | G | -0.298346 | 0.0729006 | 4.27E-05 | -0.298346 | 0.0729006 | 4.27E-05 | 1 | 0.0981524 | 0.005154005 |
| cg02758272 | 19 | PDE4A | 10530972 | rs12983665 | 19 | 10538373 | G | A | 0.66537 | 0.170982 | 9.97E-05 | 0.66537 | 0.170982 | 9.97E-05 | 1 | 0.017795 | 0.010425256 |
| cg12186909 | 19 | PDE4A | 10533016 | rs34681319 | 19 | 10517696 | A | G | -0.462858 | 0.109868 | 2.52E-05 | -0.462858 | 0.109868 | 2.52E-05 | 1 | 0.0451708 | 0.003369678 |
| cg14965524 | 19 | PDE4A | 10541267 | rs35916055 | 19 | 10526831 | A | G | -0.788736 | 0.193425 | 4.55E-05 | -0.788736 | 0.193425 | 4.55E-05 | 1 | 0.0139398 | 0.005439996 |
| cg18345115 | 19 | PDE4A | 10541478 | rs6417247 | 19 | 10522597 | A | G | -0.287554 | 0.0678857 | 2.28E-05 | -0.237042 | 0.0669622 | 0.000400314 | 2 | 0.248341 | 0.031291067 |
| cg08673054 | 19 | PDE4A | 10541704 | rs11085732 | 19 | 10533112 | G | C | -0.363887 | 0.0960088 | 0.000150609 | -0.363887 | 0.0960088 | 0.000150609 | 1 | 0.0566656 | 0.014413359 |
| cg01641792 | 19 | PDE4A | 10572362 | rs17697965 | 19 | 10519410 | T | G | -1.0587 | 0.24935 | 2.18E-05 | -1.0587 | 0.24935 | 2.18E-05 | 1 | 0.00809713 | 0.002948734 |
| cg24189696 | 19 | - | 10585866 | rs62130736 | 19 | 10570752 | T | C | -0.235122 | 0.0445772 | 1.33E-07 | -0.242537 | 0.0436693 | 2.80E-08 | 2 | 0.435966 | 1.04E-05 |
| cg22779878 | 19 | KEAP1 | 10600446 | rs34246431 | 19 | 10549968 | C | T | 0.501132 | 0.127388 | 8.36E-05 | 0.501132 | 0.127388 | 8.36E-05 | 1 | 0.0331328 | 0.00893489 |
| cg02189843 | 19 | S1PR5 | 10625775 | rs118115488 | 19 | 10556897 | T | C | -0.627155 | 0.163203 | 0.000121691 | -0.627155 | 0.163203 | 0.000121691 | 1 | 0.0954094 | 0.012178737 |
| cg16525470 | 19 | CARM1 | 10983625 | rs8105092 | 19 | 11005621 | A | G | -0.491878 | 0.145532 | 0.000725305 | -0.539285 | 0.139338 | 0.000108729 | 2 | 0.123566 | 0.011164918 |
| cg02415661 | 19 | AP1M1 | 16308183 | rs12980622 | 19 | 16335740 | C | T | -0.471239 | 0.123032 | 0.000128077 | -0.471239 | 0.123032 | 0.000128077 | 1 | 0.0464227 | 0.012676085 |
| cg01049813 | 19 | CPAMD8 | 17137306 | rs8105701 | 19 | 17197717 | T | C | 1.15709 | 0.268869 | 1.68E-05 | 1.15709 | 0.268869 | 1.68E-05 | 1 | 0.00791854 | 0.002381659 |
| cg11588903 | 19 | MYO9B | 17208493 | rs6512166 | 19 | 17206465 | A | G | -0.259953 | 0.0617213 | 2.54E-05 | -0.259953 | 0.0617213 | 2.54E-05 | 1 | 0.150525 | 0.003377991 |
| cg18595756 | 19 | MYO9B | 17211623 | rs4808565 | 19 | 17194537 | G | A | 0.576678 | 0.132817 | 1.41E-05 | 0.576678 | 0.132817 | 1.41E-05 | 1 | 0.0327527 | 0.002036952 |
| cg03632204 | 19 | MYO9B | 17212818 | rs6512166 | 19 | 17206465 | A | G | -1.26845 | 0.301171 | 2.54E-05 | -1.26845 | 0.301171 | 2.54E-05 | 1 | 0.00623827 | 0.003377991 |
| cg11992736 | 19 | IL12RB1 | 18197544 | rs1099561 | 19 | 18194543 | T | C | -0.342754 | 0.0657366 | 1.85E-07 | -0.342754 | 0.0657366 | 1.85E-07 | 1 | 0.179516 | 5.32E-05 |
| cg09577367 | 19 | IL12RB1 | 18197699 | rs11575926 | 19 | 18188408 | T | C | -0.547015 | 0.116441 | 2.63E-06 | -0.547015 | 0.116441 | 2.63E-06 | 1 | 0.0690188 | 0.000537572 |
| cg01574571 | 19 | IL12RB1 | 18197710 | rs11575926 | 19 | 18188408 | T | C | -0.812656 | 0.172987 | 2.63E-06 | -0.812656 | 0.172987 | 2.63E-06 | 1 | 0.0311999 | 0.000537572 |
| cg20631180 | 19 | MAST3 | 18208374 | rs62123602 | 19 | 18244233 | A | G | -0.156524 | 0.0486216 | 0.001285542 | -0.158485 | 0.0466687 | 0.000683999 | 2 | 0.663048 | 0.046966497 |
| cg01224103 | 19 | MAST3 | 18221194 | rs56252442 | 19 | 18229208 | T | G | -0.417531 | 0.0835722 | 5.86E-07 | -0.417531 | 0.0835722 | 5.86E-07 | 1 | 0.0898466 | 0.000145956 |
| cg18816098 | 19 | PDE4C | 18335182 | rs11666033 | 19 | 18334805 | T | C | -0.327516 | 0.0949024 | 0.000558441 | -0.327516 | 0.0949024 | 0.000558441 | 1 | 0.0688079 | 0.039970301 |
| cg06907708 | 19 | PDE4C | 18336077 | rs11666033 | 19 | 18334805 | T | C | -0.359942 | 0.104298 | 0.000558441 | -0.359942 | 0.104298 | 0.000558441 | 1 | 0.0569525 | 0.039970301 |
| cg26218977 | 19 | PDE4C | 18336352 | rs11666033 | 19 | 18334805 | T | C | -0.341466 | 0.0989448 | 0.000558441 | -0.341466 | 0.0989448 | 0.000558441 | 1 | 0.0632928 | 0.039970301 |
| cg19697537 | 19 | PDE4C | 18337358 | rs11666033 | 19 | 18334805 | T | C | -0.216148 | 0.0626319 | 0.000558441 | -0.216148 | 0.0626319 | 0.000558441 | 1 | 0.158102 | 0.039970301 |
| cg23866412 | 19 | PDE4C | 18337365 | rs11666033 | 19 | 18334805 | T | C | -0.193377 | 0.0560337 | 0.000558441 | -0.193377 | 0.0560337 | 0.000558441 | 1 | 0.197553 | 0.039970301 |
| cg07938642 | 19 | PDE4C | 18338579 | rs12461072 | 19 | 18330592 | G | C | -0.700979 | 0.191128 | 0.000244914 | -0.700979 | 0.191128 | 0.000244914 | 1 | 0.0164999 | 0.021130808 |
| cg09233782 | 19 | PDE4C | 18343636 | rs11666033 | 19 | 18334805 | T | C | -0.385029 | 0.111568 | 0.000558441 | -0.385029 | 0.111568 | 0.000558441 | 1 | 0.0497612 | 0.039970301 |
| cg11244672 | 19 | YJEFN3 | 19639970 | rs4808951 | 19 | 19550306 | G | C | 0.258318 | 0.0761794 | 0.00069668 | 0.258318 | 0.0761794 | 0.00069668 | 1 | 0.149622 | 0.047655558 |
| cg20038346 | 19 | YJEFN3 | 19641678 | rs4808951 | 19 | 19550306 | G | C | 0.65207 | 0.192299 | 0.00069668 | 0.65207 | 0.192299 | 0.00069668 | 1 | 0.0233665 | 0.047655558 |
| cg21076702 | 19 | ZNF566 | 36979833 | rs2967432 | 19 | 36995855 | C | T | -0.321168 | 0.0844957 | 0.00014416 | -0.321168 | 0.0844957 | 0.00014416 | 1 | 0.0858495 | 0.013919468 |
| cg06454848 | 19 | ZNF260 | 37019165 | rs57126710 | 19 | 37017633 | T | C | -0.527932 | 0.153622 | 0.000589258 | -0.527932 | 0.153622 | 0.000589258 | 1 | 0.0250065 | 0.041770292 |
| cg07797438 | 19 | ZNF260 | 37019581 | rs17707033 | 19 | 37018280 | G | T | -0.874231 | 0.255272 | 0.000615586 | -0.874231 | 0.255272 | 0.000615586 | 1 | 0.00900926 | 0.043127473 |
| cg19364777 | 19 | TTC9B | 40722503 | rs12459567 | 19 | 40789926 | T | C | 0.459796 | 0.136195 | 0.000735549 | 0.459796 | 0.136195 | 0.000735549 | 1 | 0.0268437 | 0.04962338 |
| cg15153957 | 19 | AKT2 | 40736427 | rs12459567 | 19 | 40789926 | T | C | -0.38941 | 0.115346 | 0.000735549 | -0.38941 | 0.115346 | 0.000735549 | 1 | 0.037454 | 0.04962338 |
| cg17359753 | 19 | AKT2 | 40790165 | rs12459567 | 19 | 40789926 | T | C | 0.141014 | 0.0417693 | 0.000735549 | 0.17287 | 0.040697 | 2.16E-05 | 2 | 0.628693 | 0.002931442 |
| cg03213352 | 19 | KCNC3 | 50832677 | rs2112663 | 19 | 50852276 | G | A | -1.21563 | 0.308423 | 8.10E-05 | -1.21563 | 0.308423 | 8.10E-05 | 1 | 0.00541585 | 0.008693416 |
| cg17838026 | 19 | KCNC3 | 50832861 | rs2112663 | 19 | 50852276 | G | A | -0.78922 | 0.200236 | 8.10E-05 | -0.78922 | 0.200236 | 8.10E-05 | 1 | 0.012976 | 0.008693416 |
| cg01017355 | 19 | - | 50836561 | rs2112663 | 19 | 50852276 | G | A | -0.89511 | 0.227102 | 8.10E-05 | -0.89511 | 0.227102 | 8.10E-05 | 1 | 0.0100703 | 0.008693416 |
| cg26522743 | 19 | SPIB | 50921745 | rs1377816 | 19 | 50855792 | T | G | 0.760309 | 0.183743 | 3.51E-05 | 0.760309 | 0.183743 | 3.51E-05 | 1 | 0.0140578 | 0.004410958 |
| cg06512885 | 19 | SPIB | 50922190 | rs1377814 | 19 | 50855935 | A | G | 0.950935 | 0.230526 | 3.71E-05 | 0.950935 | 0.230526 | 3.71E-05 | 1 | 0.00890691 | 0.00461758 |
| cg18254819 | 19 | SPIB | 50922194 | rs1377814 | 19 | 50855935 | A | G | 1.27057 | 0.308012 | 3.71E-05 | 1.27057 | 0.308012 | 3.71E-05 | 1 | 0.00494591 | 0.00461758 |
| cg11122968 | 19 | CD33 | 51727295 | rs12609179 | 19 | 51722582 | G | A | -0.460285 | 0.11451 | 5.83E-05 | -0.460285 | 0.11451 | 5.83E-05 | 1 | 0.0353751 | 0.006654251 |
| cg17365369 | 19 | ZNF766 | 52773256 | rs57361353 | 19 | 53083494 | G | C | -0.546846 | 0.153479 | 0.000366702 | -0.546846 | 0.153479 | 0.000366702 | 1 | 0.020278 | 0.029285038 |
| cg10400499 | 19 | - | 53088849 | rs3745101 | 19 | 53085813 | C | T | 0.11637 | 0.0307402 | 0.000153387 | 0.114842 | 0.0306174 | 0.000176279 | 2 | 0.507009 | 0.016301511 |
| cg07738077 | 19 | ZNF28 | 53303448 | rs3745101 | 19 | 53085813 | C | T | 0.310501 | 0.0820217 | 0.000153387 | 0.310501 | 0.0820217 | 0.000153387 | 1 | 0.0699425 | 0.014644645 |
| cg24012925 | 20 | SRXN1 | 633418 | rs60287906 | 20 | 527676 | A | C | -0.577734 | 0.2246 | 0.01010309 | -0.548406 | 0.151257 | 0.000288306 | 2 | 0.125383 | 0.024042843 |
| cg07795968 | 20 | JPH2 | 42817380 | rs7270729 | 20 | 42829320 | C | A | 0.409577 | 0.120449 | 0.000672927 | 0.409577 | 0.120449 | 0.000672927 | 1 | 0.0690864 | 0.04642252 |
| cg06466728 | 20 | C20orf111 | 42825248 | rs3859609 | 20 | 42823424 | T | C | -0.50609 | 0.146258 | 0.000539741 | -0.50609 | 0.146258 | 0.000539741 | 1 | 0.0480776 | 0.038976061 |
| cg10225362 | 20 | - | 44743722 | rs6032664 | 20 | 44739419 | A | T | -1.15741 | 0.289629 | 6.44E-05 | -1.15741 | 0.289629 | 6.44E-05 | 1 | 0.00680477 | 0.007126819 |
[truncated: 227,010 more chars]
