# Supplementary figures and images for: Multi-Omics Analysis Reveals Potential Therapeutic Targets and Genetic Mechanisms in Primary Biliary Cholangitis
Source: Research Square preprint supplement (doi:10.21203/rs.3.rs-7186861/v1), 2025-08-11

**Supplemental figure 1**

Predicted Protein-Protein Interaction between AIF1 and FAM177A1.


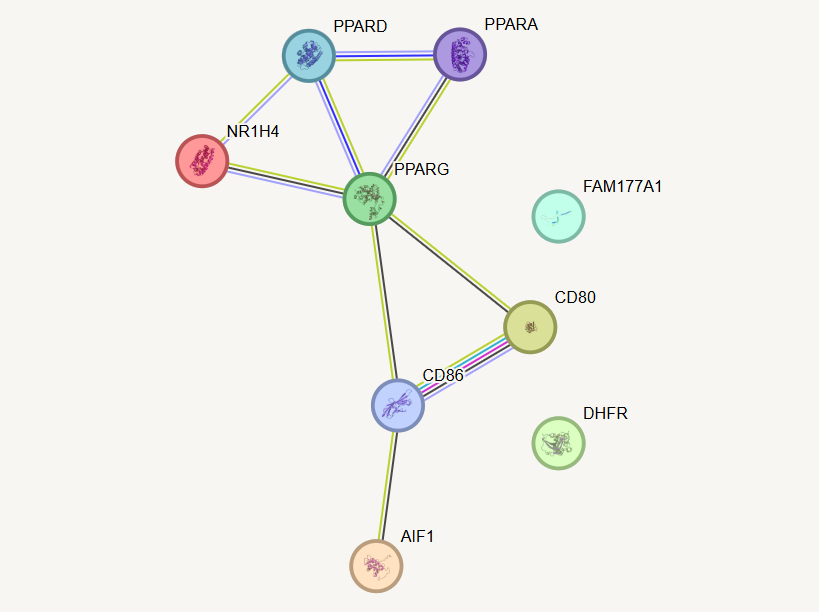

Supplement: Supplementary file 2 [file c9c1d19d1e5e53ea48350274.docx]
